# Supplementary material for: A genome-wide view of the de-differentiation of central nervous system endothelial cells in culture
Source: eLife. 2020 Jan 8;9:e51276. doi: 10.7554/eLife.51276 (PMC6948952; doi:10.7554/eLife.51276)
Supplement: Supplementary file 1. — (A) EC-enriched transcripts for adult brain. PPDE, posterior probability of differential expression (1-FDR). (B) Differentially expressed genes in acutely isolated adult brain ECs when compared to cultured brain ECs. (C) The intersection of genes in (A) and (B). EC-enriched differentially expressed genes in acutely isolated adult brain ECs. (D) Differentially expressed genes in cultured brain ECs when compared to acutely isolated adult brain ECs. (E) All EC-enriched genes. (F) Pan-endothelial cell genes. (G) Tissue-specific EC genes. (H) Blood-brain barrier genes. (I) Blood-brain barrier genes with reduced expression in cultured brain ECs. [file elife-51276-supp1.xlsx]

## Sheet: A) Adult brain EC-enriched
Gene	PPDE	log2PostFC	mean_count_in_adultBrain_GFPpositive	mean_count_in_adultBrain_GFPnegative
Ccl21a	1	11.3874	8721.63	2.35204
Gm49391	1	11.2442	2192.17	0
Degs2	1	10.6717	6417.82	3.03104
Depp1	1	10.2758	2126.62	0.811985
Slc19a3	1	10.064	9700.26	8.1588
Unc45b	1	9.92322	1842.33	0.994312
Tbx1	1	9.79457	802.035	0
Fmo2	1	9.77958	19263.8	21.0146
Cldn5	1	9.76824	79291.2	90.0235
Grrp1	1	9.23913	545.457	0
Gata2	0.999999	9.23802	16843.2	26.9908
Flt1	1	9.12704	551105	984.742
Sox17	1	9.09444	7406.25	12.6463
Adgrf5	1	9.04159	200873	380.278
Gkn3	1	8.90935	2970.82	5.27642
Tek	1	8.89374	59319.6	123.812
Adgrl4	1	8.71551	203873	484.084
Gm10718	0.999999	8.67074	23367.4	56.4382
Ly6a	1	8.64428	64310.9	159.829
Podxl	1	8.49235	136619	378.464
Foxl2	1	8.47863	1755.57	4.0199
Cyyr1	1	8.4777	29763.6	82.5905
Sox18	1	8.47374	5595.59	14.8381
Prom1	1	8.43513	137197	395.481
Robo4	1	8.38578	22291	65.742
Nos3	1	8.33979	19459	59.16
Ccm2l	1	8.21635	4962.95	15.7857
Foxq1	1	8.21501	10596.4	34.7599
Mmrn2	0.999916	8.21383	31311.5	104.561
Ushbp1	1	8.21375	6156.98	19.8378
Rasip1	1	8.12811	4368.94	14.7152
Icam2	1	8.09414	5658.26	19.8055
Ly6c1	1	8.07531	126177	466.911
Ptprb	1	8.0173	147171	567.134
Far2	1	8.00221	4587.62	16.9924
Hspa12b	1	7.9911	14112	54.5657
AU021092	1	7.96437	5559.95	21.3611
Egfl7	1	7.94727	17546.9	70.1935
Slc35f2	1	7.93675	13683.8	54.9475
Cutal	1	7.87445	3690.37	14.8259
Tie1	1	7.81438	10995.8	47.9496
Slc38a5	1	7.78688	13007.5	57.999
Lsr	1	7.72853	21829.5	102.026
Zfp366	1	7.70978	53481.1	254.562
Paqr5	1	7.69609	11777.8	55.8955
Kcnq1	1	7.67396	2363.74	10.6749
Slco1a4	1	7.66429	142421	701.188
Fgd5	1	7.61861	13553.6	68.0645
Abcb1a	1	7.6146	415838	2120.88
Dll4	1	7.52866	10235.9	54.5346
She	1	7.50085	16753.4	91.5967
Edn1	1	7.46906	4988.96	27.2588
Clec14a	1	7.45236	7620.78	42.6137
Gbp5	0.999999	7.40757	8346.95	48.2629
Itpr3	1	7.37786	27903.7	166.867
Sema3c	1	7.36975	85546.2	516.332
Arap3	1	7.35388	14661.3	88.7278
Itm2a	1	7.31938	218176	1365.11
Mecom	1	7.30323	13834.8	86.6974
Slc16a4	1	7.2877	11532.1	72.9075
Sox7	1	7.28607	6819.81	42.7982
Pik3r6	0.999988	7.28491	10148.8	64.1801
Ly75	1	7.2728	8861.47	56.4043
Pglyrp1	1	7.22141	9834.35	65.0018
Tnfsfm13	1	7.22	1938.16	12.1022
Sema3g	1	7.18681	10929.5	74.1179
Tdrp	1	7.18532	22113.2	151.036
Hmcn1	1	7.1678	20898.7	144.446
Pdia5	0.999975	7.16647	12569.3	86.5988
C130074G19Rik	1	7.15989	45785.5	319.276
Palmd	1	7.07082	21347.8	157.893
Clic5	1	7.06554	17506.7	129.799
Erg	1	7.05526	31200.5	233.697
Cd34	1	7.03255	71129.3	542.401
Cdh5	1	7.01398	65438.5	505.41
Slc40a1	1	7.00724	63714.7	494.384
Flt4	0.999998	7.00025	13341.3	103.313
Nostrin	1	6.96262	16964.3	135.115
Trim16	1	6.94261	3998.63	31.6103
Srarp	1	6.85046	3089.58	25.8773
Vwf	0.999296	6.84572	29929.3	259.317
Gimap1	1	6.84374	6916.82	59.3229
Tnfsf10	1	6.83123	11238.7	97.8022
Ctla2a	1	6.81207	20138.5	178.326
Stap2	1	6.79947	2247.87	19.2842
Grasp	1	6.7966	6568.24	58.1879
Shroom4	1	6.72178	15487.1	145.833
Scgb3a1	0.998858	6.6793	478.771	3.77623
Acer2	1	6.65428	13061.1	128.776
Sigirr	1	6.63268	2469.75	23.9946
Cmtm8	1	6.62666	1331.7	12.5818
Thsd1	1	6.59286	10388.7	106.73
Aplnr	0.999191	6.56776	5461.15	56.6748
Slco1c1	1	6.55929	356992	3784.54
Eng	1	6.52649	61727.1	668.692
Ppard	0.999962	6.5121	29142	318.394
Grap	1	6.50662	12768.5	139.533
Notch4	1	6.50292	13613.4	149.21
Emcn	1	6.50067	14061.5	154.393
Ddc	1	6.48467	13044.1	144.763
Kank3	1	6.4815	12976.5	144.328
Lzts1	0.999983	6.47736	6930.11	76.8848
Cdon	0.999779	6.47109	37482.2	421.613
Acvrl1	1	6.46032	35607.5	403.488
Slc7a3	1	6.42309	3832.77	43.7718
Parvb	1	6.37523	33719.5	405.311
Pde2a	1	6.36376	85023.7	1031.53
Adamtsl2	1	6.33454	3579.25	43.4582
Vwa1	1	6.29916	45939.8	582.49
Ifit1	1	6.27367	4036.45	51.2793
Oasl2	1	6.2439	11938.1	156.627
Slc39a10	1	6.24253	161058	2126.24
Pcdh12	0.999577	6.23751	8151.77	107.145
Bmx	1	6.23561	2136.24	27.4573
Pecam1	1	6.22493	85757.3	1145.62
Bend5	1	6.22124	657.504	7.92093
Aqp11	1	6.2208	13313.6	177.612
Kdr	1	6.15813	110775	1550.28
Slc7a1	1	6.12999	58091.9	828.584
Bcl6b	1	6.09365	3856.84	55.5845
Oas1a	1	6.04765	2632.7	38.9089
Slfn5	1	6.04456	53879.2	815.366
Lef1	0.999999	6.01623	24010.2	370.071
Slfn3	1	6.00343	2345.69	35.6743
Slc7a5	1	5.99916	80092.6	1251.28
Tmem44	0.999763	5.99059	21202.4	332.567
Irf7	1	5.97913	1749.61	26.8463
Mfsd2a	1	5.97404	42768.9	679.51
Prkch	1	5.97385	12964.8	205.39
St6galnac2	1	5.95616	6570.04	104.935
Car4	1	5.9467	79319.9	1285.13
Lmo2	1	5.93697	25804.2	420.307
Slc22a8	1	5.91571	60944.4	1008.66
Afap1l1	1	5.90555	22901.2	381.151
Gm10801	0.999433	5.89868	6341.37	105.403
Mfng	1	5.84661	6317.23	108.891
Card10	1	5.84334	2561.83	43.7317
H2-T24	1	5.84116	4341.5	74.843
Slc52a3	1	5.84068	1639.32	27.7167
Msrb2	0.999917	5.82278	7848.65	137.776
Megf6	0.98335	5.81404	8690.21	153.577
Slc26a10	1	5.81079	2020.96	35.1147
Layn	1	5.80688	4875.54	86.2037
Jag2	1	5.71303	20535.6	390.596
Eogt	1	5.68917	42787.8	828.406
Slc2a1	1	5.67161	312908	6138.05
Cdkn2b	1	5.66998	1493.97	28.4567
Slc39a8	1	5.57956	13887.3	289.521
Meox1	1	5.57625	2124.8	43.6498
Jcad	1	5.57192	165201	3472.06
Polk	1	5.5448	17860	381.702
Usp18	1	5.53273	1504.62	31.6174
Lnx2	0.976583	5.51983	33040.5	719.247
Foxf1	1	5.51334	1699.72	36.329
Fzd6	0.99999	5.51058	33742.3	739.274
Pmaip1	1	5.49878	13382.5	295.08
Marveld2	0.994123	5.49085	8277.94	183.198
Rab11fip1	1	5.48737	15963.6	354.966
Gbp9	1	5.48212	8370.75	186.392
Spns2	0.999559	5.4757	7100.18	158.675
Akr1c14	1	5.46449	20233.5	457.361
Gpr160	0.999661	5.4546	5813.96	131.695
Slc25a24	0.999153	5.41694	17736.7	414.273
Ism1	1	5.39002	2180.01	51.1051
Pdgfb	0.999855	5.38522	17238.4	411.579
Rnf125	1	5.37313	3465.42	82.7326
Abcc4	1	5.36628	29146.6	705.723
Gimap5	1	5.3312	1135.13	27.3149
Ceacam1	1	5.31392	13653.2	342.348
Hmgcs2	1	5.28218	17465.3	447.947
Rabl2	0.997931	5.2789	2717.19	69.1055
Als2cl	0.998677	5.26179	15010.9	390.365
Gimap9	0.999588	5.25167	5083.17	132.54
Pir	1	5.24755	1900.29	49.1406
Rnf144b	1	5.22691	7598.97	202.028
Xdh	1	5.21579	12949	347.558
Smco4	1	5.21038	811.11	21.0282
Nbeal2	1	5.19471	10171.8	276.858
Impdh1	0.985315	5.19063	20237.1	553.25
Apcdd1	1	5.18767	163039	4472.61
Adh1	0.995341	5.18657	1079.53	28.7636
Rassf9	1	5.1858	12884.6	353.108
Ets1	1	5.18193	97754.9	2692.03
Gpr4	1	5.16832	8192.58	226.946
Tbc1d22a	0.99869	5.16296	12526.5	348.762
Id1	1	5.16194	12048.2	335.652
Mmp28	0.999999	5.11745	6525.32	187.095
Ramp2	1	5.0868	16540.3	485.825
Gbp3	1	5.08498	5435.97	159.279
Fli1	1	5.07069	10418.5	309.132
Ccdc141	1	5.0692	63533	1891.55
Vps39	0.990538	5.06729	87416.6	2606.41
Fn1	1	5.04516	504749	15286.4
AI467606	0.999739	5.01738	2610.87	79.7366
Cxcl12	1	5.01125	169029	5240.23
Slc16a1	1	5.00926	88246.1	2739.16
Cavin2	1	5.00308	11589	360.507
Rad54b	1	4.99859	2235.11	69.0397
Cd93	1	4.99253	52650.6	1653
Slc6a6	1	4.97633	150910	4793.07
Il2rg	1	4.96885	5753.16	182.835
Mlkl	1	4.96049	717.761	22.1777
Jak3	0.999992	4.94884	2381.43	76.231
Ablim1	1	4.94268	119790	3894.3
Timeless	1	4.92931	3443.89	112.152
Clec2d	1	4.8864	9647.99	325.327
Sp100	1	4.8807	14827.2	502.42
Lrrc8c	0.997914	4.88064	33207.8	1126.37
Nrde2	0.979155	4.87466	5068.27	171.886
St8sia6	1	4.86421	4868.99	166.3
Rflnb	0.999949	4.80121	15759.7	564.379
Tshz2	1	4.78972	12703.2	458.394
Lgals9	1	4.78368	9056.78	327.937
Crispld1	1	4.7713	3623.72	131.823
Bsg	1	4.76458	248660	9147.12
Proser2	1	4.76257	5473.98	200.793
St3gal1	1	4.75477	7101.99	262.187
Vash1	0.999829	4.73888	3963.95	147.581
Ifi47	0.993911	4.73758	3314.95	123.388
Igsf5	0.998912	4.71068	2086.61	78.8173
Ptprg	1	4.70913	134749	5150.64
St8sia4	1	4.70477	18010	689.747
Def6	1	4.70333	4294.09	163.958
Gimap8	1	4.66502	5070.71	199.007
Gm21970	0.99774	4.66254	2383.15	93.2309
Eps8l2	0.999999	4.65647	10557.6	417.757
Rin3	0.995067	4.62157	7092.94	287.267
Abcg2	1	4.61611	36863.9	1502.32
Dpp4	1	4.61606	2655.35	107.413
Notum	1	4.60915	5302.63	216.403
Gpcpd1	1	4.60556	59498.7	2443.1
Ly6e	1	4.60529	21691.8	890.312
Tmem204	1	4.56566	14712.3	620.402
Lrrk1	0.963386	4.56179	15590.1	659.243
Dcaf1	0.984508	4.55974	47854.5	2028.24
Cracr2b	1	4.5537	1661.55	69.8824
Scarb1	1	4.51585	9082.64	396.15
Srgn	1	4.51314	25356.5	1109.58
Rhobtb1	1	4.51277	4906.04	214.044
Tmem88	1	4.50963	782.141	33.4716
Klhl4	0.985849	4.50284	3738.2	164.018
Sgms1	1	4.499	39260.9	1735.44
Klf2	1	4.47931	10291.8	460.542
Ephb4	1	4.45628	6567.77	298.324
Mrps17	0.988618	4.44496	9103.24	417.092
Ccdc88c	0.991879	4.43978	17833.8	820.881
Zic3	0.999993	4.40242	10431.4	492.405
Tspan13	1	4.40167	24224.7	1145.25
Crybg3	1	4.39667	21529.6	1021.27
Gvin1	1	4.36654	12885.8	623.809
Slco2b1	1	4.36434	17304.3	839.289
Efna1	1	4.36388	1392.62	66.7749
Heg1	1	4.34737	77773.4	3819.83
Tcf7	0.999967	4.33141	10129.4	502.294
Spock2	1	4.29855	284764	14469.9
Mtmr11	0.980267	4.2954	10573.4	537.621
Adgre5	1	4.29375	33510	1707.68
Prrg2	0.994497	4.27832	3037.95	155.701
Flvcr2	1	4.26872	5408.81	279.745
Alpl	1	4.25262	9644.73	505.111
Gbp7	1	4.25066	16392.1	860.256
Med20	0.980497	4.24965	15450.9	811.378
Rai14	1	4.24596	10205.6	537.015
Gm10800	0.957323	4.24031	41217.1	2179.95
Sptlc2	1	4.23542	11724.8	621.611
Foxf2	1	4.22933	5153.29	273.888
Edn3	1	4.22818	5227.36	278.06
Zfp41	0.990474	4.19802	9853.12	535.985
Icam1	1	4.18733	4898.61	268.027
Ptprr	1	4.17394	4136.68	228.323
Unc13b	0.998438	4.16626	16991.6	945.527
Slc1a1	1	4.16559	18278.7	1017.68
Gm21738	0.988777	4.15547	3104.8	173.373
Tcirg1	0.970011	4.14914	13025.2	733.273
Stat1	1	4.14316	15037.7	850.217
Bmpr2	1	4.13881	186127	10565
Trim25	1	4.13182	6871.15	391.094
Gm4070	0.9998	4.12592	11184.6	639.762
Xaf1	1	4.10594	1033.11	59.1466
Igf1r	1	4.09788	141053	8236.66
Frmd4b	0.971498	4.09443	46392.7	2714.99
Zbtb46	0.995087	4.09284	6058.56	354.21
Gimap4	0.988024	4.08268	3645.95	214.33
Lrp8	0.999997	4.0779	19302.3	1142.13
Mcf2l	1	4.07719	34270.1	2029.45
Sh3tc1	0.952267	4.07182	4126.98	244.56
Dnah8	0.998662	4.06319	9895.4	591.11
Fbln5	0.98329	4.05982	7382.69	441.827
Myo10	0.996599	4.05117	107070	6457.83
Ccdc137	0.981913	4.03756	6814.91	414.138
Slc9a3r2	1	4.03177	29462.3	1800.44
Prdm1	1	4.03156	2610.76	158.793
Pwwp2b	1	4.02073	2043.97	125.078
Il10rb	1	4.01063	10781	668.019
Timm50	0.980543	3.99664	4665.76	291.443
F11r	1	3.99596	10214.9	639.374
Elk3	1	3.984	16188.1	1022.19
Bche	1	3.98136	10390.5	657.006
Irgm2	1	3.97879	2445.06	154.232
Tcf3	0.999653	3.97706	3913.71	247.681
Itga6	1	3.97209	36915.2	2351.42
Dennd5b	0.97334	3.95197	21936.1	1416.57
BC028528	1	3.94857	2380.48	153.334
Mrpl11	0.975713	3.94588	5131	332.1
Ggact	0.986198	3.93587	4412.51	287.471
Nrp1	1	3.92131	36011.9	2376.07
Erap1	0.967104	3.91162	46093	3061.96
Tmc6	0.978854	3.91024	3196.48	211.761
Colgalt2	1	3.90454	4099.48	272.901
Pltp	1	3.9034	108820	7271.38
Rpl10a	0.962444	3.89511	4777.4	320.262
Rasgrp3	1	3.8742	41828.5	2851.63
Klf4	1	3.87242	27405.2	1870.34
Ubl7	0.955711	3.86989	8627.23	589.247
Ltbr	0.986372	3.86631	5381.22	368.139
Bin3	1	3.86545	2300.19	156.972
Cables2	0.980376	3.85897	6211.44	427.239
Irf1	0.975643	3.84995	8791	608.82
Rrp36	0.977186	3.8494	3344.98	231.223
Vsig10	1	3.84176	1817.25	125.904
Nfatc1	0.999964	3.83901	7815.36	545.282
H2-T23	1	3.82523	1631.34	114.25
Trp53	0.974111	3.80192	4231.32	302.538
Atp10a	1	3.80117	19137.3	1371.99
Ifnar1	1	3.79934	23058.3	1655.35
Klhl5	1	3.7923	21357.8	1540.71
Smagp	0.999962	3.78803	1162.11	83.2888
Gsdmd	0.999977	3.78575	1761.36	126.871
Slc16a9	1	3.78491	4411.38	319.2
Tmsb10	1	3.77714	9821.59	715.552
Carm1	0.964655	3.77271	9015.18	658.754
Pgap2	0.959662	3.76693	6072.52	445.24
Fmnl3	0.996533	3.7624	26953.3	1985.34
Plcb3	0.964212	3.75266	12321.1	913.245
Casp7	0.970327	3.75051	3371.03	249.629
Gm10719	0.973021	3.74812	4532.38	336.474
Snai2	1	3.74708	1006.48	74.1218
Efr3b	0.99999	3.74543	30094.4	2243.05
Hhex	1	3.73863	1497.3	111.332
Trim34b	1	3.73219	1045.96	77.8708
Ctsh	1	3.72484	9026.36	681.857
Plk2	0.999796	3.72451	18198.5	1375.89
Pgm5	1	3.72422	6155.99	464.961
Plpp6	1	3.71588	3995.41	303.233
Hdac7	0.999968	3.71208	20077.3	1531.16
Egfl8	1	3.70635	2040.13	155.457
St6galnac3	1	3.70453	9537.42	730.738
Adam15	0.959531	3.69313	18563.3	1434.37
Rtp4	0.999976	3.67665	2094.71	162.977
Flnb	0.974018	3.67516	46656	3651.54
Tpd52l1	1	3.67363	939.634	72.8019
Stra6	1	3.65702	3036.77	239.902
Sptbn1	1	3.65671	652182	51710.7
Esam	1	3.64435	113554	9080.38
Adcy4	1	3.64183	7800.8	624.11
Arhgef15	1	3.63984	8340.69	668.283
Ocln	1	3.62302	29934.9	2428.79
Tmem140	1	3.62001	6080.86	493.745
Sgpp2	1	3.61221	5480.89	447.365
Kank4	1	3.61092	3093.18	252.339
Cd2ap	1	3.6061	32122.6	2637.12
Ppfibp1	0.999935	3.60508	44981.8	3695.74
Abhd2	0.999998	3.60459	90972.5	7477.79
Ecscr	1	3.55417	691.455	58.0374
Arhgap27	1	3.54269	2288.43	195.546
Lima1	0.98954	3.53751	27129.8	2335.58
Cd40	1	3.52008	739.171	63.6058
Klhl6	0.99991	3.5123	3258.19	284.717
Klf11	0.999127	3.50983	4221.5	369.774
Hrct1	0.977052	3.50849	1012.27	88.1231
Fnbp1l	1	3.50815	18966.9	1666.18
Trim30a	1	3.50261	3110.22	273.587
Anxa3	0.999832	3.48644	24445.4	2180.28
Acacb	1	3.47944	6229.89	557.731
Kif26a	1	3.47287	44728	4027.66
Map3k11	1	3.45352	5098.58	464.59
Gm49342	1	3.44792	1090.98	99.1536
Casp8	1	3.44718	5885.42	538.78
Prickle1	1	3.44457	9745.9	894.344
Apold1	1	3.43021	31765.3	2946.03
Isg15	1	3.42016	1214.72	112.657
Uba7	0.990488	3.41516	1330	123.858
Slc30a1	1	3.41176	58284.3	5475.77
Golim4	0.974261	3.40418	86749.5	8193.36
Map3k1	1	3.40246	21265.8	2010.31
Rgcc	0.979651	3.40066	2652.97	250.389
Ptprm	1	3.39664	30724.8	2916.61
St3gal6	1	3.38835	27556.2	2630.8
Gimap6	1	3.38563	6174.92	590.002
Arhgap31	1	3.38463	38932.4	3726.85
Angptl4	1	3.382	1780.02	169.925
Lrrc49	0.985861	3.37592	12050.8	1160
Lmo7	1	3.37079	10608.1	1024.67
Mpzl1	1	3.35427	32519.5	3179.03
Ripor1	1	3.34983	16074.1	1575.81
Slc52a2	1	3.34605	2689.5	263.675
Cdkn1a	0.99999	3.33367	6551.02	648.979
Itih5	1	3.3284	48427.8	4820.27
Col4a3bp	1	3.32471	31872.6	3180.3
Arl4a	1	3.30917	14971.7	1509.66
Pcdh19	0.999538	3.30814	9343.99	942.563
Wfdc1	1	3.30774	5884.37	593.442
Nucb2	0.972171	3.3003	4909.05	497.506
Mapk12	0.999996	3.2948	1340.17	135.749
Map3k8	0.997244	3.29103	2513.52	255.981
Ocel1	1	3.28148	1543.13	157.889
Tbc1d14	0.950246	3.27797	12098.1	1246.43
Thbd	1	3.27361	17948	1855.11
Rdm1	0.990683	3.25454	2555.77	266.989
Mis18a	0.999373	3.25246	894.187	93.0205
B4galt4	0.998139	3.25173	16462.3	1727.5
Afdn	0.99206	3.24682	61084	6434.02
Swap70	1	3.24489	8884.53	936.374
Cav2	1	3.24412	13928.1	1469.19
Tspan18	1	3.23974	2956.67	312.192
Zswim9	1	3.23835	8041.03	851.256
Procr	1	3.23735	1288.21	135.79
Pqlc1	1	3.22315	3444.77	368.081
Map4k2	1	3.21122	14501.4	1564.99
Zfp979	1	3.18467	987.449	107.797
2019-09-10	0.98165	3.17492	3572.17	394.731
Tjp1	1	3.17376	167511	18562.1
Irf9	1	3.16647	1727.79	191.634
Ppm1f	1	3.16292	9960.54	1111.31
Vsig2	0.99907	3.16007	1577.82	175.712
Slc38a3	0.999998	3.15747	44778.5	5017.73
H2-Q4	0.999631	3.15103	5391.2	606.118
Arhgef3	1	3.14641	12348.2	1393.76
Primpol	0.975558	3.14525	1664.93	187.382
Plod3	1	3.14491	7501.97	847.327
Pde7b	0.995782	3.14327	5677.97	641.846
Sgms2	1	3.14068	5844.98	661.939
Agfg1	1	3.13964	16158	1832.62
Nrp2	0.999855	3.13432	8499.78	967.214
Gbp2	1	3.13181	8524.53	971.729
Fmo1	1	3.12773	3434.23	392.106
Gpd2	1	3.1243	36065.2	4135.19
Flrt2	0.999824	3.11991	12867.6	1479.37
Tfrc	0.994452	3.10519	54994.9	6390.19
Amot	0.994718	3.10235	28133.7	3275.08
Osmr	0.992968	3.09194	18784.2	2202.26
Smad6	1	3.08013	896.873	105.255
Akap2	1	3.07669	46404.7	5499.49
Ltbp4	1	3.05985	34466.5	4132.43
Zbtb22	1	3.05947	1968	235.27
Fxyd5	1	3.05659	5111.54	613.569
Dok4	1	3.05488	6345.13	762.743
Dock9	1	3.04459	30010.6	3636.36
Parp14	1	3.03489	6141.14	748.507
Ndnf	1	3.03161	31189.3	3813.37
Nes	0.999993	3.03121	42590	5209.02
Caskin2	1	3.02345	7432.72	913.319
Samd9l	1	3.02251	6238.86	766.993
Btg3	0.97923	3.01563	2933.32	361.923
Srgap2	1	3.00276	33759.1	4211.03
Vat1	1	2.99976	23226.3	2902.98
Adgrl2	0.999288	2.99347	27702.8	3477.77
Nfkbia	0.998748	2.98402	7249.45	915.483
Maoa	1	2.97766	29531.4	3748.25
Fam13c	1	2.97256	11447.4	1457.62
Ier3	0.999883	2.96192	3147.44	403.164
Ctnnb1	1	2.96011	130080	16715
Ccdc85a	1	2.95013	5162.55	667.229
Cd59a	1	2.94158	12240.3	1592.48
Kitl	1	2.93927	33418.7	4356.15
Mov10	1	2.93918	1628.9	211.594
Ube2l6	1	2.93238	3534.8	462.268
Tec	0.955581	2.92648	5536.55	727.468
Tbx3	1	2.9247	8305.83	1093.07
Selenop	1	2.91673	243537	32250
Slc46a3	1	2.91419	2636.55	348.982
Polg	1	2.9132	9946.14	1319.58
Ifih1	0.999976	2.90497	4384.77	584.629
Zfp937	1	2.90191	2167.22	289.178
Mrtfb	1	2.90118	20986.1	2808.45
Fas	1	2.90065	1638.01	218.564
Wasf2	1	2.89782	37903.5	5084.9
Wwtr1	1	2.89773	23660.4	3174.03
Agrn	1	2.8928	33286.7	4480.99
Nampt	1	2.89146	34009.7	4582.61
Steap3	0.998742	2.88958	1893.54	254.738
Capn15	1	2.88719	4001.32	540.064
Tgfbr2	1	2.88297	19726.1	2673.34
Hlx	0.992169	2.88109	1295.55	175.076
Rpl31	1	2.87788	5458.17	741.759
Kcnj2	0.999992	2.87782	5581.43	758.559
Frrs1	0.97064	2.87642	3588.9	487.952
Lrrfip1	1	2.87468	15318.5	2087.79
Myrip	1	2.8723	4949.28	675.136
Ctnnbip1	1	2.8666	4073.55	557.741
Jpt2	0.976993	2.8578	2582.14	355.423
Nipal3	0.982433	2.85125	5467.52	756.891
Grb14	1	2.8502	5316.81	736.541
Irgm1	1	2.84334	2247.67	312.409
Ppfia1	0.999422	2.8366	20020.9	2801.97
Nedd9	1	2.83516	11972.3	1676.9
Arpc1b	0.999879	2.83498	14741.7	2065.24
Hspb1	0.989581	2.82826	13882.9	1953.97
Mindy3	0.996948	2.82735	3315.36	466.329
Cav1	1	2.82576	30163.4	4253.66
Gtf2h4	1	2.82548	1045.5	146.716
Faim	1	2.81249	4723.27	671.582
Crtap	1	2.80792	6158.96	878.733
Phactr4	1	2.80638	17962.3	2566.99
Rgs12	1	2.80582	11838.7	1692.26
Ubn1	0.971536	2.79269	18710.8	2699.5
Cyb5r1	1	2.78889	985.004	141.755
Ier2	0.999998	2.78679	3734.78	540.425
Cep250	0.999992	2.7814	7428.15	1079.66
Tpm4	1	2.77798	34319.8	5002.92
Pros1	0.984366	2.77534	21089.1	3079.56
Utp4	1	2.76687	2342.64	343.415
Galt	0.976539	2.76398	977.17	143.086
Lbr	0.999795	2.76293	5055.3	743.999
Sema6a	1	2.75986	23842.3	3519.26
Nfat5	0.956267	2.75804	39811.4	5884.36
Sema7a	1	2.75134	31707.5	4708.2
Ifitm3	1	2.72998	11533.5	1737.66
Exoc6	1	2.7258	4682.6	707.081
Dock6	1	2.72108	22480	3408.56
Atp11b	0.955978	2.7138	25889.5	3945.53
Arhgef5	0.986662	2.71002	6987.65	1067.14
Sp110	1	2.70556	1564.77	239.116
Eif2ak4	0.996304	2.70406	4774.38	731.915
Tm4sf1	1	2.69951	41645.1	6410.31
Hey1	0.999989	2.68741	5135.4	796.466
Ankrd13a	1	2.68564	11631.4	1807.13
Plcg1	1	2.67839	20256.3	3163.59
Gstm7	1	2.67565	2245.49	350.685
Tsc22d1	1	2.67383	73896.4	11579.5
Zfp212	0.999999	2.66099	3230.64	510.039
Enc1	1	2.65305	4935.76	783.942
Sec61b	0.972986	2.65303	1281.85	203.035
Arhgap29	1	2.65216	49234.7	7831.59
Trip10	0.979583	2.64728	5104.3	813.991
Pin4	0.999992	2.64579	313.583	49.3464
Gatad2a	1	2.64492	20998.4	3356.51
Gne	0.987498	2.6322	10321.3	1664.04
Jam2	1	2.62912	26451.3	4274.89
Tes	1	2.6272	2256.57	364.486
Casp8ap2	0.999998	2.62572	5605.92	907.539
Gtdc1	0.999391	2.62229	1069.13	172.88
Usp6nl	0.983927	2.61886	17591.1	2863.02
Plscr3	1	2.60841	1439.17	235.239
Paqr7	1	2.60016	2219.39	365.269
Fbxo6	0.986838	2.58766	2387.54	396.426
Stard4	1	2.58653	4913.72	817.31
Tpst2	1	2.58513	4332.55	721.254
Tnfrsf22	1	2.5794	1571.75	262.217
Aspscr1	1	2.56851	6993.72	1178.23
Pnpla6	1	2.56484	15009.7	2536
Mcm3	1	2.56021	1819.9	307.815
Rras2	1	2.55903	3248.79	550.535
Eva1b	0.955872	2.55527	1313.41	222.703
Zfp101	0.999799	2.55352	2782.69	473.249
Fat4	1	2.55114	14001.4	2388.17
B2m	1	2.54688	24906.7	4261.41
Pde8a	0.999993	2.54486	5294.9	906.61
Rfxap	0.996663	2.54172	789.415	134.823
H2-K1	1	2.52859	12670.6	2195.17
Tiam1	0.967093	2.52403	36216.1	6295.66
Mknk2	1	2.51878	1843.63	320.949
Esyt1	1	2.50939	17191.8	3018.65
Zfpm1	1	2.49649	3130.21	553.953
Tmem184b	1	2.49594	15448.5	2737.9
Rufy1	1	2.49141	6407.47	1138.71
Slc3a2	0.996444	2.48901	172454	30718.3
Maff	0.995229	2.48086	1600.42	285.953
Focad	1	2.47673	3277.68	588.096
Ptgfrn	1	2.47498	4949.63	889.547
Mill2	0.999835	2.46951	4732.08	853.649
Smyd2	0.999993	2.46863	1601.76	288.638
Tgm2	0.96484	2.46158	32718.7	5939.27
Tubb5	0.994383	2.44547	20272.5	3721.01
Rps27	0.976957	2.44367	7548.23	1386.74
Apbb2	1	2.44156	40867	7522.22
Unc5b	1	2.4415	7099.31	1306.19
Lhfpl2	1	2.42973	9527.65	1767.6
Cpne8	0.997662	2.42559	1796.27	333.609
Ifi35	0.999879	2.42413	1807.65	336.07
Reck	1	2.42381	4907.25	913.793
Myh9	1	2.42321	497429	92740.3
Mapk7	0.999998	2.41938	1096.93	204.321
Dusp7	0.995096	2.41523	5655.07	1059.45
Insr	1	2.41442	18132.5	3400.58
Atrx	0.962336	2.41299	76811.9	14422
Nomo1	1	2.40958	12293.3	2312.98
1810022K09Rik	0.999951	2.40831	866.201	162.438
Arhgef2	0.999933	2.40656	24755.9	4668.35
Sh3bgrl3	0.992556	2.40514	2925.28	551.532
Ldlrap1	0.953731	2.40485	3573.67	674.076
Ifnar2	1	2.38931	6550.92	1249.67
Prkx	0.991481	2.38194	5779.03	1107.98
Cd320	1	2.37886	1391.45	266.793
Ddx58	1	2.37639	3403.75	654.801
Rapgef3	0.995017	2.37455	12861.5	2479.44
Rin2	1	2.37201	11910.9	2300.18
Arl15	1	2.36923	3535.11	683.487
Bhlhe40	1	2.36916	19477.1	3769.22
Parp12	1	2.36647	4042.43	783.178
Dgcr8	0.999924	2.36594	6349.26	1230.97
Pvr	0.999996	2.35931	1876.9	365.05
Cox16	0.958057	2.35893	1580.62	307.393
Rapgef2	1	2.35703	12461.3	2431.62
Psmb10	0.999999	2.35577	953.113	185.476
Sparc	1	2.35194	283053	55444.4
Shroom1	1	2.35016	12543.9	2459.44
Cast	1	2.3491	17290.2	3392.8
Ldlrad3	1	2.34383	11563.2	2277.08
Mtpap	1	2.34355	4553.95	896.519
Leprot	1	2.3434	10517.7	2071.74
Birc3	1	2.33773	3480.35	687.763
Elf1	0.99986	2.33668	7834.92	1550.32
Gtpbp2	0.983577	2.33483	4446.31	880.62
Nfkb1	1	2.33468	11831.7	2344.78
Sipa1l2	0.995102	2.33054	20829	4140.29
Sh2d3c	1	2.32977	4482.83	890.981
Fcgrt	1	2.32682	21382.8	4261.36
Tgfb1	0.99999	2.32502	4499.44	897.239
Sqor	0.969182	2.32353	1966.23	392.084
Epha4	0.950237	2.31588	21646.5	4346.76
Epas1	1	2.31353	346629	69729.9
Serpinb6b	1	2.30502	2525.26	510.285
Spr	0.999901	2.30456	3569.22	721.767
Rell1	1	2.30353	4752.5	961.98
Crtc2	1	2.3023	2660.8	538.729
Sh3glb1	0.999923	2.29889	22422.6	4556
Gmnn	0.999999	2.29825	435.607	87.8425
Tpm3	0.971215	2.29772	27122.2	5515.53
Atxn7	0.971006	2.29395	6982.78	1423.18
Lrp5	1	2.29197	9678.68	1975.63
Dhx29	1	2.29089	2415.79	492.946
Serpina1b	1	2.28608	1887.04	386.186
Tbc1d10a	1	2.2775	884.98	181.814
Sgk1	1	2.27744	12142.5	2503.84
Fmo5	1	2.27538	3090.99	637.752
Piezo1	0.995854	2.27339	19607.6	4054.98
Cgnl1	1	2.27301	49477.2	10236
Itsn2	1	2.26873	13693.8	2840.91
Lgals3bp	1	2.26711	8278.68	1719.15
Foxp1	1	2.25962	15008.2	3133.4
Plscr2	0.998822	2.25889	1315.11	274.054
Gas6	1	2.25613	10148.7	2123.74
Mapkapk5	0.999836	2.25301	3388.96	710.239
Acot9	0.999394	2.25298	2612.85	547.435
Map3k3	0.999996	2.25212	7845.8	1646.24
Dusp22	0.961176	2.24954	7033.14	1478.29
Git2	1	2.2486	30329.4	6381.44
Mindy1	1	2.24718	13502.9	2843.47
Tm6sf1	1	2.24608	1421.34	298.9
Filip1	1	2.24487	9694.11	2044.48
Smad7	0.999994	2.24276	4504.64	951.034
Gbe1	0.998937	2.23844	8243.92	1746.3
Magi3	1	2.23761	6332.07	1341.93
Cep68	1	2.23661	4113.77	872.165
Apobec3	0.999991	2.23223	1397.84	296.791
Traf5	1	2.22818	1868.62	398.105
Sbf2	0.999991	2.22365	25706.9	5503.09
Ccdc85b	1	2.21845	4131.98	887.139
Mylpf	1	2.21839	496.522	105.983
Mxra7	1	2.21665	693.039	148.391
Tfe3	0.968948	2.21488	3012.67	648.232
Id3	1	2.21297	24576.1	5300.12
Vamp3	1	2.20877	12044	2604.65
Ralgapa1	0.999993	2.20835	20414.6	4416.62
Adgra2	1	2.20728	10302.6	2230.25
Tcn2	0.999999	2.20582	10651.3	2308.08
Arpc3	1	2.2058	5327.38	1154.08
Fry	0.989004	2.2038	47565.3	10324.1
Stat2	0.958283	2.20132	2955.59	641.953
Ccny	1	2.19999	9500.35	2066.93
Timm10b	1	2.19676	548.501	118.936
Serpinb9	1	2.19234	7159.64	1565.8
Alas1	1	2.19172	9842.73	2153.78
Prkd3	0.99316	2.1909	16409.9	3593.32
Dtx3l	1	2.18937	3499.18	766.478
Ucp2	0.999924	2.18895	10703.4	2346.67
Ppp3cc	1	2.18739	2236.09	490.225
Zfp982	0.996306	2.18542	1606.17	352.409
Nrd1	1	2.18022	26549.4	5857.22
Cyba	0.999612	2.17361	2392.81	529.675
Tnfsf12	1	2.17114	2845.13	631.017
Ephx1	1	2.17084	7672.5	1703.22
Shld1	0.999964	2.17064	676.844	149.632
Rps14	0.956315	2.16989	8570.37	1903.87
Yes1	1	2.16968	5354.71	1189.44
Arfrp1	0.987928	2.16844	3458.88	768.726
Atp9b	0.970996	2.16696	7546.51	1679.75
Ric8a	0.999908	2.16658	4731.03	1053.08
Snx3	0.989962	2.16648	25132.4	5597.64
Dnaja3	0.97139	2.16414	4686.15	1044.85
Rpl37a	0.999974	2.16222	3766.16	840.703
Fam43a	1	2.15885	6080.88	1361.02
Bcl2l11	1	2.15607	1855.07	415.513
Sertad2	0.996823	2.15448	5158.39	1157.95
Ptbp3	0.99998	2.15134	16215.3	3649.41
Tpm3-rs7	1	2.14578	14958.3	3379.47
Unc119b	0.999879	2.14517	4614.45	1042.48
Mad2l2	1	2.14031	788.083	178.063
Aff1	1	2.13292	7352.45	1675.63
R3hcc1l	0.976014	2.13112	6165.2	1406.7
Ddx19a	1	2.12951	3800.93	867.951
Ralb	0.998683	2.12689	4096.04	937.094
Atp11c	1	2.1247	8052.18	1845.65
Fam76a	0.976374	2.12264	15043.8	3453.77
Capg	1	2.12166	1523.22	349.314
Hpcal1	1	2.11689	2675.65	616.157
Myl12a	0.999266	2.11546	8096.25	1867.69
Gm28048	1	2.11377	4870.31	1124.55
Axin2	0.995393	2.11053	10565.9	2445.97
Arhgap25	1	2.1054	1721.82	399.432
Rasd1	1	2.10259	1987.44	462.061
4931406P16Rik	1	2.1014	32910.6	7668.55
Max	0.993877	2.0978	9960.09	2326.12
Lysmd3	1	2.09158	2235.79	523.877
Fut8	1	2.08791	18578.6	4369.39
Tmem98	1	2.07949	1403.44	331.362
Fbxo28	1	2.0778	3676.42	870.164
Ppic	1	2.07484	3813.21	904.421
Nck1	0.99994	2.0723	9367.21	2226.65
Rabep2	1	2.0683	1209.1	287.608
Exoc5	0.95833	2.06638	6526.49	1557.56
Hs3st1	0.990176	2.06479	1649.42	393.559
Ostf1	1	2.06293	6549.65	1566.84
Serpinb6a	0.975173	2.06014	11746.3	2816
Sertad1	0.975778	2.05765	834.293	199.716
Rhob	1	2.05349	20248.6	4877.21
Actl6a	1	2.05286	2123.76	511.154
Fzd4	1	2.05258	14064	3389.48
Extl3	1	2.05035	38299.4	9245.73
Gxylt1	0.999939	2.04972	5650.41	1364.06
Nde1	1	2.04875	4898.34	1183.21
Fam129a	1	2.04852	7074.59	1709.47
Nfatc3	1	2.04643	7563.99	1830.43
Sav1	1	2.04371	5448.03	1320.68
Dgka	1	2.04173	3344.76	811.667
Dock4	0.999884	2.04087	15383.8	3737.84
Gtf2ird1	0.999683	2.04085	7636.09	1855.04
Scmh1	0.999976	2.03564	5376.93	1310.75
Pcp4l1	1	2.03381	36791.6	8984.16
Mif4gd	0.999976	2.03159	4527.76	1106.74
Tsen15	0.993103	2.02734	2059.71	504.58
Pdxk	1	2.02599	17429.4	4278.88
Anxa2	1	2.02228	4249.83	1045.5
Snrpg	0.971084	2.02199	864.348	212.137
Rusc2	1	2.02126	9239.86	2275.49
Plekhg5	1	2.01928	6115.53	1507.91
Kctd12b	1	2.01659	10030	2478.16
Afg3l1	0.998788	2.01545	3910.88	966.623
Srpr	0.9515	2.01405	7770.67	1923.16
Klhl20	0.999716	2.01247	2589.37	641.091
Csnk1g1	1	2.00757	2490.3	618.638
Svil	0.98863	2.00412	10912.7	2719.72
Ccz1	0.990361	2.00376	2386.46	594.381
Zhx1	0.995352	2.00204	14911.6	3721.96
Cdc42bpb	0.990213	2.00052	11292.8	2821.49
Lama4	1	1.99893	15480.2	3872.23
Tmem123	1	1.9988	17258.2	4317.48
Qser1	0.994725	1.99653	8377.91	2098.84
Cobll1	1	1.9962	40218	10080.3
Sfxn3	0.998117	1.9884	8294.47	2089.68
Lyar	1	1.98764	2845.61	716.85
Cebpg	1	1.98603	5746.43	1449.91
Sorbs3	0.99972	1.985	5584.02	1409.92
Lrch1	0.999615	1.97884	5724.03	1451.47
Tax1bp3	0.999999	1.9786	923.93	233.76
Sephs1	0.972965	1.97116	5125.76	1306.64
Lipa	1	1.9693	5834.39	1489.29
Dab2	0.995184	1.96894	12759.9	3258.73
Rnf38	0.976576	1.96775	10310.4	2635.18
Esyt2	1	1.96686	48130.3	12311.5
Clic1	1	1.96363	4940.52	1265.99
Dach1	1	1.962	3063.31	785.595
Sh2b3	1	1.95759	5355.43	1378.13
Utrn	1	1.95671	142546	36721.3
Slc31a2	1	1.94849	1891.46	489.383
Senp1	1	1.94591	2699.84	700.077
Igtp	0.998487	1.94504	1989.61	516.048
Cep57	0.999999	1.94243	1873.3	486.722
Trim12c	1	1.94046	2700.74	702.965
Tspan4	0.981801	1.93977	3032.76	789.844
Elovl7	0.96533	1.93804	7036.16	1835.56
Decr2	1	1.93698	3080.01	803.715
Zfp984	1	1.93682	1196.81	311.928
Cflar	0.968834	1.93236	16686.7	4371.27
Vopp1	0.982245	1.92905	4803.58	1260.77
Znrd1	0.992468	1.92776	641.439	167.927
Ndrg1	1	1.92601	36758.8	9672.6
S100a13	0.999224	1.92412	1548.15	407.273
Aldh1a1	1	1.92276	12679	3343.41
Farsb	0.993772	1.92189	3109.34	819.918
Tpd52	1	1.9207	8757.85	2312.52
Zbed6	1	1.92059	6131.78	1619.03
Rassf1	1	1.91797	1182.17	312.168
Tgfa	1	1.91777	4499.75	1190.26
N4bp3	1	1.91543	2558.93	677.688
Tagln2	0.999995	1.91444	29443.4	7809.91
Nmi	0.999671	1.91232	740.225	195.988
Cbfa2t3	0.998196	1.90767	5398.8	1438.24
Xlr	0.97058	1.90382	520.31	138.382
F2r	0.999889	1.90345	3454.83	922.829
Ncaph	0.977177	1.90153	1341.97	358.528
Pim3	1	1.90103	2319.75	620.456
Cr1l	0.999996	1.89894	7296.18	1955.74
Pcmtd1	0.967575	1.89821	18795.6	5041.74
Jdp2	0.998351	1.897	763.797	204.419
Trim21	1	1.89537	1293.52	347.042
Tgfb2	0.999737	1.88832	10999.5	2970.54
Tob1	1	1.88563	15452.6	4181.2
Acsl5	0.983784	1.88437	2587.8	700.277
Pcyt1a	1	1.88411	5581.08	1511.31
Cnot6	1	1.884	12187.2	3301.24
Bcl2l1	1	1.88271	7426.15	2013.13
Aen	0.967406	1.87677	2775	754.956
Hip1	1	1.87245	30927.2	8445.85
Nf2	0.999984	1.8684	13870.6	3798.17
Cdc14a	0.992266	1.86802	1389.24	379.924
Akr1a1	1	1.86091	25274.4	6957.45
Numb	0.994006	1.86091	5884.86	1619.47
Tmod3	0.99999	1.85995	11907.4	3279.68
Cdk19	1	1.85561	11907.6	3289.61
Sbno2	1	1.8556	2512.66	693.639
Tspan14	1	1.85559	6617.77	1827.96
Itprid2	1	1.85554	12169.4	3362.13
Mcl1	1	1.85336	17533.2	4851.62
Mospd1	1	1.85302	3937.83	1089.39
Nav1	1	1.85034	10951	3036.35
Tbc1d9b	1	1.84913	7211.6	2000.99
Tfdp2	1	1.84264	5787.74	1613.04
Samhd1	1	1.83713	5896.72	1649.71
Klf6	1	1.83701	21137.2	5915.66
Ybx3	1	1.83645	9456.1	2647.15
Cers4	1	1.8352	5703.88	1597.88
Gpr146	1	1.83146	10579.3	2971.91
Nudt16	0.975236	1.82582	1515.29	426.784
Entpd1	0.999999	1.82537	23518.2	6635.44
Gbf1	0.993371	1.82352	18483.9	5221.61
Dnase1l1	0.993275	1.81707	1061.66	300.648
Specc1l	1	1.81311	13869.1	3946.15
Dusp1	0.999739	1.81192	11427	3253.91
Tlnrd1	1	1.80995	2082.49	593.279
Atxn1	0.998674	1.8097	7188.78	2049.96
Uaca	1	1.80673	35933.5	10270.5
H2-D1	1	1.80517	44260.3	12664.3
Eif3f	1	1.80462	8493.96	2430.8
Fyco1	1	1.80355	21224.4	6079.48
Kif13b	0.966439	1.79223	16478	4756.98
Nfya	1	1.79168	3534.28	1020.18
Crip2	1	1.78903	6035.73	1745.9
Chmp5	1	1.78795	11226.6	3250.39
Polr2a	0.99909	1.78648	33463.4	9699.67
Cyb5r3	0.99999	1.78601	20485.7	5939.64
Pik3r3	1	1.78498	9129.48	2648.54
Stk4	1	1.7817	6876.55	1999.34
Golm1	1	1.77719	6017.99	1755.12
Mtfr1	0.999055	1.77633	2878.24	839.591
Rprd1b	1	1.77558	1964.91	573.266
Ezh1	1	1.77307	6799.53	1988.81
Map2k3	1	1.77185	1460.23	426.966
Zfp146	1	1.77161	2471.77	723.294
Cdc42ep3	0.999948	1.76629	2184.01	641.381
Crem	1	1.76561	1403.23	412.054
Sox13	1	1.75209	6681.4	1982.89
Rybp	1	1.75076	4395.88	1305.58
9930111J21Rik2	1	1.75067	5682.05	1687.87
Rtl8a	0.970311	1.74677	9424.71	2807.62
Nipsnap2	1	1.74347	5233.56	1562.38
Naa16	0.999999	1.74019	1086.52	324.594
Dnm2	1	1.73445	22185.3	6666.58
Fam57a	0.989462	1.73291	2526.92	759.576
Tnfaip1	0.956219	1.72972	12848.8	3873.42
Dennd4c	1	1.72751	8446.49	2549.97
Rpl22	1	1.72686	5658.39	1708.81
Plxna2	1	1.72074	9153.25	2776.4
Nkapd1	1	1.71911	2108.69	639.856
Dnajc14	1	1.71528	5275.42	1605.96
Bnip2	1	1.71435	13266	4042.06
Scyl2	0.954385	1.71259	2372.43	723.228
Tspo	0.99921	1.71167	2013.42	614.082
Mak16	0.999953	1.71052	1550.48	473.121
Ssu72	1	1.70451	2836.61	869.718
Btbd7	0.999892	1.70379	17279.5	5303.82
Lrif1	1	1.70342	987.399	302.561
Fam118b	1	1.69906	1932.81	594.653
Pdcd4	1	1.69829	6912.9	2129.59
Rnf114	1	1.69735	9181.73	2830.57
Eif4enif1	0.981075	1.6944	4950.63	1529.04
Slc39a1	0.964419	1.68877	12674.5	3930.9
Vangl1	1	1.68838	2768.16	858.27
Tcf4	0.998489	1.68831	48786.3	15137.3
Ikbkg	0.999997	1.68697	1801.63	558.926
Ipmk	1	1.68566	2322.22	721.264
Hyal1	0.999978	1.68237	5716.21	1780.38
Igbp1	0.999997	1.68072	5214.35	1625.87
Iqgap1	1	1.67975	40486	12636.6
Rras	1	1.6775	4806.79	1502.1
Zfp715	1	1.67545	5416.11	1694.99
Tanc1	1	1.67363	9480.85	2971.28
Tmsb4x	1	1.67238	113193	35511.9
Cntln	0.999999	1.6718	3377.29	1059.38
Cyb5b	1	1.67043	6703.42	2105.32
Sec14l1	0.999968	1.66931	7121.15	2238.29
Dram2	1	1.66578	3365.79	1060.19
Pkn1	0.99126	1.66346	12237.5	3862.53
Tnfrsf1a	1	1.66268	4974.87	1570.7
Rpl34	1	1.66231	1086.92	342.775
Wdr11	1	1.66205	6960.56	2198.84
Stim2	1	1.66113	3524.53	1113.81
Rps6	1	1.66001	1268.59	400.809
Arhgef12	0.995543	1.659	63058.2	19967.3
Lrrc8b	1	1.65478	7270.96	2308.54
Eml3	0.999997	1.65206	4098.13	1303.35
Mmd	0.999305	1.65074	3383.94	1077.09
Taf9b	1	1.64878	4097.59	1306.15
Adam17	1	1.64805	18958.4	6048.48
Lrp10	0.951443	1.64608	7125.11	2275.91
Triobp	0.995058	1.64541	7759.49	2479.75
Klf7	1	1.64437	13267.5	4243.47
Uri1	0.994865	1.64196	4806.29	1539.42
Akap13	1	1.63939	12166.6	3904.75
Fam189a2	0.999762	1.63827	2580.35	828.302
Mrpl4	0.999979	1.63698	1819.48	584.401
Sdf4	1	1.63653	14163.5	4554.8
Dnajc2	0.986525	1.63486	2449.78	788.22
Plscr4	0.998377	1.63169	1740.7	561.13
Use1	0.999963	1.6313	4007.17	1292.89
Asxl1	0.970225	1.62707	5496.3	1778.78
Fam98c	0.96732	1.62532	842.063	272.334
Usp42	0.999994	1.6221	3565.02	1157.53
Cd151	1	1.62089	16150	5250.31
Klf13	1	1.62035	6932.81	2254.32
Ahnak	1	1.61786	166222	54157.6
Fcho2	1	1.61735	22374.3	7291.91
Mapk14	1	1.61704	3686.43	1201.18
Gid8	0.999999	1.6099	2717.35	889.651
Hmg20b	0.999056	1.60856	1186.39	388.44
Adipor2	0.997387	1.60615	7383.12	2424.55
Bnip3l	1	1.60486	31667	10410.5
Rcn1	0.995717	1.6012	2468.58	813.042
Fam13a	1	1.59864	2963.39	977.868
Tecpr1	1	1.59674	6071.38	2006.73
Vmac	0.987311	1.59623	3158.77	1044.13
Wars	0.998374	1.59473	3400.02	1125.09
Srpk1	0.999868	1.59445	5214.71	1726.24
Zfp664	1	1.5943	9060.1	2999.95
Lsm2	1	1.59148	731.55	242.146
Prelid1	1	1.59012	5136.88	1705.58
Arrdc1	1	1.58884	1736.09	576.539
Mysm1	1	1.58763	5166.6	1718.42
Map3k7	0.9998	1.58717	9015.16	2999.86
Amotl2	0.998713	1.58364	16677.4	5563.61
Stk38	1	1.57964	11203.7	3747.79
Myo1b	1	1.57761	43101.5	14439.9
Klf3	1	1.57378	74094.3	24889.7
Ankrd37	0.999963	1.57264	671.174	225.044
Zc3hav1	1	1.5724	3575.57	1201.68
Bmi1	1	1.56815	9729.64	3280.62
Psmb8	1	1.56584	1440.21	485.878
Hprt	1	1.56505	5884.31	1988.09
Dusp6	1	1.56333	9759.6	3301.75
Hnrnpm	0.994724	1.55931	40098.3	13605.3
Jarid2	0.995225	1.55719	10970.3	3727.25
Isyna1	1	1.5571	13811.5	4693.01
Cd200	0.999746	1.55601	13338.2	4535.61
Ube2q1	1	1.55275	3908.35	1331.6
Ece1	0.987025	1.55099	26308.5	8977.87
Vcam1	0.999969	1.55027	7462.96	2547.61
Usp53	1	1.54759	11014.8	3767.36
Phactr2	1	1.54715	14563.2	4982.71
Ascc3	0.999938	1.54385	4891.63	1677.08
Plekhm1	0.972539	1.54301	3792.33	1300.82
Skil	0.995697	1.54301	8566.87	2939.29
C2cd3	1	1.54228	4074.46	1398.35
Tmem126b	0.984154	1.53966	2192.18	753.444
Tmem245	1	1.53919	10537	3624.98
Pcif1	0.997004	1.53596	2140.85	737.682
Tnfrsf19	1	1.53577	10313.7	3556.55
Dnm3	0.957851	1.532	9030.85	3122.25
Casp2	0.988704	1.52891	3851.64	1334.15
Cfap97	0.998197	1.52808	2195.85	760.795
Drosha	1	1.5225	10664.9	3711.68
Ccnl2	1	1.52118	3913.23	1362.79
Foxo1	0.999999	1.5208	7394.07	2576.18
Ubr4	1	1.51846	21552	7522.35
Lrp6	0.965855	1.51486	27598	9656.78
Parp9	1	1.51353	1632.46	571.189
Ercc5	0.999241	1.50844	2058.52	722.968
Baz2a	1	1.50539	10345.7	3643.54
Dusp12	0.98935	1.50356	1049.06	369.4
Ttyh2	0.992918	1.49869	9064.97	3207.28
Rps10	1	1.4976	4902.3	1735.53
Tmtc1	1	1.49193	8366.86	2974.13
Nqo2	0.999998	1.49098	1483.46	527.188
Lypla2	1	1.49098	1175.1	417.484
Tpp2	1	1.49085	4806.78	1709.68
Hmgxb4	0.999634	1.48881	3227.47	1149.38
Rps15	1	1.48765	3342.12	1191.19
Ifngr1	0.996355	1.48622	7176.62	2561.09
Pnkp	0.995263	1.48377	1609.57	574.925
Klf10	0.967272	1.48363	2107.18	752.923
Btg2	1	1.48122	10410.9	3728.45
Gpalpp1	0.999995	1.48013	3222.53	1154.55
Ddx27	1	1.47769	2860.96	1026.68
Tle1	0.999987	1.47769	3972.23	1425.7
Egflam	0.999951	1.47702	6388.01	2294.19
Wwc2	0.999997	1.47578	9303.37	3344.34
Lifr	1	1.47385	27122.2	9763.99
Dnpep	0.999904	1.4736	2537.17	913.012
Snx29	0.968969	1.4714	1870.28	673.906
Zfp384	1	1.46887	2929.23	1057.65
Tead2	0.995848	1.46793	1686.93	609.246
Rpl38	0.990961	1.46758	4796.67	1733.84
Prcp	1	1.46696	2909.47	1051.91
Osbpl9	0.999917	1.46578	11759.1	4256.69
Ncoa7	1	1.46528	1880.91	680.622
Cops8	1	1.46511	3576.86	1294.99
Gna11	0.992614	1.46229	6455.54	2342.25
Ets2	1	1.46183	10654.7	3867.42
Rabep1	0.999733	1.46177	7956.52	2888.01
Ppp1r2	1	1.461	8217.73	2984.45
Rab11fip5	0.999998	1.45996	3330.21	1209.97
Tbrg4	0.962687	1.45827	1121.04	407.403
Mcfd2	0.998805	1.45814	5583.71	2031.68
Midn	0.999999	1.45793	8005.01	2913.37
Ubr7	0.997953	1.45782	3543.05	1289.25
Fam117b	1	1.45061	4940.21	1806.88
Mgll	1	1.44994	5741.57	2101.06
Mxd4	1	1.44969	10723.4	3925.26
Ubald2	0.999988	1.4494	1429.41	522.838
Zfp36l1	1	1.44463	43458.7	15965.6
Pxn	0.999864	1.44451	3787.32	1390.95
Nat9	0.973916	1.44305	1032.43	379.144
Rnf20	1	1.44283	9901.3	3641.58
Cbl	0.999967	1.44257	18728.6	6889.91
Zfp169	1	1.44186	2587.32	951.797
Nr3c1	1	1.44155	14957.1	5506.22
Mark4	0.95599	1.43888	2559.84	943.633
Ica1	1	1.43681	1308.59	482.803
Rpl24	0.975293	1.43656	3983.01	1470.95
Ralbp1	1	1.43644	6751.49	2493.95
Dcaf6	1	1.43479	4065.58	1503.29
Anxa7	1	1.43359	6977.52	2582.57
Sypl	0.981341	1.4323	18178.9	6735.43
Enox2	0.999987	1.43121	1569.63	581.481
Pik3c2a	1	1.42954	33176.1	12316
Cttn	0.981255	1.42811	24054.5	8938.53
Ecm1	0.994029	1.42627	2264.8	842.147
Slain2	1	1.4246	8871.47	3304.26
Fam76b	1	1.42403	1937.52	721.484
Kdelc2	1	1.42046	2890.45	1079.29
Stard9	1	1.41987	8273.48	3091.6
Dnajc13	1	1.41803	10908.9	4081.82
Baz1b	1	1.41521	18574.8	6964.18
Bdp1	0.980745	1.41431	7115.32	2669.02
Kbtbd11	0.999561	1.41325	24690.6	9269.91
Exosc10	0.967174	1.41206	3980.51	1495.22
Pon2	0.998877	1.41055	12761.3	4799.86
Fcf1	0.999932	1.40912	333.756	125.11
Baiap2	1	1.40638	2622.18	988.673
Caap1	0.999645	1.40503	995.451	375.329
Tpt1	0.999998	1.4036	67619.7	25558.7
Ccdc9	1	1.39882	10841.7	4111.03
Zfp26	1	1.39711	4256.05	1615.41
Reep3	1	1.39687	19385	7360.95
Rhoa	0.996925	1.39587	33113.2	12583
Gltp	1	1.39566	21802.4	8285.91
Mau2	1	1.39451	4080.44	1551.53
Ddx39	0.999825	1.39378	1295.28	492.381
Tmc7	1	1.38905	3184.54	1215.35
Tpra1	0.99665	1.38864	5108.91	1950.66
Ppil4	1	1.38817	6689.78	2555.27
Adar	0.999879	1.38627	3195.96	1222.06
Atf7ip	1	1.38618	53308.2	20393.9
Golga4	0.997672	1.38385	21425.9	8209.75
Aida	1	1.37613	5208.45	2006
Rpl14	1	1.37528	6479.92	2497.32
Pxdc1	1	1.37513	1725.3	664.579
Ccser2	0.999135	1.37168	13371.3	5166.67
Sik1	0.999997	1.36995	12139.5	4696.28
Rapgef5	1	1.36988	11915.6	4609.88
Snrpb	1	1.36962	3852.22	1490.22
Rps12-ps3	1	1.36954	4659.04	1802.57
Abhd5	1	1.36937	5127.11	1983.94
Znfx1	1	1.36822	9152.9	3545.01
Glul	1	1.36762	91271.4	35369.8
Cpt2	0.999529	1.36353	2724.63	1058.32
Svbp	0.999999	1.36251	829.908	322.203
Ypel3	0.96028	1.35567	4131.15	1613.72
Foxc1	1	1.35341	8147.11	3187.96
Ap1s2	1	1.35124	5321.34	2085.18
Rnf166	0.999766	1.35087	2059.74	806.981
Smarcc1	1	1.34709	3743.64	1471.02
Trir	1	1.34573	2366.75	930.662
2310057M21Rik	1	1.34476	1376.22	541.297
Itpkb	1	1.34409	12975.3	5110.46
Rnf19a	1	1.34224	4599.12	1813.38
Angel2	1	1.34178	2349.94	926.58
Snx6	0.999656	1.34154	4781.67	1886.29
Akap12	1	1.34089	33289.7	13141.4
Rilpl1	0.999999	1.33891	3374.51	1333.46
Ctc1	0.997061	1.33866	1958.17	773.69
Rps3	1	1.33512	37581.4	14895.2
Ptpn12	0.999835	1.33032	8912.09	3543.61
Mid1	0.999509	1.32832	2145.68	853.937
Igfbp7	0.97607	1.32698	45320.6	18064.4
Slc25a1	0.958265	1.32641	4427.21	1764.84
Akap9	0.998906	1.32526	24429	9748.51
Jak2	0.999826	1.32432	7699.03	3073.96
Kif5b	1	1.32428	37011.6	14780
Rap1b	1	1.3215	11985.3	4795
Ctdsp1	1	1.32085	4975.79	1991.26
Ppm1h	0.999526	1.31991	4900.53	1962.41
Rbms2	0.99997	1.31819	3143.82	1260.24
Anapc5	0.999973	1.31512	8859.99	3560.22
Trim56	1	1.31356	6835.02	2749.37
E330009J07Rik	1	1.31194	5810.08	2339.63
Rplp2	0.999763	1.31187	6392.74	2574.45
B4galt5	1	1.30904	7194.88	2903.24
Vgll4	0.974153	1.30655	2723.98	1100.73
Eya3	0.977659	1.30578	2061.22	833.233
Xrn1	0.99994	1.30342	7159.97	2900.42
Rps4x	0.98582	1.30146	34204.7	13876.8
Nolc1	1	1.29902	2972.66	1207.56
Wtap	1	1.29811	4152.6	1688.15
D16Ertd472e	0.998585	1.29762	1478.2	600.79
Brd4	1	1.2964	9093.92	3701.97
Rps6ka1	0.999991	1.2959	2383.23	970.114
Zfp758	0.999992	1.29522	1831.88	745.909
Ctcf	0.999974	1.29504	15153.6	6174.93
Rps19	1	1.2949	7390.24	3011.46
Synj2bp	0.971644	1.28876	4910.98	2009.55
Smarce1	1	1.28748	4832.94	1979.35
Sos1	0.999769	1.28403	8003.56	3286.1
Stag1	1	1.28299	14363.9	5902.22
Cnot6l	1	1.28242	30803.1	12662.8
Chst11	1	1.28183	4757.04	1955.91
Sdcbp	0.999953	1.27879	18448.4	7602.78
Nop53	0.999993	1.27816	9538.17	3932.26
Phf1	0.968145	1.27771	2674.51	1102.56
Cnot11	0.999999	1.2771	1631.41	672.627
Sos2	1	1.27593	9635.69	3978.6
Sar1a	1	1.27486	11098.8	4586.21
Tmem19	0.999986	1.2736	1887.04	779.999
Mtmr6	0.997607	1.27302	12809.4	5299.9
Iars	0.986014	1.27301	5532.9	2288.96
Wdr43	0.999999	1.27245	8863.97	3668.77
Clic4	0.999993	1.27233	32933	13633.4
Tmem115	0.999421	1.27232	1165.91	482.148
Ppm1g	0.969497	1.27222	10779.2	4462.29
Slc25a30	1	1.26902	2281.65	946.224
Med8	1	1.26678	519.52	215.377
Fkbp15	0.999193	1.26583	5094.57	2118.1
Gpx1	1	1.26565	8631.5	3589.41
Mfsd1	1	1.26222	4365.01	1819.26
Taldo1	0.976946	1.26062	8175.16	3411.49
Psme2	1	1.25953	3835.98	1601.68
Kif1c	0.999996	1.25859	23990.3	10026.3
Map4k3	0.99903	1.25634	4399.83	1841.26
Ero1l	1	1.25617	3267.49	1367.42
Zfp207	0.952789	1.25196	10494.8	4405.99
Mfap1a	1	1.25021	8697.33	3655.71
Slc25a45	0.99983	1.24893	1675.88	704.619
Ginm1	0.975998	1.24786	11526.8	4853.1
Irak2	1	1.24638	1601.19	674.386
Spry1	1	1.24397	1436.01	605.777
Card19	1	1.2431	634.762	267.642
Urm1	0.999998	1.24068	689.282	291.164
Pnpla2	0.999815	1.23444	5288.46	2247.11
Bcam	0.991517	1.23376	16897	7184.21
Gpr108	0.99996	1.23006	2399.53	1022.4
Patl1	0.999995	1.22944	3328.42	1419
Msn	0.999993	1.22779	36396.8	15539.9
Dock1	0.999996	1.22699	16563.7	7075.6
Snn	1	1.22252	2650.98	1135.52
Itch	0.997094	1.22185	6716.35	2879
Kdm5c	1	1.22166	6681.29	2864.35
Tubgcp2	0.996091	1.21961	2394.28	1027.59
Cnn2	0.999959	1.21942	10934.2	4695.24
Tmem243	0.997479	1.21937	679.546	291.329
Gusb	1	1.21636	2646.61	1138.5
Gmfb	1	1.21615	4481.78	1928.58
Ap2b1	1	1.20977	17113.2	7398.18
Stat3	0.952086	1.20885	12425.6	5374.97
Ier5	1	1.20879	3444.76	1489.79
H1f0	0.951032	1.20872	11501.3	4975.55
Gng5	0.996965	1.20776	1292.06	558.873
Adpgk	0.999853	1.20688	1119.22	484.339
Zfp790	0.999962	1.20561	1552.2	672.501
Plin2	1	1.20509	1889.7	819.13
Rps3a1	1	1.2029	30093.5	13072.2
Rp9	0.999995	1.20277	1143.65	496.335
Cds2	1	1.20211	17022.1	7397.94
Rpl8	1	1.20128	8074.2	3510.86
Hist1h1c	1	1.20111	4368.63	1899.59
Ints2	0.963054	1.20081	2637.97	1147.09
Cpt1a	0.999944	1.20019	11402.1	4961.87
Ybx1	1	1.19971	18276.9	7956.58
Mafk	1	1.19909	3153.89	1373.17
Mcc	1	1.19668	18162.2	7923.25
Sf3a3	0.999999	1.19526	2367.65	1033.46
Chic2	1	1.19471	2025.85	884.529
Tlk1	0.998824	1.19438	7452.03	3255.83
Cmtm6	0.999993	1.19355	12111.4	5294.88
2019-09-09	0.992597	1.19146	6665.1	2917.87
Polr2m	0.999321	1.1913	17190.8	7527.48
Arid5b	0.999959	1.1911	5791	2535.77
Riok1	1	1.1874	2626	1152.55
Cenpb	0.999828	1.18713	12336.2	5417.22
Sestd1	0.963367	1.18621	4408.47	1936.82
Slc5a6	0.999323	1.18523	3740.57	1644.43
Eef1b2	1	1.18437	9664.75	4252.15
Serinc3	0.950921	1.18399	49001.8	21566.8
St6gal1	1	1.18101	8967.87	3954.7
Maob	0.976497	1.17582	2826.67	1250.67
Brms1	0.976994	1.17582	2157.27	954.376
Rab22a	1	1.17516	3518.38	1557.56
Plcb1	1	1.17482	13654.1	6047.44
Tprgl	1	1.17476	12623.9	5591.33
Ccdc186	0.988196	1.17381	12337.3	5467.99
Cinp	0.999127	1.17365	729.302	322.795
Patz1	1	1.17243	1431.14	634.453
Tnip2	0.999998	1.17086	947.393	420.288
Rif1	0.960336	1.16875	7308.13	3250.2
Anxa11	1	1.16811	2510.48	1116.67
Smu1	1	1.16772	8546.63	3803.82
Ino80d	1	1.16697	8554.29	3809.19
Ptp4a2	1	1.16529	23857.7	10637.1
Mapk3	0.999998	1.16498	14416.3	6428.73
Chmp3	0.99603	1.16383	25335.7	11307.5
Ikbkb	0.998639	1.16222	4561.89	2037.86
Chrac1	1	1.1604	467.74	208.762
Tspan9	0.9766	1.1601	6401.98	2864.27
Atg5	0.999999	1.15962	1310.77	586.242
Alad	0.994826	1.15793	1766.49	791.161
Serinc5	0.99999	1.15723	14056.7	6302.13
Anp32b	1	1.15683	10255.8	4599.19
Cln5	1	1.15611	1839.44	824.898
Mrrf	0.999311	1.15567	1298.56	582.368
Pomp	1	1.15384	8106.32	3642.71
Gas2l1	1	1.15171	882.194	396.57
Prdm5	1	1.15141	1080.96	486.135
Cggbp1	0.999999	1.14946	8083.38	3643.45
Peli1	1	1.14781	6568.95	2964.13
Mob1a	0.999998	1.14765	19880.5	8972.75
Mvp	0.99878	1.14702	3275.77	1478.7
Pnn	1	1.14656	9942.86	4490.71
Braf	1	1.14239	7804.51	3535.02
Etv3	0.965544	1.14207	3035.93	1375.12
Dynlt3	1	1.13851	8709.02	3955.4
Fam133b	0.999773	1.13849	1523.31	691.445
Rpl36	0.999989	1.13832	2861.22	1299.32
Ctbp2	1	1.13606	5268.65	2396.74
Anxa4	1	1.13486	2978.78	1355.99
Fam3a	0.992037	1.1329	848.623	386.478
Rac1	0.971753	1.13265	22246.4	10145.6
Hipk3	1	1.1317	27424.2	12515.3
Cnot1	0.965682	1.13149	20715.3	9454.9
Tfeb	0.993608	1.13081	2511.16	1146.25
Nin	1	1.12978	5440.04	2485.52
Ubxn2a	1	1.12908	3741.18	1710.01
Dab2ip	1	1.12866	9259.62	4234.3
Naa50	0.999945	1.12794	3859.82	1765.64
Fau	1	1.12747	4800.51	2196.79
Rpl23	1	1.12484	8614.81	3949.86
Glod4	0.999993	1.12476	8340.68	3824.36
Zfp157	1	1.12427	1552.92	711.885
4921524J17Rik	0.997736	1.12248	902.619	414.088
Gapvd1	0.999941	1.12102	16998.4	7814.84
Sbds	1	1.12081	6311.38	2901.7
Adipor1	1	1.11992	9546.95	4392.26
Gm10260	0.999215	1.11989	8872.23	4081.88
Hnrnpa1	0.983846	1.11926	8783.99	4043.04
Cacfd1	0.999173	1.11606	1888.33	870.703
Dctn5	0.98735	1.11505	3277.33	1512.58
Txndc17	1	1.11196	1901.71	879.371
Arl6ip5	1	1.10826	10449.4	4846.5
Khsrp	0.999974	1.10665	9753.14	4528.58
Nfic	1	1.10602	20119.6	9346.55
Pitpna	0.999906	1.10449	19139.8	8900.81
Rps16	0.996375	1.10278	432.491	200.893
Syngr2	0.989309	1.09704	3852.34	1800.38
Mphosph6	0.983597	1.09473	775.9	362.813
Zc3h13	0.984239	1.09407	6380.39	2988.35
Rpl4	1	1.09304	30321.4	14213.4
Ivns1abp	0.990082	1.09283	12506.1	5862.9
Cox7a2l	1	1.09234	7095.89	3327.5
Ildr2	1	1.09089	5911.6	2774.85
Tbl1xr1	0.999287	1.09005	25925.3	12177.9
Mcur1	0.996407	1.08963	3712.92	1744.16
Cxxc1	0.992211	1.08884	2604.54	1224.02
Stx17	1	1.08237	1939.89	915.636
Aldh2	1	1.08118	25270.2	11943.3
Mta1	0.99963	1.08097	6143.33	2903.53
Fam220a	1	1.07893	2701.13	1278.18
Lactb	1	1.07853	1053.64	498.433
Tmem37	1	1.07828	721.001	340.985
Hadh	1	1.07772	3743.71	1773.21
N4bp1	0.999993	1.07767	3732.32	1767.87
Gab2	1	1.07752	3851.14	1824.36
Fer	0.963048	1.07693	2744.5	1300.51
Tns1	1	1.07682	61504.3	29157.1
Rpl18a	1	1.07355	10047.2	4773.44
Dhx38	0.999884	1.07334	3123.5	1483.87
Lig1	1	1.07013	1481.08	704.93
Slc35a1	1	1.0694	3828.26	1823.75
Elf2	0.999796	1.06893	8299.49	3955.65
Hbegf	0.995824	1.06767	4341.95	2071.03
Zdhhc3	0.999862	1.06405	5580.73	2668.73
Cog5	1	1.05912	3604.16	1729.26
Rsbn1	0.969778	1.05828	3207.77	1539.92
Enpp4	1	1.05694	4400.37	2114.57
Mga	0.999975	1.05625	12959.2	6231.35
Inpp5k	0.957764	1.05408	2698.39	1299.09
Ophn1	1	1.05311	2684.49	1293.27
Pak1ip1	0.99999	1.05133	2392.82	1154.12
Ptpn14	1	1.04961	4316.72	2084.93
Pkd2	1	1.04925	5372.98	2595.87
Fbxw17	0.994159	1.04846	834.065	402.79
Rpl30	0.96747	1.04738	1657.42	801.47
Copz1	0.974914	1.04699	4051.1	1960.17
Srp68	1	1.0411	4443.93	2159.09
Mtmr12	0.999495	1.03876	3767.61	1833.4
Tcf12	0.999926	1.03646	15310.9	7463.95
Arid2	0.999866	1.03563	6481.06	3161.02
Dennd6a	0.996786	1.03541	5805.5	2831.91
Aggf1	1	1.03421	3494.03	1705.61
Ahsa2	1	1.03343	1943.27	948.913
Ap2a2	0.985505	1.03274	7669.36	3748.19
Nup50	0.970223	1.03174	3461.77	1692.75
Abl2	0.999716	1.03134	4359.3	2132.35
Pradc1	0.972399	1.03125	560.351	273.71
Clip1	1	1.03103	25816.3	12633
Spag9	0.996876	1.03052	33328.7	16315
Birc6	0.999943	1.02986	25824.4	12647.3
Nkd1	1	1.02985	8503.47	4164.2
Cfh	1	1.02973	21945.5	10748.5
Rpl9	1	1.02726	20944.8	10275.9
Tox4	0.999984	1.02607	2101.61	1031.53
Plat	0.999994	1.01954	8494.35	4189.59
Hdac5	0.983053	1.01865	6560.19	3237.51
Anapc1	0.999745	1.01819	8496.57	4194.58
Ppwd1	0.998661	1.01559	950.412	469.643
Stx6	0.955259	1.01469	1998.27	988.561
Macf1	1	1.01291	168097	83299.1
Ccnd3	0.999999	1.01198	5406.12	2680.24
Ddx50	0.981328	1.01033	3945.65	1958.29
Tcea1	0.996765	1.00829	4909.76	2440.37
Eif3k	1	1.0082	3042.36	1512.11
Sec24a	0.999998	1.00675	2989.33	1487.24
Katna1	0.999952	1.00521	1531.29	762.434
Rpl35a	1	1.00462	2082.74	1037.59
Ubtf	0.989938	1.00186	11130.5	5557.63

## Sheet: B) Adult brain EC DEG
Gene	PPDE	log2PostFC	mean_count_in_adultBrain_ECs	mean_count_in_culturedECs
Hbb-bs	1	16.0624	264609	2.43129
Gm10718	1	14.3305	15621.9	0.170167
Hba-a1	1	13.7561	65269.5	3.80104
Car4	1	12.9754	54639.6	6.27994
Gm49337	1	12.4962	1543.98	0
Atp13a5	1	11.3709	3842.78	1.0729
Slc22a8	1	11.3275	41920.7	15.2164
Srarp	1	11.1801	2122.71	0.589046
Gm10800	1	11.1622	27574.7	6.74379
Ddc	1	11.1463	9012.1	3.66599
Serpina1b	1	10.922	1301.46	0.3887
Gm21970	1	10.8799	1620.22	0.402363
Gm10801	1	10.8498	4239.3	1.05692
Atp1a2	1	10.5594	10056	6.18571
Vtn	1	10.5358	18202.1	9.45434
Ptn	1	10.4815	19004.4	12.9066
Ccl21a	1	10.4418	5991.16	3.75156
Slc6a20a	1	10.2407	1175.62	0.595404
Nos1	1	10.1251	27835.1	15.1975
Stra6	1	10.0955	2092.71	1.58758
Atp1b2	1	9.49094	3544.05	4.61774
Ace2	1	9.43405	954.857	0.989467
Slco1c1	1	9.40946	246834	360.199
Notum	1	9.32445	3712.67	5.12714
Pet117	1	9.32431	170.185	0
Rgs5	1	9.24736	61026.6	100.121
Spock2	1	8.98184	197186	389.102
Axin2	1	8.68938	7252.4	15.9514
Gm21738	1	8.67943	2085.67	2.90539
Gkn3	1	8.56666	2042.56	4.82361
Hmgcs2	1	8.47582	12056.6	33.0481
Sgpp2	1	8.42739	3796.52	10.7541
Aplnr	1	8.42018	3698.11	7.52494
Slc26a10	1	8.20709	1411.51	4.32358
Tiam1	1	8.18282	24771.3	74.1437
Ntm	1	8.16418	635.736	1.95228
Pln	1	8.11459	1643.74	3.7041
H2-T24	1	8.0797	3018.33	10.8337
Abcc9	1	8.00058	5864.11	21.5181
Prkcb	1	7.99251	3164.33	11.164
Edn3	1	7.97983	3617.85	14.0261
Nat8f1	1	7.93412	10239.2	24.0696
Kcnj8	1	7.83918	1324.8	4.52185
Slc38a3	1	7.80975	30749.5	127.148
Higd1b	1	7.74488	669.576	2.35118
Gm21750	1	7.65116	612.821	2.30886
Mfsd2a	1	7.55535	29210	131.927
Slc38a11	1	7.46931	969.65	4.39401
Hmcn1	1	7.41391	14368.7	79.3878
Gm11027	1	7.36885	58.3241	0
Syt7	1	7.12939	7140.96	31.9287
Degs2	1	7.0677	4393.17	28.7779
Sema5a	1	7.06228	4218.04	24.0922
Alpl	1	6.98228	6762.27	48.6889
AC141477.1	1	6.95586	32.3137	0
Cdon	1	6.85793	25075.6	126.623
Gm11273	1	6.85641	128.363	0.847951
Gm45140	1	6.81293	1085.32	8.53423
Wnk2	1	6.80537	2343.95	20.5552
Kbtbd11	1	6.51365	17187.3	185.697
Slc38a5	1	6.46116	8894.25	87.8209
Adamtsl2	1	6.43554	2483.59	28.4303
Gpr160	1	6.41468	3916.16	30.0083
Egflam	1	6.41026	4465.43	49.7829
Slc39a10	1	6.39832	111623	1322.78
Mbp	1	6.38262	4740.68	53.9365
Pllp	1	6.27221	3975.72	50.5578
Hba-a2	1	6.24274	105.96	1.10508
Casq2	1	6.17743	1453.25	18.6106
Ltbp4	1	6.15725	23746.4	322.162
Fam81a	1	6.14827	874.515	12.0742
Sp1	1	6.07308	83254.9	1164.73
AL731706.2	1	6.06401	86.3073	0.584698
Sema3c	1	6.04704	59340.9	897.109
Ndnf	1	6.01412	21526.5	327.315
Plp1	1	5.97143	881.915	13.7303
Lrp4	1	5.91357	5639.6	63.2241
Tcf7	1	5.82044	6924.9	106.701
Gm10203	1	5.78786	20.6918	0
Car14	1	5.77831	895.992	16.0042
R3hdm2	1	5.73996	23318	430.389
Reg2	1	5.68814	176.057	3.03729
Oasl2	1	5.677	8176.55	143.629
Itih5	1	5.64256	33819.4	652.878
Atf7ip	1	5.63648	37129.8	735.442
Zfp36l1	1	5.63517	30048.4	600.571
Gm21897	1	5.62748	1039.46	20.7379
Cdkn1c	1	5.59365	10018.4	152.602
Ppard	1	5.58518	19618.4	268.937
Ptprs	1	5.57132	26648.5	340.16
Slc19a3	1	5.55214	6662.58	132.911
Pglyrp1	1	5.48233	6711.89	127.419
Dnah8	1	5.41769	6749.36	132.651
Slc6a6	1	5.38245	104478	2499.55
Fmo1	1	5.32349	2398.9	57.4688
Pcdh18	1	5.30338	8809.99	161.534
Palmd	1	5.30335	14751.7	370.046
Gtf2i	0.999988	5.29861	35957.9	829.585
Klf4	1	5.27345	19005.4	491.053
Nkd1	1	5.2682	5900.95	152.823
Rgs4	1	5.25792	1938.83	49.3933
Tnfsf10	1	5.25448	7792.48	203.855
Pde7b	1	5.23336	3879.52	89.3933
Fam13c	1	5.19218	7973.3	214.792
Zfp366	1	5.16191	36956.4	1023.12
Isyna1	1	5.15975	9557.98	266.353
Slc7a3	1	5.15222	2644.39	72.7968
Ccdc141	1	5.11845	43737.1	1213.1
Gm49345	1	5.11803	1019.73	25.898
Ptgds	1	5.09255	1338.45	27.1681
Prdm1	1	5.09055	1795.68	50.0996
Pde5a	1	5.08699	7928.14	232.993
Abcb1a	1	5.08688	290785	8157.65
Nr4a2	1	5.07693	1837.71	44.8464
Pltp	1	5.05254	75307.4	2262.07
Auts2	1	5.04119	8510	201.77
Ep300	1	5.00352	32240.2	783.354
Pcp4l1	1	4.99879	25526.9	797.951
Golim4	1	4.98595	61323.1	1570.1
Aqp11	0.999998	4.93319	9333.04	282.775
Tbc1d4	1	4.91668	11314.6	350.751
Gbp5	1	4.916	5682.6	154.042
Elk4	0.999999	4.89834	54395.2	1405.77
Efr3b	0.999991	4.89106	20624.9	635.399
Smarca2	1	4.88084	39244.7	1118.23
Mllt10	0.999999	4.86086	28340.3	588.759
Slco1a4	1	4.85862	98231.8	3317.81
Nedd4l	1	4.85691	15422.2	451.82
Ccdc88c	1	4.85254	12002.2	275.669
Rarres2	1	4.85005	430.841	12.5545
Map3k1	1	4.84993	14760.2	511.198
Ceacam1	1	4.78931	9405.32	330.065
Eln	0.999997	4.76289	5093.51	143.164
Megf6	1	4.7546	5865.76	152.235
Arap2	1	4.74899	17648.9	633.484
Nfat5	1	4.73245	27184.6	885.186
Rere	1	4.72193	19065.9	693.272
Vps39	0.999996	4.70393	58456.7	1344.32
Notch3	1	4.67249	4756.91	179.761
Pomc	1	4.67234	598.964	23.1203
Zbed6	1	4.65732	4231.14	164.687
Mtcl1	0.999998	4.65633	9034.83	244.228
Flt1	1	4.652	378687	14272.6
Gpr85	1	4.64992	794.553	31.2005
Apcdd1	1	4.63936	112065	4275.26
Notch1	0.999992	4.6256	153064	4630.1
Etl4	1	4.61823	5499.83	219.402
Slc35f2	1	4.61535	9465.23	384.36
Slc40a1	1	4.585	44531.8	1782.54
Pogz	1	4.58344	5441.5	220.554
Tgs1	0.999994	4.57408	15912.8	423.423
Itm2a	1	4.55775	150944	6385.35
Mbtps2	0.999986	4.54132	17510.2	484.284
Lnx2	0.999997	4.52266	22332.4	703.296
Syne2	0.999999	4.52182	34769.8	1269.99
Ip6k1	0.999993	4.51656	112469	2971.87
Cnot6l	1	4.51512	21455.7	925.959
Srgap1	0.999996	4.51433	14556.2	457.521
Tril	1	4.50304	2653.16	112.599
Dixdc1	1	4.50221	1620.1	61.5537
Adgre5	1	4.50082	23042.7	972.752
Xdh	1	4.47497	9105.86	364.813
Lime1	0.999999	4.46586	1613.35	45.827
Tmtc2	1	4.45721	8333.11	368.504
Ncoa6	0.999995	4.44901	13543.6	432.358
Gm10031	0.999996	4.44539	3922.85	166.754
Fus	1	4.43875	15628.4	708.13
Jarid2	1	4.43621	7627.64	350.445
Mink1	1	4.43173	17333.1	697.033
Ccdc9	1	4.41742	7511.79	351.034
Cnot3	0.999997	4.41309	7527.63	279.357
Gdpd3	1	4.40923	931.956	37.522
Dhrs3	1	4.40848	3181.01	130.857
Hspa1b	0.999989	4.4057	10788.2	347.018
Gja1	0.999982	4.39971	39305.6	1219.65
Scgb3a1	1	4.38386	323.531	10.973
Net1	0.999965	4.37711	19772.7	882.818
Colgalt2	1	4.3705	2852.32	136.586
Mical3	0.999841	4.36989	6287.31	278.531
Foxq1	1	4.35882	7346.91	357.694
Nfia	1	4.3543	12054.2	584.845
Slc3a2	0.999933	4.34947	118261	5378.81
Ptprg	1	4.3425	92775.6	4427.65
Ncoa1	1	4.33515	8191.43	405.183
Palm	0.999996	4.33291	14071.1	570.796
Cecr2	1	4.32517	2734.74	122.885
Safb2	1	4.31513	7839.27	344.043
Ptprr	1	4.30962	2866.58	144.225
Hnrnph3	1	4.29472	4803.02	244.219
Lrp8	0.999853	4.2915	13222.4	617.617
Plekhh2	1	4.28877	2519.24	128.64
Amot	0.999999	4.27931	19235.1	881.375
Kmt2d	1	4.27677	13462.9	692.171
Mef2c	0.999999	4.27492	17106.3	752.538
Klf3	1	4.26582	51395.5	2669.39
Emsy	0.999998	4.26125	7632.92	336.927
Mcf2l	0.999999	4.26	23520.4	1150.44
Atrx	1	4.25827	52565.4	2479.06
Mbd6	0.999995	4.25666	1662.1	68.3017
Klf12	1	4.2479	7829.83	369.891
Lrrc49	0.999999	4.23884	8216.68	371.068
Itpr2	0.999982	4.23347	33076.7	1152.36
Sparcl1	1	4.22774	173668	9239.52
Pwwp2a	0.999969	4.22577	8271.39	297.456
Akap9	1	4.22568	16883.6	895.262
Msrb2	0.999991	4.21874	5293.92	199.837
Mtss1	0.999999	4.21164	13241.1	623.051
Art3	0.999996	4.21146	1381.87	49.8197
Gm49369	0.999992	4.20562	1073.08	43.7705
Trim34b	1	4.2049	721.091	38.0588
Zswim9	0.999986	4.20385	5635.93	285.772
Sod3	1	4.18991	1377.89	72.563
Isg20	0.999985	4.18578	1199.23	47.8385
Slc16a4	0.999997	4.16712	7912.68	411.943
Spaca6	1	4.16264	1798.23	97.937
Lef1	0.999981	4.14352	16952	808.573
Thra	1	4.13629	7448.27	417.959
Atn1	0.999985	4.12184	7454.74	340.402
Rasd1	1	4.12177	1389.22	76.6011
Lrp1	1	4.11451	11489.4	661.845
Tdrp	0.999997	4.10475	15179.9	830.729
Git2	1	4.10457	21191	1190.73
Zfp101	0.999998	4.09953	1909.54	104.21
Ifit1	1	4.08844	2788.46	161.977
Nrep	1	4.07777	5007.85	296.083
Zfp609	0.999761	4.07487	5231.42	286.988
Bche	1	4.07325	7187.07	425.102
Pitpnc1	1	4.06644	8750.4	515.827
Cdk11b	0.999987	4.05143	15128.6	773.898
Fcho2	1	4.04585	15528.8	939.447
Cobll1	1	4.04415	27828.4	1680.66
Setd1b	1	4.03787	2516.12	150.62
B4galt4	1	4.03663	11258.3	615.649
Tshz2	0.999856	4.03635	8702.95	487.627
Myh11	0.998428	4.03339	12743.6	710.155
Fyco1	1	4.02561	14800.7	891.583
Lmo2	1	4.02031	17908.4	1102.64
Sema6a	1	4.01814	16427	988.208
Slc16a2	0.99941	4.00625	27506.5	1566.94
Fry	0.999946	4.00455	32611.6	1887.33
Mylpf	1	3.99817	346.172	21.0825
Mfn1	0.999997	3.99432	16267.3	912.679
Ndrg2	1	3.99379	1000.1	62.4706
Dmtf1	1	3.98763	14027.5	860.306
Ankrd44	1	3.98461	3583.39	217.483
Pik3r6	0.999981	3.97962	6804.65	275.949
Parvb	1	3.97664	23306.4	1469.87
Snx29	0.999999	3.96548	1284.19	77.5315
Egfl8	0.999989	3.9604	1430.51	85.4601
Zfp229	0.999956	3.95642	6737.55	311.986
Gatm	0.999997	3.94904	6693.36	411.129
Acacb	1	3.94869	4292.7	270.974
Wnt5b	0.99998	3.94707	3145.15	142.276
Coro2b	1	3.9437	2031.94	126.564
Gstm7	1	3.93973	1558.19	101.276
Gpcpd1	1	3.93945	41049.2	2634.83
Nostrin	0.999999	3.93917	11645.9	714.832
Ppig	0.999984	3.93557	7576.64	418.9
Kmt2e	1	3.93102	15760.7	992.778
Chd2	1	3.91819	15579.5	1029.48
Setd2	0.999919	3.91085	21823.1	1153.83
Nr4a1	0.999999	3.89767	7482.28	451.847
Nbeal2	1	3.8886	7043.86	474.837
Bptf	0.999984	3.87651	25816.9	1523.4
Parp4	0.999899	3.87052	14185.4	655.858
Pcca	1	3.86895	5513.2	375.468
D3Ertd751e	0.999979	3.85969	1590.12	83.0212
Inpp4a	1	3.85306	2447.11	168.822
Madd	0.999972	3.85079	4855.4	270.898
Cyyr1	1	3.84666	20579.8	1422.18
Crebbp	0.998282	3.83936	18346.8	1178.64
Clec2d	1	3.83445	6702.25	467.728
Epb41	0.999008	3.8339	8121.67	522.917
Rassf8	1	3.8321	9923.97	693
Rab2b	0.999924	3.83207	14848.6	674.883
Slc30a1	1	3.83062	40424.5	2840.26
Taf15	1	3.82666	3303.41	228.358
Cep85l	1	3.82233	5365.52	377.405
Ndrg3	0.999864	3.82087	13616.5	665.7
Epas1	1	3.82084	240645	17006.8
Hsd17b11	1	3.81854	4913.93	333.714
Ubr1	0.999862	3.81688	20775.3	1144.63
Ehmt1	0.999992	3.80919	11857.4	750.896
Agap1	0.999986	3.80083	26316.5	1698.27
Safb	0.999827	3.79806	8829.06	592.246
Grb14	1	3.79684	3707.76	261.289
Fam13a	1	3.79154	2066.61	145.902
Hyal1	1	3.78865	3937.85	277.881
Setd1a	0.999944	3.78794	2989.16	180.879
Slc5a6	1	3.78172	2606.73	186.719
Atp11b	0.999983	3.7799	17680.1	1137.74
Irf2	1	3.77838	5445.86	384.24
Mtus1	0.999879	3.77719	17837.5	1210.4
Fnbp1l	1	3.77157	13043	918.414
Bmpr2	0.999931	3.76959	127780	8851.78
Trim44	1	3.75733	22155.4	1623.48
Dnm3	1	3.75216	6310.64	453.027
Gjc1	1	3.74729	4828.47	358.734
Rreb1	1	3.74006	6109.75	450.324
Gbp7	1	3.73784	11317.9	837.998
Rasgrp2	0.999897	3.73321	5012.97	267.426
Calcoco1	0.999948	3.73101	9525.16	673.125
Rabl2	0.999922	3.72705	1844.08	111.266
Neo1	0.999889	3.72692	5756.29	352.49
Myh10	1	3.72649	33215.4	2507.34
Hnrnpm	1	3.72595	27586	2013.59
Fmo2	0.999991	3.72177	13556.2	919.332
Dock6	1	3.71517	15462.8	1135.63
Sass6	0.997695	3.69796	1157.58	80.8305
Ap1ar	0.998031	3.69432	7368.01	520.702
Eif2b4	0.995231	3.6879	5588.97	392.921
Jam2	1	3.68037	18247.2	1400.48
Cyp2d22	1	3.67812	5409.75	421.225
Ncor1	1	3.67307	24517.4	1905.69
Ecm2	1	3.67216	3305.97	253.183
Rad54b	1	3.66949	1564.34	117.055
Zc3h11a	0.999951	3.65961	13842.2	960.937
Rab11fip1	1	3.65421	11118.4	873.455
Osbpl1a	1	3.64774	8184.93	624.024
Polr2a	1	3.64773	23015.9	1769.4
Ccdc186	1	3.64601	8569.51	682.707
Psd3	1	3.64483	3604.38	284.408
Nol8	0.99969	3.6408	9910.46	546.927
Arid1a	1	3.63919	9665.99	765.145
Tut4	0.999869	3.62722	6104.31	398.963
Camk2n1	1	3.61895	3246.14	254.936
Hmgn5	1	3.6137	2212.6	179.638
Afap1l2	0.999938	3.61367	5387.17	366.727
Rapgef6	0.999743	3.60398	13911.5	908.979
Utrn	1	3.5961	98602.3	8117.87
Gigyf2	0.999904	3.59374	14360.9	996.494
Srrm2	1	3.58854	37822.3	3050.31
Ablim1	1	3.58326	82572.9	6754.76
Marveld2	0.99981	3.58276	5606.44	363.432
Pnisr	0.999948	3.57597	4907.54	356.698
Tjp1	1	3.57357	115779	9665.83
Filip1	1	3.57262	6734.75	563.684
Arhgef9	1	3.56728	1554.53	126.239
Shank3	0.999771	3.56204	11785.9	802.339
Sp100	1	3.56049	10311.3	869.816
Cbfa2t3	0.999934	3.55986	3783.35	301.781
Atp8a1	0.994539	3.55974	12647.6	973.89
Slc16a1	0.991982	3.55939	60400.7	4696.35
Klc1	1	3.55716	33183.9	2780.09
Zfp704	0.999792	3.55614	8086.27	542.673
Aldh1a1	1	3.55612	8779.28	739.993
Fut8	1	3.55225	12907.6	1098
Zfp512b	0.999777	3.54414	5671.38	324.111
Phactr4	1	3.53804	12477.6	1068.32
Prrc2c	1	3.53779	18246.7	1568.27
Kif13b	0.999862	3.53708	11302.2	914.395
Zfp969	0.999791	3.53387	102.033	6.44663
Rassf9	0.997324	3.53119	9053.9	717.424
Polr2b	1	3.52763	21537.2	1825.87
Aif1l	0.999959	3.52192	9056.87	747.346
Traf5	1	3.52126	1290.94	111.37
Pnn	1	3.51718	6898.93	601.93
Hmbox1	1	3.50951	5684.74	493.842
Zfp169	1	3.50028	1794.84	158.364
Tle3	0.999364	3.49249	13639.5	784.509
Car2	0.999964	3.48989	3986.93	308.057
Pkp4	1	3.48796	21498.1	1854.49
Arl4a	1	3.48749	10463.1	904.094
Ctcf	1	3.48731	10471.9	927.827
Kmt2c	1	3.4803	12497.4	1116.95
Clic5	1	3.4721	12168.6	1091.36
Lifr	1	3.47187	18842.6	1692.27
Gpr155	1	3.46778	2343.75	206.639
Adamts10	0.999911	3.46602	4822.01	353.164
Tnfrsf19	1	3.46177	7132.09	644.54
Syne1	1	3.45825	25258.2	2268.16
Chd8	0.999876	3.45622	11459.7	989.132
Erap1	0.999531	3.45446	31050.4	2016.05
Anp32a	1	3.45086	17984.2	1615.86
Frmd4b	0.999619	3.44877	31210.5	1988.53
Golga4	1	3.4409	14754	1323.36
Atxn2	0.999615	3.43958	9264.75	704.438
Smn1	0.999709	3.43876	2233.98	177.304
Csrp2	0.998966	3.43127	19197.9	1309.23
Prickle1	1	3.43007	6741.1	622.313
Cttnbp2	0.996565	3.42863	2170.44	183.657
Kctd12	1	3.42785	7811.1	706.497
Tbc1d14	0.999816	3.42495	8233.79	650.059
Map3k8	0.999994	3.41355	1716.84	143.8
Pard3	1	3.41219	10219.7	957.05
Dcaf11	0.99725	3.41079	13249	1155.34
Sptbn1	1	3.41011	449301	41302.5
C2cd3	1	3.40948	2820.11	264.723
St6galnac3	1	3.40154	6565.81	604.852
Stk38	1	3.39654	7756.64	735.387
Hnrnpul2	1	3.39451	13264.1	1250
Dcaf1	0.998812	3.39257	32095.4	2025.24
Ubap2	0.999	3.39181	18330.8	1236.27
Gper1	1	3.38879	1212.66	113.674
Flvcr2	1	3.38416	3738.32	355.858
Ezh2	0.999454	3.38331	3674.17	271.444
Slfn5	1	3.38215	37313.3	3564.12
Podxl	1	3.38097	93943.4	8697.45
Irf7	0.999981	3.37396	1232.25	105.975
Taf1	0.998978	3.37387	17614.4	1261.3
Parp2	1	3.3721	2622.3	252.786
Zfp532	0.999379	3.37148	6607.44	491.033
Ahdc1	1	3.36906	1954.4	188.353
Rbm33	1	3.36763	5503.13	518.351
Srgap2	1	3.36678	23427.6	2269.52
Vamp2	1	3.36365	4183.21	405.615
Kifc3	1	3.36341	8756.53	848.349
Timeless	0.999996	3.36195	2364.95	219.104
Hirip3	1	3.36003	547.805	52.7003
Huwe1	1	3.35346	41547.4	3938.94
Prom1	1	3.35307	94405.7	8962.6
Smc1a	0.999989	3.35215	17679.7	1652.46
Adnp	0.999963	3.35098	4108.11	383.605
Stard13	0.999922	3.3489	20016.2	1754.07
Wnk1	0.99979	3.34053	63842	5982.48
Gpd2	1	3.34012	25069.3	2467.64
Isg15	0.999997	3.33339	850.05	80.6694
Trpc3	1	3.32759	1290.08	126.909
Rin2	1	3.32704	8298.68	816.576
Gimap9	0.999414	3.32382	3426.83	248.517
Phf3	0.999975	3.3224	15843.8	1509.98
Zfp41	0.999345	3.31952	6637.61	476.936
Tmem44	0.999492	3.31674	14246.8	981.919
Kmt2a	0.999073	3.31596	10954.1	856.277
Atp2b1	1	3.31538	20655.5	2039.15
Ddx51	0.999039	3.31527	4021.32	314.816
Ewsr1	1	3.31232	23227.1	2320.33
Terf1	0.999547	3.31079	2903.91	246.646
Gm14391	0.998474	3.30541	4313.28	321.234
Lzts1	0.999468	3.30427	4671.59	343.374
Gzf1	0.998904	3.30198	9235.9	651.808
Pdia5	0.999283	3.30018	8414.11	551.598
Gcc2	1	3.29757	4980.68	504.777
Agrn	1	3.29702	23013.9	2327.97
Gatad2b	1	3.29339	8359.85	833.076
Samd12	0.999667	3.2881	8318.63	704.494
Wasf2	1	3.28711	26272.5	2687.89
Gimap4	0.999803	3.28416	2477.79	212.003
Inpp5f	0.999997	3.28168	6646.51	656.036
Hnrnpr	1	3.27905	11574.2	1156.74
Cplane1	0.985065	3.27754	4013.18	378.591
Lrwd1	1	3.27668	4234.13	435.862
Lfng	0.99798	3.27566	1533.04	146.32
Gtf2ird1	0.999999	3.27511	5248.51	521.755
Entpd1	1	3.27479	16440.3	1645.84
Abcf1	0.99946	3.27336	15751	1536.08
Zfp820	0.999377	3.27302	2376.74	175.73
E330009J07Rik	1	3.27232	4035.3	416.592
Zfp871	0.997985	3.27068	29764.5	2267.02
Helz	0.998437	3.26746	16622.3	1232.02
Zc3h4	0.998616	3.26743	6471.44	574.086
Cmpk2	0.999665	3.26606	2493.14	204.063
Gon4l	0.999897	3.26203	7156.12	661.413
Zfp318	1	3.26038	3486.13	352.362
Igf1r	0.999487	3.25834	96829.9	9615.98
Zfp982	0.991383	3.2563	1129.36	107.961
Fryl	0.999999	3.25516	29008.8	2933.01
Fmo5	1	3.24842	2145.68	224.965
Zeb1	0.998175	3.24523	35876.6	2829.39
Gbf1	0.999981	3.2438	12697.6	1284.57
Acin1	1	3.2422	6928.6	730.704
Cdadc1	1	3.23997	1885.3	198.946
Lyst	0.980632	3.2314	7182.11	692.355
Zfp236	1	3.2279	6076.63	643.185
Ndufa10	0.999729	3.22571	20208.5	1917.97
Bsdc1	1	3.22543	8455.6	899.167
Washc2	0.998844	3.22359	19199.3	1651.81
Tek	1	3.21981	41251.4	4403.7
Baz2b	1	3.21654	8586.82	901.269
Acsl3	1	3.21417	4281.04	459.694
Ankhd1	1	3.21265	10452.5	1100.65
Kdm6b	1	3.21164	2165.96	230.471
Chn2	1	3.20959	3210.36	344.611
Nisch	0.998524	3.20935	39172.2	3977.15
Ubn1	0.999743	3.19902	12779.8	1252.68
Zfp362	0.999999	3.19613	2349.58	247.542
Glul	1	3.18391	63155.7	6926.32
Phf21a	0.987787	3.18179	2671.92	268.049
Gse1	0.990032	3.17404	2716.51	275.712
Lhfpl2	1	3.1647	6576.94	725.769
Mill2	0.998901	3.16306	3322.59	345.213
Nampt	1	3.15197	23746.2	2612.11
Adh1	0.99908	3.14446	731.455	66.021
Naa35	0.999738	3.14182	6728.7	667.824
Kazn	0.995257	3.13888	929.297	97.1634
Jmjd8	0.9997	3.13006	5794.47	581.931
Kmt5b	1	3.12926	8243.15	939.438
Tnrc6b	0.998956	3.12061	6174.9	611.983
Fmnl3	0.999504	3.11323	18390.9	1894.02
Cep350	0.999977	3.11248	7799.02	863.254
D430042O09Rik	0.998371	3.10971	3173.39	308.145
Ppp1r9b	0.999536	3.10541	19229.4	2120.03
Gm28048	1	3.0999	3388.81	388.968
Myh9	1	3.09884	342624	39107.6
Cd59a	1	3.09468	8442.16	974.699
Afdn	0.958089	3.0884	41733	4450.31
Pnpla6	1	3.08818	10486.4	1201.57
Atf7	1	3.08371	9609.24	1129.44
Reep1	0.997416	3.08315	3780.55	316.567
Synpo2	0.997495	3.08191	6935.1	610.77
Zfp106	0.995636	3.0777	23327.4	2283.49
Zfp937	1	3.06578	1490.31	172.222
Elmsan1	0.995991	3.06379	9469.61	787.868
Sbf2	1	3.06338	17699.2	2065
Ubr3	0.962653	3.06207	15131.7	1663.51
Shroom1	1	3.05899	8734.13	1038.44
Arid4b	1	3.05678	5489.78	642.869
Cutal	0.998735	3.05609	2487.34	220.12
Plcb1	1	3.04814	9439.11	1134.31
Maob	1	3.04125	1945.5	230.309
Tbx3	0.999997	3.04002	5708.68	669.65
Adcy6	0.996567	3.03797	9429.92	907.275
Thoc2	1	3.03759	9394.76	1124.15
Mier1	0.995194	3.03732	9914.2	1006.63
Fam189a2	1	3.03709	1776.51	211.08
Numa1	1	3.02717	18988.8	2266.74
Extl3	1	3.02202	26445.1	3224.28
Rapgef4	0.999054	3.02111	6615.22	607.72
Pdxk	1	3.02056	12132.6	1484.67
Hnrnpa3	0.991327	3.01977	22890.8	2233.97
Usp32	0.98174	3.01943	7000.51	797.27
Brd7	0.99818	3.01913	6407.52	675.769
Tnrc18	0.99625	3.01906	12273.7	1209.49
Rgcc	0.999767	3.01504	1806.17	193.454
Acvr2b	1	3.0144	650.214	79.6834
Sipa1	0.995609	3.00429	23549.7	2368.09
Fam193a	1	3.00155	4417.02	540.995
Adgrg1	0.996979	2.99959	26110.3	3078.08
Hsp90b1	1	2.99713	57739.2	7187.63
Luc7l3	1	2.98834	4676.05	587.889
Bpgm	0.998354	2.98664	3822.27	422.213
Snrnp70	0.999975	2.98621	8516.12	1032.2
Syt15	0.999806	2.98476	2072.46	219.972
Ddit4	0.999613	2.97954	4064.46	491.018
Fam98b	0.997301	2.9783	2518.44	251.342
Spen	1	2.97645	7151.2	905.675
Tbl1xr1	1	2.96765	17985.3	2297.49
Phf20	0.999581	2.96576	8639.85	1054.38
Rtp4	0.981774	2.96501	1474.77	171.332
Prpf38b	1	2.96419	4605.73	577.802
Grk2	0.994826	2.96262	24408.2	2451.96
Sipa1l2	0.999174	2.95964	14279.1	1731.72
Zfp513	0.996432	2.95907	3121.45	291.706
Lrrcc1	0.997028	2.95821	4382.02	422.473
Rsf1	0.999063	2.95504	4884.08	598.546
Bcl9l	0.967314	2.95428	2655	313.072
Hsp90ab1	0.987975	2.94897	115988	14154.6
Cep250	0.999981	2.94517	5102.51	635.532
Ppil4	1	2.94299	4653.39	601.959
Smarcc2	1	2.94229	14738.7	1913.91
Kdm5d	0.997097	2.93427	3257.57	394.57
Clip1	1	2.93185	17894.5	2338.81
Gucy1b1	1	2.93181	1253.01	163.29
Zfp74	0.99777	2.93079	2714.02	293.191
Kdm2b	0.994096	2.92707	5973.15	549.866
Tns2	0.999974	2.92549	12000.8	1521.13
Cbl	1	2.92487	13015.2	1706.73
Nbr1	1	2.92202	23249.6	3044.5
A630089N07Rik	0.999647	2.91443	572.454	66.3208
Casp8ap2	0.999998	2.91405	3854.76	495.003
Zfp62	0.998241	2.91158	5358.58	597.382
Hira	0.99702	2.90108	3020.63	338.035
Rrbp1	0.999999	2.89927	18367.2	2382.18
Tcf7l2	0.996716	2.89796	2926.61	284.047
Tpcn1	0.999988	2.89603	4816.72	625.533
Rgl1	0.997555	2.89271	10469.5	1191.79
Paxbp1	0.998619	2.89148	3365.33	341.944
Frrs1	0.999518	2.88977	2449.73	298.073
Prkcd	0.995488	2.88908	5680.89	555.392
Ppfia1	0.998219	2.88782	13725.3	1754.59
Stard9	1	2.88772	5742.98	770.725
Rtf1	0.996722	2.88499	4175.92	495.251
Bod1l	1	2.88376	5545.58	737.858
Lrp6	0.999987	2.88074	18986.3	2501.61
Iqsec1	1	2.87469	5510.21	736.917
Nr1d1	0.996277	2.86441	6541.49	848.337
Glcci1	0.997812	2.86044	2723.97	317.159
Ly6c1	1	2.86021	87335.4	11948.7
C130074G19Rik	1	2.86021	31793.1	4350.19
Rev1	0.997398	2.86008	4525.1	540.756
Bcar3	0.995887	2.85958	7320.67	707.475
Ppp1r13b	0.995368	2.85701	15771.4	1829.52
Gm49359	0.984206	2.85352	1591.22	202.61
Slc39a8	1	2.85208	9625.9	1332.61
Sh3bgr	1	2.85173	240.939	32.8272
Adi1	0.999124	2.85064	1956.46	241.483
Apc	1	2.85024	14873.1	2039.08
Dok4	1	2.84901	4417.15	608.882
Cir1	0.99663	2.84519	1593.45	209.115
Tet2	1	2.84469	2555.46	347.539
St3gal6	0.99898	2.84446	19318.7	2561.04
Ldlrad3	1	2.843	7968.33	1091.86
Ylpm1	0.999232	2.84278	5212.61	652.772
Rnf38	0.997099	2.8418	7067.66	932.859
Srrm1	1	2.84103	5198.63	723.808
Zcchc17	0.991219	2.84027	5890.48	770.655
Bbs9	1	2.83945	1758.29	243.938
Cntrl	1	2.83718	1841.29	254.117
Snurf	1	2.83085	32.3154	4.36632
Zfp652	0.999985	2.82803	7672.04	1046.55
Dennd5b	0.992163	2.82791	14769.8	1531.49
Uaca	1	2.82672	24850.7	3480.78
App	0.977716	2.82554	145507	19207.8
Nebl	1	2.82451	13576.5	1903.84
Ttbk2	0.998521	2.82417	2573.14	346.216
Usp42	1	2.82312	2460.91	344.557
Phf2	0.999988	2.81967	5697.83	782.142
Chd3	0.99615	2.819	10535.5	1248.22
Dek	1	2.81772	7697.27	1075.49
Ddx23	0.996666	2.80565	7064.73	959.323
Rnf220	0.995477	2.80555	7924.44	945.78
Cntln	1	2.80515	2331.39	329.114
Ptk2	0.984495	2.80398	35712.3	3629.89
Morf4l1	1	2.80362	32935.3	4704.21
Lsr	0.999652	2.80175	14980.2	2053.16
Msh2	0.994806	2.80153	5666.05	637.948
Clstn1	0.999078	2.79856	31689.2	4345.16
Col4a3bp	1	2.78973	22108.4	3190.05
Phip	0.995169	2.7859	12245.3	1472.42
Ssbp3	0.990896	2.78146	5618.04	591.435
Thrap3	0.999986	2.77932	15185.5	2139.99
Myo6	1	2.77643	11926.7	1733.19
Sun1	0.987499	2.77478	21504.3	2462.53
Aldh2	1	2.77119	17534.4	2566.25
Kdr	0.999977	2.7706	76139.2	10802.2
Appl2	0.979011	2.76886	1975.46	266.363
Tsc22d1	1	2.76856	50948.1	7352.89
Hivep1	0.986932	2.76477	8786.71	1121.43
Bsg	1	2.76458	171742	25097.4
Myo10	0.996267	2.76333	73028.7	9664.27
Fbxo11	0.999968	2.76074	6148.95	879.317
4930522L14Rik	0.996555	2.75808	1548.83	189.282
Nfic	1	2.74832	13951.5	2062.77
Nrde2	0.995801	2.74757	3430.27	411.385
Mmp28	0.979051	2.74722	4462.65	615.599
Ddx3x	0.99568	2.74447	65582	9346.29
Nrp1	0.999838	2.72939	24726.8	3580.93
Arhgef3	1	2.72752	8590.12	1288.8
Anks1	0.9925	2.7265	7998.03	1010.36
Zmiz1	0.995697	2.72573	17478	2338.91
Kidins220	0.992101	2.71868	21601.2	3090.93
Socs4	0.982242	2.71722	10453.2	1302.92
Zmym2	0.993367	2.71713	10118.3	1343.15
Limch1	0.995415	2.71649	29747	3871.77
Taf4	1	2.71624	1434.86	215.117
Mccc1	0.952882	2.71267	1342.66	187.238
Capn15	1	2.7124	2791.99	418.48
Mapk8ip3	0.999807	2.7116	4670.65	685.322
Rnf31	0.987623	2.71089	5078.27	657.445
Gtf3c6	0.985175	2.71058	6322.01	688.565
Drosha	1	2.70577	7375.05	1126.66
Zfp715	1	2.7028	3752.43	575.574
Scrn3	0.981542	2.69976	1501.25	215.516
Mmp15	0.997311	2.69887	3284.5	435.065
Prr14l	1	2.69112	6701.63	1023.4
Lgals3bp	0.999919	2.6905	5797.36	861.771
Macf1	1	2.68717	116482	18011.9
Tnfsf12	1	2.68676	1968.69	304.965
Hdac7	0.983353	2.68672	13750.4	2010.11
Ift81	0.962983	2.67331	1107.43	157.364
Pbx1	1	2.67124	5392.99	829.3
Stk24	0.999949	2.66839	6718.3	1027.31
Ncbp2	1	2.6666	3561.2	552.367
Slc2a1	1	2.66503	215676	33510
Tob1	1	2.65795	10688.9	1681.4
Mbd5	0.994427	2.65676	5413.56	772.25
Apod	0.9905	2.6486	7069.57	874.096
Haus3	1	2.64798	2224.38	346.94
Nrm	0.996288	2.64497	1228.07	166.054
Arhgap18	0.96744	2.64279	4784.4	702.141
Utp14b	0.999999	2.63647	1967.12	308.788
Fam172a	0.983728	2.63615	8154.36	979.367
Tfdp2	1	2.63539	3992.26	635.218
Tubgcp5	0.990378	2.63537	4154.96	595.347
Serhl	0.994467	2.63448	3549.52	495.38
Jag2	1	2.63192	14147.8	2240.87
Gja4	0.9924	2.62988	2562.17	339.61
Xrn1	0.99999	2.6298	5004.62	787.733
Polk	1	2.629	12292.5	1943.83
Eps8l2	0.993284	2.62842	7228.89	1099.55
Dkc1	0.989048	2.6246	4332.34	556.052
Ulk1	0.986342	2.62327	5825.89	750.334
Arid4a	1	2.6215	4190.26	679.344
Idh2	0.999976	2.61649	2795.76	440.728
Miga1	0.978357	2.616	4956.3	604.171
Evi5l	1	2.61388	2234	360.776
Ppp1r7	0.973732	2.6107	7585.96	1045.19
Nol7	0.982844	2.60452	8954.23	1159.91
Jmjd1c	1	2.60294	12375.8	2011.57
Gbp9	1	2.60285	5836.83	944.989
Rdm1	0.998587	2.60049	1743.12	259.22
Exosc7	0.993197	2.59979	3009.04	429.166
Stat1	1	2.59958	10352.5	1672.34
Kif26a	0.999948	2.59936	30732.7	4901.25
Dnajc7	0.999947	2.5917	5864.17	943.304
Ssx2ip	0.996459	2.59118	4300.4	636.723
Akt3	1	2.58842	11251.3	1847.04
Map4	0.998058	2.58452	54404.6	8697.01
Senp7	1	2.5837	1056.36	176.02
Plxdc2	0.98851	2.57998	6125.07	762.072
Ccp110	1	2.5778	1940.38	324.174
Epb41l2	0.97766	2.57723	16363.9	2331.43
Mga	1	2.57389	9037.48	1494.78
Acvr1	0.98514	2.57215	7716.2	1105.8
Chd4	1	2.5719	20226.1	3349.19
Vps13d	0.977718	2.56987	13882	1997.18
Zmynd11	1	2.56886	12596.5	2110.91
Enpp2	0.980066	2.56868	9388.72	1464.47
Fcgrt	1	2.56798	14874.1	2493.42
Ktn1	1	2.56676	9855.54	1657.73
Kat6a	1	2.56426	9263.34	1556.28
Arhgef2	0.999702	2.5638	17011.2	2786.19
Trim33	0.998923	2.56246	5552.22	902.047
Kansl1	0.985382	2.55926	9779.76	1467.84
Chd1	0.979931	2.55717	10034.4	1607.26
Abl1	0.971153	2.55078	10323.5	1379.73
Iigp1	1	2.55052	1383.07	232.027
Zfp93	0.997061	2.54905	1286.62	209.062
R3hcc1l	0.991505	2.54672	4222.19	681.916
Apbb2	1	2.54492	28484.7	4830.34
Mcc	1	2.54442	12603.1	2155.13
Lbh	0.957181	2.54137	1862.12	297.517
Rbm25	1	2.53722	6629.71	1138.01
Ing2	1	2.52845	999.296	171.03
Aldh9a1	0.999984	2.52723	4612.41	779.236
Gripap1	0.999998	2.52706	2096.29	354.537
Iqcg	0.990153	2.52455	1902.13	282.041
Twf1	0.998261	2.52179	13420.2	2249.18
Paqr5	0.996412	2.52039	8029.51	1259.83
Fnip2	0.968984	2.51822	12756.7	1703.64
Upf3b	0.999971	2.51795	986.547	167.069
Slc7a1	0.979528	2.51731	39848.4	6636.46
Pdzd2	0.97162	2.51714	4527.73	739.724
Usp48	1	2.51707	5119.66	890.084
Pdgfrb	1	2.51582	5426.89	937.594
Echdc1	0.979594	2.51489	5016.91	657.677
Mif4gd	1	2.51368	3115.28	532.94
Mia2	0.990775	2.50292	4466.33	698.181
Rufy1	1	2.50199	4428.13	778.131
Zic2	1	2.49608	3911.26	683.161
Bbx	0.968978	2.49539	6764.06	1125.77
Tcirg1	0.986373	2.49529	8719.02	1066.61
Sptan1	0.998205	2.49372	137851	23527.3
Hmgxb4	0.999813	2.49296	2259.74	387.384
Zcchc14	0.98988	2.49148	6940.38	1094.73
Rbbp6	1	2.48903	4124.77	721.523
Stmn2	0.999996	2.48824	2590.85	452.332
Dnmt3a	0.977558	2.48685	6660.01	892.764
Epc2	0.995178	2.48441	3688.34	629.417
Trip11	1	2.48431	6661.17	1187.02
Dstyk	1	2.48267	4021.81	718.839
Fnbp1	0.999998	2.48196	1858.29	326.312
Cc2d1b	0.986969	2.47475	4705.67	717.63
Crispld1	1	2.47446	2506.47	448.512
Sos2	1	2.47256	6677.16	1201.61
Adam17	1	2.47179	13173.1	2370.64
Map4k4	1	2.47094	41279	7398.8
Zfp37	1	2.46906	967.935	174.053
Cd2ap	1	2.46594	22333.8	4019.57
Erc1	1	2.4659	10426.8	1877.25
Slco2b1	0.999999	2.45804	11915.5	2115.82
Dpp4	0.999877	2.45694	1825.55	321.626
Eif4enif1	0.99225	2.45651	3473.08	603.705
Psmc3ip	0.999729	2.45566	660.183	116.515
Tmem140	1	2.45528	4199.33	757.802
Taf1a	0.992393	2.44826	1328.61	192.74
Tbc1d30	1	2.44704	1599.9	290.849
Ssrp1	0.981232	2.44325	15936.7	2588.6
Ncl	0.999513	2.44315	24409.6	4369.86
Pik3r3	1	2.44205	6361.85	1158.4
Adgrl2	0.986789	2.43244	18977	3338.79
Usp28	0.995269	2.42895	777.28	137.526
Klf7	1	2.4282	9192.82	1705.5
Aspscr1	0.999982	2.42573	4888.55	888.205
Map4k2	1	2.4246	10060.2	1866.64
Ube2r2	0.999967	2.42227	10605.9	1929.79
Rad50	0.986367	2.42211	2635.97	441.76
Ino80d	1	2.41797	5960.72	1103.69
Uty	0.997943	2.41507	1817.76	324.505
R3hdm1	0.999985	2.41234	3413.44	625.996
Mtmr1	0.965491	2.41159	6391.71	944.77
Zic3	0.968736	2.41144	7136.63	1259.74
Synm	1	2.41102	13550.6	2507.7
Tln1	1	2.41084	61512.2	11440.9
Inpp5b	0.999317	2.41081	3866.66	702.494
Nbdy	1	2.4095	4169.25	769.113
Zfp36	0.960434	2.40655	7757.15	1253.9
Fam76a	0.992933	2.40639	10308.4	1852
Rad1	0.979329	2.40504	2462.34	338.037
Usp33	0.969195	2.40105	8697.43	1347.05
Sin3a	0.973962	2.40039	4281.58	694.403
Cdk5rap3	0.973285	2.39946	4244.28	622.411
Plcb4	0.997304	2.39572	15542.5	2816.58
Atp10a	1	2.3938	13268.9	2521.12
Dlc1	1	2.39322	15490.9	2933.19
Zfp40	0.994301	2.39227	1037.64	173.605
Layn	1	2.39191	3398.67	641.045
Cic	0.999995	2.3888	3193.01	597.432
Faim	1	2.38546	3258.14	617.121
Nipbl	1	2.38351	9457.57	1798.62
Smarcd1	0.97317	2.38276	2390.91	402.579
Qk	1	2.38146	63753.6	12086.8
Hnrnpa2b1	1	2.38128	26191.4	4982.98
Ppm1h	0.999999	2.38075	3424.01	644.763
Impdh1	0.959316	2.37899	13706.3	2198.82
Evl	1	2.37888	2297.05	437.23
Kras	0.975646	2.3787	9823.46	1668.77
Slmap	0.99636	2.37837	8930.92	1654.27
Phf1	0.998453	2.37672	1875.17	346.424
Mpzl1	0.99807	2.37597	22346.4	4149.1
Als2cl	0.972549	2.3737	10085.1	1440.47
Cthrc1	0.999952	2.36945	1187.64	223.178
Cpsf1	1	2.36827	5941.44	1147.08
Pdcd4	1	2.36472	4775.18	920.482
Ttll5	1	2.36421	988.745	191.656
Ptms	1	2.36211	8597.9	1656.49
Mettl3	0.981383	2.36207	2218.65	348.774
Zfp68	0.982648	2.362	7977.65	1329.17
Npnt	0.955765	2.35663	3390.56	531.241
Pcdh12	0.984112	2.35647	5531.16	926.667
Bnip3l	0.999974	2.35583	22136.3	4226.51
Dcun1d3	0.961367	2.35578	7821.37	1339.38
Ubr5	0.999988	2.35008	20380.1	3918.58
Ncor2	1	2.34952	5936.75	1155.86
Max	0.996879	2.34941	6833.91	1290.33
Rtl8c	1	2.34734	290.732	56.4795
Foxn3	1	2.34689	7906.22	1531.11
Dennd3	1	2.34667	7585.26	1467.06
Chmp3	1	2.34622	17477.8	3405.35
2019-09-04	1	2.34398	7115.05	1391.72
Zfp597	0.987956	2.34275	3457.99	603.695
Cdk19	1	2.34221	8270.47	1628.57
Irf1	0.991786	2.34207	5975.7	1033.42
Erlec1	0.983918	2.34129	1859.24	328.205
Prex1	0.963991	2.33847	7309.69	1156.12
Kdm2a	1	2.33802	8796.1	1736.91
Hdac5	1	2.33721	4546.01	898.855
Depdc5	1	2.33506	1413.11	279.121
Ccdc137	0.959407	2.33475	4581.15	681.097
Srcap	1	2.32962	9457.61	1872.26
Mef2a	0.993164	2.32909	17011	3261.5
Add3	0.993708	2.32255	12290.1	2350.23
Ciz1	0.984476	2.32175	2903.79	518.375
Ets1	0.950418	2.32152	66902.8	12649
Mxi1	1	2.32123	3026.08	597.291
Phpt1	0.962016	2.31842	2866.18	427.312
Fance	0.970401	2.31731	1824.55	268.601
Zbtb20	1	2.3168	18577.4	3691.07
Pabpn1	1	2.31211	4503.86	894.993
Mecp2	0.990883	2.31121	5848.44	1126.79
Dync1h1	0.996035	2.31096	70701.3	13763.7
Acsf2	1	2.3106	872.469	174.596
Fto	0.981285	2.30979	7588.13	1379.18
Baz2a	1	2.30891	7219.07	1436.58
Tatdn3	0.959879	2.30652	1265.22	194.078
Grb2	1	2.30357	6055.28	1217.14
Nfatc1	0.956182	2.30306	5349.27	1021.94
Eif2ak4	0.979859	2.30091	3267.72	626.308
Atxn7	0.955992	2.29683	4777.08	916.03
Pou2f1	1	2.29431	2974.06	601.503
Brd4	1	2.29019	6317.21	1274.44
Atp2c1	0.999995	2.2878	15151.9	3037.18
Prdm16	1	2.28548	1559.23	314.358
Pmpcb	0.961383	2.28452	9353.09	1641.27
2510009E07Rik	1	2.28437	6040.94	1229.24
Ubn2	0.999862	2.28366	2924.67	585.462
Taf3	0.99981	2.28101	1947.7	390.473
Ypel3	0.999599	2.27991	2839.13	565.629
Gbp3	1	2.27975	3773.89	772.172
Mtmr11	0.979592	2.2756	7177.53	1284.91
Limd1	0.99583	2.27503	7789.47	1554.78
Oas1a	0.999427	2.27475	1806.95	360.255
Esf1	1	2.27188	2227.75	457.123
Ppp2r5e	0.959465	2.26768	5639.12	1044.42
Dhx9	0.96346	2.26696	11512.4	2152.41
Rasgrp3	1	2.26678	29103.4	6011.42
Retreg1	0.981834	2.26328	1788.95	322.403
Parp1	0.950398	2.26278	8445.61	1379.78
Slc7a5	0.999999	2.26022	55344.2	11350.3
Tcerg1	1	2.25865	3002.65	625.471
Nf2	1	2.25614	9553.75	1970.29
Upf2	0.996117	2.24729	2960.26	603.271
Bdp1	0.984476	2.24339	4990.28	1009.01
Hip1	1	2.24134	21506.4	4522.15
Ttc3	1	2.23917	8377.73	1757.34
Zfp180	1	2.23823	3005.68	632.77
Pcbp2	0.980595	2.23333	12336.2	2506.66
Svil	0.993506	2.22234	7485.78	1543.16
Hnrnph1	1	2.22194	10733.8	2282.87
Ep400	0.951869	2.22086	7450.9	1419.5
Srsf4	1	2.21872	2782.38	593.328
Tpra1	0.999301	2.21822	3577.42	745.359
Scaf11	0.999996	2.21732	10484.3	2214.31
Ambra1	0.95621	2.21589	4399.84	810.208
Qser1	0.986091	2.21559	5749.34	1188.3
Aplp2	1	2.20981	81470.5	17355.8
Tmcc3	1	2.20645	4571.59	983.596
Sf1	0.998972	2.20615	8958.26	1884.06
Fam192a	1	2.20495	3453.91	737.682
Mindy1	1	2.2015	9321.45	2013.18
Myo1b	1	2.19985	29872.8	6499.73
Ik	1	2.19356	6801.02	1468.18
Brd2	0.999999	2.19329	15065.9	3243.52
Elk3	1	2.19306	11198	2443.57
Ipo8	0.95374	2.19196	9902.22	1946.52
Lamb2	1	2.19119	39263.9	8564.46
Crebrf	0.981587	2.19059	6183.19	1290.7
Mrs2	0.999834	2.18837	6465.27	1388.02
Usp53	0.999992	2.18613	7696.38	1658.92
Grrp1	0.982024	2.18568	372.948	76.5224
D3Ertd254e	1	2.1821	1806.35	396.915
Zfp423	1	2.18153	2245.99	490.758
Mfap1a	0.999993	2.18024	6073.8	1317.74
Mysm1	1	2.17908	3595.64	788.674
Nudc	1	2.17823	6649.08	1465.02
Prdm2	1	2.17782	4302.51	939.308
Zfp212	0.994064	2.17754	2265.56	482.093
Zfp950	0.999991	2.17113	1353.52	293.395
Abr	1	2.16861	6138.67	1363.45
Pan3	1	2.16389	6016.43	1335.02
Iqce	0.999994	2.16318	1000.56	219.213
Nod1	0.99776	2.16304	5961.35	1286.48
Herc1	0.998402	2.16133	13487.9	2926.47
Tnik	0.999991	2.15999	1425.16	313.52
Eif2ak2	0.972831	2.1597	4440.31	866.691
Vps13c	1	2.15966	4656.88	1028.06
Sec63	0.999758	2.15878	10494	2300.19
Lig1	1	2.15716	1032.57	229.016
Itpr3	1	2.15685	19279.1	4278.38
Hdgfl2	1	2.15609	4444.17	989.36
Mycbp2	0.998187	2.15477	8371.34	1828.7
Gpatch8	1	2.15292	3912.38	871.695
Edc3	0.974136	2.15057	2186.91	469.895
4932438A13Rik	1	2.14943	5760.51	1292.87
Dnajc13	1	2.14745	7563.58	1698.6
Pdf	0.950788	2.14274	2096.77	381.017
Hp1bp3	0.999986	2.14101	10662.1	2367.11
Grasp	1	2.13864	4529.63	1017.13
Yeats2	1	2.13631	2633.57	594.474
Ankrd12	0.998982	2.13379	4123.82	913.353
Tmem86a	0.97787	2.13359	1108.25	223.743
Mrtfb	1	2.13184	14631.8	3307.74
Rabgap1	0.980975	2.12985	10885.1	2388.6
St6gal1	1	2.12623	6212.47	1420.76
Tbccd1	0.970388	2.12586	1064.39	231.626
Rnf214	1	2.1255	2095.44	476.044
Trim34a	0.986101	2.12505	2161.3	423.374
Mllt6	1	2.12292	4442.42	1011.85
Paf1	1	2.12184	3827.22	875.683
Trim25	1	2.12066	4752.14	1087.74
Cnot1	0.999994	2.11478	14277.1	3245.07
Tmtc1	1	2.114	5837	1330.75
Stx4a	0.971071	2.11348	2409.1	531.718
Baz1b	1	2.11148	12854.8	2960.21
D5Ertd579e	1	2.10947	6366.34	1464.72
Ddx5	1	2.10795	47367.3	10888.8
Rsrp1	1	2.10654	4272.43	988.885
Jcad	1	2.10573	113899	26205.9
Wbp11	0.972264	2.10545	3981.03	885.706
Foxo4	1	2.10511	1418.15	327.118
Stag1	1	2.10157	9968.13	2314.19
Brwd1	1	2.09915	9638.19	2245.86
Zfp46	0.967477	2.09605	3520.55	787.267
Commd4	0.986058	2.09426	2780.03	627.044
Gatc	1	2.09286	1581.64	368.674
Marf1	1	2.09247	5188.84	1207.63
Phf14	1	2.08914	3743.97	876.337
Copg2	0.976918	2.08788	7909.93	1787.82
Ralgapa1	0.999983	2.08705	14047	3243.59
Ripor1	1	2.08105	11154.3	2604.06
Khsrp	1	2.07999	6736.3	1583.31
Dop1b	0.998325	2.07899	2658.8	610.616
Il10rb	0.999965	2.07364	7414.08	1725.16
Cdc14a	0.998463	2.07221	953.182	218.895
Birc6	1	2.06789	17845.5	4205.19
Pds5b	0.997917	2.06669	5621.76	1301.86
Dgcr8	0.99944	2.06653	4363.96	1017.64
Pik3r1	0.999888	2.06445	5472.47	1282.53
Vsir	0.955974	2.06355	11415.7	2258.52
Sesn1	1	2.06342	5956.96	1415.97
Mapre3	0.965785	2.06304	1406.5	320.612
Son	1	2.06278	23309.9	5553.81
Rbm5	0.999999	2.05973	8051.12	1900.89
Pick1	1	2.0575	786.097	187.638
Selenop	1	2.05444	167836	39790.2
Wdr43	1	2.04831	6154.44	1485.92
U2surp	0.996158	2.04663	6080.56	1422.24
Ago1	0.999914	2.04462	3762.65	897.206
Zfp865	1	2.04212	1198.27	290.5
Slx4	1	2.04177	893.264	214.754
Mettl7a1	0.985179	2.04065	1029.16	237.271
Trim12c	1	2.04065	1881.64	452.054
Fam181b	0.98397	2.04046	1582.81	345.976
Arhgap21	1	2.03715	5406.78	1305.65
Jmy	1	2.03374	5177.75	1249.54
Suds3	1	2.03359	5987.25	1461.95
Gab1	1	2.02883	6279.13	1522.23
Vps37b	0.954866	2.02423	2098.04	460.522
Tlk1	0.999397	2.02218	5207.04	1256.37
Zfp758	1	2.02122	1274.42	312.143
Klf9	1	2.01726	12379.3	3044.66
Glod4	1	2.01477	5760.36	1416.24
Ppfibp1	0.951561	2.01256	30808	7315.26
Smox	1	2.01042	2726.27	675.636
Dynll2	1	2.01003	2478.65	611.009
Ncoa4	0.999712	2.00972	14884.5	3622.72
Spice1	1	2.00832	614.337	150.516
Arhgef12	0.997312	2.00702	43362.6	10522.6
Ocln	1	2.00179	20848.2	5160.64
Zhx1	0.992102	1.99971	10235.9	2481.76
Herc2	0.976862	1.99592	28343.7	6847.38
Armcx1	1	1.99587	1914.31	474.262
Lmo7	0.999994	1.99198	7399.91	1828.28
Lyar	1	1.98788	1973.92	497.404
Neurl4	0.990435	1.98739	1938.33	472.751
Clcn6	0.999801	1.98688	1648.64	407.702
Denr	1	1.98187	3941.18	991.918
Serpinb9	1	1.98074	4948.68	1246.15
Crtc2	0.999902	1.98065	1856.59	461.64
Bhlhe40	1	1.97722	13423.6	3370.2
Pabpc1	0.99989	1.97695	22688.4	5670.05
Tlk2	0.998211	1.97631	5453.76	1351.87
Rnf167	0.954936	1.97273	2471.46	551.069
Ramp2	0.998166	1.97113	11361	2809.43
Lrch3	1	1.97057	7168.83	1821.39
Tab2	0.999986	1.96977	6962.42	1754.24
Snx27	0.99647	1.96394	4757.11	1190.57
Txlng	0.956651	1.95612	1554.22	357.935
Reck	1	1.95397	3396.56	875.531
Gabbr1	0.997428	1.94677	1242.98	312.68
Slfn3	0.9964	1.94398	1612.22	408.174
Hey1	0.997952	1.94348	3527.82	884.956
Rsrc2	1	1.94173	3826.07	985.463
Xpo6	0.999966	1.93753	6782.14	1742.72
Fbrsl1	0.999937	1.93673	1757.91	450.721
Dnal1	1	1.93202	1082.74	282.145
Sipa1l3	1	1.93174	3098.06	808.983
Snai2	0.999969	1.92966	701.975	181.451
Dab2	0.998317	1.92638	8773.33	2251.34
Sos1	0.999971	1.92536	5588.05	1450.13
Nek1	0.999983	1.92507	1188.17	307.971
Chd7	0.998483	1.92317	4033.74	1036.07
Zfp160	0.98918	1.92245	1312.81	333.979
Mettl14	0.992122	1.91916	1247.41	320.477
Nck1	0.999972	1.91667	6444.08	1677.36
Mphosph8	1	1.91531	1525.72	402.889
Rif1	0.974653	1.91486	5121.2	1312.93
Tet3	1	1.91346	4156.36	1098.46
Phc1	0.999938	1.91282	1395	364.728
Ptprb	1	1.9116	101876	26984.2
Gm47283	0.972846	1.91045	774.173	198.471
Rhot2	1	1.90799	2233.38	594.019
Kiz	0.952188	1.90745	1240.9	315.585
Gltp	0.999999	1.90447	15173	4001.28
Hnrnpd	0.999999	1.9034	4196.23	1108.33
Setd5	1	1.90183	7592.63	2013.66
Ddhd1	0.993087	1.90022	1595.48	415.513
Oxr1	1	1.89925	6303.25	1684.44
Usp18	0.991004	1.89876	1030.97	265.396
Brd9	1	1.89775	2151.67	575.715
Tspan13	0.999999	1.89449	16725.3	4436.28
Maoa	1	1.89184	20393.4	5462.96
Itsn1	1	1.89159	2531.13	675.068
Itpkb	1	1.89082	8999.37	2413.42
Vwa5a	0.992699	1.88679	13587.3	3567.31
Kansl1l	0.99888	1.88289	1857.82	490.805
Pcgf3	0.986994	1.88018	7578.34	2008.63
Phc3	1	1.87877	5490.76	1482.91
Cbx4	1	1.87486	1046.08	284.99
Akap8	0.950949	1.87213	4490.78	1177.26
Whamm	0.996253	1.87091	1173.74	312.096
Akt2	0.984746	1.87044	4094.89	1086.54
Dnm2	1	1.86885	15428.3	4208.39
Deaf1	1	1.86624	678.82	185.161
Spag9	1	1.86516	23189.3	6312.99
Bhlhb9	0.993455	1.86388	1726.77	461.397
Nin	1	1.86367	3774.97	1025.37
Retreg3	0.992111	1.86318	9251.89	2476.44
Ubtf	0.999258	1.86273	7784.88	2099.88
Baiap2	1	1.85988	1830.55	498.628
Tns1	1	1.85945	42553.4	11689.3
Polg	0.999998	1.85764	6944.41	1893.63
Rapgef3	0.985759	1.85209	8817.53	2352.56
Bfar	1	1.85051	2811.63	776.37
Vmac	0.996658	1.8466	2169.57	587.274
Tcp11l2	0.999156	1.84646	1531.53	415.595
Zfp65	0.999996	1.84643	846.07	231.907
Dach1	1	1.84466	2133.93	590.695
Luc7l2	1	1.84301	7259.68	2008.1
Zfpm1	1	1.84232	2167.58	603.494
Tfeb	1	1.84206	1731.19	478.176
Cep83	0.997699	1.84054	1395.61	380.777
Golgb1	0.999949	1.83617	8110.65	2232
Magi1	0.998036	1.83393	3494.55	956.696
Pde2a	0.987765	1.83263	58360.3	15907.7
Stk4	1	1.82823	4769.17	1336.9
Ccdc174	1	1.82778	1319.51	370.431
Eif5b	0.999999	1.82754	4032.53	1125.2
Nav1	1	1.82745	7594.39	2135.71
Rnf20	1	1.82619	6832.85	1909.41
Ppp6r3	1	1.82597	14306.2	4025.37
Tpr	0.965074	1.82467	8760.69	2386.16
Sfpq	0.955107	1.82306	7511.62	2054.75
Tnrc6c	0.99996	1.82205	4418.78	1230.38
Nfya	0.999803	1.82181	2457.9	685.49
Ttyh2	0.999852	1.82041	6234.76	1735.79
Hnrnpu	0.983377	1.81929	31527.6	8703.92
Aftph	0.999911	1.81897	5174.43	1444.2
Parp14	1	1.81858	4255.43	1197.48
Gatad2a	0.999955	1.81777	14470.6	4049.51
Wdr11	1	1.81591	4840	1371.53
St5	1	1.81089	1930.84	547.969
Fnbp4	1	1.81006	1840.38	517.924
Taf9b	1	1.80863	2834.26	807.544
Zswim8	0.999989	1.80732	7126.81	2011.19
Gapvd1	1	1.80412	11735.4	3343.44
Cspp1	0.965874	1.80396	1069.91	294.523
Zfp60	1	1.79834	1379.88	394.909
Ube2l6	1	1.79834	2445.77	698.652
Hmg20a	0.963219	1.79628	2234.17	622.689
Hsph1	0.999845	1.79451	2632.45	747.955
Qars	0.989085	1.79393	4333.82	1220.52
Kdm3b	0.998177	1.79389	3974.82	1124.25
Zfp326	1	1.79161	881.932	254.296
Amd1	1	1.78482	10813.1	3108.14
Nrd1	1	1.78471	18466.1	5341.7
St6galnac2	0.999996	1.77281	4581.96	1321.9
Dgka	1	1.77205	2332.39	676.502
Usf2	1	1.76065	2258.61	660.682
Cadm1	0.992956	1.76033	3166.44	914.621
Atp6v0e2	1	1.7595	2956.15	864.535
Zfp809	0.999953	1.75765	1225.49	357.183
Trim21	1	1.7561	893.381	262.689
Rgs12	1	1.75226	8208.84	2431.92
Nktr	1	1.75072	3093.88	911.856
Ilf3	0.992758	1.75046	3054.16	888.075
Ptpn12	1	1.7488	6169.6	1825.83
B4galt5	1	1.74666	5005.05	1486.57
Polr3gl	0.998289	1.74635	1056.89	307.816
Pradc1	0.999224	1.74621	391.921	114.6
Fkbp4	0.99967	1.74584	4755.2	1394.32
Pdxdc1	0.967493	1.74452	10570.3	3063.27
Nudt16	0.98531	1.74424	1038.58	299.783
Apmap	0.999999	1.74216	4973.66	1470.07
Atf2	0.999988	1.7396	3898.62	1153.57
Bend5	0.952941	1.73913	449.977	129.205
Lrba	0.99987	1.73872	5446.9	1609.29
Cgnl1	1	1.73867	34202.6	10182.8
Pfkm	0.989486	1.73856	2559.63	745.98
Zmynd8	0.999997	1.73705	2597.88	770.195
Slc9a3r2	0.999649	1.73566	20273.2	5974.8
Braf	1	1.73459	5416.81	1618.45
Gstk1	0.999846	1.73455	855.193	252.743
Dnaja1	1	1.73157	13808.9	4124.47
Arsk	1	1.72815	773.942	232.485
Alkbh8	0.999623	1.72581	1524.9	454.355
Cdc40	1	1.72459	1748.46	526.352
Recql	1	1.72442	830.284	248.796
Larp7	0.999967	1.72437	1396.05	416.091
Sesn3	0.992167	1.72281	2864.22	849.182
Akr1c14	0.958289	1.72202	13869.8	4022.22
Rpl22l1	0.997582	1.72031	1526.06	453.104
Ptprm	1	1.71879	21188.6	6385.33
Ccdc82	0.998689	1.71613	4748.39	1415.06
Ccnk	0.991794	1.71461	995.133	296.631
Uri1	0.998681	1.71337	3303.21	988.425
Nkapd1	1	1.71288	1458.41	444.03
Anp32b	0.999907	1.7126	7124.89	2148.69
Inafm1	0.99474	1.71193	1031.34	307.78
Rab4a	0.993478	1.71184	990.171	295.385
Zfp146	1	1.70973	1709.52	518.212
Zfp157	1	1.70973	1079.38	328.748
Plxnd1	0.995682	1.70915	14967.7	4473.49
Kdm7a	0.979983	1.70878	4336	1297.16
Gbp2	0.999985	1.7072	5893.07	1774.58
Acsl1	1	1.70496	2034.32	622.904
Ccdc85a	1	1.70036	3580.75	1097.82
Rdx	0.999977	1.70024	23297.5	7078.62
Tmem204	0.999775	1.7001	10127	3056
Cbll1	0.999868	1.69978	1222.83	371.182
Arid2	0.999584	1.69814	4526.71	1374.83
Tut7	0.999	1.6979	6845.52	2073.01
Tspan18	0.999174	1.69619	2052.21	620.556
2310033P09Rik	1	1.69516	470.339	144.36
Specc1l	1	1.69365	9578.42	2944.09
Cwf19l2	1	1.69013	1279.36	394.103
Htatsf1	1	1.68968	3998.37	1238.6
Ash1l	0.999996	1.68291	7080.21	2183.93
Myo9a	0.998352	1.68236	6209.33	1906.41
Mdm4	1	1.68216	3099.65	961.073
Mindy2	0.999183	1.6817	10964	3356.38
Rnf216	0.993215	1.67857	2976.35	910.326
Rbbp5	1	1.67381	3115.04	973.882
Prpf4b	1	1.6703	4363.93	1360.13
Cacfd1	1	1.67024	1304.66	406.716
Cep57	0.999999	1.66934	1290.46	401.694
Hmgn1	0.999975	1.66894	13842.8	4308.61
Zfp131	1	1.66831	2910.42	911.226
Scmh1	0.998841	1.66655	3699.57	1144.43
Klhl5	1	1.66387	14748.3	4633.48
Vamp4	0.996287	1.66368	1967.11	607.986
Klf2	0.999775	1.6625	7078.29	2202.18
Mpdz	0.954911	1.66224	3949.81	1209.06
Unc45b	0.977168	1.66193	1270.87	389.213
Hexim1	0.971533	1.66047	1948.37	601.368
D16Ertd472e	1	1.65877	1025.5	324.428
Smc3	0.999997	1.65722	4338.78	1362.7
Ppm1g	0.998879	1.65617	7419.52	2319.47
Cast	1	1.65044	11999.1	3802.07
Npepps	1	1.64956	3034.62	962.957
Agtpbp1	1	1.64836	2733.35	868.026
Wfdc1	0.999999	1.64751	4081	1285.79
Peli1	1	1.64629	4554.36	1452.91
Ccdc66	0.971149	1.64563	1314.97	408.641
Focad	1	1.64427	2273.85	726.83
Dnajc8	0.999014	1.64395	9711.09	3057.35
Bmi1	1	1.64366	6781.18	2155.05
Os9	1	1.63893	9273.17	2971.67
Gbe1	0.988401	1.63603	5658.51	1778.86
Ccpg1	1	1.63077	5235.7	1686.77
Msi2	0.993165	1.62659	9917.02	3133.2
Mat2a	0.989499	1.62641	14829.9	4700.71
Gid8	0.999151	1.61989	1900.14	608.926
Eif4g3	1	1.61986	5145.51	1671.48
Phactr2	1	1.61921	10057.9	3256.47
Cxcl12	1	1.61744	117092	38025.8
Sfswap	1	1.61643	2367.89	768.442
Bmx	0.961858	1.61222	1495.32	468.308
Pcm1	0.965097	1.60925	4116.55	1316.67
Gimap1	1	1.60811	4797.5	1564.32
Serbp1	0.989594	1.60743	20220.4	6515.49
Gnptab	0.999997	1.60737	1827.12	594.166
Rrm2b	0.999548	1.60165	2638.63	857.982
Wdr44	0.999999	1.60001	1409.62	461.772
Cnot6	1	1.59589	8414.13	2765.04
Arhgap17	0.999865	1.59569	2353.15	769.252
Eml3	1	1.59564	2835.63	934.9
Myrip	0.999989	1.59394	3418.95	1117.21
Snd1	1	1.59178	9862.21	3268.12
Gpr146	1	1.59058	7319.04	2423.02
Ints6	0.999996	1.58995	3000.89	987.871
Tgfbr3	0.999582	1.58557	6529.8	2145.89
Spry1	0.999999	1.58515	1001.3	330.437
Samhd1	1	1.58455	4072.15	1352.71
2310061I04Rik	0.999953	1.58299	499.715	165
Hgs	0.999996	1.58247	2049.02	678.376
Zc3h13	0.992785	1.58207	4394.28	1441.33
Zdhhc17	1	1.58156	1932.11	644.249
Sp110	0.990343	1.58033	1096.33	358.449
Def6	0.998677	1.57979	3003.31	988.832
Eif4b	1	1.57933	11767.5	3926.63
Wipi1	0.996193	1.57875	3013.13	989.463
Nipsnap2	0.999975	1.57811	3650.11	1208.61
Kin	1	1.57768	825.155	274.826
Thada	1	1.57361	2041.33	682.968
Camsap1	0.999979	1.57155	2065.37	688.377
Ctnnb1	0.999134	1.56972	89565.2	29684.5
Mbtd1	0.996164	1.56922	859.93	284.819
Cwc22	0.994965	1.5691	1620.9	536.498
Mapk3	1	1.56584	10009.8	3370.28
Sema6d	0.955208	1.56525	4896.89	1597.09
Casp2	0.996683	1.56466	2647.48	879.014
Ebf1	1	1.56361	9045.77	3050.76
Map3k7	0.999969	1.56314	6208.93	2078.96
Ncaph	0.998054	1.56002	922.417	305.986
Sp4	0.999993	1.55967	1842.96	619.903
Rabgap1l	1	1.55665	3159.9	1068.13
Supt6	0.999468	1.54757	6322.78	2138.79
Caskin2	1	1.54638	5153.05	1762.79
Shprh	0.999279	1.54389	2762.67	935.916
Ints13	1	1.54288	2057.2	703.591
Bclaf1	0.998325	1.54182	8136.93	2747.35
Rtl8a	0.983013	1.541	6468.31	2170.94
Fbrs	0.996971	1.54096	1984.14	672.813
Nolc1	1	1.53883	2068.92	709.577
Ivns1abp	0.999985	1.53585	8620.32	2940.07
Gsta4	0.999973	1.5333	842.015	287.362
Ubxn7	0.996463	1.53018	4784.61	1634.56
Rilpl1	1	1.52709	2328.77	803.306
Dido1	0.995371	1.52632	4362.86	1490.95
Ubr4	0.990429	1.52532	14901	5100.05
Esam	1	1.522	78802.7	27397.9
Dnajb9	1	1.52099	3964.24	1373.66
Atp11c	1	1.51956	5567.62	1927.79
Tmc7	1	1.51746	2203.62	767.434
Ddrgk1	1	1.51359	3727.93	1303.86
Cpt2	0.999712	1.51359	1877	649.288
Cdkn1b	0.962681	1.51302	2337.7	797.863
Zfp970	1	1.51238	532.422	185.126
Slc6a8	0.999996	1.51204	2552.09	888.127
Abcf3	1	1.51151	3849.67	1349.15
Itprid2	1	1.50649	8421.05	2954.07
Nr3c1	1	1.50495	10386.1	3652.61
Cdc73	0.999993	1.50465	4110.61	1436.32
Rrp1	1	1.50339	9077.83	3191.4
Iqgap1	0.999967	1.50318	27971.8	9788.47
Ahctf1	0.999028	1.50233	7320.07	2552.91
Ubap2l	0.99807	1.49978	8023.05	2798.74
Numb	0.992141	1.49911	4041.67	1402.52
Ubqln2	1	1.49881	2774.21	977.682
Srek1	1	1.49843	1499	527.352
Gpbp1	0.987378	1.49832	8441.92	2934.08
Btbd7	0.997741	1.49829	11897.4	4153.22
Ipo9	0.977532	1.49615	9308.68	3238.18
Cep63	0.999943	1.49315	1189.44	417.514
Patl1	1	1.49167	2301.08	814.82
Nop53	0.999538	1.48987	6664.31	2344.96
Igbp1	0.99993	1.48862	3594.19	1265.7
Zfp292	0.999995	1.48649	4614.21	1633.62
Wasl	1	1.48488	5330.16	1895.97
Lpcat3	1	1.48205	4155.29	1480.05
Ranbp9	0.999044	1.48178	6034.37	2133.24
Fas	0.977935	1.48034	1147.86	401.105
2310057M21Rik	0.999288	1.4779	956.056	340.057
Ccdc47	0.995095	1.47788	8205.45	2908.75
Rock1	0.999484	1.47535	9358.63	3332.27
Naa16	0.996127	1.4726	759.157	269.871
Synrg	0.999446	1.4715	2746.85	980.347
Srsf11	0.999998	1.46933	4312.31	1545.4
Rbm39	0.994291	1.4692	15930.9	5645.92
Cd40	0.999999	1.46328	509.441	183.208
Cox7b	0.994467	1.46256	7118.56	2546.95
Mtpap	1	1.46123	3151.67	1143.2
Cep120	1	1.46052	2460.66	891.436
Sap18	1	1.45899	3477.15	1260.78
Ccng2	0.988008	1.45599	2878.41	1030.12
Fkbp15	0.999944	1.45471	3510.87	1267.8
Cmtm8	1	1.45402	923.614	335.973
Pccb	1	1.45024	1074.92	393.229
Samd8	0.999942	1.44949	3038	1103.53
Slc35a1	1	1.44812	2653.36	971.985
Prpf3	0.999999	1.4401	992.212	363.544
Arhgef15	1	1.43977	5791.79	2126.39
Cbx1	0.97244	1.43971	2419.47	875.899
Sik1	0.982517	1.43792	8483.38	3081.85
Mark2	0.998346	1.43315	2895.35	1058.67
Arrdc1	1	1.42981	1207.32	446.833
Tcf4	0.996482	1.42792	33574.6	12312.7
Nfatc3	0.989094	1.42757	5210.7	1910.73
Nemf	0.953066	1.42689	2694.41	976.653
Atxn2l	0.995614	1.42661	3657.69	1343.03
Dctn6	1	1.42416	2503.07	928.71
Kif2a	0.981328	1.42319	2438.63	893.605
Kif1bp	0.999108	1.4218	2416.31	891.532
Lrpap1	1	1.42128	8403.5	3119.63
Rabep1	0.999994	1.42126	5489.94	2033.56
Trim56	0.998964	1.42082	4756.37	1756.7
Sgms1	0.999705	1.41753	27415.4	10158.9
Cwc27	1	1.41675	1187.21	442.981
Stmn1	0.997082	1.41254	4941.07	1827.61
Crtc3	0.982243	1.40958	1816.28	671.944
Irgm2	1	1.40858	1696.29	636.687
Hacd2	0.953968	1.40841	1959.67	722.913
Wac	0.996131	1.40488	4933.95	1842.32
Maco1	0.999919	1.40459	3302.68	1236.3
Top1	0.958901	1.39896	4400.33	1639.53
Smarcc1	1	1.39846	2600.37	982.786
Unc50	0.997685	1.39819	4111.02	1536.78
Eps15l1	0.999974	1.39757	3307.42	1245.47
Plcg1	0.99948	1.39208	13940.5	5247.72
Asxl2	0.984894	1.39079	2076.57	779.894
Gsk3b	0.974501	1.38784	6580.2	2480.52
Dtx3l	1	1.38741	2415.44	918.34
Ric1	0.994557	1.38288	4314	1632.66
Arhgap31	1	1.37481	26964	10346.8
Nme3	0.961401	1.37341	418.97	158.147
Foxp1	0.982006	1.37289	10495.8	3995.82
Gabpa	1	1.37177	3715.05	1433.22
Tbc1d17	1	1.37091	2982.95	1149.49
Elf2	1	1.36889	5752.28	2222.17
Slu7	1	1.36839	4188.5	1618.46
Insr	0.999915	1.3683	12491.7	4795.84
Arel1	0.999902	1.36702	3417.45	1314.36
Arglu1	0.999925	1.36329	2730.28	1050.05
Sox13	1	1.35978	4622.73	1795.72
Zbtb18	0.999932	1.35755	1231.42	476.87
Sema7a	0.999951	1.35753	21917	8489.15
Sil1	0.9908	1.35684	3533.7	1354.39
Stat3	0.998348	1.3552	8547.57	3300.74
Ccrl2	0.999696	1.35516	1252.76	482.937
Setd3	1	1.34813	9910.2	3888.83
Csnk1g2	0.999502	1.34675	8419.56	3275
Kmt5a	0.975901	1.34624	2418.31	935.946
Slc1a1	0.999956	1.34505	12646.6	4932.02
Mpp7	1	1.34239	1707.55	672.678
Phldb2	0.958197	1.34157	7358.16	2856.13
Ppp2r5a	0.999996	1.34123	15283.9	5986.11
Parg	0.998696	1.341	3256.57	1271.03
2019-09-09	1	1.33455	4641.4	1833.97
Wiz	0.999989	1.33094	1536.91	606.768
Erg	0.998596	1.32942	21611.3	8510.78
Anapc13	0.999949	1.32148	1112.16	441.585
Rbbp9	0.999993	1.32134	1334.02	529.959
Map7d1	0.999997	1.32093	11728.1	4664.04
Ski	1	1.32011	10049.9	4011.27
Tbc1d5	1	1.31863	1327.5	531.497
Ddx19a	0.988043	1.31783	2622.73	1040.65
Ahcyl2	1	1.3165	2828.92	1132.59
Spr	0.987997	1.31257	2452.16	972.539
Pon2	0.999756	1.31086	8788.69	3508.39
Pcnx3	0.999986	1.31001	2811.67	1126.85
Stard4	1	1.30762	3405.24	1375.15
Zfp943	0.996651	1.30402	926.726	369.952
Ywhae	0.952337	1.30317	20583.1	8230.35
Zfp451	0.998848	1.30037	3078.42	1237.76
Nfkb1	0.999338	1.2987	8212.02	3299.22
Fam133b	0.999482	1.29537	1052.66	424.017
Bag6	0.999958	1.2947	5613.61	2275.03
Mal	0.985474	1.29345	11535.5	4632.58
Arap3	0.996668	1.28996	10246.3	4140.99
Shld1	0.953568	1.28916	474.468	190.16
Ubap1	1	1.28896	3307.7	1348
Med15	0.967653	1.28845	3069.18	1238.09
Rusc1	1	1.2841	1618.92	663.224
Reep3	1	1.2808	13434.4	5513.64
Spast	0.991744	1.27878	3125.04	1271.03
Supt20	1	1.27384	1818.88	751.663
Syf2	0.999998	1.27238	5017.66	2063.61
Ifnar1	1	1.2704	15980.6	6604.5
Gpatch11	0.999916	1.26966	1099.26	452.645
Use1	0.999907	1.26822	2761.53	1136.31
Serpinb6b	1	1.25491	1756.5	731.542
Pnrc2	0.999999	1.24699	4931.15	2066
Pir	0.978568	1.24614	1305.99	541.534
Rasal2	0.991092	1.24392	7885.4	3296.89
Kbtbd7	0.985788	1.24302	1304.21	543.772
Ezh1	1	1.24275	4735.61	1993.75
Slc25a45	0.998892	1.24197	1157.2	482.459
Clk2	1	1.24076	798.768	337.464
Pkn2	0.987782	1.23754	8572.28	3592.09
Ppp1r21	1	1.23482	911.105	386.243
Selenok	0.993567	1.2322	5400.19	2274.72
Sipa1l1	1	1.23091	2453.67	1043.03
Brd8	0.998838	1.22425	2378.07	1007.04
Rbm26	0.957557	1.22226	2028.19	856.165
Dock1	1	1.2219	11439.8	4884.68
Ppwd1	0.994658	1.22108	655.478	278.491
Atp8b2	1	1.21755	3426.67	1468.75
Tpt1	0.987093	1.21479	46663.2	19907.7
Med23	0.999995	1.2072	1856.98	800.186
Cttn	0.982249	1.20621	16540.7	7084.77
Golm1	0.97163	1.20327	4204.88	1801.04
Fgd5	1	1.20041	9394.03	4080.56
C2cd2l	1	1.20017	1760.18	763.783
Bet1l	0.984915	1.19677	1659.27	715.071
4931406P16Rik	0.999997	1.19335	22716.2	9877.63
Zfp384	0.998198	1.1908	2044.48	887.602
Zfyve9	0.965518	1.19072	3605.18	1561.19
Pbrm1	1	1.18709	6879.89	3015.19
Arhgef6	0.999741	1.1864	566.383	246.542
Zbtb4	0.970678	1.1829	7301.66	3178.36
Hnrnph2	1	1.17714	5287.23	2333.98
Sbds	1	1.17477	4378.05	1938.55
2610044O15Rik8	0.999888	1.17469	729.18	320.724
Mfap1b	1	1.17114	3167.54	1405.7
Ginm1	0.999593	1.16927	7940.18	3500.07
Chka	0.99796	1.16669	1630.13	719.147
Mprip	0.998049	1.16582	29434.8	13009.6
Rarg	1	1.16499	1480.93	657.591
Nap1l1	0.999927	1.16262	8389.66	3730.15
Ptpra	0.999987	1.15788	6749.88	3009.59
Riok1	0.997879	1.15622	1832.06	814.018
Eipr1	0.980892	1.15152	1325.22	588.988
Sec62	0.99999	1.15114	8708.32	3902.21
Dock4	0.958742	1.15057	10579.7	4705.27
Cfap36	0.971293	1.1493	1693.95	754.471
Tcim	1	1.1478	526.236	236.89
Sypl	0.96449	1.14604	12533.7	5599.41
Btrc	0.999983	1.14458	1278.63	575.336
Rnf125	0.99502	1.14369	2399.78	1070.87
Rps6kb2	1	1.14289	688.388	310.979
Gtf3c5	0.957491	1.13948	1170.5	524.354
Rbmx	0.998974	1.13698	2001.99	903.977
Id1	0.999999	1.12967	8328.53	3789.8
Dennd4c	0.992594	1.12867	5849.1	2652.97
Pomp	1	1.12527	5630.7	2579.22
Rap1a	0.99804	1.12085	4931.28	2249.6
Bscl2	1	1.1203	2391.23	1097.21
Cul3	0.988	1.11855	9594.33	4374.46
Zkscan1	1	1.11813	4138.36	1901.37
Afap1l1	0.992081	1.11732	15772.8	7198.71
Sap30bp	0.986103	1.11621	2313.1	1053.24
Vps72	0.988422	1.11065	1418.76	649.632
Sash1	0.988256	1.11033	8321.88	3816.59
Terf2	1	1.1074	957.576	443.719
Fxr2	1	1.10716	3701.78	1717.65
Tsnax	0.977127	1.10466	4349.18	2001.31
Xpr1	0.99999	1.10443	7376.61	3417.46
Usp54	0.97104	1.10248	6515.01	2990.91
Naa60	0.952285	1.10066	1522.52	701.632
Tsc2	1	1.10047	3359.49	1562.62
Smarcal1	0.966333	1.09791	991.639	457.535
Kdm6a	0.999506	1.09321	3589.71	1672.51
Stom	0.999998	1.08745	6728.25	3150.78
Fer	1	1.08735	1906.16	895.924
Larp1b	0.99812	1.08549	1078.06	504.272
Clec16a	0.99998	1.08437	1590.51	746.937
Zfp148	1	1.08069	4212.37	1987.3
Ppp2r2a	0.955091	1.08014	4565.2	2132.85
Mphosph10	0.998415	1.07852	1309.8	615.421
Dennd5a	0.999388	1.07751	17385.8	8189.36
Ptpn2	0.999996	1.07647	1802.8	851.035
4930523C07Rik	1	1.07443	3372.77	1599.26
Chmp5	1	1.06712	7778.92	3705.64
Smg7	0.955017	1.06199	4557.51	2164.63
Zmym5	1	1.06179	1789.34	854.257
Ttll7	0.976608	1.05972	5486.05	2602.16
Zeb2	0.974726	1.05625	2633.42	1255.26
2410004B18Rik	0.977653	1.05512	963.143	459.042
Sgsm3	0.987784	1.05446	1158.32	552.491
Leo1	1	1.05423	1658.48	797.766
Tacc2	0.997172	1.05226	1712.91	821.233
Pik3r4	0.992019	1.05136	1649.87	789.877
Serinc5	1	1.05079	9751.52	4691.21
Eif4g1	0.99842	1.04937	19441.8	9340.57
Ssbp1	0.954231	1.04742	1293.44	618.833
Vps53	0.999931	1.04193	1733.94	837.755
Fam3c	1	1.0417	4166.76	2018.9
Tbcel	0.99996	1.04117	2795.29	1353.13
Maf1	0.996343	1.04087	4995.99	2408.57
Vps52	0.956874	1.03903	3060.9	1474.42
Wbp4	0.998748	1.03165	2121.68	1030.11
Znfx1	1	1.02993	6324.8	3087.28
Secisbp2l	0.976928	1.02884	6882.48	3348.3
Lsg1	0.999726	1.02837	1551.77	756.769
Tm7sf3	0.998779	1.02797	3381.02	1644.8
Fip1l1	0.999973	1.02483	3841.47	1880.84
Ick	1	1.02454	1691.77	830.724
Ccnl2	0.995077	1.02428	2711.28	1317.73
Rnf10	0.988886	1.02272	7096.5	3468.89
Dusp12	0.961086	1.01984	720.859	351.435
Dnase1l1	0.969831	1.01973	729.527	355.36
Tnpo3	0.998152	1.01895	6583.49	3232.54
Mtf2	1	1.01597	1562.9	770.94
Zfp790	0.999961	1.0144	1070.9	528.104
Wdfy3	1	1.01299	5290.6	2616.71
Lcorl	0.992285	1.0104	2699.39	1330.38
Plscr4	0.986845	1.00878	1199	589.061
Nptn	0.966652	1.00836	7914.53	3891.82
Dhx29	0.958646	1.00811	1664.35	819.76
Smu1	1	1.00512	5939.63	2957.35
Ireb2	0.998586	1.00319	2912.79	1444.56

## Sheet: C) Filtered adult brain EC DEG
Gene	PPDE	log2PostFC	mean_count_in_adultBrain_ECs	mean_count_in_culturedECs
Gm10718	1	14.3305	15621.9	0.170167
Car4	1	12.9754	54639.6	6.27994
Slc22a8	1	11.3275	41920.7	15.2164
Srarp	1	11.1801	2122.71	0.589046
Gm10800	1	11.1622	27574.7	6.74379
Ddc	1	11.1463	9012.1	3.66599
Serpina1b	1	10.922	1301.46	0.3887
Gm21970	1	10.8799	1620.22	0.402363
Gm10801	1	10.8498	4239.3	1.05692
Ccl21a	1	10.4418	5991.16	3.75156
Stra6	1	10.0955	2092.71	1.58758
Slco1c1	1	9.40946	246834	360.199
Notum	1	9.32445	3712.67	5.12714
Spock2	1	8.98184	197186	389.102
Axin2	1	8.68938	7252.4	15.9514
Gm21738	1	8.67943	2085.67	2.90539
Gkn3	1	8.56666	2042.56	4.82361
Hmgcs2	1	8.47582	12056.6	33.0481
Sgpp2	1	8.42739	3796.52	10.7541
Aplnr	1	8.42018	3698.11	7.52494
Slc26a10	1	8.20709	1411.51	4.32358
Tiam1	1	8.18282	24771.3	74.1437
H2-T24	1	8.0797	3018.33	10.8337
Edn3	1	7.97983	3617.85	14.0261
Slc38a3	1	7.80975	30749.5	127.148
Mfsd2a	1	7.55535	29210	131.927
Hmcn1	1	7.41391	14368.7	79.3878
Degs2	1	7.0677	4393.17	28.7779
Alpl	1	6.98228	6762.27	48.6889
Cdon	1	6.85793	25075.6	126.623
Kbtbd11	1	6.51365	17187.3	185.697
Slc38a5	1	6.46116	8894.25	87.8209
Adamtsl2	1	6.43554	2483.59	28.4303
Gpr160	1	6.41468	3916.16	30.0083
Egflam	1	6.41026	4465.43	49.7829
Slc39a10	1	6.39832	111623	1322.78
Ltbp4	1	6.15725	23746.4	322.162
Sema3c	1	6.04704	59340.9	897.109
Ndnf	1	6.01412	21526.5	327.315
Tcf7	1	5.82044	6924.9	106.701
Oasl2	1	5.677	8176.55	143.629
Itih5	1	5.64256	33819.4	652.878
Atf7ip	1	5.63648	37129.8	735.442
Zfp36l1	1	5.63517	30048.4	600.571
Ppard	1	5.58518	19618.4	268.937
Slc19a3	1	5.55214	6662.58	132.911
Pglyrp1	1	5.48233	6711.89	127.419
Dnah8	1	5.41769	6749.36	132.651
Slc6a6	1	5.38245	104478	2499.55
Fmo1	1	5.32349	2398.9	57.4688
Palmd	1	5.30335	14751.7	370.046
Klf4	1	5.27345	19005.4	491.053
Nkd1	1	5.2682	5900.95	152.823
Tnfsf10	1	5.25448	7792.48	203.855
Pde7b	1	5.23336	3879.52	89.3933
Fam13c	1	5.19218	7973.3	214.792
Zfp366	1	5.16191	36956.4	1023.12
Isyna1	1	5.15975	9557.98	266.353
Slc7a3	1	5.15222	2644.39	72.7968
Ccdc141	1	5.11845	43737.1	1213.1
Prdm1	1	5.09055	1795.68	50.0996
Abcb1a	1	5.08688	290785	8157.65
Pltp	1	5.05254	75307.4	2262.07
Pcp4l1	1	4.99879	25526.9	797.951
Golim4	1	4.98595	61323.1	1570.1
Aqp11	0.999998	4.93319	9333.04	282.775
Gbp5	1	4.916	5682.6	154.042
Efr3b	0.999991	4.89106	20624.9	635.399
Slco1a4	1	4.85862	98231.8	3317.81
Ccdc88c	1	4.85254	12002.2	275.669
Map3k1	1	4.84993	14760.2	511.198
Ceacam1	1	4.78931	9405.32	330.065
Megf6	1	4.7546	5865.76	152.235
Nfat5	1	4.73245	27184.6	885.186
Vps39	0.999996	4.70393	58456.7	1344.32
Zbed6	1	4.65732	4231.14	164.687
Flt1	1	4.652	378687	14272.6
Apcdd1	1	4.63936	112065	4275.26
Slc35f2	1	4.61535	9465.23	384.36
Slc40a1	1	4.585	44531.8	1782.54
Itm2a	1	4.55775	150944	6385.35
Lnx2	0.999997	4.52266	22332.4	703.296
Cnot6l	1	4.51512	21455.7	925.959
Adgre5	1	4.50082	23042.7	972.752
Xdh	1	4.47497	9105.86	364.813
Jarid2	1	4.43621	7627.64	350.445
Ccdc9	1	4.41742	7511.79	351.034
Scgb3a1	1	4.38386	323.531	10.973
Colgalt2	1	4.3705	2852.32	136.586
Foxq1	1	4.35882	7346.91	357.694
Slc3a2	0.999933	4.34947	118261	5378.81
Ptprg	1	4.3425	92775.6	4427.65
Ptprr	1	4.30962	2866.58	144.225
Lrp8	0.999853	4.2915	13222.4	617.617
Amot	0.999999	4.27931	19235.1	881.375
Klf3	1	4.26582	51395.5	2669.39
Mcf2l	0.999999	4.26	23520.4	1150.44
Atrx	1	4.25827	52565.4	2479.06
Lrrc49	0.999999	4.23884	8216.68	371.068
Akap9	1	4.22568	16883.6	895.262
Msrb2	0.999991	4.21874	5293.92	199.837
Trim34b	1	4.2049	721.091	38.0588
Zswim9	0.999986	4.20385	5635.93	285.772
Slc16a4	0.999997	4.16712	7912.68	411.943
Lef1	0.999981	4.14352	16952	808.573
Rasd1	1	4.12177	1389.22	76.6011
Tdrp	0.999997	4.10475	15179.9	830.729
Git2	1	4.10457	21191	1190.73
Zfp101	0.999998	4.09953	1909.54	104.21
Ifit1	1	4.08844	2788.46	161.977
Bche	1	4.07325	7187.07	425.102
Fcho2	1	4.04585	15528.8	939.447
Cobll1	1	4.04415	27828.4	1680.66
B4galt4	1	4.03663	11258.3	615.649
Tshz2	0.999856	4.03635	8702.95	487.627
Fyco1	1	4.02561	14800.7	891.583
Lmo2	1	4.02031	17908.4	1102.64
Sema6a	1	4.01814	16427	988.208
Fry	0.999946	4.00455	32611.6	1887.33
Mylpf	1	3.99817	346.172	21.0825
Pik3r6	0.999981	3.97962	6804.65	275.949
Parvb	1	3.97664	23306.4	1469.87
Snx29	0.999999	3.96548	1284.19	77.5315
Egfl8	0.999989	3.9604	1430.51	85.4601
Acacb	1	3.94869	4292.7	270.974
Gstm7	1	3.93973	1558.19	101.276
Gpcpd1	1	3.93945	41049.2	2634.83
Nostrin	0.999999	3.93917	11645.9	714.832
Nbeal2	1	3.8886	7043.86	474.837
Cyyr1	1	3.84666	20579.8	1422.18
Clec2d	1	3.83445	6702.25	467.728
Slc30a1	1	3.83062	40424.5	2840.26
Epas1	1	3.82084	240645	17006.8
Grb14	1	3.79684	3707.76	261.289
Fam13a	1	3.79154	2066.61	145.902
Hyal1	1	3.78865	3937.85	277.881
Slc5a6	1	3.78172	2606.73	186.719
Atp11b	0.999983	3.7799	17680.1	1137.74
Fnbp1l	1	3.77157	13043	918.414
Bmpr2	0.999931	3.76959	127780	8851.78
Dnm3	1	3.75216	6310.64	453.027
Gbp7	1	3.73784	11317.9	837.998
Rabl2	0.999922	3.72705	1844.08	111.266
Hnrnpm	1	3.72595	27586	2013.59
Fmo2	0.999991	3.72177	13556.2	919.332
Dock6	1	3.71517	15462.8	1135.63
Jam2	1	3.68037	18247.2	1400.48
Rad54b	1	3.66949	1564.34	117.055
Rab11fip1	1	3.65421	11118.4	873.455
Polr2a	1	3.64773	23015.9	1769.4
Ccdc186	1	3.64601	8569.51	682.707
Utrn	1	3.5961	98602.3	8117.87
Ablim1	1	3.58326	82572.9	6754.76
Marveld2	0.99981	3.58276	5606.44	363.432
Tjp1	1	3.57357	115779	9665.83
Filip1	1	3.57262	6734.75	563.684
Sp100	1	3.56049	10311.3	869.816
Cbfa2t3	0.999934	3.55986	3783.35	301.781
Slc16a1	0.991982	3.55939	60400.7	4696.35
Aldh1a1	1	3.55612	8779.28	739.993
Fut8	1	3.55225	12907.6	1098
Phactr4	1	3.53804	12477.6	1068.32
Kif13b	0.999862	3.53708	11302.2	914.395
Rassf9	0.997324	3.53119	9053.9	717.424
Traf5	1	3.52126	1290.94	111.37
Pnn	1	3.51718	6898.93	601.93
Zfp169	1	3.50028	1794.84	158.364
Arl4a	1	3.48749	10463.1	904.094
Ctcf	1	3.48731	10471.9	927.827
Clic5	1	3.4721	12168.6	1091.36
Lifr	1	3.47187	18842.6	1692.27
Tnfrsf19	1	3.46177	7132.09	644.54
Erap1	0.999531	3.45446	31050.4	2016.05
Frmd4b	0.999619	3.44877	31210.5	1988.53
Golga4	1	3.4409	14754	1323.36
Prickle1	1	3.43007	6741.1	622.313
Tbc1d14	0.999816	3.42495	8233.79	650.059
Map3k8	0.999994	3.41355	1716.84	143.8
Sptbn1	1	3.41011	449301	41302.5
C2cd3	1	3.40948	2820.11	264.723
St6galnac3	1	3.40154	6565.81	604.852
Stk38	1	3.39654	7756.64	735.387
Dcaf1	0.998812	3.39257	32095.4	2025.24
Flvcr2	1	3.38416	3738.32	355.858
Slfn5	1	3.38215	37313.3	3564.12
Podxl	1	3.38097	93943.4	8697.45
Irf7	0.999981	3.37396	1232.25	105.975
Srgap2	1	3.36678	23427.6	2269.52
Timeless	0.999996	3.36195	2364.95	219.104
Prom1	1	3.35307	94405.7	8962.6
Gpd2	1	3.34012	25069.3	2467.64
Isg15	0.999997	3.33339	850.05	80.6694
Rin2	1	3.32704	8298.68	816.576
Gimap9	0.999414	3.32382	3426.83	248.517
Zfp41	0.999345	3.31952	6637.61	476.936
Tmem44	0.999492	3.31674	14246.8	981.919
Lzts1	0.999468	3.30427	4671.59	343.374
Pdia5	0.999283	3.30018	8414.11	551.598
Agrn	1	3.29702	23013.9	2327.97
Wasf2	1	3.28711	26272.5	2687.89
Gimap4	0.999803	3.28416	2477.79	212.003
Gtf2ird1	0.999999	3.27511	5248.51	521.755
Entpd1	1	3.27479	16440.3	1645.84
E330009J07Rik	1	3.27232	4035.3	416.592
Igf1r	0.999487	3.25834	96829.9	9615.98
Zfp982	0.991383	3.2563	1129.36	107.961
Fmo5	1	3.24842	2145.68	224.965
Gbf1	0.999981	3.2438	12697.6	1284.57
Tek	1	3.21981	41251.4	4403.7
Ubn1	0.999743	3.19902	12779.8	1252.68
Glul	1	3.18391	63155.7	6926.32
Lhfpl2	1	3.1647	6576.94	725.769
Mill2	0.998901	3.16306	3322.59	345.213
Nampt	1	3.15197	23746.2	2612.11
Adh1	0.99908	3.14446	731.455	66.021
Fmnl3	0.999504	3.11323	18390.9	1894.02
Gm28048	1	3.0999	3388.81	388.968
Myh9	1	3.09884	342624	39107.6
Cd59a	1	3.09468	8442.16	974.699
Afdn	0.958089	3.0884	41733	4450.31
Pnpla6	1	3.08818	10486.4	1201.57
Zfp937	1	3.06578	1490.31	172.222
Sbf2	1	3.06338	17699.2	2065
Shroom1	1	3.05899	8734.13	1038.44
Cutal	0.998735	3.05609	2487.34	220.12
Plcb1	1	3.04814	9439.11	1134.31
Maob	1	3.04125	1945.5	230.309
Tbx3	0.999997	3.04002	5708.68	669.65
Fam189a2	1	3.03709	1776.51	211.08
Extl3	1	3.02202	26445.1	3224.28
Pdxk	1	3.02056	12132.6	1484.67
Rgcc	0.999767	3.01504	1806.17	193.454
Tbl1xr1	1	2.96765	17985.3	2297.49
Rtp4	0.981774	2.96501	1474.77	171.332
Sipa1l2	0.999174	2.95964	14279.1	1731.72
Cep250	0.999981	2.94517	5102.51	635.532
Ppil4	1	2.94299	4653.39	601.959
Clip1	1	2.93185	17894.5	2338.81
Cbl	1	2.92487	13015.2	1706.73
Casp8ap2	0.999998	2.91405	3854.76	495.003
Frrs1	0.999518	2.88977	2449.73	298.073
Ppfia1	0.998219	2.88782	13725.3	1754.59
Stard9	1	2.88772	5742.98	770.725
Lrp6	0.999987	2.88074	18986.3	2501.61
Ly6c1	1	2.86021	87335.4	11948.7
C130074G19Rik	1	2.86021	31793.1	4350.19
Slc39a8	1	2.85208	9625.9	1332.61
Dok4	1	2.84901	4417.15	608.882
St3gal6	0.99898	2.84446	19318.7	2561.04
Ldlrad3	1	2.843	7968.33	1091.86
Rnf38	0.997099	2.8418	7067.66	932.859
Dennd5b	0.992163	2.82791	14769.8	1531.49
Uaca	1	2.82672	24850.7	3480.78
Usp42	1	2.82312	2460.91	344.557
Cntln	1	2.80515	2331.39	329.114
Lsr	0.999652	2.80175	14980.2	2053.16
Col4a3bp	1	2.78973	22108.4	3190.05
Aldh2	1	2.77119	17534.4	2566.25
Kdr	0.999977	2.7706	76139.2	10802.2
Tsc22d1	1	2.76856	50948.1	7352.89
Bsg	1	2.76458	171742	25097.4
Myo10	0.996267	2.76333	73028.7	9664.27
Nfic	1	2.74832	13951.5	2062.77
Nrde2	0.995801	2.74757	3430.27	411.385
Mmp28	0.979051	2.74722	4462.65	615.599
Nrp1	0.999838	2.72939	24726.8	3580.93
Arhgef3	1	2.72752	8590.12	1288.8
Capn15	1	2.7124	2791.99	418.48
Drosha	1	2.70577	7375.05	1126.66
Zfp715	1	2.7028	3752.43	575.574
Lgals3bp	0.999919	2.6905	5797.36	861.771
Macf1	1	2.68717	116482	18011.9
Tnfsf12	1	2.68676	1968.69	304.965
Hdac7	0.983353	2.68672	13750.4	2010.11
Slc2a1	1	2.66503	215676	33510
Tob1	1	2.65795	10688.9	1681.4
Tfdp2	1	2.63539	3992.26	635.218
Jag2	1	2.63192	14147.8	2240.87
Xrn1	0.99999	2.6298	5004.62	787.733
Polk	1	2.629	12292.5	1943.83
Eps8l2	0.993284	2.62842	7228.89	1099.55
Gbp9	1	2.60285	5836.83	944.989
Rdm1	0.998587	2.60049	1743.12	259.22
Stat1	1	2.59958	10352.5	1672.34
Kif26a	0.999948	2.59936	30732.7	4901.25
Mga	1	2.57389	9037.48	1494.78
Fcgrt	1	2.56798	14874.1	2493.42
Arhgef2	0.999702	2.5638	17011.2	2786.19
R3hcc1l	0.991505	2.54672	4222.19	681.916
Apbb2	1	2.54492	28484.7	4830.34
Mcc	1	2.54442	12603.1	2155.13
Paqr5	0.996412	2.52039	8029.51	1259.83
Slc7a1	0.979528	2.51731	39848.4	6636.46
Mif4gd	1	2.51368	3115.28	532.94
Rufy1	1	2.50199	4428.13	778.131
Tcirg1	0.986373	2.49529	8719.02	1066.61
Hmgxb4	0.999813	2.49296	2259.74	387.384
Crispld1	1	2.47446	2506.47	448.512
Sos2	1	2.47256	6677.16	1201.61
Adam17	1	2.47179	13173.1	2370.64
Cd2ap	1	2.46594	22333.8	4019.57
Slco2b1	0.999999	2.45804	11915.5	2115.82
Dpp4	0.999877	2.45694	1825.55	321.626
Eif4enif1	0.99225	2.45651	3473.08	603.705
Tmem140	1	2.45528	4199.33	757.802
Pik3r3	1	2.44205	6361.85	1158.4
Adgrl2	0.986789	2.43244	18977	3338.79
Klf7	1	2.4282	9192.82	1705.5
Aspscr1	0.999982	2.42573	4888.55	888.205
Map4k2	1	2.4246	10060.2	1866.64
Ino80d	1	2.41797	5960.72	1103.69
Zic3	0.968736	2.41144	7136.63	1259.74
Fam76a	0.992933	2.40639	10308.4	1852
Atp10a	1	2.3938	13268.9	2521.12
Layn	1	2.39191	3398.67	641.045
Faim	1	2.38546	3258.14	617.121
Ppm1h	0.999999	2.38075	3424.01	644.763
Impdh1	0.959316	2.37899	13706.3	2198.82
Phf1	0.998453	2.37672	1875.17	346.424
Mpzl1	0.99807	2.37597	22346.4	4149.1
Als2cl	0.972549	2.3737	10085.1	1440.47
Pdcd4	1	2.36472	4775.18	920.482
Pcdh12	0.984112	2.35647	5531.16	926.667
Bnip3l	0.999974	2.35583	22136.3	4226.51
Max	0.996879	2.34941	6833.91	1290.33
Chmp3	1	2.34622	17477.8	3405.35
Cdk19	1	2.34221	8270.47	1628.57
Irf1	0.991786	2.34207	5975.7	1033.42
Hdac5	1	2.33721	4546.01	898.855
Ccdc137	0.959407	2.33475	4581.15	681.097
Ets1	0.950418	2.32152	66902.8	12649
Baz2a	1	2.30891	7219.07	1436.58
Nfatc1	0.956182	2.30306	5349.27	1021.94
Eif2ak4	0.979859	2.30091	3267.72	626.308
Atxn7	0.955992	2.29683	4777.08	916.03
Brd4	1	2.29019	6317.21	1274.44
Ypel3	0.999599	2.27991	2839.13	565.629
Gbp3	1	2.27975	3773.89	772.172
Mtmr11	0.979592	2.2756	7177.53	1284.91
Oas1a	0.999427	2.27475	1806.95	360.255
Rasgrp3	1	2.26678	29103.4	6011.42
Slc7a5	0.999999	2.26022	55344.2	11350.3
Nf2	1	2.25614	9553.75	1970.29
Bdp1	0.984476	2.24339	4990.28	1009.01
Hip1	1	2.24134	21506.4	4522.15
Svil	0.993506	2.22234	7485.78	1543.16
Tpra1	0.999301	2.21822	3577.42	745.359
Qser1	0.986091	2.21559	5749.34	1188.3
Mindy1	1	2.2015	9321.45	2013.18
Myo1b	1	2.19985	29872.8	6499.73
Elk3	1	2.19306	11198	2443.57
Usp53	0.999992	2.18613	7696.38	1658.92
Grrp1	0.982024	2.18568	372.948	76.5224
Mfap1a	0.999993	2.18024	6073.8	1317.74
Mysm1	1	2.17908	3595.64	788.674
Zfp212	0.994064	2.17754	2265.56	482.093
Lig1	1	2.15716	1032.57	229.016
Itpr3	1	2.15685	19279.1	4278.38
Dnajc13	1	2.14745	7563.58	1698.6
Grasp	1	2.13864	4529.63	1017.13
Mrtfb	1	2.13184	14631.8	3307.74
St6gal1	1	2.12623	6212.47	1420.76
Trim25	1	2.12066	4752.14	1087.74
Cnot1	0.999994	2.11478	14277.1	3245.07
Tmtc1	1	2.114	5837	1330.75
Baz1b	1	2.11148	12854.8	2960.21
Jcad	1	2.10573	113899	26205.9
Stag1	1	2.10157	9968.13	2314.19
Ralgapa1	0.999983	2.08705	14047	3243.59
Ripor1	1	2.08105	11154.3	2604.06
Khsrp	1	2.07999	6736.3	1583.31
Il10rb	0.999965	2.07364	7414.08	1725.16
Cdc14a	0.998463	2.07221	953.182	218.895
Birc6	1	2.06789	17845.5	4205.19
Dgcr8	0.99944	2.06653	4363.96	1017.64
Selenop	1	2.05444	167836	39790.2
Wdr43	1	2.04831	6154.44	1485.92
Trim12c	1	2.04065	1881.64	452.054
Tlk1	0.999397	2.02218	5207.04	1256.37
Zfp758	1	2.02122	1274.42	312.143
Glod4	1	2.01477	5760.36	1416.24
Ppfibp1	0.951561	2.01256	30808	7315.26
Arhgef12	0.997312	2.00702	43362.6	10522.6
Ocln	1	2.00179	20848.2	5160.64
Zhx1	0.992102	1.99971	10235.9	2481.76
Lmo7	0.999994	1.99198	7399.91	1828.28
Lyar	1	1.98788	1973.92	497.404
Serpinb9	1	1.98074	4948.68	1246.15
Crtc2	0.999902	1.98065	1856.59	461.64
Bhlhe40	1	1.97722	13423.6	3370.2
Ramp2	0.998166	1.97113	11361	2809.43
Reck	1	1.95397	3396.56	875.531
Slfn3	0.9964	1.94398	1612.22	408.174
Hey1	0.997952	1.94348	3527.82	884.956
Snai2	0.999969	1.92966	701.975	181.451
Dab2	0.998317	1.92638	8773.33	2251.34
Sos1	0.999971	1.92536	5588.05	1450.13
Nck1	0.999972	1.91667	6444.08	1677.36
Rif1	0.974653	1.91486	5121.2	1312.93
Ptprb	1	1.9116	101876	26984.2
Gltp	0.999999	1.90447	15173	4001.28
Usp18	0.991004	1.89876	1030.97	265.396
Tspan13	0.999999	1.89449	16725.3	4436.28
Maoa	1	1.89184	20393.4	5462.96
Itpkb	1	1.89082	8999.37	2413.42
Dnm2	1	1.86885	15428.3	4208.39
Spag9	1	1.86516	23189.3	6312.99
Nin	1	1.86367	3774.97	1025.37
Ubtf	0.999258	1.86273	7784.88	2099.88
Baiap2	1	1.85988	1830.55	498.628
Tns1	1	1.85945	42553.4	11689.3
Polg	0.999998	1.85764	6944.41	1893.63
Rapgef3	0.985759	1.85209	8817.53	2352.56
Vmac	0.996658	1.8466	2169.57	587.274
Dach1	1	1.84466	2133.93	590.695
Zfpm1	1	1.84232	2167.58	603.494
Tfeb	1	1.84206	1731.19	478.176
Pde2a	0.987765	1.83263	58360.3	15907.7
Stk4	1	1.82823	4769.17	1336.9
Nav1	1	1.82745	7594.39	2135.71
Rnf20	1	1.82619	6832.85	1909.41
Nfya	0.999803	1.82181	2457.9	685.49
Ttyh2	0.999852	1.82041	6234.76	1735.79
Parp14	1	1.81858	4255.43	1197.48
Gatad2a	0.999955	1.81777	14470.6	4049.51
Wdr11	1	1.81591	4840	1371.53
Taf9b	1	1.80863	2834.26	807.544
Gapvd1	1	1.80412	11735.4	3343.44
Ube2l6	1	1.79834	2445.77	698.652
Nrd1	1	1.78471	18466.1	5341.7
St6galnac2	0.999996	1.77281	4581.96	1321.9
Dgka	1	1.77205	2332.39	676.502
Trim21	1	1.7561	893.381	262.689
Rgs12	1	1.75226	8208.84	2431.92
Ptpn12	1	1.7488	6169.6	1825.83
B4galt5	1	1.74666	5005.05	1486.57
Pradc1	0.999224	1.74621	391.921	114.6
Nudt16	0.98531	1.74424	1038.58	299.783
Bend5	0.952941	1.73913	449.977	129.205
Cgnl1	1	1.73867	34202.6	10182.8
Slc9a3r2	0.999649	1.73566	20273.2	5974.8
Braf	1	1.73459	5416.81	1618.45
Akr1c14	0.958289	1.72202	13869.8	4022.22
Ptprm	1	1.71879	21188.6	6385.33
Uri1	0.998681	1.71337	3303.21	988.425
Nkapd1	1	1.71288	1458.41	444.03
Anp32b	0.999907	1.7126	7124.89	2148.69
Zfp146	1	1.70973	1709.52	518.212
Zfp157	1	1.70973	1079.38	328.748
Gbp2	0.999985	1.7072	5893.07	1774.58
Ccdc85a	1	1.70036	3580.75	1097.82
Tmem204	0.999775	1.7001	10127	3056
Arid2	0.999584	1.69814	4526.71	1374.83
Tspan18	0.999174	1.69619	2052.21	620.556
Specc1l	1	1.69365	9578.42	2944.09
Cacfd1	1	1.67024	1304.66	406.716
Cep57	0.999999	1.66934	1290.46	401.694
Scmh1	0.998841	1.66655	3699.57	1144.43
Klhl5	1	1.66387	14748.3	4633.48
Klf2	0.999775	1.6625	7078.29	2202.18
Unc45b	0.977168	1.66193	1270.87	389.213
D16Ertd472e	1	1.65877	1025.5	324.428
Ppm1g	0.998879	1.65617	7419.52	2319.47
Cast	1	1.65044	11999.1	3802.07
Wfdc1	0.999999	1.64751	4081	1285.79
Peli1	1	1.64629	4554.36	1452.91
Focad	1	1.64427	2273.85	726.83
Bmi1	1	1.64366	6781.18	2155.05
Gbe1	0.988401	1.63603	5658.51	1778.86
Gid8	0.999151	1.61989	1900.14	608.926
Phactr2	1	1.61921	10057.9	3256.47
Cxcl12	1	1.61744	117092	38025.8
Bmx	0.961858	1.61222	1495.32	468.308
Gimap1	1	1.60811	4797.5	1564.32
Cnot6	1	1.59589	8414.13	2765.04
Eml3	1	1.59564	2835.63	934.9
Myrip	0.999989	1.59394	3418.95	1117.21
Gpr146	1	1.59058	7319.04	2423.02
Spry1	0.999999	1.58515	1001.3	330.437
Samhd1	1	1.58455	4072.15	1352.71
Zc3h13	0.992785	1.58207	4394.28	1441.33
Sp110	0.990343	1.58033	1096.33	358.449
Def6	0.998677	1.57979	3003.31	988.832
Nipsnap2	0.999975	1.57811	3650.11	1208.61
Ctnnb1	0.999134	1.56972	89565.2	29684.5
Mapk3	1	1.56584	10009.8	3370.28
Casp2	0.996683	1.56466	2647.48	879.014
Map3k7	0.999969	1.56314	6208.93	2078.96
Ncaph	0.998054	1.56002	922.417	305.986
Caskin2	1	1.54638	5153.05	1762.79
Rtl8a	0.983013	1.541	6468.31	2170.94
Nolc1	1	1.53883	2068.92	709.577
Ivns1abp	0.999985	1.53585	8620.32	2940.07
Rilpl1	1	1.52709	2328.77	803.306
Ubr4	0.990429	1.52532	14901	5100.05
Esam	1	1.522	78802.7	27397.9
Atp11c	1	1.51956	5567.62	1927.79
Tmc7	1	1.51746	2203.62	767.434
Cpt2	0.999712	1.51359	1877	649.288
Itprid2	1	1.50649	8421.05	2954.07
Nr3c1	1	1.50495	10386.1	3652.61
Iqgap1	0.999967	1.50318	27971.8	9788.47
Numb	0.992141	1.49911	4041.67	1402.52
Btbd7	0.997741	1.49829	11897.4	4153.22
Patl1	1	1.49167	2301.08	814.82
Nop53	0.999538	1.48987	6664.31	2344.96
Igbp1	0.99993	1.48862	3594.19	1265.7
Fas	0.977935	1.48034	1147.86	401.105
2310057M21Rik	0.999288	1.4779	956.056	340.057
Naa16	0.996127	1.4726	759.157	269.871
Cd40	0.999999	1.46328	509.441	183.208
Mtpap	1	1.46123	3151.67	1143.2
Fkbp15	0.999944	1.45471	3510.87	1267.8
Cmtm8	1	1.45402	923.614	335.973
Slc35a1	1	1.44812	2653.36	971.985
Arhgef15	1	1.43977	5791.79	2126.39
Sik1	0.982517	1.43792	8483.38	3081.85
Arrdc1	1	1.42981	1207.32	446.833
Tcf4	0.996482	1.42792	33574.6	12312.7
Nfatc3	0.989094	1.42757	5210.7	1910.73
Rabep1	0.999994	1.42126	5489.94	2033.56
Trim56	0.998964	1.42082	4756.37	1756.7
Sgms1	0.999705	1.41753	27415.4	10158.9
Irgm2	1	1.40858	1696.29	636.687
Smarcc1	1	1.39846	2600.37	982.786
Plcg1	0.99948	1.39208	13940.5	5247.72
Dtx3l	1	1.38741	2415.44	918.34
Arhgap31	1	1.37481	26964	10346.8
Foxp1	0.982006	1.37289	10495.8	3995.82
Elf2	1	1.36889	5752.28	2222.17
Insr	0.999915	1.3683	12491.7	4795.84
Sox13	1	1.35978	4622.73	1795.72
Sema7a	0.999951	1.35753	21917	8489.15
Stat3	0.998348	1.3552	8547.57	3300.74
Slc1a1	0.999956	1.34505	12646.6	4932.02
2019-09-09	1	1.33455	4641.4	1833.97
Erg	0.998596	1.32942	21611.3	8510.78
Ddx19a	0.988043	1.31783	2622.73	1040.65
Spr	0.987997	1.31257	2452.16	972.539
Pon2	0.999756	1.31086	8788.69	3508.39
Stard4	1	1.30762	3405.24	1375.15
Nfkb1	0.999338	1.2987	8212.02	3299.22
Fam133b	0.999482	1.29537	1052.66	424.017
Arap3	0.996668	1.28996	10246.3	4140.99
Shld1	0.953568	1.28916	474.468	190.16
Reep3	1	1.2808	13434.4	5513.64
Ifnar1	1	1.2704	15980.6	6604.5
Use1	0.999907	1.26822	2761.53	1136.31
Serpinb6b	1	1.25491	1756.5	731.542
Pir	0.978568	1.24614	1305.99	541.534
Ezh1	1	1.24275	4735.61	1993.75
Slc25a45	0.998892	1.24197	1157.2	482.459
Dock1	1	1.2219	11439.8	4884.68
Ppwd1	0.994658	1.22108	655.478	278.491
Tpt1	0.987093	1.21479	46663.2	19907.7
Cttn	0.982249	1.20621	16540.7	7084.77
Golm1	0.97163	1.20327	4204.88	1801.04
Fgd5	1	1.20041	9394.03	4080.56
4931406P16Rik	0.999997	1.19335	22716.2	9877.63
Zfp384	0.998198	1.1908	2044.48	887.602
Sbds	1	1.17477	4378.05	1938.55
Ginm1	0.999593	1.16927	7940.18	3500.07
Riok1	0.997879	1.15622	1832.06	814.018
Dock4	0.958742	1.15057	10579.7	4705.27
Sypl	0.96449	1.14604	12533.7	5599.41
Rnf125	0.99502	1.14369	2399.78	1070.87
Id1	0.999999	1.12967	8328.53	3789.8
Dennd4c	0.992594	1.12867	5849.1	2652.97
Pomp	1	1.12527	5630.7	2579.22
Afap1l1	0.992081	1.11732	15772.8	7198.71
Fer	1	1.08735	1906.16	895.924
Chmp5	1	1.06712	7778.92	3705.64
Serinc5	1	1.05079	9751.52	4691.21
Znfx1	1	1.02993	6324.8	3087.28
Ccnl2	0.995077	1.02428	2711.28	1317.73
Dusp12	0.961086	1.01984	720.859	351.435
Dnase1l1	0.969831	1.01973	729.527	355.36
Zfp790	0.999961	1.0144	1070.9	528.104
Plscr4	0.986845	1.00878	1199	589.061
Dhx29	0.958646	1.00811	1664.35	819.76
Smu1	1	1.00512	5939.63	2957.35

## Sheet: D) Cultured brain EC DEG
Gene	PPDE	log2PostFC	mean_count_in_adultBrain_ECs	mean_count_in_culturedECs
Kcnf1	1	-11.4452	0	2203.58
Gm2000	1	-11.1486	1.92985	5989.52
Sphk1	1	-10.7467	0.106321	1540.41
Gtse1	1	-10.6472	0	1277.64
Gdf15	1	-10.5667	0	1206.52
Tnc	1	-10.5484	27.2361	39923.5
Thbs1	1	-10.5438	126.385	188434
4930486L24Rik	1	-10.5421	0	1168.44
Arhgap22	1	-10.5236	0	1175.85
Psrc1	1	-9.80056	0	711.372
Pbp2	1	-9.62044	0	594.8
Hmga2	1	-9.61686	6.91855	5721.62
Orai2	1	-9.48474	1.45201	1609.95
S100a6	1	-9.41894	62.0136	42687.7
Serpine1	1	-9.3247	266.563	157234
Plpp2	1	-9.31755	6.02811	4274.12
Dusp5	1	-9.15126	7.10127	4439.35
Flnc	1	-9.05855	13.9619	7210.81
Ngf	1	-9.03453	0	415.865
Smpd3	1	-9.02086	5.50216	3238.28
Lgals3	1	-8.86488	3.74407	2088.96
Eda2r	1	-8.77857	11.8404	5539.8
F3	1	-8.74671	6.90331	3126.84
Lgals1	1	-8.74353	44.7158	18947.2
Pgf	1	-8.72108	89.3311	37329.3
Gfpt2	1	-8.69516	6.99254	3125.05
Basp1	1	-8.61093	3.10407	1498.52
Sdcbp2	1	-8.60934	24.5172	9876.35
Hist1h2ad	1	-8.60747	0	308.413
Ahnak2	1	-8.58461	4.14016	1859.33
Ulbp1	1	-8.54357	28.2519	10660.8
Hist1h1b	1	-8.16258	0	225.062
S100a11	1	-8.12411	57.2733	14968.4
2200002D01Rik	1	-7.97252	11.3659	3017.01
Frzb	1	-7.96509	34.2448	8551.32
Rundc3b	1	-7.95427	2.62632	842.018
Npy	1	-7.93373	2.22326	709.516
Slc16a3	1	-7.88024	25.636	5946.75
Clic6	1	-7.78298	23.1828	5073.05
Timp1	1	-7.77739	15.0536	3367.35
Phgdh	1	-7.76494	21.2963	4484.26
Cebpb	1	-7.66938	6.83976	1473.07
Cd109	1	-7.66488	13.185	2837.01
Ttc9	1	-7.58908	50.9672	9804.8
Anln	1	-7.55455	12.9844	2492
Lpin3	1	-7.42171	68.0878	11755.8
Pkp2	1	-7.35443	9.70157	1681.45
Hist1h2ab	1	-7.28737	2.05787	428.114
Aph1b	1	-7.27254	48.4566	7601.61
Rps20	1	-7.27084	209.637	32113.2
Cisd3	1	-7.15569	1.91318	377.892
Sp5	1	-7.09897	8.35682	1240.17
Spp1	1	-7.09803	35.1175	4616.91
Cd44	1	-7.02113	30.0526	3898.95
Hist1h4h	1	-6.9504	30.1568	3658.23
Ppp1r14b	1	-6.94489	40.8729	5067.71
Ltc4s	1	-6.92694	15.1193	1877.13
Tnfrsf26	1	-6.8866	47.5377	5669.35
B3gnt3	1	-6.87943	57.5864	6666.32
Pde6h	1	-6.81009	11.5459	1366.72
Loxl2	0.999993	-6.78674	93.2899	9603.62
Ppm1j	1	-6.76295	16.2965	1822.46
Cks1b	0.999999	-6.72786	6.08174	682.821
Exoc3l4	1	-6.70127	8.1031	925.328
Nox4	1	-6.66297	62.8088	6311.1
Marcksl1	1	-6.58509	34.1057	3274.37
Tnfaip2	1	-6.54077	30.1647	2880.13
Bmp2	1	-6.52723	51.8246	4695.43
Glipr2	1	-6.52213	132.138	12090.2
Phlda3	1	-6.51781	68.5586	6314.72
Galk1	1	-6.51738	37.1313	3405.39
Adm	1	-6.47325	394.691	34737.6
Nutf2	1	-6.43146	14.4189	1183.91
Gm14295	1	-6.42861	4.75597	472.233
Pcdh7	1	-6.40473	40.0929	3435.99
Upp1	1	-6.37686	39.4747	3245.51
Mrpl57	1	-6.35049	43.2693	3531.96
Ftl1-ps1	1	-6.34172	6.92769	605.337
Col5a2	1	-6.28592	342.496	26023.7
Lhx6	0.999999	-6.27498	168.738	12329
Apln	1	-6.2654	2193.34	167122
Gm4724	1	-6.2212	3.7638	339.323
Prnd	1	-6.20684	531.253	39177.5
Ndn	1	-6.16302	34.6455	2516.61
Ccn2	1	-6.13844	2973.28	206616
Gm14305	1	-6.10111	6.89938	521.771
Dpysl3	1	-6.0844	313.301	20942.7
Ptrh1	1	-6.03535	10.778	731.477
Fkbp5	1	-6.03187	35.1163	2345.44
Romo1	1	-5.98899	41.9303	2583.29
Kdelr3	1	-5.98321	15.6877	1030.83
Mgmt	1	-5.9801	39.0809	2504.43
Hmga1	1	-5.97673	124.476	7765.57
Tnfrsf12a	1	-5.8824	180.414	10665.4
Gnai1	1	-5.83025	77.4829	4313.1
Fhl2	1	-5.81449	43.8822	2448.82
Mif	1	-5.80673	178.147	9806.51
Dctd	1	-5.77479	11.3384	658.772
Egln3	1	-5.76743	27.3882	1525.64
Chac1	1	-5.7673	11.4045	660.446
Litaf	1	-5.76539	907.491	48756
Rps28	1	-5.72111	138.032	7276.43
Cyp4b1	1	-5.66953	55.0513	2754.89
Fabp5	1	-5.65422	9.63697	514.135
Sdc4	1	-5.63838	79.2796	3961.44
Ptgs2	0.999773	-5.62886	1239.94	56881.4
Chst7	0.999971	-5.59869	49.7966	2296.36
Abcb1b	1	-5.57164	112.672	5291.16
Plau	0.999803	-5.56412	35.9189	1595.55
Slc19a2	1	-5.54692	74.0108	3461.66
Il3ra	1	-5.50983	30.2912	1399
Adam12	1	-5.47851	138.352	5958.36
Car13	1	-5.41809	10.9229	500.64
Fads3	1	-5.41544	197.466	8382.59
Itga5	1	-5.37124	950.896	37802.6
Bmp6	1	-5.36946	73.0895	2960
Tubb6	1	-5.3311	1060.17	41660.3
Cox18	1	-5.30582	29.609	1189.52
Bean1	1	-5.29526	94.4988	3735.66
Rasa4	1	-5.2902	21.3248	857.591
Rpl36a	1	-5.27733	194.313	7460.62
Trpv2	1	-5.27506	36.8053	1440.47
Dhh	1	-5.26301	55.1895	2140.85
Bmp4	1	-5.25905	90.5436	3460.71
Acot7	1	-5.24214	89.1794	3322.71
Hist1h2ap	0.99984	-5.19697	65.8886	2279.15
Scand1	1	-5.18587	22.0734	827.467
Emp1	1	-5.16159	1359.29	48438.1
Hist1h4d	1	-5.15936	82.3047	2895.72
Pgls	1	-5.15037	95.6425	3319.45
Plaur	1	-5.13488	184.524	6355.39
Glrx	0.999968	-5.08844	286.165	9185.6
Map1s	0.999993	-5.05607	141.1	4486.33
Ak1	1	-5.04949	62.004	2056.05
Slc39a14	1	-5.0165	45.7932	1503.42
Ndufs5	1	-4.99872	96.9417	3094.24
Pgk1	1	-4.98651	1838.74	56333.1
Eva1c	1	-4.9759	41.8956	1343.22
Dusp14	1	-4.96696	29.9999	948.122
Odc1	1	-4.96419	792.338	24573.2
Rps29	1	-4.93236	444.095	13460.5
Rps16	0.999974	-4.9171	298.959	8553.7
Cpm	0.998983	-4.90902	244.35	6883.2
2310039H08Rik	1	-4.90476	18.2963	561.154
Gsto1	1	-4.90197	80.6135	2391.82
Lsm7	1	-4.89911	51.2248	1505.69
Ctps	1	-4.89242	535.03	15885.2
Trappc6a	1	-4.87517	58.688	1731.54
Eef1akmt4	1	-4.86604	36.0787	1058.02
Aprt	1	-4.85128	122.929	3546.28
Tlr4	1	-4.84965	178.977	5075.61
Synpo	1	-4.84756	383.489	10859.3
Ercc1	1	-4.83558	349.225	9932.43
Gapdh	1	-4.82397	2476.62	68204.4
Hist1h2ae	1	-4.81382	4.68829	152.177
Rps6	1	-4.81051	875.565	24378.2
S100a10	1	-4.80813	235.586	6579.43
Pxdn	1	-4.79891	284.312	7780.27
Srxn1	1	-4.78814	131.362	3616.74
Cdk2ap2	0.999999	-4.78259	102.614	2730.73
Cst6	1	-4.75687	50.8845	1392.64
Esd	1	-4.73179	931.724	24719.9
Elob	1	-4.71255	384.47	9944.02
Eif4ebp1	1	-4.70785	247.22	6368.2
Tmem47	1	-4.70759	765.518	19955.2
Abhd11	1	-4.70401	24.2061	648.067
Lox	1	-4.70272	205.43	5354.67
Tmem258	1	-4.68245	87.1584	2216.36
Lcp2	0.999997	-4.66992	90.951	2238.65
Fhl1	1	-4.66531	198.932	5021.9
Ctla2b	1	-4.64312	324.407	7913.7
Plekho2	1	-4.64033	279.587	6834.94
Dcxr	1	-4.62946	66.9752	1658.27
Ncam1	1	-4.62742	116.519	2840.15
Igfbp3	1	-4.62593	2234.15	53444.7
Slco3a1	1	-4.62429	116.509	2799.05
Zdhhc2	1	-4.61214	66.8888	1648.61
Mthfd2	1	-4.60335	49.8682	1224.19
Dbn1	1	-4.5994	159.686	3831.4
Mob3a	1	-4.56431	141.546	3351.4
Ddx28	1	-4.5604	44.6837	1070.53
Arrdc4	1	-4.5434	84.2506	1966.65
Snrpe	1	-4.54291	142.7	3342.86
Sat1	1	-4.54104	1093.27	25330.5
Atic	1	-4.53563	99.9296	2309.65
Palld	1	-4.53071	578.784	12915.6
Ndufb6	1	-4.52601	213.15	4909.06
Mrpl33	1	-4.51934	170.804	3927.94
Rpp40	1	-4.48779	25.1326	572.843
Gpn2	1	-4.47651	15.4397	359.302
Efhd1	0.999996	-4.44223	93.8376	1968.3
Bex3	1	-4.43986	563.143	12016
1110008P14Rik	1	-4.42056	94.0089	1985.44
Rps27l	1	-4.40791	495.029	10501
Gng5	1	-4.40244	894.482	18767.1
Dok1	1	-4.39932	35.094	744.77
Ndufa11	0.999983	-4.39783	194.69	3937.61
Ptgis	1	-4.39494	173.543	3648.05
Hmox1	1	-4.38632	524.924	10943.5
Angpt2	1	-4.3644	3441.02	70696
Hes6	1	-4.3617	38.1124	787.311
Nek6	1	-4.35152	190.572	3840.92
Tmem147	1	-4.35043	96.5773	1963.99
Npm3	0.999998	-4.33713	29.1429	580.896
Tgif1	1	-4.32321	200.581	4013.96
Cstb	1	-4.31524	393.949	7788.42
Pi4k2b	1	-4.3144	47.8813	963.639
Esm1	0.999038	-4.31335	70.7628	1341.99
Tmem150a	1	-4.29746	41.323	824.732
Rhbdl2	1	-4.29598	50.7615	985.07
Metrnl	1	-4.28888	67.7958	1310.92
Uap1l1	1	-4.27654	178.794	3413.54
P2ry10b	0.998946	-4.27277	156.172	2831.26
Aimp2	1	-4.27074	88.7693	1695.91
Mcm6	1	-4.2649	112.639	2159.99
Anxa2	1	-4.2582	2940.08	55940.3
Abhd17a	0.999994	-4.25592	386.28	7115.62
Ccn1	1	-4.25489	4733.23	89828.5
Mrps12	1	-4.25303	27.4225	530.678
Dram1	1	-4.24352	81.2783	1552.67
Pgm1	1	-4.24089	151.356	2858.77
Slc1a4	1	-4.22972	110.156	2067.83
Mapkapk3	1	-4.22073	48.72	921.766
Ndufa2	1	-4.21203	203.913	3758.45
Cks2	1	-4.21145	25.5749	482.09
Itgb3	1	-4.19526	488.993	8884.21
Grwd1	1	-4.18833	81.3592	1474.75
Rps26	1	-4.187	422.835	7557.18
Cycs	1	-4.17519	148.544	2643.65
Cerk	1	-4.16168	333.898	5849.89
Gng10	1	-4.15573	95.7967	1710.82
Rps18	1	-4.15385	757.447	13485.3
Emp3	0.999953	-4.1485	130.054	2221.85
Lxn	0.999996	-4.12688	404.045	6817.8
Sdf2l1	1	-4.11971	77.5553	1344.54
Slirp	1	-4.11322	86.037	1498.99
Ecscr	1	-4.10513	477.51	8192.8
Thyn1	1	-4.10426	111.379	1925.42
Timp2	1	-4.08518	541.918	8959.66
Emg1	1	-4.07956	116.018	1974.05
Chst1	0.991952	-4.07066	214.332	3361.95
Dynll1	1	-4.06924	1179.28	19775.2
Yif1a	1	-4.06876	216.22	3607.11
Gngt2	1	-4.05808	83.8799	1378.14
Asns	1	-4.04952	340.053	5576.19
Fblim1	1	-4.04886	225.064	3673.99
Angptl4	1	-4.02584	1233.15	19627.4
Mfap3l	1	-4.00231	293.496	4668.28
Taf10	1	-3.99957	347.77	5546.9
Prdx4	1	-3.99625	550.192	8765.52
Sesn2	1	-3.9936	127.263	2025.85
Epha2	1	-3.99063	648.715	10012.3
Plpp1	1	-3.98221	1886.52	29689
Erh	0.999345	-3.97459	165.385	2469.34
H6pd	1	-3.95967	336.569	5231.91
1700017B05Rik	1	-3.95302	142.971	2220.56
Gsn	1	-3.95242	492.927	7553.41
Osbpl5	1	-3.94156	151.139	2322.97
Cmtm7	1	-3.93001	52.3649	803.291
Cd63	0.997397	-3.92147	696.294	9954.28
Psmb2	1	-3.91145	433.424	6422.84
Laptm5	0.999999	-3.90658	114.189	1673.26
Sema3a	1	-3.90348	59.747	898.166
Kit	0.998554	-3.89634	495.626	6667.02
Ch25h	0.999975	-3.89581	119.155	1723.64
Atp5e	1	-3.87418	251.272	3694.46
Nradd	1	-3.87391	33.6129	498.276
Rps2	0.995386	-3.86695	1777.57	24602.1
Hist1h2bc	1	-3.86526	178.767	2599.73
Polr2k	1	-3.85877	89.742	1310.75
Ctsd	1	-3.85853	2222.27	32054.2
Agpat5	1	-3.85488	603.104	8736.76
Uqcr11	0.999999	-3.84962	377.074	5288.34
Rangrf	1	-3.84773	54.1042	784.003
Sdhaf4	1	-3.83982	36.8273	528.045
Timm17a	1	-3.83827	659.544	9372.4
Col18a1	1	-3.83333	1674.89	23644.7
Slc35e4	1	-3.82367	274.071	3869.23
Abca4	0.999999	-3.81877	156.776	2164.51
Plbd2	0.999965	-3.81187	414.466	5619.56
Rpl15	1	-3.80677	2027.69	28011.3
Soat1	1	-3.80669	238.747	3300.15
Cox8a	1	-3.80203	742.017	10286.9
Mrps22	1	-3.80151	58.5227	822.21
Hspb8	1	-3.79663	142.738	1989.63
Nr2f6	1	-3.79513	117.381	1600.27
Rrp9	1	-3.78634	86.0533	1190.61
Dpm3	1	-3.78574	63.5266	876.769
Rab31	1	-3.77864	464.286	6355.93
Cdh13	0.999996	-3.7659	377.522	4996.89
Coa3	1	-3.76489	237.125	3163.9
H2afx	1	-3.75852	78.5975	1061.08
Pam16	0.998657	-3.75711	71.2248	922.384
Tax1bp3	1	-3.7566	637.289	8606.83
Pawr	1	-3.75182	91.023	1234.62
Tmem252	0.999812	-3.75044	1070.18	13881.2
Tmem176a	0.989585	-3.75043	386.991	4880.65
Psmg4	1	-3.74922	39.3355	538.086
Tfpi2	1	-3.74294	39.232	533.071
Mthfsl	1	-3.74158	33.8717	453.097
Emc8	0.999999	-3.7398	281.406	3661.67
Dynlt1f	1	-3.73597	91.6368	1229.47
Hid1	1	-3.73349	626.199	8211.16
Rps25	1	-3.73108	1101.15	14539.4
Mrpl54	1	-3.7227	162.087	2129.09
Cdr2l	1	-3.72197	354.15	4636.92
Itga9	1	-3.71542	92.7925	1218.42
Sap18b	1	-3.71267	444.503	5799.85
Tmem203	1	-3.70905	41.6204	544.88
Grpel1	1	-3.70438	292.339	3804.4
Cited2	0.999967	-3.69962	630.46	7888.03
Me1	1	-3.69769	166.45	2152.39
Lrrc32	1	-3.69536	1142.82	14548.7
Mrpl36	1	-3.69302	93.5446	1207
Gm20390	1	-3.69216	165.131	2101.66
Ift22	1	-3.6895	65.837	856.422
Ajuba	1	-3.67654	330.731	4206.63
Mgst3	1	-3.67226	130.653	1648.63
Slc39a11	1	-3.6613	108.668	1368.67
F2r	1	-3.65813	2376.78	29789.3
Rps21	1	-3.65714	754.546	9339.45
Ccng1	1	-3.65499	1439.1	18016.9
Maff	1	-3.64953	1126.85	13817.8
Tuba1c	1	-3.64483	1692.86	20899.4
Avpi1	1	-3.6281	131.559	1621.84
Npdc1	0.997371	-3.62615	321.833	3774.43
Snx30	0.999999	-3.61602	199.197	2377.77
Rpl34	1	-3.60114	752.763	8972.39
Ndufb7	1	-3.59334	297.937	3527.62
Pop7	1	-3.59184	63.7356	770.048
Tmem126a	1	-3.59053	86.094	1045.07
Ampd3	1	-3.57874	202.171	2403.79
Jtb	1	-3.57262	113.375	1356.57
Lrrc59	1	-3.56827	1259.77	14754.1
Tmem256	1	-3.56207	380.594	4461.42
Fbxl6	1	-3.55804	62.9888	746.235
Dapk3	1	-3.55768	206.329	2387.13
Dera	1	-3.55631	102.22	1204.89
Sec61g	1	-3.54221	93.6588	1076.46
Got1	1	-3.54199	106.011	1234.54
Rnd1	1	-3.53753	1020.27	11719.2
Rftn1	1	-3.53707	177.057	2055.1
Pgam5	1	-3.53488	168.096	1955.27
Epdr1	1	-3.5318	111.549	1287.34
Serf2	1	-3.52484	2719.29	30836.8
Snrpf	1	-3.51608	79.08	905.177
Shisa4	1	-3.51516	97.9377	1114.61
Nectin2	1	-3.51362	560.49	6296.76
Nme1	1	-3.51279	398.604	4481.66
Itgav	0.999994	-3.50819	2191.2	24200.6
Lsm3	1	-3.50269	66.9809	766.526
Aga	1	-3.49967	133.206	1502.48
Mrpl20	1	-3.49248	246.022	2758.18
Slc20a1	1	-3.49154	1045.21	11629.7
H2-T22	1	-3.48757	161.364	1814.76
Orai1	1	-3.4802	400.181	4374.09
Akr1b3	1	-3.47651	184.563	2048.63
Prss23	1	-3.47563	6968.57	77401.6
Ndufa7	1	-3.47101	320.124	3530.82
Procr	1	-3.46741	903.614	9972.1
Cfl2	1	-3.46472	986.813	10770.5
Arl5a	0.998535	-3.46022	1866.07	19578.5
Tysnd1	1	-3.45603	127.315	1380.77
Txnl4a	1	-3.43149	227.198	2401.88
Mrpl34	1	-3.42513	113.756	1216.32
Parva	0.999999	-3.41758	2275.68	23700.1
Crlf2	1	-3.41059	146.769	1556.6
Fmc1	1	-3.40637	58.6911	618.669
Tubb2a	1	-3.40616	1074.82	11310.1
Ppp1r35	1	-3.40326	31.9609	345.006
Ncdn	1	-3.4017	198.432	2082.41
Prps2	1	-3.40053	144.879	1536.47
Ap1s1	0.999805	-3.3943	369.547	3750.69
Gm11808	1	-3.39004	797.943	8230.56
Churc1	1	-3.38822	174.802	1831.41
Tagln	0.966583	-3.3862	5170.38	50503.2
Cisd1	1	-3.38027	194.197	2014.76
Kctd11	1	-3.37912	366.026	3761.83
Golt1b	1	-3.37803	364.532	3793.58
Ethe1	0.995241	-3.37696	237.684	2349.59
Mrps16	1	-3.37013	150.827	1554.49
Csrnp1	0.999931	-3.36453	422.319	4209.73
Prdx5	1	-3.35424	584.393	5928.43
Abcc1	1	-3.35293	265.704	2701.83
Timm13	1	-3.35115	234.349	2382.46
1110065P20Rik	1	-3.34818	80.0078	818.009
Psat1	1	-3.34428	210.887	2121.64
Edn1	1	-3.33899	3486.92	34843.5
Nop9	1	-3.33147	326.962	3277.91
Tmem107	1	-3.32867	15.5004	160.901
Snrpd2	1	-3.32136	237.446	2374.37
Uqcrq	0.991151	-3.31632	462.938	4368.83
Surf4	1	-3.31341	1760.17	17340
Nudt22	1	-3.31314	38.8531	392.84
Tmem97	1	-3.29688	85.6488	841.453
Gm14410	1	-3.29262	18.1528	183.901
Cnn1	0.999999	-3.28562	183.678	1753.64
Tmem185b	1	-3.28369	208.249	2031.01
F8a	1	-3.28195	66.1982	648.135
Mtch2	1	-3.27772	652.35	6328.05
Acads	1	-3.27365	108.877	1059.01
Atp5j2	1	-3.27294	469.668	4535.72
Nln	1	-3.27276	90.0771	872.816
Npr3	1	-3.26825	187.378	1779.01
Psmg1	1	-3.26304	74.0229	713.894
Rpp21	1	-3.26143	69.0503	662.167
Lancl1	1	-3.25346	115.25	1101.38
Hexa	1	-3.253	1052.73	10012.9
2310009B15Rik	1	-3.25247	60.5493	582.333
Apba3	1	-3.25187	200.619	1912.79
Atoh8	0.998517	-3.25167	143.457	1320.57
Polr1e	1	-3.2467	56.5104	540.363
Rplp1	1	-3.24358	3530.74	33126.6
Casp3	1	-3.24083	144.849	1350.92
Cox5b	1	-3.23469	623.141	5849.49
Slc38a2	1	-3.23319	3944.76	36743.5
Tnpo2	1	-3.2311	723.764	6754.7
Naxe	1	-3.23018	289.317	2682.06
Nagk	1	-3.22288	243.565	2247.85
Cav1	1	-3.21316	20778	192027
Plp2	1	-3.21001	445.618	4105.03
Sf3b5	1	-3.20452	220.583	2034.87
Ifngr2	1	-3.19877	414.573	3761.62
Lpar4	0.998872	-3.19619	298.277	2622.62
Csrp1	1	-3.18763	5419.2	48879.6
Uqcc2	1	-3.18507	314.754	2840.4
Bmp1	1	-3.18415	236.283	2141.82
Zfyve21	0.999997	-3.18065	88.5313	789.968
Lamb1	0.999998	-3.17877	1693.37	14983.3
Pon3	1	-3.1775	46.6609	426.341
Eif1ax	1	-3.17401	1305.01	11697.3
Scarf1	1	-3.17394	660.861	5925.77
Rpl41	1	-3.1739	3186.87	28594.5
Snrpc	1	-3.17083	189.993	1707.84
Ndufa13	0.999998	-3.16728	587.735	5172.4
Coprs	1	-3.16675	56.7254	512.427
Pin1	1	-3.16359	371.261	3317
Gm9803	0.999923	-3.15684	46.6566	408.421
Cdc34	1	-3.15235	373.884	3310.48
Slc12a4	1	-3.1465	947.222	8305.89
Nabp1	0.999057	-3.14624	197.3	1680.84
Cldn12	0.999997	-3.14478	308.043	2661.43
Hist1h1e	0.998918	-3.14426	473.881	4035.69
Myo1c	1	-3.14315	5240.98	45825.2
Adam9	1	-3.14299	1104.84	9664.47
Tmem70	1	-3.12911	249.67	2182.85
Cdo1	1	-3.11252	32.8938	290.264
Mier2	1	-3.11209	93.9162	818.143
Dnajc15	1	-3.10817	214.989	1853.37
Eef1e1	0.999998	-3.10523	113.749	962.322
Rpl36al	1	-3.10067	680.786	5836.47
Spsb1	1	-3.09717	123.43	1050.65
Cyb561	1	-3.09588	738.351	6245.87
Smim26	1	-3.09384	51.8506	447.307
Bola2	1	-3.09332	262.8	2242.36
Tyms	1	-3.09106	93.7274	793.949
Tpbg	1	-3.09063	189.705	1621.05
Scpep1	1	-3.08999	483.431	4065.73
Cryab	0.999923	-3.08591	221.302	1826.4
Eno1	0.989585	-3.08557	3979.29	32263.6
Timm8b	1	-3.07648	303.912	2567.12
Depp1	1	-3.07372	1488.9	12361
Rps12-ps3	0.999018	-3.07258	3231.61	26259.7
Ggct	1	-3.07222	64.9694	549.476
Gnpnat1	1	-3.06875	166.248	1397.34
Sfxn1	1	-3.06865	336.085	2820.74
Rbm18	0.999961	-3.0677	670.366	5462.94
Wdr18	1	-3.06418	433.867	3568.72
Limd2	0.999579	-3.05367	203.136	1637.94
Eif5a2	1	-3.0496	325.86	2694.54
Gpx8	1	-3.04521	101.551	841.83
Plin2	1	-3.0434	1311.25	10720
Rin1	1	-3.04233	215.62	1775.28
Emc6	1	-3.03454	331.939	2711.17
Tmem37	0.999987	-3.03393	502.309	4019.45
Cyb561d2	1	-3.03201	53.3134	434.559
Comtd1	0.999998	-3.03139	79.8274	644.654
Map2k1	1	-3.03127	740.467	6038.27
Lpar6	1	-3.02705	1399.29	11384.7
Lmna	1	-3.02285	2476.18	20040.5
Ccnd1	1	-3.0172	5237.41	41912.5
Trip6	1	-3.01505	330.87	2676.33
Dpp7	1	-3.01429	97.4453	788.678
Fbxw9	1	-3.01334	222.127	1776.94
Tspan2	1	-3.01068	574.569	4568.18
Capg	1	-2.99839	1064.17	8453.86
Selenoi	1	-2.99644	368.811	2902.13
Clec14a	0.983042	-2.99574	5209.51	39953.1
Pwp2	1	-2.99547	216.974	1727.77
Tmem43	1	-2.99291	1334.21	10613.8
Chchd5	1	-2.98639	68.3703	547.434
Rpl27	1	-2.98548	1075.25	8512.37
Bloc1s2	1	-2.98104	118.919	933.703
Rbm3	1	-2.98007	2443.62	19164.7
Nrros	0.986615	-2.97864	527.971	3980.92
Pex14	1	-2.97834	171.505	1355.13
Rab32	1	-2.97721	92.3071	724.011
Pfdn1	1	-2.97667	309.251	2438.93
Rpl35a	1	-2.97579	1443.62	11263.5
Itprip	1	-2.96895	357.892	2792.5
Errfi1	1	-2.96766	961.906	7473.69
Commd2	1	-2.95684	186.145	1447.07
Cxcl16	1	-2.95675	260.764	2000.44
Gpr180	1	-2.95537	155.468	1200.03
Ccdc107	1	-2.94674	86.1965	659.318
Dad1	0.973624	-2.94656	817.785	5994.75
Emcn	0.999999	-2.94212	9770.24	73851.7
Mcam	0.999964	-2.93163	2329.47	17338.4
Tuba1a	1	-2.92933	8731.99	65711.3
Siah2	1	-2.92761	108.392	829.065
Fkbp10	0.999655	-2.92723	257.813	1907.33
0610012G03Rik	1	-2.92087	245.899	1856.01
Bcar1	1	-2.92086	1639.43	12225.9
Ube2s	1	-2.92047	630.102	4763.61
Hscb	1	-2.91892	51.454	393.271
Ccnyl1	1	-2.91792	766.609	5767.39
Nt5c	0.997185	-2.91309	178.917	1300.68
Tgfb1i1	0.998955	-2.91267	756.638	5507.76
Slc30a4	1	-2.9029	1327.76	9834.23
Pus1	1	-2.89799	105.271	789.011
Ost4	1	-2.89731	741.658	5446.76
Manea	1	-2.89439	359.007	2652.93
Map1b	1	-2.89123	1308.99	9603.82
Wsb2	1	-2.89057	1978.6	14516.1
Rnft1	1	-2.89053	275.335	2042.98
Lsm5	1	-2.88918	51.9742	389.337
Hacd1	1	-2.88371	181.415	1333.31
Myl12a	1	-2.88322	5560.78	40432.7
Ftl1	0.999998	-2.88045	11838	85622.5
Tmem199	1	-2.8783	124.366	918.347
Ckb	0.995987	-2.87552	284.6	2015.57
Il1rap	0.999992	-2.85898	418.223	2969.57
Jpt1	1	-2.85771	553.482	3981.78
Rps23	0.999991	-2.85476	1927.28	13675.1
Brat1	1	-2.85109	189.521	1356.5
Atp13a1	1	-2.84843	577.453	4111.04
Ndufa1	0.999983	-2.84705	477.02	3361.25
Tmem88	0.999998	-2.84492	543.402	3836.51
Cebpd	1	-2.8446	731.335	5202.24
Rassf2	1	-2.84332	333.065	2374.99
Rtn4	0.999706	-2.84256	6142.11	42872.5
Fkbp1a	0.985985	-2.84131	8168.83	56300.4
1110012L19Rik	1	-2.84092	82.1223	592.495
Mmgt2	1	-2.83864	74.5647	533.897
Atp5l	1	-2.83517	517.809	3696.71
Psmd8	1	-2.8341	1790.99	12755.2
Renbp	1	-2.83086	117.73	830.987
Slc35a2	1	-2.82745	209.797	1487.87
Iah1	1	-2.82547	109.999	781.325
Pdk4	0.994265	-2.82304	398.293	2722.52
Exosc4	1	-2.8121	205.318	1431.95
Tuba4a	1	-2.81198	97.9489	686.223
Tnfaip8l1	0.999521	-2.81119	571.417	3909.71
Slc35c2	0.999963	-2.80762	145.192	998.262
Tpi1	1	-2.80665	2297.95	15934.2
Sertad1	1	-2.80306	587.479	4098.83
Gna12	1	-2.80146	1690.7	11604.5
Lrrc28	1	-2.7955	221.862	1540.54
Klhl21	1	-2.79367	360.1	2478.04
Cstf1	1	-2.79324	165.469	1147.04
Rpl32	1	-2.79127	2868.71	19742.3
Fez1	1	-2.78931	229.68	1583.95
Tmem129	1	-2.78875	145.258	999.415
Me2	1	-2.78742	395.589	2726.11
Wdfy1	0.99988	-2.7862	963.227	6465
Fam89b	1	-2.78466	231.76	1576.61
Tnfrsf10b	0.996333	-2.78102	548.319	3618.57
Prmt7	1	-2.77972	311.507	2129.58
Mboat2	0.998327	-2.77965	303.909	2015.93
Dph5	0.999733	-2.77937	287.022	1917.65
Mcub	1	-2.77783	160.091	1096.24
Timm10b	0.999987	-2.77669	384.068	2582.8
Emc9	1	-2.77378	46.272	318.22
Rpl37	1	-2.76941	1062.26	7240.23
1600002K03Rik	1	-2.76832	41.3171	285.877
Zdhhc12	1	-2.76543	139.183	943.224
Hint2	1	-2.76476	156.018	1049.52
Phyhd1	1	-2.76119	50.3333	345.435
Myct1	1	-2.76004	893	6035.17
Mdh2	0.996797	-2.75932	952.307	6224.55
Rpsa	1	-2.75367	6495.34	43210
Mcu	1	-2.75227	226.242	1520.3
Ext1	1	-2.75096	473.199	3151.34
Wdr92	1	-2.75044	125.598	848.425
Rpl7a	0.999973	-2.74988	2406.32	15844.8
Noc2l	1	-2.74635	446.364	2980.61
Rpl17	1	-2.74189	1197.99	7923.3
Arf1	0.999991	-2.73714	3454.03	22593.3
Naglu	1	-2.73612	393.971	2607.47
Bola3	1	-2.73418	258.686	1697.45
Rplp0	1	-2.73092	6059.38	39922.5
Slc35f6	1	-2.7253	256.028	1695.2
Pfn1	0.999277	-2.72257	5533.9	35566.6
Isg20l2	1	-2.72189	235.244	1552.38
Rps27a	1	-2.72078	1799.17	11770.1
Socs3	1	-2.72028	357.968	2331.24
Rpl3	1	-2.72017	2149.07	14041.7
Col8a1	1	-2.71981	410.443	2684.21
Gadd45a	1	-2.71855	283.94	1855.42
Ghr	1	-2.71647	987.82	6402.48
Alyref	1	-2.71269	565.538	3710.03
Lmcd1	1	-2.71268	224.092	1458.26
Gm20498	1	-2.71262	97.8534	638.305
Atp6v1g1	1	-2.70954	1253.64	8188.05
Sgce	0.999977	-2.70583	193.824	1244.94
Psmb3	0.999996	-2.70275	1072.78	6862.54
Sephs2	1	-2.70232	320.226	2084.17
Fstl1	0.999998	-2.70134	1741.97	11154.3
Sac3d1	0.999918	-2.68998	171.163	1082.76
Tomm5	1	-2.68878	263.526	1701.18
Med31	1	-2.68582	72.0073	462.153
Sh3bp5l	1	-2.68422	609.971	3872.91
Mthfd2l	1	-2.6821	91.2527	586.465
Atox1	0.999998	-2.68015	1075.69	6788.03
Gaa	0.999832	-2.6763	361.449	2260.3
Uqcr10	0.999997	-2.67482	602.921	3785.88
Psmb5	0.999967	-2.67479	911.024	5699.28
Slc43a3	0.999367	-2.67392	283.423	1770.56
Rpl37a	1	-2.67322	2590.4	16476
Fam149a	1	-2.67316	212.537	1348.08
Arrdc3	1	-2.67225	879.501	5580.12
H2afj	0.99708	-2.67162	514.751	3178.81
Tex30	1	-2.67085	57.0482	364.669
Rmc1	1	-2.66774	192.947	1228.1
Ankrd46	1	-2.66541	1227.07	7686.76
Ppp1r18	1	-2.66475	799.056	5042.73
Cib1	1	-2.66468	236.229	1487.7
Rmnd5b	0.999988	-2.66273	539.152	3356.83
Yae1d1	1	-2.66213	332.468	2108.35
Cebpzos	1	-2.65829	99.1197	628.837
Wdr4	1	-2.65712	167.312	1055.1
Tbc1d7	0.999846	-2.65397	93.4542	578.706
Psma3	1	-2.65384	1323.73	8278.18
Polr2d	1	-2.65352	141.386	891.837
Apex1	1	-2.65223	125.443	792.122
Qsox1	1	-2.65112	2026.21	12664
Atp5mpl	1	-2.64969	370.196	2326.15
Tmem164	1	-2.64689	369.245	2300.86
Cavin3	1	-2.64667	1830.85	11311
Znhit2	0.999998	-2.64391	127.247	785.875
Gps1	1	-2.64085	642.16	3984.98
Lamtor1	1	-2.64085	561.438	3494.16
Tmem106c	1	-2.6399	170.874	1062.8
Ubtd1	0.999956	-2.63477	715.87	4363.74
Inafm2	1	-2.63181	341.98	2116.24
Nufip1	1	-2.62993	159.76	986.903
Lrrc75a	1	-2.62965	120.732	742.303
Otub1	1	-2.62747	984.203	6035.96
Endog	1	-2.62611	74.7844	458.992
Ctla2a	0.998773	-2.6253	13924.5	83996.9
Pigf	1	-2.62355	124.036	767.249
Ankrd54	1	-2.62134	124.778	767
Thap11	1	-2.61993	185.133	1136.3
Mgst1	0.998485	-2.61707	632.201	3782.05
Atp6v0d1	1	-2.61683	712.67	4366.72
Ctsf	0.999999	-2.61678	94.9851	578.666
Mrpl45	1	-2.61578	244	1496.76
Ier5l	1	-2.61568	376.612	2286.06
Banf1	0.98148	-2.61497	517.741	3041.01
Nubp2	0.999519	-2.61287	241.523	1442.49
Atp5g1	0.997943	-2.61266	935.65	5564.8
Axl	0.999999	-2.61157	903.458	5434.51
Tpm1	0.999951	-2.61141	8580.95	51330.1
Atp5d	0.990201	-2.61003	1131.7	6660.9
Cnnm4	0.997583	-2.60803	379.22	2236.91
Rabif	1	-2.60716	380.887	2307.41
Otud1	1	-2.60135	1319.15	7899.83
Rpl13	1	-2.59732	3257.94	19702.2
Zfp697	0.998907	-2.59203	272.092	1600.33
Yrdc	1	-2.59066	307.825	1856.63
Mrto4	1	-2.59056	174.196	1048.06
Pdcd5	1	-2.58789	262.32	1575.07
Aasdhppt	1	-2.57672	258.5	1544.63
Rad51d	1	-2.57596	144.597	865.39
Tradd	1	-2.57279	101.739	605.381
Atp6v1a	1	-2.5688	2081.31	12326.6
Fdx1	1	-2.56468	182.365	1079.85
Tnfrsf23	0.999973	-2.56255	600.905	3483.11
Pet100	1	-2.56236	117.537	694.312
Fstl3	0.999996	-2.56232	157.01	914.109
Cnih4	0.999761	-2.55992	699.851	4035.04
Ace	1	-2.55941	1625.28	9513.47
Pdlim2	1	-2.55803	149.053	873.394
Mrps18a	1	-2.55556	171.575	1002.5
Tsr3	1	-2.55444	112.152	660.508
Hist2h2aa1	1	-2.55128	386.56	2249.62
B4galt2	0.999782	-2.54993	133.617	767.709
Fam102b	1	-2.54641	662.473	3830.48
Ube2j1	1	-2.54616	1276.42	7374.59
Ndc1	1	-2.54284	273.558	1593.66
Gcsh	1	-2.53955	333.125	1938.21
Trmt112	0.999256	-2.53427	212.969	1204.46
Yipf1	1	-2.53322	345.178	1993.6
Agpat2	1	-2.53208	103.772	599.451
Tmem120a	0.999251	-2.53103	165.919	935.764
Atxn10	0.999999	-2.53044	1441.37	8198.99
Krtcap2	1	-2.52725	706.76	4032.54
Lpp	0.99865	-2.52236	3182.14	17774.4
Aurkaip1	1	-2.51936	503.126	2871.08
Tssc4	1	-2.5192	206.532	1180.96
Ntmt1	1	-2.51787	130.541	747.632
Tram1	1	-2.51699	2992.45	17055.1
Pycrl	1	-2.51526	127.92	728.879
Polr2l	1	-2.51492	499.786	2847.02
Wdr1	1	-2.51378	6359.18	36146.5
Tarbp2	1	-2.51341	187.787	1067.84
Tes	1	-2.51066	1562.79	8869.65
Pgpep1	1	-2.51056	606.341	3449.18
Btg1	1	-2.50914	656.044	3708.75
Mogs	1	-2.50765	274.894	1566.62
Ube2w	1	-2.50478	589.338	3341.17
Cox19	1	-2.50204	222.902	1263.8
Gadd45b	1	-2.50154	463.324	2598.14
Acer3	1	-2.50046	552.634	3122.79
Rnf126	1	-2.50022	182.89	1025.96
Eif1a	1	-2.49847	1315.7	7395.81
Igf2r	0.992594	-2.49719	1507.17	8254.95
Gba	1	-2.49692	666.537	3763.05
Hint3	1	-2.49556	210.681	1186.53
Gstm5	1	-2.49534	126.179	713.065
Ndufc1	1	-2.49352	289.275	1611.89
Pdk3	1	-2.49243	191.416	1076.62
Chrnb1	0.999994	-2.49211	421.222	2334.04
Cox6a1	0.992018	-2.4917	1912.8	10421.4
Srprb	1	-2.49025	650.122	3611.21
Tmed1	0.999946	-2.49008	130.602	723.773
Rpl29	1	-2.48859	1221.26	6846.12
Mafk	1	-2.48776	2189.07	12239.7
Cox7a2	1	-2.48649	1070.73	5994.93
Josd1	1	-2.48637	648.082	3605.8
Eny2	1	-2.48633	377.663	2114.65
Gm21992	0.999996	-2.48556	93.2077	517.856
Ptp4a1	1	-2.4836	4465.05	24894.7
Lamp1	1	-2.48294	6362.04	35544.4
Pdlim1	1	-2.48113	272.035	1514.96
Mrpl55	0.997279	-2.48107	144.144	785.705
Plcg2	1	-2.47997	510.889	2841.87
BC004004	1	-2.47735	568.884	3166.96
Nop16	1	-2.47699	150.503	835.53
D1Ertd622e	1	-2.47654	461.585	2565.77
Acat2	1	-2.4762	152.818	851.292
Rhoc	1	-2.47077	4131.04	22824.3
Cenpt	1	-2.46984	138.162	767.603
2510039O18Rik	1	-2.46864	933.373	5130.66
Srm	0.979181	-2.46609	371.044	1970.71
Tnfrsf1b	1	-2.4621	475.32	2613.42
Smim12	1	-2.46113	324.192	1780.9
Zfp706	1	-2.46096	1482.99	8061.91
Itgb1bp1	1	-2.45745	305.589	1675.48
Chmp1a	1	-2.45423	778.388	4221.44
Rpl28	0.999999	-2.45275	1371.87	7402.95
AI413582	1	-2.45009	137.25	749.275
Aven	1	-2.4496	108.855	597.47
Eloc	1	-2.4493	684.998	3697.58
Washc5	1	-2.44525	933.596	5069.79
Mall	0.999826	-2.43638	218.857	1166.61
Jund	0.999934	-2.43295	2071.4	10996.8
Gfer	1	-2.43246	145.059	786.472
Coq6	1	-2.43214	126.328	681.049
Ifrd1	0.999999	-2.43089	1329.32	7066.05
H13	0.999999	-2.42958	1210.49	6436.31
Ube2m	1	-2.4263	711.839	3783.94
Rabggta	1	-2.42167	151.748	808.078
Etf1	1	-2.42073	2287.5	12134.5
Bckdha	1	-2.42016	283.862	1518.23
Pycr2	0.999999	-2.41842	510.994	2698.77
Pxdc1	1	-2.41737	1203.13	6385.83
Gas2l1	0.96826	-2.41737	612.428	3144.79
Thap4	1	-2.41541	190.88	1022.2
Rnh1	1	-2.40889	1977.16	10477.1
Smdt1	0.999993	-2.40878	532.2	2786.11
Rpl6	0.997096	-2.40874	4230.14	21903.9
Tmem254c	0.999994	-2.40641	213.272	1116.65
Smim4	1	-2.40461	26.9844	145.451
Vma21	0.999579	-2.40309	750.452	3880.54
Prmt6	1	-2.40124	148.145	784.82
Pabpc4	0.994788	-2.40091	631.791	3235.36
Praf2	1	-2.40016	273.528	1436.44
Ppox	1	-2.39829	106.197	561.634
S100a4	0.999999	-2.39441	46.2674	243.957
Hbegf	0.998243	-2.39318	2993.55	15324.9
Bnip3	1	-2.39294	930.644	4830.66
Ssr4	1	-2.39235	601.116	3134.34
Smad6	0.989935	-2.39184	618.253	3158.04
Drap1	1	-2.39058	765.896	3992.56
Srf	0.999977	-2.39041	457.384	2356.75
Man1a	0.998588	-2.38765	1813.28	9294.58
Pkia	1	-2.38713	351.224	1829.14
Dstn	1	-2.3871	9540.74	49597.3
Tsen54	1	-2.38468	93.3075	488.6
Kti12	1	-2.38168	225.229	1162.07
Fcf1	1	-2.37878	233.496	1216.05
1810009A15Rik	1	-2.37748	219.939	1137.61
Zfp637	1	-2.37733	135.45	704.872
Ncbp1	1	-2.37418	506.324	2615.29
Med22	1	-2.37305	623.623	3226.14
Dctpp1	1	-2.37209	89.734	464.666
Mrpl13	1	-2.37182	316.169	1639.6
Agfg2	1	-2.37061	169.926	881.735
Tmem11	1	-2.36885	229.342	1176.6
Serp1	1	-2.36213	2157.6	11037.3
Nudcd2	1	-2.35995	293.682	1509.54
Asah1	1	-2.35812	1387.22	7033.77
Gipc1	1	-2.35744	809.979	4112.12
Psmd13	1	-2.3537	798.813	4071.64
Txndc5	0.999922	-2.35039	1291.88	6485.96
Prnp	1	-2.34695	8207.17	41444.5
Far1	1	-2.34693	914.938	4657.01
Mpv17l2	0.993529	-2.34598	241.807	1192.83
Arsa	1	-2.34273	803.47	4063.64
Rpp14	1	-2.34269	248.367	1260.32
Hsd17b7	1	-2.34162	257.676	1305.04
Cdc42ep3	1	-2.34081	1503.46	7615.7
Ppp4c	1	-2.33824	683.994	3444.81
Ndufaf3	1	-2.33627	204.292	1025.11
Cd9	0.999903	-2.33545	1068.51	5295.99
Rpl30	0.999994	-2.33458	1142.38	5686.91
Mcat	0.999998	-2.33264	136.127	679.85
Prdx6	1	-2.33195	1765.38	8820.45
Tsta3	0.999524	-2.33181	301.749	1488.06
Dbi	1	-2.32749	687.497	3430.02
Orc6	1	-2.32632	161.268	804.435
Dph3	1	-2.32477	510.147	2539.28
Cdc42ep5	0.999923	-2.32238	96.8415	479.048
Ergic1	1	-2.3156	981.467	4836.15
Polr2i	1	-2.31182	178.289	881.28
Atrnl1	0.999633	-2.30912	1430.27	6954.98
Carhsp1	1	-2.30836	1177.93	5808.56
Mtg2	1	-2.30832	133.673	665.144
Acyp1	1	-2.3067	101.451	501.712
Prr13	0.990918	-2.30247	847.226	4056.93
Tulp4	0.999465	-2.30193	4583.33	22134.4
Spcs3	1	-2.29876	1932.12	9444.75
Plk3	1	-2.29836	728.158	3563.98
Me3	0.999999	-2.29719	211.03	1027.89
Man2b1	1	-2.29712	698.234	3399.83
Marveld1	1	-2.29643	978.988	4770.06
Tmem65	1	-2.29598	1409.65	6921.37
Csf1	1	-2.29566	1598.53	7844.74
Mapk6	0.999185	-2.29471	3605.55	17277.4
Sssca1	0.999998	-2.28884	196.022	947.718
Galns	1	-2.28847	154.104	755.952
Rassf1	1	-2.28565	827.079	4020.67
Timm23	1	-2.28347	933.042	4525.32
Gm49336	1	-2.27878	1009.77	4857.02
Rps6ka4	0.999999	-2.27756	671.108	3213.21
Stub1	0.999977	-2.27701	920.583	4395.23
Mertk	1	-2.27428	3315.12	15876.8
Rhod	1	-2.27374	202.352	980.617
Med29	1	-2.27256	240.797	1155.71
Hspbp1	0.995183	-2.27243	183.906	868.748
Pygo2	1	-2.27201	917.574	4405.84
B4galt7	1	-2.26925	236.431	1138.96
Mfge8	1	-2.26551	2716.94	12977.7
Get4	0.999242	-2.26307	469.398	2207.07
Reep4	0.999901	-2.26266	108.752	515.751
Naa38	1	-2.26234	302.133	1445.09
Fbxl2	1	-2.25966	159.695	764.909
Commd10	0.999999	-2.25827	250.559	1187.26
0610009B22Rik	1	-2.25824	104.262	496.973
Blcap	1	-2.25755	437.981	2091.53
Mpi	1	-2.25713	158.229	756.51
Naga	1	-2.25647	204.328	978.606
Dus1l	1	-2.25312	296.432	1413.04
Med11	1	-2.25292	104.009	497.201
Tbc1d2	1	-2.25007	291.969	1390.07
Gemin7	0.999993	-2.24799	484.447	2272.62
Ncln	1	-2.24477	552.963	2598.82
Cystm1	1	-2.24353	542.079	2562.38
Atp6v1h	1	-2.2416	1196.7	5658.86
Dda1	0.999975	-2.24032	630.729	2937.31
Nutf2-ps1	1	-2.23657	455.971	2142.86
Abracl	0.999983	-2.23591	401.603	1863.52
Cnot9	1	-2.23555	459.73	2153.88
Timmdc1	1	-2.2334	173.426	810.378
Card19	1	-2.23213	441.777	2066.2
Gars	1	-2.22725	2746.42	12862
Mmgt1	1	-2.22571	751.866	3493.79
Eral1	1	-2.22537	204.958	959.634
Ndufb2	1	-2.22498	547.917	2535.05
Chkb	1	-2.21971	144.994	673.745
Aaas	1	-2.21927	249.945	1157.38
Ppp1ca	1	-2.21852	3608.69	16665.9
Ctsa	1	-2.21787	1639.1	7606.09
Sem1	1	-2.21625	1356	6265.22
Ppic	0.998957	-2.21557	2634.38	12017.2
Mrpl28	0.999877	-2.21507	434.743	1985.73
Snf8	0.998585	-2.21272	379.033	1719.87
Reps1	1	-2.21255	245.362	1128.28
Pgam1	1	-2.21069	3887.28	17908.5
Acot9	1	-2.21023	1793.51	8270.87
Icmt	1	-2.20758	1523.6	7027.24
Ly96	0.999922	-2.20754	137.362	627.719
Rps15	0.999994	-2.20642	2311.34	10519.4
Zwint	1	-2.20499	930.365	4286.1
Ufm1	1	-2.20424	1203.47	5512.87
Pde4b	0.999962	-2.20201	2680.51	12168.4
Pqlc3	1	-2.20116	163.487	749.126
Bax	0.99999	-2.20045	994.655	4508.5
Ckap4	1	-2.19774	1005.91	4591.85
Wdr6	0.999946	-2.19671	747.766	3375.74
Aldoa	1	-2.19361	9302.05	42326.9
Atp5k	1	-2.19188	536.683	2448.5
Nipsnap3b	1	-2.19146	327.415	1485.79
Mrpl10	1	-2.19098	401.066	1828.99
Aacs	0.999946	-2.1889	407.567	1834.57
Plxnb2	0.999999	-2.18618	759.328	3413.61
Zfpl1	0.99973	-2.18508	226.504	1013.95
Fam214b	1	-2.18439	802.135	3619.86
Ube2i	1	-2.18423	1966.69	8902.09
Ndufa6	1	-2.18421	557.125	2526.82
1700021F05Rik	1	-2.18241	91.5152	417.154
Tceal9	1	-2.18099	7686.15	34749.5
Kdelr2	1	-2.17945	1551.91	6991.05
Spindoc	1	-2.17806	196.863	886.794
Tceal8	1	-2.17747	1807.47	8126.51
Dnlz	1	-2.1767	282.131	1278.41
Fez2	1	-2.17535	2927.19	13206.1
Cdipt	1	-2.175	1568.78	7046.21
Ddost	0.999963	-2.17436	2195.17	9776.31
Mrps36	1	-2.17281	147.749	665.575
Tomm34	1	-2.17056	351.238	1574.65
Qsox2	1	-2.16693	557.296	2503.31
Nudt19	1	-2.16441	149.584	670.692
Rdh11	1	-2.16433	617.946	2768.12
Eif2b2	0.999999	-2.15597	761.102	3355.17
Mnat1	0.999987	-2.15435	385.345	1696.65
Txndc17	1	-2.15425	1315.4	5853.62
Sec13	1	-2.15398	1330.19	5905.73
Uck2	1	-2.15259	644.961	2853.48
Cyp4f16	1	-2.15189	159.563	711.87
Cct3	1	-2.15161	2306.86	10242.8
Tmem181a	1	-2.15141	720.268	3180.68
Mrps28	0.999983	-2.1504	203.415	893.607
Med21	1	-2.14947	355.731	1580.31
Clic1	1	-2.1474	3409.14	14994.4
Ak6	1	-2.14242	765.37	3380.07
Prdx3	1	-2.14137	596.36	2623.88
Klf16	1	-2.14105	282.746	1243.29
Psmg3	1	-2.14085	139.4	613.425
Arf5	0.97667	-2.14084	907.073	3881.84
Rras2	1	-2.1408	2258.71	9904.61
Swi5	1	-2.13783	1048.34	4602.83
Gadd45gip1	1	-2.13768	218.764	962.434
Nudcd1	1	-2.13715	378.783	1668.86
Sft2d2	0.999516	-2.13573	2279.36	9852.87
Ddah1	1	-2.13492	2934.42	12774.3
Fkbp14	0.999993	-2.13337	462.546	2008.86
Lsm4	0.955535	-2.13335	248.303	1053.1
Bin1	1	-2.13203	430.786	1886.41
Triap1	0.999914	-2.13164	244.053	1054.06
Dhrs1	1	-2.13143	576.552	2517.21
Khdrbs3	1	-2.131	176.368	771.602
Lypla1	1	-2.13078	1027.43	4473.46
Mrps18b	1	-2.12928	346.68	1501.49
Rab1b	0.999643	-2.12433	1825.89	7833.33
Tbcc	1	-2.12372	263.791	1143.9
Dnajc19	1	-2.1155	417.088	1805.32
Sdhb	0.999492	-2.11326	1316.65	5600.17
Ccdc124	0.99974	-2.11326	370.405	1579.64
Mrps24	0.999985	-2.11318	383.348	1639.11
Mex3d	1	-2.11164	307.391	1327.3
Nsg1	0.999888	-2.10881	142.858	609.277
Memo1	1	-2.10637	791.727	3406.27
Tmem208	0.999988	-2.10454	313.898	1335.33
Eif2b5	1	-2.10129	1046.25	4489.98
Plscr3	0.964238	-2.10041	1000.04	4150.47
Pla2g12a	1	-2.09879	257.211	1096.84
Tomm6	0.996727	-2.09843	453.521	1897.89
Zmat5	0.99901	-2.09642	87.1127	368.511
Btbd2	0.999529	-2.09575	293.342	1235.4
Nip7	1	-2.09478	310.307	1324.82
Fam173a	1	-2.09196	327.82	1387.22
Myof	0.998927	-2.09071	2377.31	9928.99
Coa6	1	-2.08778	89.1361	381.569
Ciao2b	1	-2.08716	348.315	1476.58
Klhl26	0.999997	-2.08666	262.262	1104.58
Tmem115	1	-2.08618	803.367	3388.98
9130401M01Rik	1	-2.0839	280.264	1185.18
Tmem167	1	-2.08099	1143.65	4829.29
Pear1	1	-2.08092	1567.3	6573.01
Homer3	1	-2.0802	462.553	1958.14
Rnf141	1	-2.08017	1800.35	7606.29
Dvl1	0.999995	-2.07803	645.803	2701.21
Chid1	1	-2.07798	390.658	1648.4
Shroom2	1	-2.07729	2045.99	8604.3
Atp6v0b	1	-2.07686	1429.33	5978.55
Btbd19	1	-2.07593	167.098	704.997
Rabepk	1	-2.07481	159.622	672.777
Nudt5	1	-2.07432	444.591	1875
Abce1	1	-2.07177	2151.32	9005.14
Gmppb	1	-2.0659	321.768	1341.9
Chic2	1	-2.06485	1410.43	5896.36
Ciapin1	0.999893	-2.06428	482.337	1987.95
Ndufs7	0.961663	-2.05952	610.859	2468.11
Gns	1	-2.0589	1909	7901.63
Tspo	0.994475	-2.0588	1411.47	5755.03
Rhoj	1	-2.05605	4224.87	17551.2
Phf5a	1	-2.05569	290.783	1202.96
Tyw5	1	-2.05433	87.3445	364.448
Nup37	1	-2.05347	125.224	521.498
Rpp25l	1	-2.05293	118.505	493.18
Nudt2	1	-2.05251	106.395	444.113
Lmo1	0.999913	-2.04984	72.5806	299.184
Fam234a	0.999994	-2.04833	568.087	2326.92
Mgat4b	0.994789	-2.04814	1336.4	5409.06
Sema3f	0.962317	-2.04726	607.008	2448.95
2310011J03Rik	1	-2.04447	443.845	1826.4
Sppl2b	0.999487	-2.04276	208.676	848.827
Cox14	0.989309	-2.03968	228.892	918.821
Mrps15	1	-2.03734	291.903	1190.16
Antxr2	1	-2.03648	365.869	1497.22
Asb6	1	-2.03586	226.2	922.157
N4bp3	0.950595	-2.03521	1770.99	7060.93
Ywhag	0.992662	-2.03478	1964.69	7861.46
Pter	1	-2.03391	127.233	522.912
Arl16	1	-2.02995	122.094	498.449
Bcl2l12	1	-2.02987	62.1362	255.898
Tsfm	1	-2.0277	131.467	538.277
Fam91a1	1	-2.02666	1540.39	6219.41
Timm10	0.999999	-2.02627	99.8037	405.897
Tomm20	1	-2.02465	2973.8	12076.7
Tatdn1	1	-2.02403	93.8177	383.619
Derl1	1	-2.0237	1474.72	5976.28
Med30	1	-2.02	146.898	597.504
Lrrc41	0.999968	-2.0175	1245.8	4984.94
Fam207a	1	-2.01567	255.579	1030.27
Pno1	1	-2.01461	470.442	1891.34
Megf8	0.997745	-2.01457	1221.29	4841.65
Flot2	0.970079	-2.01326	431.996	1695.65
Atp5g3	0.996779	-2.01292	1465.73	5797.71
Mtln	1	-2.01201	161.881	654.288
Ctsz	0.999996	-2.01138	1633.15	6516.54
Hs2st1	0.999648	-2.00917	725.275	2868.87
Ghdc	1	-2.00843	218.59	876.222
Mmadhc	1	-2.00829	644.374	2577.91
Trp53inp1	0.999985	-2.00596	1561.4	6201.04
AI837181	1	-2.00482	378.316	1518.33
Slc12a2	1	-2.00469	2598.49	10387.4
Lman2	1	-2.00416	2150.57	8591.45
Eef2k	1	-2.00357	460.725	1833.52
Vasp	1	-2.00353	2411.96	9610.71
Zdhhc5	1	-2.00338	2030.69	8080.81
Zfp593	1	-1.99858	151.514	605.155
Sgk1	1	-1.99744	8417.43	33536
Tmem263	1	-1.99696	837.705	3335.96
Fis1	0.999142	-1.99566	1172.1	4599.89
Map2k3	0.985338	-1.99524	1016.9	3946.36
Cox5a	1	-1.99512	1739.48	6879.65
Wdr83os	0.998811	-1.9947	395.225	1548.36
Polr2j	1	-1.99359	283.301	1122.33
Rtraf	1	-1.99192	1154.2	4584.18
Nfkb2	1	-1.98993	683.384	2707.27
Tmem18	1	-1.98805	400.095	1583.06
Vps29	1	-1.98758	1014.14	3997.35
Tmem33	1	-1.98681	2030.87	8014.37
Ppib	1	-1.98599	2395.57	9465.28
Cd93	0.977556	-1.98553	36222	140201
Psph	0.999991	-1.98535	256.316	1006.03
Nus1	0.999998	-1.98305	2036.19	7960.29
Rars	1	-1.98265	2137.36	8411.06
Pafah2	1	-1.98248	223.354	882.873
Fkrp	1	-1.98116	735.489	2898.09
Rpl24	1	-1.98104	2748.94	10785.4
Degs1	1	-1.98047	2420.52	9537.64
Rpl23a	0.999739	-1.97971	5365.05	20850.8
Alg1	1	-1.97661	298.523	1171.13
Gcdh	1	-1.97497	166.284	655.834
Yif1b	0.999997	-1.97326	960.67	3736.9
Slc11a2	1	-1.97091	395.359	1540.75
Anapc15	1	-1.97078	148.708	582.78
Msn	0.967068	-1.97049	25123.2	95918.9
Il17ra	1	-1.97008	638.774	2497.25
Sec23a	1	-1.96983	1111.88	4356.86
Hspa13	1	-1.9691	711.142	2771.73
Fam53a	0.998561	-1.96792	318.463	1226.77
Cyc1	0.9992	-1.96725	737.672	2838.68
Coq7	0.990339	-1.96565	130.768	500.754
Ssna1	1	-1.96312	379.448	1471.53
Ccdc71l	0.995012	-1.96293	676.576	2577.45
Noct	0.999987	-1.96276	8920.43	34405.7
Gpx1	0.997185	-1.96089	6019.38	23014.2
Pim3	0.999951	-1.95776	1614	6195.21
Spryd4	1	-1.95567	218.669	844.806
Slc27a4	1	-1.95248	578.457	2233.57
Copb1	1	-1.9493	2033.11	7834.68
E130309D02Rik	0.999925	-1.94882	272.287	1039.77
Rab24	1	-1.94776	243.934	937.62
Hcls1	1	-1.94752	285.765	1098.5
Srrd	1	-1.94473	95.4778	369.282
Sys1	0.999839	-1.94422	610.917	2319.9
Rnf185	1	-1.94386	1151.82	4417.24
Med8	1	-1.94339	361.617	1393.1
Nt5c3b	0.99999	-1.94191	240.579	915.986
Rpl39	0.999643	-1.94029	2598.37	9835.37
Mief2	1	-1.93781	161.822	621.847
Rce1	0.999999	-1.93662	498.91	1894.84
Mrps9	1	-1.93657	249.782	956.324
S1pr1	1	-1.93534	12091.1	46095.4
Rbx1	0.999397	-1.93506	1711.14	6441.93
Mrpl51	1	-1.9341	623.803	2381.89
Exosc5	0.999998	-1.93369	326.851	1239.55
Ppp2r3d	1	-1.93164	131.952	504.432
Mrpl38	1	-1.93045	309.17	1171.53
Usp39	1	-1.9287	502.82	1912.03
Ntan1	1	-1.92775	826.951	3134.77
Adipor1	1	-1.92621	6605.57	25022.2
Pes1	1	-1.92429	715.253	2705.34
Uqcrh	1	-1.92177	1064.74	4032.31
Oat	1	-1.92157	685.053	2595.28
Cops9	0.999587	-1.92078	1076.94	4020.17
2300009A05Rik	1	-1.9198	104.566	396.758
Slc39a3	1	-1.91907	450.131	1689.92
Mrpl32	1	-1.91835	278.013	1052.28
Plekhj1	0.999596	-1.91751	136.351	509.615
Polb	1	-1.91715	235.456	889.093
Rpl19	1	-1.91644	5474.31	20514
Bod1	1	-1.9159	461.493	1733.03
Chn1	1	-1.91524	145.557	551.364
Etfrf1	1	-1.91483	120.059	454.688
Tmem173	0.998932	-1.91457	192.07	715.646
Polr2h	1	-1.91385	146.288	553.329
Rae1	1	-1.91317	409.408	1539.11
Ints14	1	-1.91309	429.077	1615.61
Impad1	1	-1.91292	2766.17	10357.1
St3gal2	1	-1.91256	1541.81	5757.92
Pfkl	1	-1.9123	2778.33	10383.6
Ube2j2	1	-1.91142	601.94	2266.13
Castor1	0.985795	-1.91016	425.487	1567.29
Enpp5	0.984196	-1.90672	679.47	2499.11
Sema6b	0.999442	-1.90597	788.197	2914.15
Lage3	1	-1.90536	310.005	1154.84
Gtf2a2	1	-1.9052	389.464	1457.91
Sin3b	1	-1.90441	1753.83	6521.18
Dpp3	1	-1.90441	1201.28	4466.37
Pdlim5	0.980785	-1.9043	10049	36731.9
Mydgf	1	-1.90379	789.164	2954.21
Ehbp1l1	1	-1.90336	1279.23	4765.95
Pigs	0.996808	-1.90291	629.089	2309.05
Arpc5	1	-1.90136	3202.41	11932.4
Gulp1	0.99999	-1.90131	455.453	1686.22
Urgcp	1	-1.90122	801.312	2979.59
Cdkn2aipnl	0.999995	-1.90061	1039.44	3847.78
P4ha2	1	-1.90009	551.463	2053.1
Marcks	1	-1.89924	2716.35	10073
Plekha3	1	-1.89824	701.374	2615.01
Clptm1l	1	-1.89745	1680.15	6239.93
Ufc1	1	-1.89596	654.459	2428.98
Actg1	0.997977	-1.89588	60121.4	220064
Itpripl2	0.98619	-1.89526	6074.9	22163.9
Fam216a	1	-1.89474	201.232	748.497
Vps18	0.997647	-1.89423	678.196	2479.61
Txn1	1	-1.89105	1832.56	6764.2
Nudt7	1	-1.88979	141.015	523.836
Pvr	0.999935	-1.88941	1315.66	4811.77
Wdr74	1	-1.88925	309.885	1145.41
Rnf41	1	-1.88796	753.143	2788.91
Ddx39	1	-1.88753	906.315	3328.67
Pla2g6	1	-1.88742	497.315	1833.98
Nectin3	1	-1.88623	541.117	1995.69
Pusl1	1	-1.88248	107.727	396.772
Mfsd14b	1	-1.88235	1482.48	5449.7
Cdca4	1	-1.88203	522.638	1927.23
Lgmn	0.999999	-1.88139	813.644	2976.23
Exoc8	1	-1.88095	788.829	2907.69
Arhgdib	0.998762	-1.88086	1902.74	6894.53
Ostc	1	-1.8804	1127.1	4125.46
Pmpca	1	-1.87993	1166.13	4257.6
Cmc1	1	-1.87976	109.531	404.412
Tomm7	1	-1.87951	860.107	3164.95
Arhgef28	1	-1.87798	1555.26	5692.97
Jmjd6	1	-1.87635	520.712	1908.06
Uqcrfs1	1	-1.87124	948.642	3469.44
Rpl36	1	-1.87013	1995.09	7275.99
Hexb	1	-1.86848	998.619	3636.96
Ldha	0.999906	-1.86776	15927.1	57403.5
Adprhl2	1	-1.86708	317.349	1153.59
Aars	1	-1.8641	1594.17	5781.69
Tsen34	0.959921	-1.86289	896.792	3188.94
Cyld	1	-1.86223	876.818	3166.09
Rheb	1	-1.86148	1360.06	4919.25
Glmp	0.961361	-1.86024	1734.72	6138.68
Smim11	1	-1.85969	177.345	645.249
Med7	1	-1.8596	282.991	1025.65
P2ry1	1	-1.85957	268.5	976.256
Rgl2	0.999965	-1.85919	977.851	3512.86
Prorsd1	1	-1.85779	84.9421	310.493
Slc35b2	0.963664	-1.85759	661.372	2337.94
Comt	0.999999	-1.85634	926.735	3328.91
Bcl6b	0.999977	-1.85575	2718.52	9741.79
Lhfp	1	-1.85455	970.532	3484.87
Tbca	1	-1.85439	903.427	3256.14
Ndufa5	1	-1.85205	461.704	1664.09
Pskh1	1	-1.85079	487.136	1750.38
Tm6sf1	0.998119	-1.85022	985.122	3504.47
Fam114a1	0.996554	-1.8487	502.426	1783.12
Spns1	1	-1.84726	551.31	1972.68
Naa20	1	-1.84702	535.923	1926.95
Gnl1	0.999967	-1.84594	689.901	2454.37
Mrps14	1	-1.84553	655.456	2341.51
Chchd1	1	-1.84505	483.227	1736.2
Cables1	1	-1.84388	400.209	1431.38
Ube2v2	1	-1.84208	481.892	1722.82
Timm17b	0.999999	-1.83912	338.494	1202.93
Wwp1	0.99874	-1.83813	1691.02	5951.18
Med18	1	-1.83791	150.895	538.042
Prkaa1	1	-1.83778	1276.95	4551.63
Aup1	1	-1.83604	812.41	2884.4
Mvp	1	-1.83311	2290.55	8147.81
Pold4	1	-1.83077	220.918	787.458
Eif2d	1	-1.83029	728.274	2575.16
Atp6ap2	1	-1.82981	1551.68	5505.96
Atp8b1	0.996306	-1.82961	522.953	1833.53
Akt1	0.999858	-1.8294	3231.73	11348.2
Commd9	1	-1.82446	263.753	930.387
Clpp	0.99236	-1.82386	415.084	1441.79
Oaz1	1	-1.82189	3120.94	11003.2
Gpr137	1	-1.82168	251.77	887.068
Cnksr3	1	-1.82103	613.177	2165.7
Bnip1	1	-1.82075	184.52	652.401
Fitm2	1	-1.82071	511.797	1797.1
Fam120a	0.999976	-1.81818	3535.54	12332.7
Atp6v1c1	1	-1.81395	1236.69	4325.22
Pisd	1	-1.81369	1548.75	5420.77
Gch1	1	-1.81287	777.181	2718.07
Dlat	1	-1.807	777.14	2717.59
Serpinh1	1	-1.8065	12836.9	44618.6
Ndufa4	1	-1.80642	1099.87	3833.48
Hilpda	1	-1.80609	189.589	663.568
Amdhd2	0.98709	-1.80529	296.577	1018.95
Atf4	0.99215	-1.8041	3844.29	13162.2
Crim1	0.992839	-1.80338	15102.2	51787.3
Cav2	0.999962	-1.80302	9699.03	33476.1
Mgat2	1	-1.8012	1888.26	6576.06
Rpl7l1	1	-1.80094	1162.36	4045.01
Acta2	0.957619	-1.79968	8168.89	27730.3
Apool	0.999998	-1.79967	228.229	791.142
Coq10b	1	-1.79849	1078.2	3727.59
Eef2kmt	1	-1.79418	167.309	581.54
Cyp2j6	1	-1.79297	376.33	1302.32
Ndufb5	1	-1.79224	794.351	2750.36
Sra1	1	-1.79188	748.776	2588.06
Sqle	1	-1.79174	424.867	1471.53
Cox15	1	-1.79117	498.198	1721.43
Pdk1	0.999998	-1.79051	605.434	2079.12
Ptges2	0.999994	-1.78958	302.475	1037.21
Psmb6	0.999999	-1.78954	2189.83	7513.73
Tm2d1	0.999934	-1.78937	335.13	1147.12
Il17rc	0.99907	-1.78636	349.597	1191.06
Sec61b	1	-1.78311	874.867	3002.1
Tex264	1	-1.78181	872.207	2988.51
Uxt	1	-1.78115	191.2	654.788
Hspb1	1	-1.78091	9491.49	32433.7
Rab35	1	-1.78084	1182.28	4056.49
Pitpnm1	0.999995	-1.78031	323.475	1103.72
Eid2	1	-1.77935	187.301	644.3
Ube2a	0.999999	-1.77912	495.368	1687
Gtpbp3	1	-1.77803	189.874	651.413
Ugcg	1	-1.77651	790.756	2703.79
Taldo1	1	-1.77499	5625.35	19235.7
Ugp2	1	-1.7744	641.908	2192.24
Rpl5	0.995134	-1.77416	304.558	1026.2
Pkm	1	-1.77395	24579.9	83762.1
Camk1	0.971606	-1.77314	1101.89	3688.89
Tmem183a	1	-1.77033	706.689	2404.99
Ndufaf8	0.996517	-1.76844	182.313	612.371
Chpf2	1	-1.7663	1476.32	4994.65
Smim20	0.991154	-1.76346	188.844	631.718
Foxk2	0.998555	-1.75982	1063.65	3543.11
Alkbh2	1	-1.75906	68.8095	234.962
Lsm8	1	-1.75673	403.936	1361.43
Polh	0.997534	-1.75536	392.495	1306.74
Rnf25	1	-1.75096	144.605	487.201
Elof1	1	-1.75074	469.371	1578.81
Dnal4	0.999954	-1.75055	194.564	650.907
Nenf	0.99716	-1.74957	395.85	1314.12
Zfp367	1	-1.74915	457.885	1531.16
Dpm1	1	-1.74813	419.251	1406.51
Vps37c	0.996943	-1.74549	415.336	1372.39
Insig1	0.999768	-1.74338	1347.92	4468.25
Plekhb2	0.999264	-1.74248	1197.95	3953.27
Sco2	0.999985	-1.7418	128.762	428.326
Cox17	0.999844	-1.73515	825.07	2714.81
Ranbp1	1	-1.73296	1220.77	4040.27
Snx10	0.996945	-1.73208	557.332	1827.49
Emc1	1	-1.73135	3024.19	9975.69
Actr3	0.996711	-1.73072	9176.34	29960.9
Aco1	1	-1.73035	1077.41	3568.66
Katnbl1	1	-1.7299	665.875	2205.35
Utp18	0.999985	-1.72914	428.617	1410.4
Atxn7l3	0.999993	-1.72906	570.873	1877.54
Ipo5	0.991374	-1.72782	2196.1	7130.53
Pxn	0.999521	-1.72695	2644.64	8653.95
Fam136a	1	-1.72662	453.055	1498.73
Usp14	0.99975	-1.72625	1196.72	3908.85
Dhrs7b	0.999995	-1.72512	314.441	1032.52
Fbln2	0.996426	-1.72489	1544.89	5043.36
Itgb1	0.999743	-1.72483	32380.5	105806
Perp	1	-1.72296	404.076	1328.43
Ptpn9	1	-1.72217	641.009	2101.36
Siva1	0.974482	-1.72213	350.198	1133.22
Anxa1	1	-1.72007	1987.71	6529.89
Sae1	0.989024	-1.71402	1144.85	3685.89
Zswim7	1	-1.71205	67.2358	221.84
Map2k4	0.999841	-1.71125	1996.84	6458.77
Tubb4b	1	-1.70752	6160.11	20084.3
Tmem168	1	-1.70549	1408.12	4590.8
Alg5	0.979955	-1.70441	455.475	1453.74
Nudt4	1	-1.70348	1317.04	4280.36
Pfdn4	0.999997	-1.70347	282.211	913.162
Rpl8	1	-1.70289	5624.65	18196.3
Dohh	0.990881	-1.70278	530.322	1697.85
Shmt2	0.979386	-1.69939	586.002	1864.66
Dbndd2	0.977866	-1.69753	434.279	1375.39
Capn1	1	-1.69708	552.709	1791.66
Tbcb	0.99993	-1.69398	1006.33	3226.75
Ubqln1	1	-1.69201	2522.95	8134.55
Nup205	0.999986	-1.69181	966.292	3095.45
2019-09-08	1	-1.69119	1309.39	4218.89
Snx8	1	-1.69109	331.789	1069.21
Ostm1	1	-1.69089	1263.25	4061.44
Relb	0.999654	-1.69069	458.003	1464.65
Akap12	0.99655	-1.6902	23127.1	73565.9
Arl8a	0.97593	-1.6885	621.546	1959.38
Gng11	0.98317	-1.68838	2598.61	8253.22
Lsm10	0.997128	-1.68829	216.955	690.924
Ngdn	1	-1.6869	445.787	1436.85
Ppil1	0.991065	-1.68673	198.76	630.706
Ube2f	1	-1.68616	710.896	2281.51
Mettl21a	0.999987	-1.68131	178.312	569.258
Rpl12	0.999934	-1.68058	277.768	882.453
Snx24	1	-1.67924	318.315	1016.82
Dtnbp1	0.999966	-1.67803	414.868	1316.72
Uba52	1	-1.67685	2263.63	7232.93
Ppat	1	-1.67599	401.556	1276.87
Cant1	1	-1.67416	806.529	2568.05
Mthfd1	1	-1.67407	360.66	1150.87
Slc35b1	1	-1.67405	963.912	3074.16
Mrps7	1	-1.67281	591.596	1882.06
Spryd3	1	-1.6673	776.048	2455.76
Ube2z	1	-1.6667	1922.52	6083.07
Atg4d	0.999995	-1.66647	300.766	948.899
Nid1	0.989612	-1.66498	9065.46	28280.1
Ube2g2	0.984586	-1.6643	1291.64	4021.29
Map1lc3b	0.95799	-1.66428	3714.18	11537.3
Desi2	1	-1.66345	1151.31	3630.97
Eif2s1	1	-1.66205	1696.85	5351.11
Bbip1	1	-1.66082	457.854	1445.49
Tmem184c	1	-1.65877	341.096	1073.69
1110032A03Rik	1	-1.65815	166.819	527.312
Mvb12a	0.985737	-1.65762	449.227	1394.17
Snx9	1	-1.65395	1784.11	5609.7
Ldlr	1	-1.65267	1710.48	5374.27
Hdac3	0.999992	-1.65178	534.108	1666.75
Rps10	0.999958	-1.6501	3384.68	10522.1
Tnfaip8	0.996168	-1.65008	340.119	1056.12
Slc35e1	1	-1.64967	1493.41	4669.87
Lasp1	0.98726	-1.6487	5545.21	17113.5
Uchl3	1	-1.64826	199.669	627.086
Bloc1s1	1	-1.64794	448.915	1401.37
Ndufc2	0.990991	-1.6476	1081.68	3337.11
Gtpbp8	1	-1.64553	167.804	526.245
Chrac1	1	-1.64501	324.569	1013.05
Rps5	0.999999	-1.64498	5666.69	17600.4
Ltn1	1	-1.64488	1115.89	3474.9
Tie1	0.986097	-1.64483	7598.46	23440.9
Txnl1	1	-1.64421	1622.32	5063.45
Pin4	1	-1.64307	220.068	688.317
Cdpf1	0.999998	-1.64287	93.7443	292.882
Prelid1	0.999989	-1.64165	3571.11	11052.4
Ythdf2	1	-1.64099	1221.94	3796.48
Dnajb1	1	-1.64046	1123.99	3497.15
Endod1	0.991871	-1.63869	5804.22	17801.6
Pebp1	1	-1.63725	1993.26	6194.88
Pdzd11	1	-1.63713	562.661	1745.18
Selenoo	0.999874	-1.63627	292.312	902.845
Dars	1	-1.63552	1426.36	4431.25
Mrpl46	1	-1.63417	252.856	783.986
Btf3l4	1	-1.63368	453.764	1408.51
Brcc3	1	-1.63352	516.958	1603.07
Atp5o	1	-1.6325	1744.41	5391.6
Gpx4	0.999999	-1.63217	5158.17	15890.5
Clic4	1	-1.63146	22772.2	70304
Rad23a	0.999995	-1.63015	761.962	2341.42
Smurf1	1	-1.62909	2160.88	6640.38
Nagpa	1	-1.62872	298.011	921.072
Sh3glb2	0.996994	-1.62788	460.968	1409.56
Rexo2	0.995924	-1.62752	1847.78	5629.04
Dgat1	0.998922	-1.62557	208.34	637.29
Ctbs	0.999291	-1.62331	455.256	1389.39
Fndc3b	0.999522	-1.62215	3741.32	11392.3
Spats2	1	-1.62029	374.596	1152.57
Stk17b	0.997053	-1.6201	667.859	2027.43
Vta1	1	-1.61928	417.799	1281.92
Ddx56	1	-1.61913	614.245	1878.05
Shoc2	1	-1.61818	1929.15	5904.93
Tmsb4x	1	-1.61727	78308.7	239791
Hsdl1	0.99965	-1.61127	880.756	2664.44
Gtf2f2	1	-1.61107	319.415	976.85
Dguok	0.999999	-1.60993	264.192	803.452
Selenof	1	-1.60935	7409.82	22549.8
Gtf3a	0.996872	-1.60793	348.834	1050.66
Mrps30	0.999978	-1.60607	446.329	1350.59
Tsr1	0.999968	-1.60594	308.004	930.454
Zfp64	1	-1.60536	230.861	702.553
Stx6	1	-1.60507	1384.62	4196.47
Mrrf	0.991495	-1.60342	908.101	2709.31
Pnp	0.999993	-1.60264	1625.73	4907.23
Ghitm	1	-1.60219	4212.82	12764.9
Snx7	1	-1.59989	524.657	1588.94
Rpl31	0.992064	-1.59857	3810.62	11362
Rab34	0.999977	-1.59565	227.494	683.45
Fam120b	1	-1.59537	613.592	1855.26
Lims1	1	-1.59515	5164.86	15541.7
Pdcd6	1	-1.5946	1021.97	3084.84
Myg1	1	-1.59087	206.026	620.381
Ddhd2	0.999951	-1.58954	376.386	1124.24
Cct2	0.997712	-1.58837	3398.76	10103.2
Fam177a	1	-1.58779	2002.54	6013.4
Map6	0.999982	-1.5868	661.959	1972.57
Map4k5	1	-1.58677	2180.24	6545.98
Mrpl30	1	-1.58643	618.539	1855.5
Nkiras2	1	-1.586	799.218	2391.94
Ctsb	0.984534	-1.58513	9124.16	26986.9
Crk	1	-1.58454	4756.03	14175.4
Prdx1	1	-1.58402	5083.35	15156.8
Mrpl22	0.972148	-1.58326	195.646	576.283
Ap2s1	1	-1.5817	936.527	2788.68
Coq4	0.999986	-1.58063	179.697	535.36
Tusc3	1	-1.58017	857.342	2562
Zfp787	1	-1.57971	338.326	1009.55
Chsy1	0.999982	-1.57797	1269.74	3765.14
Coq2	0.999983	-1.57796	424.605	1260.22
Cdk6	0.999999	-1.57728	1335.46	3958.94
Gpat4	1	-1.57681	1536.33	4560.26
Timm8a1	1	-1.57669	311.846	929.237
Tmem64	0.99981	-1.57652	1151.79	3404.69
Cyb5r1	1	-1.57565	686.728	2036.08
Cnn2	0.999634	-1.57506	7547.29	22247.8
Armcx3	1	-1.57453	843.137	2506.57
Hmbs	0.979218	-1.57438	332.904	975.711
Rex1bd	0.999256	-1.57363	473.709	1395.23
Urm1	1	-1.57342	475.928	1411.72
Pef1	0.989983	-1.57289	854.549	2506.07
Dmac1	1	-1.57017	275.345	819.045
Dcaf10	1	-1.56974	929.023	2755.54
Cdr2	1	-1.56888	863.533	2548.57
Rps19	1	-1.56856	5135.28	15224.7
Trmt1	1	-1.56818	491.544	1452.68
Ralb	1	-1.56761	2812.37	8299.29
Mrpl43	1	-1.5669	488.909	1449.18
Colgalt1	1	-1.56649	4599.72	13580.5
Gorasp2	0.99556	-1.56489	2339.88	6834.59
Dcbld2	0.998937	-1.5645	2036.18	5947.06
Ndufs4	1	-1.5641	811.075	2394.32
Mrpl15	1	-1.56302	782.088	2301.07
Dnajc30	0.955058	-1.56251	293.835	850.857
Ccdc126	1	-1.56227	285.401	841.397
Rgs16	0.983608	-1.56059	1024.98	2965.29
Map3k10	0.999999	-1.56015	357.243	1049.2
P2ry2	1	-1.55785	334.626	985.661
Tmem222	0.999871	-1.55678	484.148	1413.86
P4ha1	0.999761	-1.55601	2566.73	7477.95
Tor2a	1	-1.55531	213.056	627.014
Ado	1	-1.55202	940.189	2745.16
Tmem205	0.955452	-1.55171	393.898	1133.52
Vapa	1	-1.55108	2371.22	6944.44
Ggcx	1	-1.55091	465.9	1361.9
Pepd	0.999997	-1.54884	612.546	1781.08
Aktip	1	-1.54854	887.572	2595.75
Uck1	1	-1.54778	329.989	961.849
Mthfsd	1	-1.54687	318.854	930.029
9530068E07Rik	0.999991	-1.54653	2370.42	6880.43
Asnsd1	1	-1.5463	704.792	2050.99
Cab39l	1	-1.5446	642.203	1874.08
Psmc3	1	-1.54457	2338.5	6806.18
M6pr	1	-1.54322	7620.83	22181.5
Snrnp25	0.976747	-1.54258	137.005	393.175
Stk25	1	-1.54136	1425.2	4146.9
Man2a1	0.988311	-1.54113	2284.78	6558.73
Nme6	1	-1.54027	173.082	503.362
Leprotl1	1	-1.54015	1406.17	4075.25
Anxa7	1	-1.53969	4815.56	13967.2
Josd2	0.999924	-1.53844	219.875	635.076
Atp6v0e	0.980774	-1.53832	3059.14	8768.33
Esrra	1	-1.5374	258.533	749.965
Klf6	1	-1.53653	14638.8	42419.5
Pmf1	1	-1.53646	91.4085	266.285
Fig4	0.999999	-1.53368	691.764	1991.61
Ran	0.999249	-1.53253	3612.16	10343.5
Sdcbp	0.999996	-1.53238	12728.2	36602.1
Cpq	0.986169	-1.52986	636.369	1813.78
H2afz	0.990688	-1.5272	1840.52	5238.01
Sqstm1	1	-1.52683	8276.19	23765.4
Pitrm1	1	-1.52611	1091.84	3134.62
Tbrg1	1	-1.52548	2047.56	5886.54
Npepl1	0.999261	-1.52512	818.123	2333.73
Grk6	1	-1.52471	1141.18	3281.35
Ndufb4	0.999982	-1.52441	476.767	1362.8
Dap3	1	-1.52386	641.304	1844.45
Ssu72	0.994888	-1.52344	1977.57	5618.69
Tmem128	0.999998	-1.52205	690.457	1973.13
Psmd5	1	-1.52013	1296.19	3707.88
Naxd	1	-1.51933	529.994	1513.61
Msra	1	-1.5188	180.063	516.712
Rpl38	1	-1.51755	3317.59	9473.08
Eif3l	1	-1.51742	1868.16	5328.01
Tox4	1	-1.5171	1452.56	4158.29
Vim	1	-1.51669	29459.9	84043.8
Edc4	1	-1.51667	744.156	2119.46
Gpn1	0.999912	-1.51577	582.885	1652.22
Sdhd	1	-1.51431	1759.44	5009.69
Smim7	1	-1.51365	1923.32	5472.1
Rpain	0.995423	-1.51235	99.0392	281.14
Nup35	1	-1.51123	380.315	1083.33
Zfp954	1	-1.51096	172.759	493.36
Colec12	0.995539	-1.51068	788.938	2225.87
Pck2	0.997696	-1.50978	553.587	1561.03
Lamtor4	0.999995	-1.5054	321.479	908.844
Rps17	0.999581	-1.50481	5304.16	14919.1
Sar1b	1	-1.50418	988.811	2794.72
Mical1	0.999562	-1.50368	848.065	2386.06
Lrrc14	0.999797	-1.50367	411.821	1159.43
Arf6	1	-1.50318	3757.64	10620.8
Vamp5	0.999996	-1.50226	323.175	911.417
Pithd1	1	-1.50168	196.396	557.181
Flad1	1	-1.50121	267.659	755.204
Sugt1	0.999547	-1.50017	1488.83	4171.38
Hsbp1	0.999999	-1.4998	1387.29	3900.62
Immp1l	1	-1.49935	445.536	1261.31
Ppp1r15a	0.97277	-1.4978	2255.44	6252.88
Nit2	1	-1.49629	222.336	629.063
Fau	1	-1.49587	3336.38	9362.19
Hps4	0.999917	-1.49378	184.244	516.878
Wipi2	1	-1.49258	2629.68	7392.69
Slc25a25	0.999789	-1.49187	1038.78	2898.57
Smarcb1	0.999222	-1.4897	873.824	2430.04
Smim8	0.999979	-1.48889	123.958	347.266
Usp5	0.999947	-1.48869	1406.88	3919.98
Sike1	1	-1.48817	1523.45	4268.92
Ddt	0.999976	-1.48693	219.975	613.609
Hace1	1	-1.48586	415.693	1164.3
Zfyve27	1	-1.48581	516.416	1442.22
Edem2	0.998706	-1.48483	636.465	1764.8
Qtrt1	0.999992	-1.4845	109.52	306.125
Plxna2	1	-1.48328	6382.45	17793.1
Gnb5	0.999999	-1.48143	260.323	724.748
Cox6b1	1	-1.48039	2036.11	5666.12
Gdpd1	0.999974	-1.47587	302.945	838.001
Hacd4	0.99954	-1.47403	447.365	1232.79
Ipo4	0.997806	-1.47309	1033.06	2834.39
Chchd2	0.998371	-1.47072	4063.87	11153
Cemip2	0.981169	-1.47055	1083.39	2963.92
Yars2	1	-1.47042	158.686	440.858
Ppp1r11	1	-1.46982	1344.42	3715.32
Dhx33	1	-1.46687	507.272	1398.23
Cs	0.998924	-1.46626	3761.34	10287.5
Polr3k	1	-1.46625	616.878	1702.01
Wls	1	-1.46517	2725.98	7486.82
Mtx1	1	-1.46516	464.701	1279.85
Chac2	1	-1.46144	82.4976	228.205
Rhbdd1	1	-1.45999	1136.94	3122.52
Tmtc3	0.999626	-1.45954	1247.03	3397.31
Plekhf2	0.999969	-1.45901	700.487	1912.35
Tbc1d23	0.993697	-1.4585	844.118	2294.34
Vac14	0.995028	-1.45784	776.737	2106.62
Dars2	1	-1.45712	259.214	713.483
Nceh1	1	-1.45682	639.219	1750.92
Tamm41	1	-1.45351	132.865	363.795
Derl2	1	-1.45282	1115.51	3046.99
Trappc2l	0.998189	-1.45042	593.91	1607.31
Rft1	1	-1.44951	373.739	1022.37
Nt5m	1	-1.44938	155.522	426.205
S100a13	0.999247	-1.44876	1064.75	2884.9
Rab33b	1	-1.44828	797.821	2171.24
Gart	1	-1.4475	749.846	2041.11
Gm16286	0.998157	-1.44692	1821.34	4913.61
Med10	0.996483	-1.44392	681.532	1833.39
Txndc9	1	-1.44364	1447.59	3934.79
B230307C23Rik	1	-1.44327	124.591	339.088
Tpm4	1	-1.43999	23811	64423.3
Ciao2a	1	-1.43874	710.248	1920.53
Raph1	1	-1.43864	1336.49	3620.62
Wdr55	1	-1.43861	221.172	600.505
Sphk2	0.998403	-1.43693	530.669	1423.15
Atpaf2	1	-1.43644	336.509	910.291
Sgms2	0.990314	-1.4324	4060.49	10807
Eef1akmt1	0.996728	-1.43204	231.659	619.213
Agpat4	0.999994	-1.43181	585.685	1571.84
Fundc1	1	-1.43146	571.855	1540.77
Tkt	1	-1.43	1935.47	5204.75
Rap2a	0.998629	-1.42984	1096.25	2921.51
Mtap	1	-1.42888	1054.89	2832.32
Def8	0.993103	-1.4273	474.781	1262.55
Ppp1r2	1	-1.42718	5707.22	15340
Stt3b	1	-1.42683	4390.33	11764.1
Ppp2ca	1	-1.42676	3990.99	10730.4
Usb1	0.989531	-1.42641	259.882	690.239
Sh3bgrl	1	-1.42623	9889.5	26518.1
Pex6	0.998079	-1.42429	579.611	1541.88
Rp2	1	-1.42296	448.393	1198.41
Mapk1ip1l	0.997055	-1.42282	1690.15	4476.87
Ndufa9	0.997903	-1.42273	1735.65	4609.2
Tmed7	1	-1.42257	3000.77	8034.92
Ap2m1	0.999969	-1.42253	4901.97	13054.3
Snx4	1	-1.42161	1533.99	4096.39
Myl6	0.999992	-1.42119	23364.1	62184.3
Fkbp3	1	-1.42078	720.465	1924.5
Rpl26	0.993531	-1.41998	5039.89	13355.3
Msto1	1	-1.41897	448.71	1197.5
Wsb1	0.99353	-1.41896	1520.68	4023.49
Sec22b	1	-1.41877	1205.47	3208.28
Uxs1	0.999998	-1.41874	430.245	1145.87
Miga2	1	-1.41805	345.502	921.63
Ccm2	0.982978	-1.41792	825.829	2178.32
Tctex1d2	1	-1.41723	137.123	367.099
Arfgap2	0.977394	-1.41639	879.093	2314.61
Psmd4	1	-1.41599	1550.35	4134.86
Rpe	1	-1.41548	703.602	1874.85
Lipo3	1	-1.41548	500.344	1334.26
4930453N24Rik	0.99589	-1.4141	1010.05	2660.78
Il4ra	1	-1.41356	1435.53	3814.77
Eif1b	1	-1.41323	440.077	1173.35
Dgke	1	-1.41196	854.945	2275.55
Rpl18a	1	-1.41189	6973.39	18486.3
Kremen1	1	-1.411	866.329	2302.8
Zfp560	0.999971	-1.41036	390.912	1033.77
Supt4a	1	-1.41019	446.785	1188
Rack1	0.984896	-1.40961	8044.29	21091.4
2019-09-02	0.999992	-1.40728	8567.3	22585.6
Hsd17b10	0.997104	-1.40615	491.685	1290.17
Xpo5	1	-1.40501	1262.38	3335.07
Tsc22d4	1	-1.40402	422.699	1115.07
Cpsf4	1	-1.40392	251.846	667.243
Pip4p2	0.999999	-1.4036	1278.83	3369.45
Higd2a	0.998163	-1.40298	978.146	2564.36
Edem1	0.999973	-1.39959	1523.62	3993.56
Sap30	1	-1.39956	144.098	380.651
Dr1	0.999997	-1.39753	974.92	2553.69
Tiprl	1	-1.39715	897.488	2354.02
Eloa	1	-1.39584	1766.07	4640.32
Ddx52	0.997839	-1.3953	629.901	1641.46
Txnrd1	0.999465	-1.39471	2654.82	6912.62
Trappc2	1	-1.39186	647.471	1700.54
Arpc3	0.989351	-1.39184	3687.62	9584.76
Capza1	0.999827	-1.39146	5933.82	15446.7
Mex3c	1	-1.39092	1783.48	4660.51
Mtpn	1	-1.38973	9532.83	24870.7
Stoml2	1	-1.38853	792.912	2071.52
Mrpl53	0.97919	-1.38808	497.022	1282.26
Mus81	1	-1.3874	261.237	682.56
Mrps35	0.971407	-1.38731	310.782	804.005
Zswim4	0.999672	-1.3871	822.178	2136.48
Nifk	1	-1.38618	636.67	1661.32
Smap2	0.999388	-1.38512	746.19	1933.62
Sms	0.999838	-1.38426	537.49	1395.63
Tmbim1	1	-1.38249	3771.54	9811.18
Rplp2	0.99999	-1.38176	4407.89	11415.3
Zc3h10	0.997451	-1.38116	307.451	794.291
Tgfbr2	0.985642	-1.37959	13658.6	35189.4
Ssr3	0.999989	-1.37861	5765.17	14890.8
Psma5	0.999956	-1.37771	1657.18	4279.09
Map4k3	1	-1.3777	3031.99	7856.59
Tbl3	0.995678	-1.37534	736.685	1894.26
Gmfb	1	-1.37394	3102.37	8037.91
Elp5	0.999997	-1.37391	759.33	1958.43
Tpd52l2	0.999998	-1.37374	1986.1	5124.35
Akirin2	0.999974	-1.37044	1191.5	3060.47
Trim23	1	-1.37019	489.108	1260.42
Ttpal	1	-1.36965	906.136	2336.21
Cyb561a3	0.995394	-1.36767	496.719	1270.48
Tsn	1	-1.36754	1956.65	5029.73
Alkbh1	0.999991	-1.36601	150.662	388.101
Klhl9	0.999439	-1.36199	3490.01	8905.32
Tm9sf3	1	-1.36072	13797.6	35407.6
Bzw2	1	-1.35994	426.712	1093.16
Pomt2	1	-1.35881	655.58	1680.62
Klhdc2	1	-1.3579	794.415	2034.04
Atg9a	0.989164	-1.35741	922.799	2338.27
Gnl3	0.980532	-1.35464	404.187	1020.24
Zfp598	0.999828	-1.35365	429.492	1090.59
Ern1	0.980764	-1.35134	1136.96	2861.2
Coasy	0.999239	-1.3494	329.271	833.971
Nipa1	0.999998	-1.34825	443.194	1124.24
Nfkbil1	0.999986	-1.34806	137.277	349.524
Dolk	0.999853	-1.34739	633.063	1600.23
Schip1	0.999986	-1.34566	690.087	1744.03
Cdc42se2	1	-1.34491	2736.56	6935.38
Hint1	1	-1.34478	2693.78	6822.91
Slc25a4	1	-1.34271	5792.88	14672.3
Drg2	1	-1.34202	712.675	1802.01
Timm22	1	-1.34196	599.34	1516.19
Cyb5b	0.999991	-1.34115	4670.71	11771.5
Ap3m2	1	-1.34099	583.084	1476.03
Ikbkg	1	-1.33769	1260.29	3178.54
Fuom	0.974254	-1.33396	42.5787	107.716
Dut	0.964789	-1.33309	165.734	414.249
Itfg1	0.999849	-1.33259	3141.82	7869.72
Ndufaf6	0.998613	-1.33227	78.8021	198.245
Ryk	1	-1.33158	1612.33	4051.09
Pcgf5	0.99908	-1.33072	919.639	2292.63
Pacs2	0.995142	-1.3297	1000.58	2487.54
Pus10	0.999756	-1.32956	269.318	673.332
Pcdh1	0.999923	-1.32813	5878.91	14665
Sub1	1	-1.32732	1221.71	3057.64
Plod1	0.999987	-1.32717	3191.83	7962.63
Ormdl2	1	-1.32585	399.205	1002.31
Thoc3	0.99946	-1.32504	892.226	2220.24
Rps11	1	-1.32388	5204.63	13007
Mrps33	0.999941	-1.32306	507.679	1263.94
Wrb	0.999843	-1.32033	602.083	1495.07
Mlf2	0.98339	-1.32029	3420.08	8445.99
Slc25a46	1	-1.3202	1135.12	2835.61
Msmo1	1	-1.31987	1218.31	3040.4
Bcl10	0.999929	-1.31951	1932.19	4797.45
Fbxw8	0.999763	-1.31942	3096.16	7680.23
1110038F14Rik	1	-1.31884	313.372	781.149
Phtf1	0.997969	-1.31784	904.022	2235.69
Ranbp6	1	-1.31773	442.23	1103.42
C1galt1	0.970827	-1.31616	1819.17	4468.35
Mpc1	0.957489	-1.31536	1742.53	4288.23
Usp22	1	-1.31498	1909.18	4733.72
Ppp1r37	1	-1.31392	1204.55	2990.8
Cnppd1	1	-1.31293	1280.17	3180.37
Spag7	0.97091	-1.31248	792.937	1943.83
Poglut1	1	-1.31098	1210.32	2993.81
Pnpo	0.999795	-1.31	225.808	557.288
Pnpt1	0.999986	-1.30826	499.081	1231.42
Rpn1	1	-1.30577	2601.42	6430.59
Poldip2	0.999894	-1.30247	703.171	1723.86
Minpp1	0.999867	-1.30016	1017.22	2492.14
Ss18l2	1	-1.2996	194.792	479.606
Nup88	0.999448	-1.29911	1238.93	3023.68
Nmd3	0.982519	-1.29909	646.826	1569.45
Osgin2	0.999938	-1.29829	209.273	512.677
Entr1	0.999999	-1.29803	1188.29	2909.39
Selenos	0.999954	-1.29743	639.643	1563.65
Rtl8b	0.999938	-1.29732	981.371	2400.74
Efr3a	1	-1.29675	2080.59	5111.4
Nsun2	0.999869	-1.29669	1305.01	3183.06
Ppp2r5d	0.997642	-1.296	1177.81	2868.31
Alkbh3	0.998069	-1.29509	320.871	781.068
Tbc1d10b	0.999992	-1.29291	1303.44	3176.73
Kcmf1	0.999797	-1.29218	1777.16	4319.89
Med28	0.988122	-1.28975	1634.57	3958.09
3110040N11Rik	1	-1.28808	116.093	284.183
Mrpl44	1	-1.28576	422.435	1027.6
Rcn2	1	-1.28495	2077.33	5053.83
Yipf5	0.999942	-1.28311	1118.92	2706.68
Prkaca	0.999717	-1.28243	1239.1	2995.04
Commd3	1	-1.28101	1648.81	3997.38
Sgpl1	0.971181	-1.28036	1687.77	4050.68
Ube2n	0.961048	-1.2802	1379.52	3300.27
Mlx	1	-1.28009	333.901	810.941
Cops5	1	-1.27945	1109.37	2686.34
Emd	0.957875	-1.2789	551.062	1314.94
Tap1	1	-1.27783	529.237	1280.38
Mrpl35	0.998473	-1.27646	643.124	1547
Tmed3	0.999996	-1.27608	1253.55	3023.1
Cdk4	1	-1.27563	2157.52	5220.96
Nfs1	0.999529	-1.27337	591.134	1420.41
Fam92a	1	-1.27242	592.995	1430.88
Atp5f1	1	-1.27236	3824.1	9236.81
Chchd3	1	-1.2712	1019.17	2458.14
Abhd17b	1	-1.2708	739.589	1782.62
Pwp1	0.999982	-1.26776	763.986	1830.21
Tars2	0.997581	-1.26746	582.618	1392.47
Abhd13	1	-1.26713	1248.56	2995.7
Ptcd2	1	-1.26619	361.489	869.596
Atp6v1f	0.988917	-1.26548	1466.11	3489.96
Sdc2	0.998364	-1.26481	801.396	1910.24
Klhdc10	0.994494	-1.26367	1052.94	2503.56
Szrd1	0.999998	-1.26204	1435.61	3429.81
Ube2l3	0.999017	-1.26201	2174.79	5174.27
Trmt10c	1	-1.26112	446.546	1067.79
Phospho2	1	-1.26083	418.626	1002.81
Xxylt1	0.999993	-1.26017	742.792	1772.1
Tollip	0.997614	-1.2596	3460.75	8218.34
Faf1	0.995126	-1.25942	1329.27	3154.14
Nme2	1	-1.25765	4522.95	10807.4
Pomgnt1	0.996645	-1.257	1314.29	3118.2
Prdm4	1	-1.25258	581.431	1382.93
Imp4	0.998855	-1.25244	1185.85	2801.15
Slc38a7	0.997738	-1.25241	551.307	1304.44
Med6	1	-1.25188	291.946	694.762
Sntb2	1	-1.25108	1405.23	3333.51
Sc5d	1	-1.25044	1244.79	2956.75
Rcan1	0.999414	-1.2498	1259.84	2979.76
Tfdp1	1	-1.24971	844.698	2006.49
Wtip	0.998349	-1.24818	399.743	944.697
Gmps	0.999917	-1.24815	1867.31	4408.07
Plin3	0.998453	-1.24772	2156.91	5088.52
Zfand2a	0.987881	-1.24711	2467.65	5798.36
Zdhhc7	0.969127	-1.24669	722.866	1697.57
Mkrn2	1	-1.24657	820.008	1940.18
Bloc1s4	0.9999	-1.2464	249.102	589.281
Tex261	0.992261	-1.2458	2154.56	5064.82
Cdc42	1	-1.24565	15986.7	37829.2
Kpna3	0.999999	-1.24561	1315.75	3108.13
Dexi	0.999986	-1.24514	160.242	379.668
Psen1	0.998685	-1.24373	944.917	2220.17
Sirt5	1	-1.24094	276.418	653.413
Lyrm2	1	-1.24046	235.125	556.045
B4galt3	0.960665	-1.23949	316.193	739.37
Btf3	1	-1.23945	4561.58	10732.9
Magohb	1	-1.23904	128.484	304.556
Tspan4	0.999621	-1.23796	2078.81	4874.64
Klhl22	0.999933	-1.23746	457.36	1074.31
Snx17	0.997692	-1.23627	1534.08	3585.08
Nedd1	0.999653	-1.23598	571.372	1337.94
Htra2	1	-1.23594	445.333	1049.96
Cisd2	0.999723	-1.23382	925.136	2163.59
Ash2l	1	-1.23321	959.178	2251.89
Tmem219	0.999094	-1.23284	270.996	633.735
Llgl1	0.974392	-1.23239	1055.62	2453.12
Dtymk	0.994453	-1.2311	283.781	661.297
Wdr12	1	-1.23096	513.887	1202.67
Cltb	0.999967	-1.2306	3527.21	8235.07
Nif3l1	1	-1.23054	282.981	664.069
Tada1	0.999988	-1.23047	511.843	1197.18
Tspan9	1	-1.23014	4424.55	10370.8
Zfp672	1	-1.2276	639.275	1496.05
Gnai3	0.999997	-1.22618	5194.9	12102.3
Vps50	0.989186	-1.22485	764.465	1770.53
Pgs1	0.955022	-1.22443	1462.05	3381.87
Zdhhc8	1	-1.22296	742.116	1729.33
Ubac2	0.975398	-1.222	632.257	1461.72
Gtf3c3	1	-1.22125	607.521	1413.38
Vps28	0.975657	-1.22116	1422.27	3284.61
Zdhhc16	0.999968	-1.22109	504.594	1171.1
2410002F23Rik	0.998272	-1.22091	398.462	922.292
Cpne2	1	-1.21901	710.09	1651.98
Slc25a44	1	-1.21567	698.821	1622.89
Supv3l1	1	-1.21493	289.037	670.11
Sdad1	0.999999	-1.21425	363.579	842.262
Mrpl52	0.999514	-1.2122	312.988	722.025
Acbd6	0.999998	-1.21196	560.36	1294.08
Pde7a	1	-1.21079	276.374	640.794
Ppp2r5b	0.997527	-1.21039	743.072	1707.81
Vti1b	1	-1.21029	1575.56	3640.84
Gtf2e1	1	-1.20879	559.629	1292.41
Drg1	0.990656	-1.20721	1645.46	3770.2
Psmf1	0.991826	-1.20658	783.777	1793.55
Nmt1	0.997948	-1.20647	1807.58	4135.29
Hspb11	0.999991	-1.20607	146.716	338.319
Hif1a	0.999959	-1.20166	6618.58	15151.4
Unc45a	1	-1.20108	1183.16	2711.66
Ndufb10	0.994537	-1.19973	695.377	1585.85
Atp5b	0.999886	-1.19723	19066.5	43490.6
Mrpl17	0.967433	-1.19676	1102.52	2501.33
Mrpl58	1	-1.19656	420.133	961.196
Zfp655	1	-1.19615	1017.59	2325.44
Slc33a1	0.999624	-1.19568	917.406	2091.57
Mesd	0.999998	-1.19512	1704.44	3887.44
Fkbp8	0.999733	-1.19512	2893.55	6590.32
Dcaf12	0.99938	-1.19429	1716.93	3903.8
Srp54c	0.999459	-1.19412	1668.65	3795.43
Fdx1l	0.999817	-1.1926	342.796	779.918
Pomt1	1	-1.19175	237.219	542.767
1110059G10Rik	0.983945	-1.18545	238.206	538.074
Mfsd1	1	-1.18528	3037.18	6906.41
Cbx6	0.990934	-1.18509	2654.48	5982.5
Cnpy3	0.998543	-1.18453	716.328	1619.66
Lmf1	0.998639	-1.18363	330.518	747.297
Pla2g15	1	-1.1833	438.946	995.941
Agps	0.999617	-1.18287	2362.02	5327.54
Ugdh	0.993128	-1.18256	1294.42	2913.66
Cox6c	1	-1.18218	3708.68	8406.37
Fastk	1	-1.18166	541.37	1225.32
Thoc7	1	-1.18016	630.162	1428.35
Rps14	0.999993	-1.18	5863.72	13235.3
Ergic2	1	-1.17895	1490.99	3368.9
Pih1d1	0.998707	-1.17873	580.422	1306.76
Slc39a13	1	-1.17831	706.568	1596.78
Nop2	1	-1.17776	717.535	1623.72
Vsig2	0.968524	-1.17655	1112.04	2480.41
Dcun1d5	0.976377	-1.17614	1243.2	2778.02
Nhlrc3	0.998632	-1.17529	1099.03	2464.28
Samm50	0.999832	-1.17431	1429.25	3206.35
Sdr39u1	0.996032	-1.17381	357.605	801.199
Tmem230	0.96814	-1.17097	525.972	1171.85
Wrap73	0.983487	-1.1695	235.299	525.277
Hccs	1	-1.16942	480.468	1081.4
Zc3hc1	1	-1.16808	368.838	827.185
Fes	0.976496	-1.168	640.1	1427.42
C9orf72	0.999992	-1.16542	464.754	1039.23
Syde1	0.99965	-1.16528	1050.87	2342.23
Prps1l3	1	-1.16392	491.991	1101.98
Rap1b	0.99962	-1.16361	8295.46	18464.6
Tmed2	1	-1.16306	8230.78	18378.3
Tm9sf1	1	-1.16246	999.359	2232.6
Cdc16	0.999997	-1.16246	1576.11	3517.24
Cln5	0.999998	-1.16025	1274.31	2840.11
Pbdc1	0.997109	-1.15932	486.763	1078.74
Ptcd3	0.999994	-1.15766	640.856	1425.15
Zfp955a	0.999139	-1.15666	369.915	820.736
Tyw1	0.99912	-1.15353	526.387	1164.4
Alg9	0.98782	-1.15345	561.245	1239.06
Ncaph2	1	-1.15297	1581.39	3511.16
Hspa5	0.999993	-1.15175	9806.47	21711.9
B3gat3	1	-1.14897	419.217	928.188
Cyp20a1	1	-1.14822	1246.25	2761.01
Rrn3	0.999983	-1.14743	2394.76	5282.66
Fbxo25	0.991452	-1.14675	429.373	945.072
Tmem39a	1	-1.14674	284.748	631.444
Irgq	0.997424	-1.14477	890.53	1957.1
Uchl1	1	-1.14453	1540.46	3398.87
Pofut2	0.998305	-1.14325	1010.8	2220.67
Yeats4	1	-1.14323	393.655	869.35
Lonp1	0.999999	-1.14231	1668.03	3668.42
Park7	0.987218	-1.14109	1288.62	2817.9
Fbxo4	0.999994	-1.14059	333.454	733.96
Slc30a9	0.993556	-1.13935	1981.25	4331.73
B4galt1	0.989674	-1.13899	2842.18	6204.77
Neu1	0.999976	-1.13815	824.949	1809.24
Slc25a17	1	-1.13671	694.963	1524.77
Fkbp9	0.999991	-1.13629	4611.64	10102.8
Commd6	1	-1.13355	707.072	1548.44
Lzic	0.999998	-1.13349	439.552	962.535
2019-03-03	0.97616	-1.13338	288.26	628.679
Dctn2	1	-1.13202	2277.13	4980.4
Plgrkt	0.989455	-1.12983	232.376	504.541
Ovca2	1	-1.12869	333.429	729.267
Fyttd1	1	-1.12708	1657.83	3617.48
Man1b1	0.954087	-1.12376	1443.66	3111.6
Dcaf17	0.999464	-1.12136	474.06	1026.54
Ube3c	0.989952	-1.12024	2727.96	5873.26
Tmem30a	1	-1.11685	6637.86	14369.6
Polr3d	0.99997	-1.11672	256.811	556.203
Thop1	0.998194	-1.11424	420.546	904.819
Rabgef1	0.998357	-1.11405	563.796	1212.47
Mpc2	1	-1.11404	813.395	1760.79
Entpd4	0.995132	-1.11392	1940.12	4176.22
Rpl14	0.989933	-1.11361	4499.72	9663.41
Trim35	0.985667	-1.11332	3487.43	7490.97
Cpsf2	0.97769	-1.11329	1912.47	4099.68
Mrps25	1	-1.11285	488.106	1053.98
Sod2	1	-1.11199	1773.32	3825.17
Pofut1	0.99925	-1.10951	1093.46	2348.11
Mzt2	0.997628	-1.10856	187.142	402.027
Tbcd	0.999296	-1.10845	1942.96	4165.69
Cbr4	0.999882	-1.10789	276.32	594.186
Rspry1	1	-1.10684	1118.66	2409.07
Prmt3	1	-1.10623	336.886	726.032
Mrpl1	1	-1.10573	408.346	877.72
Ccdc58	0.977622	-1.10339	260.435	554.997
Ggta1	0.99087	-1.10147	1253.81	2670.73
Cgrrf1	0.999996	-1.10075	690.205	1476.79
Tmem14c	0.999677	-1.10004	1471.94	3138.83
Tmem60	1	-1.09973	345.903	740.888
Psmc6	0.991224	-1.09904	2129.48	4527.4
Gna13	1	-1.09832	2803.4	5999.09
Tor1aip2	1	-1.09762	4255.82	9082.82
Tut1	1	-1.09668	362.31	775.269
Rab11fip5	1	-1.09595	2327.93	4970.98
Pphln1	1	-1.09405	992.094	2112.89
Pfn2	0.995574	-1.09371	319.628	679.27
Mul1	1	-1.09311	677.435	1443.02
Cops4	1	-1.09077	1380.44	2935.19
Ripk2	0.999719	-1.09034	562.985	1193.57
Borcs6	0.999997	-1.08908	263.921	560.875
Snx21	0.999893	-1.08794	266.908	566.443
Slc10a3	0.999489	-1.08661	680.732	1440.27
Naa40	0.999972	-1.08643	721.744	1528.08
Gon7	1	-1.08432	114.724	244.577
Actr1b	0.999962	-1.08287	3147.59	6643.33
Ubqln4	0.992153	-1.08278	652.639	1372.79
Tm2d2	0.996218	-1.08183	1795.4	3774.99
Vcp	0.989477	-1.08057	11152.7	23410.5
Bpnt1	0.991616	-1.07907	660.362	1387.85
Cdk14	0.999997	-1.07625	875.943	1842.53
Ccnq	1	-1.07543	168.023	354.804
Pgrmc1	0.973699	-1.07347	4312.84	8988.75
Ech1	0.981633	-1.07297	977.406	2043.02
Gabarap	1	-1.07245	4463.52	9375.5
Usp30	0.987267	-1.07106	348.212	726.854
Cand1	0.981545	-1.07072	2578.17	5365.49
Ero1l	0.989472	-1.07019	2279.51	4744.39
Exosc8	0.997299	-1.06939	289.339	604.262
Aptx	0.99797	-1.06884	289.249	604.73
Ttc32	0.999995	-1.06811	137.522	288.908
Gm10053	0.99989	-1.06679	1712.25	3572.42
Hmgxb3	1	-1.06664	938.076	1960.86
Acot8	1	-1.06412	159.199	333.415
Heph	1	-1.0601	655.561	1364.8
Calu	1	-1.05989	13334.1	27745.5
Tmx1	1	-1.05809	1517.28	3155.09
Hikeshi	1	-1.05794	782.457	1626.66
Rbm43	1	-1.05768	313.529	652.984
Sf3b6	1	-1.05737	876.731	1823.96
Cdk7	0.999997	-1.05599	522.609	1084.32
Rpa1	1	-1.05486	1207.02	2508.03
Ubl5	1	-1.05418	1316.41	2727.7
Ppa1	0.999807	-1.05278	745.916	1540.83
Tmem214	0.999985	-1.05199	1291.15	2669.29
Snrpb	0.996176	-1.05074	2683.74	5527.93
Calm1	0.997138	-1.05061	25388.3	52333.7
Plaa	0.999924	-1.05013	1738.52	3584.69
Tmem63a	0.999876	-1.04963	882.801	1819.58
[truncated: 44 more rows]

## Sheet: E) All EC-enriched genes
Gene	adult_brain_ECs_TPM	p7_brain_ECs_TPM	p7_liver_ECs_TPM	p7_lung_ECs_TPM	p7_kidney_ECs_TPM	control_cultured_ECs_TPM	bcat_cultured_ECs_TPM
0610010K14Rik	25	32.5	16	50	51	41.5	23.25
1110038F14Rik	5.5	15	9	21.5	16	22.8333	19
1600002K03Rik	1.5	1.5	0	6.5	3.5	15.6667	8.75
1600012H06Rik	19	24	16	16	18.5	30.8333	24
1700017B05Rik	0.5	7	4	21	19	20.1667	23
1700025G04Rik	1	1.5	24.5	9.5	36	2.16667	2.5
1700037H04Rik	3.5	4	8	9	0	13	3.75
1810009A15Rik	6	8	11	7	4	51.8333	30.75
1810022K09Rik	56	31.5	20.5	35	59.5	153.833	104.25
2310011J03Rik	5	5.5	5	9	4	33.3333	19.5
2310033P09Rik	7.5	10.5	11	27	7	4.16667	5
2310057M21Rik	8.5	8.5	6	15	3	4.5	3.25
2510009E07Rik	29	37	29.5	29	27.5	9	12
2510039O18Rik	6.5	7	5.5	9	7	62.5	36.25
2610002M06Rik	2.5	3.5	2.5	13	12	4.5	4.75
2700081O15Rik	2.5	9	9	10.5	12	1.33333	1.5
2810006K23Rik	3	4.5	2.5	6	5.5	4.5	4.5
2900026A02Rik	12.5	16.5	4	10.5	10.5	27	33.75
3110040N11Rik	4	11.5	6	7	5.5	17.1667	13.5
4921524J17Rik	12	18	14	10	26	32.1667	29.25
4930402H24Rik	23	28.5	33.5	65	16	58.8333	98.5
4930453N24Rik	7	7	6.5	7.5	24	23.5	25.75
4930503L19Rik	11	21.5	34.5	39.5	41.5	14.3333	16
4930523C07Rik	30.5	46.5	8	73.5	24	21	22.75
4931406C07Rik	6	11.5	7.5	5.5	8.5	2.66667	3.75
4931406P16Rik	141.5	184	43.5	170.5	72	93.6667	139.5
4933427D14Rik	2	8.5	4	7.5	13	1.83333	2
6430548M08Rik	3.5	4.5	18	30.5	23	2.66667	4
8030462N17Rik	10.5	12.5	3.5	5	5	13.3333	15.5
9930012K11Rik	3	11	5	4	9	4.83333	4
9930111J21Rik2	13.5	3.5	6.5	18.5	17	13.5	32.75
A230050P20Rik	3.5	12	14	9	12.5	2.66667	2.5
A930033H14Rik	6	8	0	0	1.5	0.333333	0.5
Aak1	30.5	54	31.5	62.5	30.5	6.33333	9.25
Aamp	43.5	77	40.5	56.5	47.5	90.6667	52
Abat	0.5	8	19	1.5	0.5	1.5	1
Abca1	10.5	68	12	6	15.5	6.5	12
Abca3	12	11	3.5	14.5	7.5	31.3333	49.5
Abcb1a	1188.5	510	0.5	28.5	0	41.5	92
Abcb8	2.5	6.5	3	6.5	10.5	9.16667	6
Abcc3	0	0	1.5	2	6	3.66667	3
Abcc4	46.5	17.5	2	1.5	3.5	28.1667	20.75
Abcc5	12	35.5	28.5	27.5	14	8.83333	12.25
Abcc6	4.5	11.5	0	0	0	0.166667	0.5
Abcc9	11.5	1	23	0	3	0	0
Abcf2	13	15.5	5	16	16	38.8333	29.75
Abcg1	3.5	42	12.5	15.5	5	6.5	16.5
Abcg2	281	189.5	23	50	84.5	265	237.25
Abhd17a	7.5	39.5	7.5	25.5	11.5	250.333	100.5
Abhd17c	5	35.5	3.5	18	18.5	33.3333	17
Abhd2	114.5	83.5	2	15.5	3.5	38.3333	95.5
Abhd4	25	33.5	17	19	15.5	50.3333	28.75
Abhd5	48.5	78.5	14	37	38.5	41	48.25
Abhd6	11.5	19.5	5.5	3.5	4	12	6
Abi2	10	26	20	13	12.5	11.1667	11
Abi3	5	1.5	23.5	34.5	17	8.33333	13.75
Abl1	34.5	35	25.5	28	33	7.83333	11.5
Abl2	7	14	4	10	10	8.16667	16
Ablim1	320	215	2.5	122.5	21	48.1667	73.5
Abraxas1	2.5	7	3	6.5	4	4.16667	3.5
Abtb1	11.5	15.5	3	9.5	7	10.6667	6.5
AC115631.1	3.5	6	5	5.5	1	1.16667	3
AC140267.1	8	127.5	17	27.5	55.5	0.5	0
Acaa1a	7	14.5	3.5	9.5	21	37.1667	24.25
Acaa2	11.5	19	6.5	9	15.5	26.3333	13.75
Acacb	9.5	6	2.5	4.5	1	0.666667	1.25
Acad11	8.5	7	6.5	7	2.5	8.5	9
Acadl	38	76	24	40	37	43.6667	42
Acap2	30	34.5	28	73.5	61.5	13.8333	20.5
Acap3	6.5	28.5	14.5	56	39	7.16667	5
Acat2	1.5	7.5	3	12	4.5	12.6667	8.75
Ace	6.5	4.5	1.5	239	5.5	50.8333	97
Acer2	46.5	5.5	82	76	36	81.6667	88.5
Acer3	3	2.5	12.5	11	3.5	29.3333	22.5
Ackr1	35	2	16	0	0	4.66667	3.5
Ackr2	2.5	34.5	24	22	6	0	0
Ackr3	21	5	1.5	20	8.5	52.5	59.75
Acly	21	40.5	29	57	35	41.6667	41.25
Acnat1	2.5	11.5	0	0	1	0	0
Acot13	27.5	111	35	32.5	3.5	30.5	24.5
Acot7	1	18	2.5	21	7.5	86.3333	51
Acot9	21	24.5	13	26	34	154.333	103.75
Acox1	40.5	66.5	19	19.5	21.5	45	54.75
Acsf2	6	11.5	33	23.5	30	2.33333	2.5
Acsl1	12.5	21	4.5	8.5	10	5.83333	5
Acsl5	10	21.5	17	28.5	37.5	27.8333	30.25
Actb	2988.5	5090	1964.5	3512	3265	10140	7939.25
Actl6a	19.5	82.5	35.5	66.5	59.5	37.1667	27.75
Actn1	31	60.5	17.5	36.5	12	202	243.5
Actn4	348	388	189.5	376	286.5	228.833	138.75
Actr2	62.5	107.5	73.5	72	78.5	91.8333	133
Actr3	95	296	83	156	162.5	463.333	392.5
Acvr1	46	19	16	15.5	12	11.6667	10.75
Acvr1b	0	1	1	5	1.5	3	3.5
Acvr2a	29	8	8.5	12.5	13	12.3333	11.75
Acvr2b	5.5	3.5	0.5	2.5	8.5	1.16667	0.5
Acvrl1	170.5	56	6	283	88.5	338.667	289.75
Ada	0.5	0.5	3.5	3	16	3.16667	1.5
Adam10	173	160.5	44.5	51.5	85.5	47.1667	56
Adam15	112	48.5	29	94	92.5	136.833	150.75
Adam17	76	64	29.5	50	30	20.6667	25.75
Adam19	0	13.5	15	20.5	19	2.66667	2.5
Adam23	1.5	12.5	237.5	19.5	0	0.166667	0
Adam9	6.5	15	14.5	13	4.5	75.6667	83.25
Adamts1	54.5	13	37.5	117	83	65.3333	78
Adamts10	32	32	15.5	47.5	16.5	3.83333	4
Adamts4	0	4	6.5	1.5	8	8	8
Adamts9	6.5	21	9.5	27.5	26.5	9.16667	29.25
Adamtsl1	1.5	0.5	1.5	0	12.5	0	0
Adamtsl2	12	63	0	10.5	1.5	0	0
Adar	8.5	7.5	6.5	12.5	13.5	8	11
Adarb1	3	5	13	1.5	5.5	7.83333	12
Adck2	2.5	1	2.5	3.5	16.5	5.33333	3.75
Adck5	4.5	8.5	19.5	12	5.5	4.33333	2.5
Adcy4	33	38.5	59	26.5	19.5	98.1667	74
Adcy6	37	31.5	25.5	20.5	34.5	5.33333	12
Add1	90	175.5	110.5	164.5	128	95.8333	107.25
Add2	0	0.5	2	11	5.5	0.333333	0.75
Add3	54	30	52.5	74	27	18.3333	20.25
Adgra2	22	28.5	14.5	24.5	9.5	56.8333	115.75
Adgra3	12	91	2	156.5	8	8.66667	8.5
Adgre5	201.5	182	76	486	167	14.8333	15.75
Adgrf5	512	266.5	179	267	217.5	267.167	515.5
Adgrg3	1.5	4	35	5	11.5	3.33333	2
Adgrg6	1.5	4.5	6	12	1.5	9.83333	9
Adgrl1	2.5	17.5	5	35	6	0.833333	1
Adgrl2	90.5	127.5	88	252.5	81	26.8333	37.75
Adgrl4	1282.5	844.5	308	216	227	1035.83	1012.5
Adh1	9	10.5	0.5	20.5	0	1.5	0.5
Adipor1	31	44.5	20	18.5	13	196.833	147.75
Adipor2	22.5	14.5	6	17	16.5	49.1667	78.25
Adm	6	19.5	7	1.5	4.5	805.167	699.5
Adora2a	2	14	10.5	6.5	6.5	3.16667	1.25
Adpgk	5.5	8.5	5	8.5	5.5	15.3333	17
Adprh	7.5	21	6	14	9	33.5	18.25
Adprm	5	10	5.5	6.5	6.5	10.5	9.25
Adrb1	0	2	1.5	32.5	0.5	0	0
Adrm1	28.5	34.5	13	24.5	29	97.6667	51.25
Adsl	18.5	27	20	31.5	24.5	33.8333	19.25
Adss	42.5	57.5	22	34.5	48	51.3333	57
Aen	18.5	16	4	10.5	11	50.8333	42.25
Aes	135	69	53	123	79	229	216
Afap1l1	64	54	17	60	29	51.6667	70.75
Afap1l2	28.5	14	4.5	6.5	14.5	2.5	3.75
Afdn	264	389	101.5	301	241	45.8333	62.75
Aff1	14.5	10.5	13	9.5	10	8.66667	14.75
Aff3	0.5	1.5	0	32	0	5.33333	4.25
Afg3l1	13.5	33.5	14.5	18.5	31.5	21	15
Aga	3	6.5	3	6	6	39.1667	38.5
Agap3	15.5	35	18	35	21	30.1667	30.5
Agbl5	3.5	8.5	6	8.5	10	1.33333	1
Agfg1	55	42	8	41	16	44.3333	43
Agfg2	1	2	12	4	1	9.66667	9
Aggf1	13	14	15	14	16.5	18.5	21
Ago1	9.5	13	6	12.5	10.5	2.83333	5.75
Ago2	14	18	3.5	19	11	11.3333	10.75
Ago3	4.5	3	18	3.5	1	6	4.75
Ago4	0.5	2	1.5	3	7.5	0.166667	0.5
Agpat4	5.5	8.5	11.5	16	12.5	23.1667	15
Agpat5	3.5	5	11.5	4	3	74.3333	63.25
Agrn	65	154.5	18	85.5	70	9.33333	21.25
Ahcy	2	15	2	14.5	8.5	7.16667	6.5
Ahdc1	14.5	18.5	5.5	16.5	24	1.66667	5.25
Ahnak	120.5	28	17	66.5	42.5	184	348
Ahr	1.5	2.5	22	43.5	4.5	1.66667	1.25
Ahsa2	22	25	4.5	31.5	26	18	22.25
AI467606	15	2.5	0	1	1	7.83333	5.25
AI987944	6	8.5	7.5	5.5	10.5	11	11.5
Aida	43.5	55.5	36.5	52.5	81	45.5	75.75
Aif1l	99	111.5	0	30	70	13	13.75
Aimp2	2	4	5	2.5	6.5	59.5	27.5
Ajuba	2	7	3	6	4.5	43	19.25
Akap1	6.5	7.5	7	7.5	8.5	7.66667	8.25
Akap12	51.5	31.5	27	85.5	37.5	215	442.5
Akap13	38	59	19	69	56	27.3333	64.5
Akap2	108	101	47.5	66.5	58	87	137.75
Akap9	58.5	45	26	51.5	52	3.83333	8
Akirin1	16	21	12.5	12.5	24.5	46.3333	42
Akr1a1	315.5	370	145.5	281.5	229.5	488.5	388
Akr1b8	0	0	40.5	3.5	0	8.16667	6
Akr1c14	102.5	25.5	0	3	4	45	52.75
Akt1s1	27	26	18.5	13.5	27.5	73.5	47.5
Akt3	68.5	40.5	26.5	45.5	32	13.8333	23
AL731706.1	10.5	8	2.5	11	9.5	11.8333	9.25
AL731706.2	104	101	58.5	148.5	0	1	0
Alad	20.5	20.5	17.5	14.5	12.5	45.6667	31.75
Alas1	104	94.5	11.5	31	12.5	127	136
Aldh1a1	81.5	3	0.5	4.5	0	8.16667	17.75
Aldh2	345	55	91	185	20	75	146.5
Aldh3a2	25	29	14.5	36	10.5	28.8333	32
Aldh6a1	10.5	11.5	7	6.5	5.5	13	11.25
Aldh7a1	7	8	13	6	20	13.6667	14.25
Aldh9a1	34.5	45	12	15	12.5	11	7.75
Alg1	3.5	8.5	2.5	3.5	5	24.6667	16.25
Alg11	7	3.5	8.5	3	7.5	9	9.5
Alg12	1.5	8	3	3.5	8.5	5.83333	5.5
Alg14	14	13	6	8	6	24	18.75
Alg6	3.5	10.5	3.5	7	3.5	4	3.5
Alg8	2.5	3.5	3.5	3	10.5	7.83333	3.5
Alkbh5	17.5	21	10	14	16	26.5	31
Alox12	4	0	2.5	1.5	5.5	0.166667	0.5
Alpk1	1	3.5	9.5	0	4.5	1.33333	1.5
Alpl	54	1.5	0	2	5	0.333333	1.5
Als2	14.5	11.5	3	10	11.5	7.33333	9.25
Als2cl	30.5	5.5	8.5	17.5	18.5	7.5	9.5
Alyref	11.5	18.5	11	28	33	114.5	85.75
Amacr	4	8	7	0.5	4.5	4.66667	4
Amd1	79	44.5	13.5	79.5	18	30.6667	48.25
Amfr	106	91.5	35.5	63.5	65.5	151	104
Amigo2	3	1	5	6	2	2.83333	2.75
Ammecr1	1	7	1.5	3.5	4	8.66667	11.25
Amot	63	33.5	13.5	15.5	17.5	4	8.25
Amotl1	24	72	61	73.5	66.5	18.8333	36
Amotl2	71	36	57	101	58.5	90.1667	90.5
Ampd2	14.5	12.5	12.5	18	22.5	13.5	9.5
Amz2	16	10.5	8.5	13.5	12.5	24.1667	17
Anapc1	22.5	29.5	20.5	48	41	34	44.25
Anapc11	22.5	23	20	24.5	31	80.6667	39
Anapc16	27	26	20	19.5	23.5	60.6667	39.25
Anapc2	10	17.5	17	28.5	26	41.5	24.5
Anapc5	67	174	92	149	136.5	106.833	89.5
Angel2	13	31	14.5	22	23.5	16.1667	16
Angpt2	18.5	22.5	12.5	6.5	11.5	679	1332.5
Angptl4	11.5	56	5	5	6.5	300.5	386
Ankib1	12	18	17	19.5	19	24.8333	33.25
Ankrd13a	53.5	62.5	21.5	57.5	29	87.6667	96.75
Ankrd27	5	15	7.5	5.5	5.5	13.8333	10.75
Ankrd33b	1.5	4	3	15	5	4	3.5
Ankrd37	15.5	63.5	6.5	30.5	6.5	43.5	24.75
Ankrd40	19	15	9	21.5	12	41.5	38.75
Ankrd46	9.5	15.5	10.5	14.5	8.5	109	65
Ankrd49	3.5	11.5	7	9	16	8.66667	9.25
Ankrd50	14	5.5	17	21.5	21	25.6667	31
Anks1	34	19.5	34	45	14.5	7.66667	10.5
Anln	0	8.5	2.5	20	13	15	16.5
Ano10	13.5	11.5	5.5	11.5	12.5	34.3333	31.25
Ano6	24	35	10	37.5	54.5	53.6667	66.75
Ano8	1.5	3.5	3.5	11	6.5	3.33333	3.5
Anp32a	357	457.5	310.5	664.5	636	40.3333	114.5
Anp32b	84.5	99.5	76.5	137	150.5	47.1667	18.25
Anp32e	76.5	183	90.5	317.5	107	21.3333	14.25
Antxr2	2	4	5.5	111.5	8.5	10.3333	11.5
Anxa1	31.5	159	46.5	60.5	156	164	147.75
Anxa11	13	7.5	9	11	9	12	17
Anxa2	44.5	109	64	206	241.5	1403.33	940
Anxa3	257.5	313	36.5	179.5	80	737.333	669.5
Anxa4	30.5	31.5	11.5	32	21.5	41.5	45.75
Anxa5	162.5	158	113	113.5	146	495.333	484.25
Anxa6	28.5	137.5	16.5	95.5	81	152.167	108.75
Anxa7	34.5	28	18.5	15.5	21.5	148.833	132.75
Ap1b1	18	62	150.5	52	42.5	24.8333	18.25
Ap1s1	5.5	20	12	18.5	10.5	105	60.5
Ap1s2	41	47.5	12	29	21.5	42.1667	45.5
Ap2a1	76	68	20	39.5	27.5	46.1667	51.25
Ap2a2	25	52	34	41	24	73.1667	57
Ap2b1	60.5	116.5	32	55.5	65.5	50.8333	72.75
Ap2m1	82	255.5	208.5	163	212.5	374.833	228.5
Ap2s1	34.5	87	104.5	50.5	40.5	161.333	115.75
Ap3s2	26	8.5	4.5	11	14	7.5	7.75
Ap4b1	9.5	11	4	6	6.5	16.5	15.5
Apaf1	4.5	5	15.5	13	8.5	11.6667	15.5
Apba3	3	5.5	3	5	6.5	47	25.25
Apbb2	194.5	206.5	110	116.5	190	53.5	57.75
Apc	70.5	127	103.5	97.5	86	12	26.25
Apcdd1	415.5	842	0	17	1.5	24.6667	43.75
Apex2	8	8	3	7.5	8.5	3.5	3
Aph1a	20.5	79.5	26.5	69	64.5	53.5	54
Apln	9	165.5	2	9	12.5	1332	1399.75
Aplnr	13	83	4	61.5	64	0	0
Aplp2	606	534.5	169	398.5	264.5	218.333	213.25
Apmap	42	44.5	8.5	20.5	16	19.8333	20.25
Apobec3	10	12.5	14.5	16	12.5	14.6667	15.5
Apod	104	237	0	0	0	31.8333	22.75
Apoe	360	277.5	1132.5	6	76.5	344.333	184.25
Apold1	112	63.5	14	5	60.5	151.167	173.5
App	896	729	372	457.5	746.5	192.333	335.25
Appl2	29.5	51.5	111.5	35	20	5.5	6
Aqp1	0	0	194.5	139	22	1.16667	1.75
Aqp11	86	14.5	0.5	1.5	38.5	4.33333	2.25
Aqr	22	23.5	11	14	19.5	11.6667	12.25
Arap2	63	46.5	1.5	77	17	3.16667	4.75
Arap3	59	129	86.5	154.5	124.5	33.5	52.75
Arf1	29.5	47.5	28	57	37	369.5	234.75
Arf2	26.5	45.5	31	33	66	30.8333	24
Arf3	19	28	16	18	22.5	49.3333	35.5
Arf6	43.5	43	15.5	31	35.5	206.5	137
Arfgef2	3.5	10.5	5.5	3	3	7.66667	12.5
Arfip1	16.5	13	11.5	6.5	10	33	36.5
Arfrp1	28	16	14	12	9.5	21	13.75
Arhgap1	19	50	37.5	54	40.5	68.5	49.75
Arhgap12	15	37	26	16.5	13	11.3333	13
Arhgap18	41.5	213.5	42	128	173	8.5	10.25
Arhgap19	1	2.5	2.5	6.5	3.5	1.33333	1
Arhgap23	8.5	13	33	15.5	11.5	14.1667	16.5
Arhgap25	8	16	8	14	14.5	11.1667	15.25
Arhgap26	27.5	19	28.5	22	24	11.6667	14.5
Arhgap27	9.5	35	8	31	18	12.3333	13.5
Arhgap28	1.5	14	2.5	27	20	8.33333	6.25
Arhgap29	212.5	182.5	97	171.5	144.5	245.833	402.25
Arhgap31	52	31	35.5	41.5	31	28.1667	60.5
Arhgap32	5	17	16	11.5	10	4.5	4.75
Arhgap33	0	4	4.5	7	2	0	0
Arhgap35	8	11	8	9	9	11.6667	17.25
Arhgap5	24	38.5	8.5	19	25.5	30.6667	40
Arhgdia	96	85.5	52	112.5	74	392	269
Arhgef1	56	67.5	54.5	84.5	73.5	28.5	15.75
Arhgef10	10.5	11.5	9.5	16	12.5	6	8.25
Arhgef12	87	80.5	32	87	26	27.6667	57.25
Arhgef15	22.5	30	42	51.5	26.5	13.8333	18.25
Arhgef2	134.5	118	32	120	66	32.8333	38.5
Arhgef26	1.5	9.5	1.5	51.5	38	3.33333	2.5
Arhgef28	5.5	10.5	1	4.5	12.5	27.6667	33.75
Arhgef3	37	11.5	10.5	42	49.5	9	13.75
Arhgef5	14.5	30.5	12.5	10	19.5	10.3333	14.75
Arhgef7	54.5	82	94.5	102	73	15.8333	54
Arid1a	25	36.5	24	45.5	29.5	2.5	3.75
Arid2	11.5	16.5	9	18.5	10	4.66667	6.75
Arid5a	7.5	3	3.5	14	7	13.6667	10.75
Arid5b	10.5	6	5	12	8	12.8333	17.5
Arl1	69	97	39	63.5	66	94.3333	94.75
Arl13b	4	7.5	14.5	10	4.5	9.33333	10.25
Arl15	15.5	8	7.5	15.5	5	14	17.75
Arl2bp	137	160.5	11.5	85.5	63	95.3333	65.5
Arl4a	149	108.5	23.5	9.5	13	20.3333	15.25
Arl4d	13	2.5	7.5	12	6	13.5	10.75
Arl6ip5	104	95	28.5	37	53.5	103.5	131.25
Armcx1	20.5	33.5	68.5	72	36.5	7	6.75
Armcx2	10.5	29.5	9	25.5	27.5	22.6667	28.25
Armcx3	7	14	20.5	15.5	9.5	28.1667	26
Armcx4	3.5	14	35.5	90	13	0.5	1.75
Armcx6	2.5	5	19.5	14.5	15	1.83333	2
Armt1	1.5	10.5	2	4	1.5	4.5	4.25
Arpc1b	157	215	114.5	133	169.5	381.667	330.5
Arpc3	99.5	233	111.5	149.5	128	405.833	409
Arpc4	102	137.5	79.5	118.5	101.5	367.667	214.75
Arpin	7.5	5.5	4.5	10.5	8.5	7.83333	6
Arrb1	6.5	9.5	45	57.5	24.5	14.6667	33
Arrdc1	28	34.5	12.5	26	14	16.8333	14.25
Arrdc2	8	7	5	6.5	6	5.33333	4.75
Arsa	5	9.5	12.5	14	11.5	42.8333	49
Art3	28.5	28.5	47	1.5	11	1.5	1.5
As3mt	15	17	5.5	15.5	10.5	13.8333	12.5
Asah2	2	3.5	9.5	3.5	13	5.5	14.5
Asap2	3.5	7.5	7	19.5	13.5	5.33333	8.5
Asb4	6.5	8.5	6	0	0	11.8333	14.25
Asb6	3	4.5	7	8	8.5	19.5	13.75
Asb7	2	2.5	6	2	1.5	3.83333	4.75
Ascc2	3.5	7	4.5	6	4.5	10.1667	9.5
Ascc3	13	16	17	41.5	18	8.66667	12.5
Asf1b	0.5	8.5	3	11.5	3	6.16667	3
Asl	20.5	61	19	31.5	36	17	17.75
Asna1	41.5	57.5	19	27	40	50.5	45
Aspg	0	2.5	1	6.5	0.5	0	0
Aspscr1	91.5	178.5	57.5	62	10.5	28.3333	18.25
Ass1	8	3	2	13.5	5	9.5	11.5
Asxl1	14.5	24	17	35.5	37.5	6	9.5
Atad2	3.5	9	8	19	22	5.16667	7.75
Ate1	19	48.5	16	15	9	31	27.75
Atf6b	7.5	12	9.5	14	8.5	18.6667	13
Atf7	52.5	56.5	33	68.5	33.5	10.6667	8.5
Atf7ip	259.5	342	299.5	302.5	174	7.83333	8.25
Atg101	19.5	7	3.5	8.5	14.5	37.5	20.5
Atg2a	2	7.5	6	5.5	7.5	5.83333	5.25
Atg5	8.5	11	8.5	11	7.5	24.1667	19.75
Atg7	4	11.5	6.5	9.5	6	14	10.75
Atl2	11	48	6	10.5	8.5	13	11.5
Atl3	30	25	10	16	14	27.8333	51.25
Atn1	35.5	38.5	22	45	36	2.83333	2.25
Atoh8	1.5	0.5	2.5	3	6	18.3333	5.75
Atox1	55.5	54	21.5	21	16.5	570	443.25
Atp10a	38	3	0	1	0.5	9.83333	16.25
Atp11a	17.5	8.5	21	53.5	29.5	27	44.75
Atp11b	95	94	24.5	25.5	38.5	10.6667	12.5
Atp11c	16.5	14.5	7.5	8.5	8	7.66667	14.75
Atp13a2	25	11.5	2	23.5	6	13.5	10.75
Atp1a1	29.5	55.5	23.5	52	41.5	78.6667	134.75
Atp1b3	82.5	84	50.5	94.5	66	140	135.25
Atp2a3	4	1.5	0	10	1.5	1	1.25
Atp2c1	155.5	170.5	140	99.5	58	47.1667	50.75
Atp6v0a2	30.5	24	30.5	102.5	10	35.3333	26.5
Atp6v1a	10.5	27	12	31.5	15.5	95.6667	94.75
Atp7a	30.5	15.5	6.5	21	7	34.8333	44.5
Atp8a1	60	25	13.5	13	23	8	10.5
Atp8b1	1	0	2.5	19.5	8.5	8.16667	16
Atp8b2	20.5	50.5	26.5	43	79	12.6667	16.25
Atp9a	10	10.5	7.5	18	7	21.8333	26.5
Atp9b	32.5	52.5	42.5	33.5	16	25.5	31.75
Atraid	54	47.5	21.5	31.5	32	98.8333	59.25
Atrnl1	3.5	8	6	4.5	2.5	20.1667	37.5
Atrx	314.5	236	214.5	264.5	220.5	20.1667	39.5
Atxn1	12	5.5	7.5	1	9	4.83333	9
Atxn1l	8	18	7.5	7	6.5	7	14.5
Atxn2l	23	57.5	41	71	60	13.6667	10.5
Atxn3	6.5	13	3.5	9	13	10.6667	12.75
Atxn7	18.5	6.5	8	12.5	10	5.66667	7.25
Atxn7l1	10.5	19	17	17.5	14.5	9.16667	4.75
Atxn7l3	2.5	6	3.5	8.5	5	10.1667	12.25
Atxn7l3b	26.5	30.5	15.5	22	15	34.5	38
AU021092	48	102	4	3	21.5	129.5	102.75
AU022252	5.5	20	0.5	4.5	2.5	13.1667	9.25
Aurka	0	1.5	5	12.5	6.5	6.66667	4
Aurkb	0	5	7.5	17	14	5.33333	3.75
Auts2	61	69	64.5	79	9	2.16667	2.5
AW549877	14	14	15	11	7	12.3333	9.75
AW554918	5	7.5	4.5	13	8	4	3.75
Axin1	5	12	3	24.5	9	10.8333	8.25
Axin2	49.5	26.5	5.5	9.5	9.5	0	1.5
B230307C23Rik	3.5	52	101	4.5	10	16.5	10.5
B2m	586	346.5	593.5	562.5	850.5	1325.33	1430.25
B3gat3	6	12	10	9	13.5	20.5	14.75
B4galt1	10.5	9.5	11.5	13	12.5	37.1667	37
B4galt4	105.5	17.5	21.5	35.5	26	9.66667	7.75
B4galt5	38.5	81	33.5	73	23.5	16.3333	21.25
B4gat1	11	9.5	5.5	3	10.5	18.1667	17.25
B9d1	5	13.5	7.5	7.5	15.5	18	7.75
Babam1	75.5	195	110	147.5	100	73.8333	42.75
Bace2	1.5	9	175.5	31	3	13.3333	8.75
Bach1	7	11	15	13.5	9	4.83333	6.75
Bad	16	31	9	17.5	21.5	55.1667	36
Bag5	24	20.5	11.5	16.5	17.5	18	15.25
Bag6	56	98.5	39	152	82.5	33.1667	48.75
Bahcc1	4	3.5	3	6	8	0.166667	0.5
Bahd1	4	6	3.5	5	2	6.33333	8
Baiap2	16	29.5	9.5	18	9.5	6.5	7.25
Bak1	3	11	6.5	12.5	13	28.6667	51
Bambi	2	13	1	3.5	6	7.16667	4.25
Banp	7	14.5	6.5	14.5	9.5	9.33333	9
Batf2	2	1	5	22.5	40.5	0.833333	0.5
Bax	45	81.5	105.5	125	148.5	323.833	175
Baz1b	37.5	36.5	31.5	53.5	39.5	11	20.5
Baz2a	17.5	17	11.5	19	14	5.16667	6.5
Bbc3	1	2	3.5	10	11.5	10.6667	10.5
Bbs4	2.5	4	2	2.5	7.5	3.5	3.75
Bbs9	16	15	15	19.5	20	3.33333	3
Bbx	22	16	10.5	15.5	17	6.5	7.5
BC028528	58	109.5	23	134.5	40.5	44.3333	42
Bcam	105	15.5	13	36.5	38	117	115
Bcar1	8.5	15	16.5	15.5	15	95.5	57
Bcar3	50	16	4.5	20.5	5	8.33333	11.25
Bcas3	23	33.5	24.5	20.5	13.5	19.5	13.5
Bche	29	10	0.5	1	0	2.66667	2.5
Bckdk	18.5	25	8.5	23.5	13	58.3333	39.5
Bcl2	2	8.5	3	3	4	3.66667	6.25
Bcl2l1	53.5	23	17	32.5	25.5	151.333	139.5
Bcl2l11	7	15	9	20	18.5	10.8333	9.25
Bcl2l13	4	5.5	6	7.5	7.5	12.6667	11.5
Bcl3	15	5.5	5	6	5	2.5	1.25
Bcl6b	17.5	49.5	29.5	50.5	73	94.6667	143.5
Bcl7b	40	24	15	19	13.5	51.5	33.5
Bcl9l	10.5	10	6.5	23	9	1.83333	1.75
Bcorl1	2.5	11	8	12.5	4.5	1.16667	2.25
Bcr	11	17	9	9	6	26	48.25
Bdp1	15.5	13.5	11.5	22	26.5	3.66667	8.75
Bend5	6	19	1.5	9.5	4.5	2.33333	2
Bet1l	27.5	36.5	26	13.5	24	18.3333	13.5
Bgn	36	276.5	109.5	135	93.5	25	23.75
Bhlhe40	77	25	27	19.5	45	32.6667	42
Bicd2	13	16	11	24.5	10.5	14	21
Bicra	4	3	6.5	4	9	0.5	0.25
Bik	0	0	8.5	11.5	9.5	5	3.75
Bin3	22	31.5	12.5	11	15.5	20	18
Birc3	23.5	22	23.5	8	7	18.5	22.5
Birc5	0	14	8	39.5	25	15.3333	8.75
Birc6	57.5	79	41	82.5	55.5	16.5	38.75
Bivm	8.5	21	3.5	9.5	6	7.16667	6.25
Bloc1s1	18.5	44	28.5	18	89.5	98.1667	84.75
Bloc1s2	4	6.5	5.5	6	8.5	40.8333	29.25
Bloc1s5	4.5	3	2	6.5	6	5.33333	4.5
Bloc1s6	17.5	17	14	18	11.5	29.1667	16
Blvra	37.5	35	9	23	19.5	27	23
Blvrb	11.5	22.5	10	7	12.5	39.1667	29.25
Bmf	6	26	3	32	28	0.5	0.5
Bmi1	80.5	73.5	33.5	73.5	85.5	35	30.75
Bmp2	0	1	34.5	0.5	3	47.8333	21.75
Bmp2k	7.5	15.5	11	11.5	5.5	10.1667	14.25
Bmp6	0.5	2	3	82	0	36.6667	35
Bmpr2	238	123	57	209	36	20.6667	36.75
Bmx	9	2.5	2	4.5	3	3.5	6.5
Bnip2	96.5	89.5	73	79.5	67	131.667	124.5
Bnip3	14.5	4	10	1.5	3	97.3333	66.25
Bnip3l	415.5	411.5	132.5	175	176	132.333	94
Bod1	7.5	17.5	9	14.5	13	47.6667	31.5
Bok	10.5	32.5	11.5	4.5	15.5	16.6667	7.25
Bop1	30.5	15	6	14.5	8	24.8333	13.25
Borcs5	0.5	1	0.5	2.5	7	6.66667	4.75
Braf	17	10	6	8.5	10.5	7	9.25
Brca1	0	7.5	3	10.5	10.5	0.833333	1.5
Brd4	40.5	71.5	48.5	84	63.5	16.8333	4.25
Brd7	59	120	29	45.5	42	10.5	14
Brf2	6	4.5	1.5	3.5	11	8.66667	6.25
Brk1	105	132.5	44	88.5	69.5	163.5	135.5
Brms1	31	43	28.5	29	33	22.5	17.5
Brpf3	7	15	8	17	20	2	1.25
Brwd1	71	83.5	63.5	75	132.5	23.3333	28.5
Bsg	2669	1847	44	62.5	54	669.667	479.25
Bst2	34	29.5	79	66	202	130.833	106.75
Btbd3	7	9.5	3	17	8.5	10.5	11.75
Btbd7	28	19	13	22.5	19.5	13.5	20.75
Btbd9	8	34	23	37	23.5	14.3333	13.5
Btd	5.5	6	2.5	4	3.5	12.6667	12.5
Btg1	4	16	9.5	22.5	70.5	34.6667	34
Btg2	47.5	14	13	28	39	74	107.5
Btg3	28.5	15	4.5	19.5	2.5	59	48.25
Btnl9	0.5	0.5	24	2.5	28	0	0
Bub1	0	6.5	2.5	10	9.5	2.66667	2.75
Bub1b	0	26.5	11.5	35.5	11.5	2.66667	2.25
Bub3	26.5	23.5	20.5	35	15.5	70.1667	47.5
C130074G19Rik	154.5	146	11	67.5	42	26	94.25
C1qtnf1	8	3	205.5	12.5	3	2	3
C1qtnf6	1.5	14.5	35.5	5	11	7	7.25
C2cd2	12.5	29.5	16.5	23.5	19.5	25	23
C2cd2l	13	16	13.5	7.5	14	9.5	9.75
C2cd3	10	12.5	7.5	14.5	14	1.33333	2
Caap1	8.5	9	3	6.5	5	7.66667	7.75
Cables2	23	11	4.5	16.5	19	12.6667	9.25
Cacfd1	11.5	18	4.5	12	10.5	6.83333	3.5
Cachd1	21.5	21	3.5	10.5	17	6.33333	7.25
Cacna1a	2	15	28.5	0.5	4	1	2.5
Cacng3	0	0	10	0	0	0	0
Cactin	12.5	12.5	9	18.5	24.5	10.5	9.25
Cacul1	14.5	22	11	19	27.5	29	38
Cadps2	1	3	2.5	19	3.5	2.33333	2.25
Calcrl	51	23	118.5	536	101.5	41.6667	37.5
Cald1	151.5	30.5	166	332.5	406	240.833	215.25
Calm2	276	492	685.5	405	363.5	569.833	399.5
Calml4	1.5	1	25.5	7.5	61	0	0
Calu	123.5	276	152.5	222	177.5	365.167	405.25
Camk1	14	12	34	18.5	25.5	80.6667	53.5
Camk2d	25.5	58	18	38	113	62.5	49
Camk2g	19	32	21	22.5	18.5	9.5	15.5
Camk4	0.5	3.5	0.5	12	2.5	0	0
Camkk2	3	10	7	11	18	8	6.25
Caml	27	51	18	35.5	29.5	29.1667	27
Camta2	8.5	11.5	7.5	5.5	6.5	7.5	4.25
Cant1	4	9	7	7.5	4.5	20	17.5
Cap1	107	189.5	62	120	133	157	213.5
Capg	20	36	8.5	3	22.5	256.833	192
Capn15	11	6.5	1.5	3.5	2.5	2.83333	2.25
Capn2	66.5	51.5	40	65.5	56.5	123.833	105
Capn5	0.5	0.5	3	8	2.5	2.66667	2.75
Capns1	184	192	77	106	120	272.167	326.25
Capzb	198.5	268	128	175.5	239	337	199.25
Car14	11.5	9	0	13	0	0.166667	0
Car2	48	51	12.5	36.5	26	7.16667	5.75
Car4	1175.5	633	0	46.5	1	0.333333	0
Card10	7.5	8	5	10.5	9	10.6667	7.25
Card19	15.5	9	3	12	9	119.167	77.5
Card6	2.5	7	3	4	3.5	0.666667	0.5
Carhsp1	6	11.5	11	25.5	27	51.3333	36
Carm1	34	11	10.5	12.5	8	19.8333	11.75
Carmil1	2	4	26.5	60.5	14.5	1.16667	1.25
Cars2	2.5	6	8.5	5	5	9	5.5
Casc3	8	10.5	9.5	17.5	16.5	10.6667	8.75
Casd1	16	14.5	11.5	21	17	16.8333	17.5
Caskin2	22	27	16	56	46	11.8333	13.5
Casp12	11.5	5.5	4	7.5	10.5	16.8333	19.75
Casp2	13.5	14	9	13.5	18	7.83333	5.75
Casp4	4.5	6	44.5	7.5	12	11.6667	8.5
Casp6	12.5	69.5	13.5	14	10.5	12.3333	9.75
Casp7	21	33	23.5	35.5	39	21	29.75
Casp8	37.5	55.5	42	70	33.5	48	45.75
Casp8ap2	21	35.5	21	19.5	22	3.66667	5
Casp9	6	4	1.5	3	9.5	8.33333	7
Cast	87	144	39.5	65	108	36.5	53.75
Casz1	20.5	1.5	3	58	6.5	0	0.5
Cat	31	78.5	12	27.5	22.5	37.8333	29.75
Cav1	170.5	123	9	581.5	59.5	2554.83	2154.25
Cav2	94.5	33.5	18	60.5	24.5	546.333	425.75
Cavin1	146	68.5	29	177.5	49	393.833	441.25
Cavin2	42	22.5	72.5	208.5	20.5	56.8333	59.25
Cavin3	22	10.5	1	11.5	51	254.5	123.75
Cbfa2t3	15	8	22.5	25	16	2.33333	1.25
Cbfb	15.5	29	24.5	37	32	39	43.75
Cbl	44	50.5	22	40	33	8.66667	8.5
Cbwd1	10	11	4.5	15	5.5	12.5	13.75
Cc2d1a	2	16.5	3	15.5	11.5	6.5	6
Ccar2	4	7	5	12	6.5	10.6667	9.75
Ccdc102a	6	7.5	1	5.5	6	9.83333	7.5
Ccdc117	16.5	6	4	6.5	4.5	9.33333	8.25
Ccdc125	3.5	15	3.5	11.5	9.5	1.83333	3
Ccdc126	3	7	4.5	2	3.5	12.1667	10.5
Ccdc137	32	9.5	5	14	6.5	8.83333	6
Ccdc141	269	262	0.5	3.5	3.5	10	17.25
Ccdc15	1	2.5	2.5	2.5	11.5	1	1
Ccdc163	0.5	6.5	9	11	8.5	5.33333	4.5
Ccdc186	50	29	23.5	30.5	31	5.5	10.5
Ccdc194	0	1.5	5.5	0.5	1	0.666667	0.5
Ccdc28b	15.5	52	9	55.5	27.5	11.5	5.5
Ccdc3	4	1.5	0.5	0.5	50	0.333333	0
Ccdc61	5	4	5	10	4	6.83333	3.75
Ccdc8	2	11.5	9	3	1.5	0.5	1
Ccdc85a	14.5	18.5	0	25	4	8	5.5
Ccdc85b	9.5	10	2.5	5.5	4	15.6667	12.5
Ccdc85c	3.5	7.5	0	5.5	2	3.66667	7
Ccdc88c	28.5	8.5	14	4.5	16	1.16667	2.25
Ccdc9	193	160	89	122.5	185.5	11.8333	20
Ccdc90b	20.5	17	6	7.5	8.5	18.5	13.5
Ccdc93	3	8	10	4	5	4.16667	6
Ccdc9b	1	1.5	5.5	3	1	6	8.5
Ccl19	2	7.5	0.5	0	0	0.166667	0
Ccl21a	138.5	127	0	3	0.5	0	0
Ccm2l	30.5	20.5	10	23	14.5	17.5	23
Ccn1	47	43	28	89	102	1265	984.25
Ccn2	22.5	12	6	16.5	12	2705.67	2123.75
Ccna2	0	11	6.5	28	18	13.3333	11.25
Ccnb2	0	6.5	2.5	18	19.5	8.33333	6.75
Ccnd1	19.5	89	26	80	56.5	234	605
Ccnd3	44.5	84	27.5	35	26	108.333	65.75
Ccne2	0	3	8	7.5	1	6	4.25
Ccnf	0.5	6.5	4.5	14	16	3	2
Ccnjl	1	14	4.5	14.5	3.5	0.333333	0
Ccnl2	20	42	32	48	31.5	14	11.75
Ccnt1	16.5	25	18.5	20	41	17.8333	13
Ccny	34.5	33	17.5	22.5	21.5	96.3333	121.5
Ccnyl1	5	8.5	11	9.5	13.5	60.8333	55.75
Ccser2	34	42	18.5	31.5	32	30.6667	38
Ccz1	18.5	17	8	15	17.5	56.1667	53
Cd109	0	3.5	1	6.5	14.5	12.8333	13.5
Cd151	135.5	172	50	97	101	192.667	268.5
Cd1d1	0	9.5	4.5	22	17	1	1
Cd200	197	145.5	4	221.5	283	346.333	210.75
Cd2ap	93.5	57	23	44.5	29	21	43.5
Cd2bp2	14	41	11	27	26.5	30.1667	31.5
Cd300lg	5.5	1	55.5	2.5	7.5	0.166667	0
Cd320	20	35.5	0.5	4	2.5	22	17.5
Cd34	363	405	22.5	311.5	312.5	315.167	423.75
Cd36	0	1	482	592	15	0	0
Cd38	3.5	5	45.5	18	34	23.6667	13.25
Cd40	7.5	40	3	15	14	4.66667	5
Cd55	1.5	13.5	152	5	9.5	5.5	4
Cd59a	128	36	81	7.5	25.5	24.3333	20.5
Cd59b	6	4	5.5	2.5	1	1	0.25
Cd81	183	161.5	126.5	81.5	216	701.5	603
Cd82	48	161	16	9	9.5	69.1667	78.25
Cd93	73.5	196	34.5	226	140	376.833	548.5
Cd99l2	6.5	15.5	7.5	11.5	4	15.8333	17.75
Cdan1	3.5	13.5	4	14	16	3	3.25
Cdc14a	5	10.5	20	3	26	1.83333	3.5
Cdc20	0.5	3.5	7	24	20.5	15.5	7.75
Cdc34	8.5	29.5	12.5	14.5	26.5	121.667	80
Cdc37	35.5	84	41	62	67.5	62.8333	58.25
Cdc42bpa	21	41	16.5	52.5	25	22.3333	41
Cdc42bpb	20	74	36	75	80	20.1667	41.5
Cdc42ep1	8.5	6.5	8	31.5	15.5	60.1667	28.25
Cdc42ep2	3	2	3.5	2	6	6.16667	7.5
Cdc42ep3	15.5	23.5	7.5	3	15.5	124.167	122
Cdc42ep4	28	26.5	7.5	17	10.5	40.5	34
Cdc42se1	17	26.5	4.5	16	21	49.5	43.25
Cdc45	0	3.5	4.5	10	12.5	3.5	2.75
Cdc7	1	6.5	1	7.5	4	1.83333	2
Cdca2	0	3.5	5	9	9.5	2.16667	2
Cdca4	5	11	10.5	21.5	13	26.5	19
Cdca5	0	2	2	4.5	5.5	1.5	1.5
Cdca7	6	10	3.5	10.5	10	3.16667	2.25
Cdca8	0	14.5	5.5	36.5	36	5.5	3.5
Cdh11	1.5	16	0	8	1.5	4.33333	4.75
Cdh13	2	7	3.5	3	17	48.5	90
Cdh5	144.5	142.5	107.5	357	172.5	225.167	520.25
Cdipt	24.5	37	29.5	24.5	24	183.167	138.75
Cdk1	0.5	46.5	12.5	55	29	25.6667	21.5
Cdk17	39	74	34.5	43.5	19.5	73.6667	70.75
Cdk19	23.5	7.5	2.5	17.5	10	7	12
Cdk2	12.5	15	5	16.5	13.5	15	11
Cdk2ap1	56	81.5	26.5	94	75	111.5	85.25
Cdk4	44	145	119	198	158	164.333	142.25
Cdkn1a	46.5	25.5	9.5	14.5	15.5	559.333	142
Cdkn1c	164	70	44.5	45.5	88	5.16667	1.75
Cdkn2aipnl	10	13.5	4	11.5	11.5	74	53.75
Cdkn2b	18	17.5	0.5	1	0	25.8333	27.75
Cdon	67	3.5	0	1	2.5	0.5	1
Cdr2l	1.5	3.5	5.5	10.5	6	29.8333	21
Cds2	48	43.5	24	26	31	62.5	65.25
Cdyl	5.5	8.5	7.5	9.5	18	6	5
Ceacam1	64	21.5	9.5	26.5	21.5	3.5	5
Cebpd	3.5	1.5	7	6.5	4.5	40.1667	44.5
Cebpg	26	15	16	17.5	14.5	44.1667	40
Celsr2	0.5	3.5	1	12.5	4.5	0	0
Cemip2	3	10.5	90	109.5	10.5	11.3333	20
Cenpa	2.5	17.5	28.5	46.5	33	11.3333	6
Cenpb	26	31.5	16.5	32.5	27	56.3333	77
Cenpf	0	15	6.5	26	13.5	0.5	1.5
Cenpi	0	2.5	3.5	6.5	3	2	2.25
Cenpj	2.5	6	4	15.5	15	1.16667	3
Cenpm	0	19	21	41.5	15	5	2.25
Cenpn	0.5	5.5	0	10	3.5	2	1.5
Cenpo	3	4.5	0.5	8	2.5	3.5	3.5
Cenpt	1.5	11.5	7	15.5	5.5	13.8333	11.25
Cep112	6	9.5	11	14.5	25	0.833333	0.5
Cep131	5.5	14.5	12	20.5	11	1.33333	1.5
Cep170	10	19.5	14.5	32.5	10.5	14	21.25
Cep250	21	18.5	32	36.5	22	3.66667	13
Cep55	0	11	5	25	10	2.83333	3.25
Cep57	14.5	20	11	24	16.5	7.16667	7.25
Cep68	12.5	22	9	13	12.5	11.1667	11.25
Cep85	3.5	8.5	13	18.5	15	12.5	5.5
Cep85l	23.5	8	2.5	40.5	22	2.33333	2.5
Cerk	1.5	10	5.5	6	4	35	31.5
Cers4	22.5	23	8	29.5	18	42.6667	42.75
Cers5	31.5	38.5	15	34	27.5	98	76
Ces2e	1.5	1	1.5	2.5	12	0.666667	0.5
Cfap97	7	7.5	1.5	6.5	7.5	6.33333	8
Cfdp1	49.5	104	76.5	93.5	95	54.3333	55.25
Cfh	60.5	5.5	8	1	1	43.8333	51.75
Cflar	57	23.5	41.5	44	57	75.8333	88.5
Cggbp1	37.5	36.5	23	40.5	24	69.1667	59.75
Cgnl1	83	91.5	9	34.5	26.5	33	105
Cgrrf1	11.5	11.5	11.5	12.5	12.5	39.3333	22.5
Chaf1a	1	13	10.5	33	14	2.16667	2
Chaf1b	0	5	3.5	16	7.5	5.66667	3
Chd1	43	66	47.5	62	66	10.6667	15
Chd3	37.5	105	17	60.5	98	6	13.75
Chd7	15	36.5	25.5	35	32.5	6.16667	9.5
Chek1	1.5	4.5	6.5	16.5	21.5	1.33333	1.75
Cherp	20.5	39.5	19.5	50.5	50	11.1667	4.5
Chic2	15	32	11.5	20	16.5	98.3333	67
Chmp2b	51	24	19.5	14.5	38	52.3333	51.75
Chmp3	245	165	78	138	114	72.3333	73.25
Chmp5	108	54.5	37.5	41	50	78.3333	68.75
Chmp6	68	41	15.5	30.5	48.5	46.5	29
Chmp7	18.5	26.5	10.5	22	14	38.3333	24.75
Chn2	36.5	34	5	10.5	25.5	6.33333	4.75
Chpf2	6	8	5.5	6	4.5	35.8333	35.75
Chrac1	7.5	7.5	10	10.5	10.5	37.1667	21.75
Chrm3	0	0.5	0	1	9.5	0.166667	0
Chrnb1	4	5.5	1	1.5	2	41.8333	31
Chst1	1.5	26	1	1	4.5	43.1667	23
Chst11	8.5	10.5	0	5.5	3	4.33333	11.5
Chst14	6.5	5.5	7.5	10.5	4	21.6667	16.5
Chst15	3.5	7	29	7	7	6.33333	4.5
Chst2	2	9.5	3.5	1.5	7.5	12	7.25
Chtf8	33	46	22.5	43	42	35.8333	45
Ciao2b	11	14	4.5	16	14	78.5	39.75
Ciapin1	6.5	26.5	15	22.5	32.5	48.3333	24
Ciart	3.5	11	2.5	33.5	18.5	4.33333	2.5
Cib1	7.5	9.5	6	6.5	8.5	80.8333	54.75
Cic	15	39	52.5	46.5	35	3.66667	8.5
Cinp	9.5	14	4	8	14	27.3333	21
Cip2a	11.5	7	8	22.5	5	2.5	4
Cirbp	33.5	43.5	24	35	99.5	26.8333	21.5
Cit	1.5	17	20.5	40.5	18	1.5	1.25
Ciz1	28.5	51	40	68	48.5	9.66667	10
Ckap2l	0	6	7	14.5	10.5	1	1.25
Cklf	9	28	13.5	22.5	26	24	16
Cks1b	0	8	4.5	16.5	18.5	43.1667	17.25
Clasp2	24	28.5	18	19.5	18	18	26
Cldn15	0.5	0	0.5	1	35.5	0	0
Cldn5	733.5	562.5	36.5	179	65	453.5	469.25
Cldnd1	19.5	41.5	21	21	23	24	17
Clec14a	17	12.5	28	66	17.5	209.667	146.25
Clec1a	5.5	20.5	10.5	136.5	30	12.5	15
Clec1b	2.5	0.5	29.5	0.5	0	0.666667	0
Clec2d	111.5	26.5	39	59	53	9.33333	20
Clec4g	0	0	470.5	0	0	0	0
Clic1	42	80	66.5	75.5	89	324	257
Clic4	80	53	23.5	51	52.5	404.333	412.5
Clic5	31	6.5	0	26	13.5	3.33333	5
Clint1	20.5	23	7	14.5	11	29.5	26.25
Clip1	77.5	79.5	43	31.5	42	13.1667	19.25
Cln5	11.5	18.5	9	9.5	25	39.5	33.5
Cln6	2	3.5	9.5	8.5	6.5	8	8.75
Clock	24.5	12.5	11.5	12	6	13.1667	21
Clpb	15	31.5	5.5	19	27.5	22.5	16.5
Clptm1	40.5	53.5	52	48.5	36.5	102.5	91.25
Clspn	0	22	19	53	14	0.833333	1
Clta	70.5	100.5	150.5	77	78	185.167	186
Cmc1	5	12	6	5.5	5.5	24.5	19.75
Cmc4	1.5	5	1.5	3	8	5.5	4.5
Cmklr1	2.5	22	6.5	5	32.5	0.666667	2.25
Cmtm3	5	27	47	50	41.5	41.5	26.5
Cmtm6	47	63	51	43.5	43	87.3333	56.75
Cmtm8	18.5	20	15.5	10	15.5	11.8333	17.25
Cnep1r1	17.5	19.5	15	21.5	20.5	28	29
Cnksr3	2.5	7	16.5	6	6	16.8333	21.5
Cnn2	59	68.5	31.5	59	60	261.333	200.25
Cnn3	313.5	306	170	329.5	439.5	257.833	188
Cnot1	51	83	38	78	71.5	16.5	25.25
Cnot11	10	20	7.5	13.5	9.5	18.1667	16
Cnot6	46	47.5	30.5	62	61.5	26.8333	23.25
Cnot6l	200.5	162.5	56	120.5	138.5	12.5	15.25
Cnot8	17.5	40.5	46.5	53	86.5	31.1667	22.25
Cnp	38.5	15.5	11.5	9.5	8	16.8333	15
Cnppd1	13.5	23.5	13.5	17.5	31	51.5	42
Cnpy2	19	59	31	29	37	75.3333	47.5
Cnpy3	8	19	7.5	17	8.5	29	22.25
Cnr2	0	0	6	0.5	2	0	0
Cnrip1	1	1.5	22.5	4.5	13.5	4	3
Cntln	8	7	7.5	13.5	9.5	1.16667	3.25
Cntrl	9	21.5	18	38	31.5	1.66667	3
Cntrob	2	3	0.5	11	5.5	1	1.5
Coasy	3	9.5	7	9	9.5	12.5	9
Cobll1	131	92.5	1	12	28	12	12.75
Cog4	9	25	18	20.5	14.5	21.3333	22.5
Cog5	15	28	3.5	16.5	8.5	11.6667	18.5
Cog8	9.5	7.5	9	14.5	13	20.5	15.5
Col13a1	0.5	3.5	57	6	11.5	0.166667	0.25
Col15a1	0.5	28.5	1.5	116.5	285	2.5	3.5
Col17a1	0	0	8	0	0	0	0
Col18a1	8	63.5	5.5	67	59	136.333	268
Col4a1	759	2041.5	634	3965.5	1983	627.5	1251.25
Col4a2	462	898	187	1222.5	572	309.833	603
Col4a3bp	111.5	17.5	19	15.5	14.5	20.8333	35.5
Colgalt1	23.5	39.5	19.5	20	23	121	120.75
Colgalt2	11	10.5	5	2	3	0.5	1.75
Commd10	4	8	7.5	5.5	10.5	33	20.5
Commd7	11	22.5	14	11.5	18.5	35.3333	20.75
Commd9	6	6.5	1.5	4	19	28.6667	18.75
Copa	33.5	50.5	29	49.5	53	103.167	87
Cops2	70.5	57	20.5	41	69.5	40.1667	52.75
Cops7a	35	40.5	28.5	31	34	76.6667	53.5
Cops7b	2	18.5	5.5	5	3	8	4.75
Cops8	37.5	39.5	17.5	45	23	55.1667	51.25
Copz1	31	39	30.5	34.5	35	84.1667	50.5
Copz2	52.5	7	9	10	7.5	36.8333	21.25
Coq10a	6.5	12	8.5	12	1.5	10.1667	8.25
Coq2	6	10	11.5	13.5	11.5	29.8333	19
Coq4	3	3	3	27	4.5	14	8
Coro1b	149.5	217.5	91	153	145	220	160.5
Coro1c	120	265	185.5	347.5	72.5	121.833	80.5
Coro2b	15.5	45	30.5	43.5	21.5	1.33333	2.5
Coro7	5	16	13.5	8.5	14.5	8.33333	7.5
Cox10	23.5	9	5.5	3.5	8	8.83333	5.5
Cox14	10	17.5	9.5	9	9.5	71	36.75
Cox16	53.5	16.5	8	17.5	15	54.3333	41
Cox18	1	5	1	9	8.5	49.3333	33.75
Cox7a2l	103	168.5	93.5	110.5	128.5	126.833	153.5
Cpd	148.5	101	49	81.5	95	47.8333	80.75
Cpe	223	647	6	31	25.5	264	188.75
Cplane1	11	7	5.5	10	17	1.33333	2.25
Cpne1	14.5	22	24.5	42.5	22	42.5	37.5
Cpne2	7	8	31	6	6	23.8333	20.5
Cpne8	13.5	12.5	9	28	15.5	32.5	28.25
Cpped1	7.5	8.5	10	6.5	7.5	17.1667	14.75
Cpsf2	4.5	9	3	7	6.5	14.1667	15.75
Cpt1a	28	44.5	9.5	25	28	28.3333	37.5
Cpt1b	0.5	2	8.5	0	3	0.166667	0.25
Cpt2	22.5	17	2.5	9	10.5	14.3333	11
Cptp	4.5	10	3	7	6	18.1667	13.25
Cr1l	78	87.5	22	42.5	32.5	159	167.5
Cracr2b	26	41	54.5	85	39.5	83.6667	82.5
Cramp1l	8.5	10.5	10	6.5	4.5	2.5	4.25
Crcp	14	39.5	15	33	28	23.3333	19
Creb3l1	0	4	9.5	4	3.5	3.16667	0.75
Creb3l2	11.5	18.5	9.5	13.5	6	18.3333	21.25
Crebbp	68	120.5	59.5	118.5	160.5	5.5	8.5
Crebrf	32.5	17	21.5	9	14	11	10
Creg1	28	37	6	15	13	41.6667	29.75
Crem	21	33	13.5	20.5	17.5	36.3333	38.5
Crim1	77	16.5	56	51	40.5	409.667	558.5
Crip1	40	3	9.5	81.5	35	109.5	86.5
Crip2	76.5	80.5	27	99.5	57.5	416.833	216.5
Crispld1	13	3.5	0.5	5.5	4	3	3
Crk	25	51.5	34	36.5	39.5	112.167	101
Crkl	6.5	12.5	3.5	10.5	10.5	16.1667	17.75
Crlf2	4	13	18	11	12	63.3333	66.75
Crls1	23.5	6.5	3.5	6.5	9	29.5	20.5
Crmp1	0	24.5	0	4	7	4.5	3.5
Crtap	65.5	46	33	26.5	23.5	71	61.25
Crtc1	5	16	6	9	3.5	1.16667	1.5
Crtc2	17.5	20.5	39.5	28.5	32	8	4.25
Crybg3	33	36	13.5	29	30	9.33333	15.5
Csad	8	23.5	20	49	31	20.1667	17.25
Csf1	9.5	32	12.5	27.5	15	71.3333	105
Csf2rb2	1.5	0	7.5	0	1.5	0.333333	1
Csgalnact1	21	16	22	24.5	27	17.5	20.75
Csnk1e	33	119.5	76	151	83	49.5	44.5
Csnk1g1	9.5	24	13	17	20.5	12.5	16.25
Csnk1g2	106	156.5	172	144.5	211	67.6667	50
Csrnp1	2.5	1	4	12.5	9.5	34.3333	23
Csrp1	55.5	107	42	196	86.5	815	443.25
Csrp2	635	632.5	363.5	299	131	69.5	64.25
Cstf1	1.5	10	4	6	6	14.6667	10.25
Cstf2	16	36	10	31.5	21	22	26.5
Ctbp2	40	55.5	31	45	45.5	39.8333	34.5
Ctbs	4	12.5	5	7	5	17.5	22.25
Ctc1	10	25.5	14.5	27	14.5	9.16667	8
Ctcf	82.5	79.5	32	82	62	11.6667	15.25
Ctdnep1	28.5	70.5	35.5	75	64.5	32.3333	29
Ctdsp1	21.5	15	8.5	14.5	18	12.5	22.5
Ctdsp2	20.5	19.5	20.5	37	29	30.5	34.75
Ctdspl	12	6.5	17.5	5.5	3	8.5	5
Cthrc1	27	40	1	11.5	4	9.33333	4.75
Ctif	2.5	3.5	1	3	7	3.66667	7.75
Ctla2a	393	367.5	68	246.5	157	3789.83	3025.25
Ctla2b	8	30	14.5	8	7.5	276.5	246.5
Ctnna1	156	268	159.5	379.5	282.5	165	328.25
Ctnnal1	3.5	2.5	30	6.5	1	0.666667	0.5
Ctnnb1	916.5	1090	314	707	635.5	434.333	544.5
Ctnnbip1	23.5	62	3.5	13	24.5	42.5	31.75
Ctnnd1	133.5	165.5	103.5	241	131.5	79.1667	118
Ctns	4.5	5.5	6.5	10.5	4	9.83333	9
Ctsd	19	12	39.5	22	26.5	410.5	451.75
Ctsh	123	196	4	15	33	101.167	110
Ctsl	194.5	403	653	73	112	477.667	541.25
Ctso	9.5	10	11	4.5	8	20.8333	18
Ctsw	1	23.5	1	3	0	0.166667	0
Cttn	133	233	125.5	225.5	162	96.1667	88.75
Cttnbp2	11	27.5	2.5	14	22.5	1.5	1.25
Cttnbp2nl	22	68	35.5	56	46	57.5	79.25
Ctu2	13	37.5	37.5	26	10	14	8.25
Cul7	5.5	30.5	17.5	23.5	27.5	7	10
Cutal	17.5	2.5	0	0	0	3	2
Cutc	4.5	17	1	3	5	5.16667	4.5
Cux2	2	1.5	9.5	1.5	0	0	0
Cwf19l1	3	7	3.5	5.5	12	6.33333	6
Cxcl1	37	34.5	109.5	15.5	184.5	38	57.25
Cxcl10	1	0.5	104	2	28.5	0.666667	0.25
Cxcl12	510	102.5	2.5	57	30.5	246	287
Cxcl16	3	0.5	18.5	4	1	29.8333	36.5
Cxcl9	0	0	8	0	2.5	0	0
Cxcr4	6	36	1	34	6	35	152.25
Cxxc1	17	71.5	37	55.5	45	17	11.25
Cyb561	6	5	1	16	1	86.6667	45.5
Cyb561a3	3.5	6.5	4	3.5	4	18.3333	12
Cyb5b	19.5	23.5	8.5	13	34	81.6667	60
Cyb5r1	9.5	14	4	4	0.5	41.8333	36.75
Cyb5r3	119	111.5	94	142	107.5	237	116.75
Cyba	54	59	23.5	41	50.5	332.5	138.5
Cybc1	8	10	9	15	10.5	13.6667	10
Cyfip1	138	144.5	79.5	125.5	121.5	58.6667	58
Cyhr1	15	17.5	7.5	11.5	10.5	38.8333	25
Cyp20a1	11.5	20.5	18	16.5	28.5	37.5	30.25
Cyp26b1	0.5	1.5	19.5	12	16.5	1.66667	1.25
Cyp2d22	46	51.5	18.5	11	10	6.33333	3.75
Cyp4b1	0.5	0	48	19.5	6	55.8333	28
Cyp4f16	1.5	8.5	6.5	5	11	12.3333	9.75
Cyren	1	1	5	5.5	2	2.16667	1.75
Cyth1	9.5	33.5	13.5	31.5	23	16	16.25
Cyyr1	63.5	34	16	72	17	6.16667	10.25
D16Ertd472e	8	5	5	26.5	14.5	3.83333	2.75
D17H6S53E	17	9	9.5	7.5	3.5	10.8333	20
Dab2	60	88.5	169	9	40.5	30	24.5
Dab2ip	22.5	17.5	10	16	20	25.3333	37
Dach1	7.5	31	0	19	2.5	2.66667	5.75
Dag1	24	30.5	10	20	20	39.3333	31.25
Dagla	2	7	2	1.5	0	1.16667	1.75
Dap	25.5	44.5	10.5	36.5	24	31.3333	25
Dapk2	1	3.5	17.5	0.5	8.5	46.1667	26.25
Daxx	8	23	12.5	23	34.5	11.1667	9
Dbf4	3	8	5.5	13.5	15.5	7	8.25
Dbn1	1	45.5	41.5	120.5	72	62.8333	81.75
Dbnl	18.5	30.5	22	35	30.5	32.8333	26.5
Dbp	46.5	7.5	11	6	5	7.16667	5.75
Dcaf1	97	10	5	11.5	8	10.8333	11
Dcaf15	4.5	8	3.5	11.5	6.5	6.83333	7.75
Dcaf17	3	8	4	5	2	8	6.5
Dcaf5	6.5	10	11.5	8	19	11.3333	12.75
Dcaf6	17.5	34	13	17.5	11	11.8333	18.5
Dcaf7	14.5	14.5	6.5	23	12	35.6667	29.75
Dcbld1	4	21.5	8.5	9	2.5	6.33333	3.75
Dchs1	3	8.5	7.5	15.5	8	3.33333	10
Dck	2	10	2	6	5.5	8.16667	7
Dclk2	6.5	10.5	6.5	5.5	5	1.66667	2.5
Dcp1b	1.5	5.5	4.5	2	7.5	3.5	3
Dcps	4.5	5	3.5	8	7.5	15.1667	12.75
Dctn1	34	71.5	43	71.5	55	58.1667	67.25
Dctn2	20.5	31	16	33	38.5	70.3333	68.75
Dctn5	31	29	22	24.5	27	41.8333	30
Dcun1d4	5	8	9	5	6	5.16667	4
Ddah1	19	73	4	57	7	120.667	110
Ddah2	19	84	107.5	293	122.5	41.6667	24.5
Ddb1	157	190	113.5	205	141	205.167	220.25
Ddc	184	68	12.5	1.5	6.5	0	0
Ddi2	6	22.5	5	14	5.5	16.6667	21.75
Ddias	0	2	2.5	5	9	4.33333	5
Ddit4	43.5	19	24.5	29	64.5	8.5	13
Ddx19a	21	28	11	24.5	39.5	13	15.5
Ddx27	15.5	27.5	32	45.5	19.5	14	11
Ddx31	4	10.5	12.5	6.5	3.5	4.33333	3.75
Ddx39	10.5	33	15	32	33.5	60.5	29.5
Ddx41	5.5	12	16	16	20.5	13.6667	12
Ddx47	21	41.5	16.5	41	58.5	27.5	20.25
Ddx49	11.5	17.5	20.5	19.5	15	22.1667	16
Ddx50	28.5	40	35	34	42	30	43
Ddx51	25.5	11.5	6	14.5	5.5	3.33333	3
Ddx54	11.5	12.5	6.5	11	14.5	25.1667	20.75
Ddx58	15	26.5	12	27	27	24.3333	38
Ddx60	2	0.5	5.5	4	5.5	0.333333	0.5
Decr2	25.5	10.5	7	10.5	20.5	20.8333	16.25
Def6	36	81	2	10	4	18.3333	16.75
Degs1	28	52.5	144	38.5	51	178.667	157.5
Degs2	50.5	2	0	0	0	0.5	0
Dele1	20	18	9.5	15.5	9	9.5	13
Dennd2a	4	6.5	14	16	17	0.333333	0.25
Dennd3	39.5	47.5	18.5	57.5	51.5	11.8333	13.5
Dennd4b	0.5	1.5	9.5	2	2.5	1.33333	1
Dennd4c	13.5	11	4.5	5.5	16.5	7.5	13.75
Dennd5a	65.5	42.5	32	58	52.5	43.8333	59
Dennd5b	35	14	8	19	11.5	6.5	9.5
Dennd6a	21	22	19.5	14	21	23.8333	27.75
Depdc1a	0	2.5	2	10	3.5	2.33333	2
Depdc1b	0	0.5	1.5	5.5	6.5	0.833333	0.5
Depp1	25	18	11	11	39.5	348.5	252
Derl1	9.5	31	10	15	17.5	60.1667	42.5
Desi1	9.5	14	5	9	7.5	14.5	11
Desi2	3.5	10	8.5	10	5	17.6667	17
Dffb	0.5	6	5	6.5	15	1.16667	1
Dgcr2	17	42	20.5	22.5	23	39	29.25
Dgcr6	15.5	9.5	6	14	1.5	36.5	16.75
Dgcr8	21.5	18.5	8	16.5	12	7.83333	9.25
Dgka	15.5	24.5	5	12.5	5	7.33333	7
Dgkd	6	22.5	10	11	15	8.33333	13
Dgkh	5	7.5	5	11	6.5	12.3333	11.25
Dgkq	1.5	3.5	4	4	7	4	4
Dgkz	13.5	33.5	32	69	58.5	19.6667	16.75
Dhcr24	3.5	5	0	7.5	2.5	10.6667	21.5
Dhdds	14.5	14.5	6.5	14	9.5	15.1667	12
Dhrs3	37	31.5	104	30	105	2.33333	2.25
Dhrs7	13.5	9	8	17	14	30.3333	24.75
Dhx29	7.5	10	3.5	8.5	14	5.5	7.5
Dhx30	17	40.5	10	35.5	17	21	15.5
Dhx32	9	11.5	17	7	10.5	21.8333	19.75
Dhx33	2	14	3	9	16	8.83333	8.75
Dhx35	9.5	21.5	8.5	7.5	23.5	7.83333	7.25
Dhx37	2.5	3	5	6	1.5	3.33333	4
Dhx38	6	11.5	5.5	11.5	9	10.1667	11
Dhx57	4	22.5	18	9	7	3.33333	5.25
Dhx8	8	7.5	5.5	7.5	14.5	5.5	7.25
Diaph1	24.5	12	11.5	21	7.5	5.5	12.5
Diaph2	7	13.5	1.5	1.5	3.5	7.83333	8.25
Diexf	3	8.5	5.5	13	2.5	1.16667	1.75
Dip2a	25	18.5	21	21	13.5	10	14.25
Disc1	1.5	6	3.5	5.5	5.5	0.666667	1
Dkk2	1	0.5	0	2	10	5	6
Dlc1	54.5	61.5	72.5	70	30	12.6667	25.75
Dlg2	1	11	0	0.5	7	0	0
Dlg4	0	10	4	9	31.5	1	2
Dlg5	11	20	21	25	28	2.66667	3.75
Dlgap4	51	27.5	18	32	28	42	22.25
Dll1	1	3	16	46.5	23	1	0.5
Dll4	32	33.5	16.5	52	29.5	73.3333	80.75
Dlx6	0	0.5	9	6	0.5	0	0
Dmd	59	12	48.5	4	1.5	25.3333	25.75
Dmtf1	108	110	29	142	64.5	9.33333	9.75
Dmwd	27.5	47	35	31	29.5	33.8333	15.75
Dnah8	16	3.5	2	12.5	0	0.5	1.25
Dnaja3	22	14	9.5	12.5	7	24	18.5
Dnajb12	13.5	20.5	8.5	12	18	11	16
Dnajb5	7.5	28	6.5	5.5	3	14.1667	15
Dnajc1	19.5	41.5	18	22	42.5	15.3333	17
Dnajc10	46.5	52.5	19	27	24	147.833	166.75
Dnajc13	29.5	63	49	58.5	64.5	8.66667	17
Dnajc14	30.5	40.5	26.5	39	31.5	33.8333	33.5
Dnajc2	20.5	29	14.5	27.5	31	14	15.75
Dnajc3	23	24.5	12	13	14	28.1667	34.75
Dnajc5	21.5	40.5	16.5	34	26.5	44.6667	39.25
Dnajc8	197	292.5	140.5	330	193.5	91.5	82.75
Dnase1l1	11	6.5	4	9	9	9.16667	7.25
Dnase1l3	0	0	175.5	0	0	0	0
Dnlz	1.5	6	4	4	4	11.6667	10.5
Dnm2	117.5	121	70.5	96.5	91.5	54	41.25
Dnm3	42.5	23.5	1	2.5	43.5	4	5.75
Dnmbp	5	6	6.5	5	4	3.33333	4.75
Dnmt1	13	52	35.5	98.5	49.5	6	7.75
Dnmt3a	22	33	43	52	37	6.5	5
Dnmt3b	1.5	12	2	6.5	5	0.5	0.5
Dnpep	25.5	27	11	16.5	34.5	62.8333	40
Dock1	33	46	41.5	42	46	20.8333	29.25
Dock11	0.5	5	1	3.5	11	6.83333	9
Dock4	30	33	8.5	18	26.5	20	35.5
Dock6	67.5	109	82.5	109	87	8.66667	11.25
Dock9	46	34.5	8.5	30	14	40	83.75
Dok4	34	147.5	11.5	42.5	51	7.33333	5.75
Dolk	6.5	8	5	5.5	6	26	16.75
Dolpp1	7	13.5	2	12.5	15	8.5	6.5
Dpagt1	54	19	28.5	15	10.5	35.5	23
Dph1	1	3.5	5.5	4.5	14.5	7.83333	5
Dph6	9	17	12.5	17	9	9.16667	6.75
Dpm2	18	33	6	12	8.5	41.6667	31.5
Dpp4	9	13	154.5	52	9.5	3.5	1
Dpp7	1	4	10.5	4.5	4.5	14.8333	12.5
Dpp9	3.5	6.5	2	4	3	15.3333	10
Dpy19l3	1	6.5	17	14	13.5	3.66667	2
Dpy19l4	16.5	27	8.5	15.5	10.5	11	14.75
Dpysl2	18.5	17	6	41	15	20.8333	42.75
Dpysl3	1	11	27.5	47.5	22	136.5	72
Dram1	0.5	1	0	2	12.5	15	17.75
Dram2	38.5	43	16.5	37.5	14	79.5	81.75
Drosha	33.5	42.5	6.5	27.5	32	8.5	6.5
Dse	0	1	18	3.5	5.5	1.83333	1.75
Dst	38	31.5	14	75.5	26	25.3333	63
Dtd1	11.5	18.5	15.5	13.5	14.5	11	7.75
Dtnbp1	6.5	17	17	10	13.5	35.3333	21.75
Dtx3	7.5	14.5	23.5	19	31	7.66667	6.25
Dtx3l	6.5	11.5	4.5	10.5	17.5	4.16667	6.25
Dusp1	84	25	30.5	115.5	109.5	251.333	186.25
Dusp12	16	16.5	12.5	21.5	22	13.1667	9
Dusp16	10	15	6.5	9.5	9	5.16667	11.75
Dusp2	3.5	25	6	4.5	25	1	0.5
Dusp22	40	30.5	7	4	6	17	16.5
Dusp3	85	22	28	32	25.5	54.3333	89
Dusp6	61	108.5	33.5	124	107	122.667	110.5
Dusp7	46.5	15.5	37.5	52	6.5	23	14
Dvl1	3.5	16	5.5	10	11	27	19.5
Dync1h1	116	100	48.5	84	80.5	28.3333	72.25
Dync1li1	30	37	14.5	31	37.5	54.3333	44.75
Dynll2	22.5	67	37	32	34.5	8.16667	14.5
Dynlt3	61	60.5	33	36	57	152.667	152
Dyrk1b	3.5	6.5	4	7	8	5.16667	3.75
Dysf	14.5	18.5	32.5	16	43	12.1667	29.75
E130309D02Rik	2.5	11	3.5	6.5	2	17.1667	10.25
E2f1	0	2	1.5	7.5	3.5	4.66667	2
E2f3	1.5	3	2	2.5	7.5	3	4.5
E2f4	2.5	8.5	7	7.5	5	13.3333	10
E2f6	4.5	16	5	15	5.5	13	11
E330009J07Rik	12	19.5	0	1	2.5	1.66667	2.5
Ece1	105.5	139	102	220.5	112	150.167	247.25
Ech1	18	19.5	12.5	20.5	17.5	60.6667	40.25
Eci2	28	113.5	28	39	36.5	49.8333	45.25
Ecm1	24.5	44	15.5	16	22	135.5	60
Ecpas	43.5	56	33	54.5	50	18.1667	30.5
Ecscr	9	76.5	20.5	101	60	254.5	202.25
Ect2	0.5	15.5	10	26	21.5	3.66667	3.5
Edc3	13.5	29	12	57.5	30.5	5	2
Edil3	0.5	4	0.5	14	2.5	0.333333	0.5
Edn1	34.5	21.5	19.5	39	13.5	449	490.75
Edn3	22.5	5.5	0	1	0	0	0
Ednrb	1.5	7.5	61.5	22	232	12	8.5
Eef1b2	230.5	459	262.5	306	490	310.167	491.25
Eef2	440.5	910.5	405.5	871	921	463.333	678
Eefsec	4.5	4	1.5	9.5	7	8.83333	7.75
Efcab14	10	8	14	15.5	6	19.8333	21.75
Efcab7	5	3.5	1	24.5	7	3.16667	3
Efcc1	1	6.5	6	1	0.5	0	0
Efna1	11.5	14.5	11	31	40.5	44.1667	46.5
Efnb1	3.5	4	25	33.5	21.5	9.16667	6
Efnb2	11	14	21.5	93.5	111	31.6667	44.5
Efr3b	53	45.5	1	5.5	8.5	2.66667	6.5
Eftud2	70	116	55	133	125.5	34.1667	23.25
Egfl7	320.5	664.5	579.5	1146.5	941.5	583.333	561.25
Egfl8	30.5	82.5	0.5	11	19	2.83333	3.25
Egflam	16.5	16	0	3	0	0	0.5
Egln1	15.5	23.5	6.5	7.5	10.5	28.8333	21.75
Egln3	0	0	3.5	0	42	14.3333	15
Ehbp1l1	6.5	8.5	7	16	22.5	36.3333	29.5
Ehd1	107.5	78.5	62.5	244	69.5	85	66.5
Ehd2	27.5	23	5.5	109.5	44	63.3333	91.25
Ehd3	4	1	115.5	1	12	14.6667	11.75
Ehd4	106.5	29.5	19	170	150	138	263.25
Ehmt1	75	115.5	52	96	79.5	7.66667	11
Ehmt2	18	41	48	57.5	49.5	20.8333	25
Ei24	55.5	81.5	37	48.5	52	102.667	87.25
Eid1	42	98.5	75	115.5	99	62.5	59
Eif1ad	9	36.5	16.5	13	20	17.8333	15.25
Eif2ak4	10.5	6.5	5.5	9	4	3	4.25
Eif2b2	19.5	85.5	26.5	39	41.5	138.5	127.5
Eif2b5	7.5	7.5	5.5	10	11	48.8333	33.5
Eif2s1	15.5	45.5	18	31.5	52	83	44.75
Eif3e	69.5	109.5	66	98.5	159.5	137.667	111
Eif3f	55	80	37	69.5	81	50.3333	57
Eif3h	163.5	237.5	83	169.5	316.5	145.333	134.75
Eif3k	61	66	21.5	48.5	47.5	153.5	113.5
Eif4a1	152	317	104	473.5	381.5	312	231.25
Eif4b	76	185.5	116.5	156	132.5	35.3333	52.75
Eif4e2	46.5	118.5	49	71.5	97	75.1667	51.5
Eif4e3	3.5	2.5	5	7	15	4.66667	5.25
Eif4ebp1	4	4.5	11	11.5	1.5	189.833	83.25
Eif4ebp2	13.5	10.5	7	15	9	10.8333	6.5
Eif4enif1	33	96.5	46	61	53	7.66667	9
Eif4g1	123.5	332	166	333	269	78.6667	116.5
Eif4h	150	143.5	75	140.5	106	176.667	133.25
Elac2	18	20.5	3.5	9.5	6	7	5.75
Elavl1	44.5	34	12.5	27	35	72.8333	50
Elf1	21.5	10.5	16.5	13.5	25.5	17.1667	20.75
Elf2	47	48	36.5	71	69.5	26	29.75
Elf4	0	1.5	3	9.5	8	2.83333	3
Elk3	103.5	200.5	269.5	390	217	37.1667	39.5
Elk4	470	234.5	118.5	187.5	202.5	20	30
Elmo1	8	24	0.5	25	20	9	9.25
Eln	22	18	31.5	340.5	68.5	0.833333	1.75
Elovl1	27	27	14.5	33	20.5	100.5	65.5
Elovl5	39.5	28	15	34	43.5	72.1667	73.25
Elovl7	26	5	0.5	0	0.5	22	13
Elp3	14	18.5	10	16.5	14.5	17.1667	15.75
Emc10	26	32.5	19.5	24	16.5	70.6667	45
Emcn	138.5	54	44	136	338.5	1397.17	1514.5
Eme2	3	5	7	6	7.5	5.5	5.25
Emg1	2	11	10	14	12.5	63.1667	42.5
Emid1	1.5	0.5	2	19.5	48	0	0
Emilin1	2.5	2.5	19	21	17.5	2.66667	2
Eml1	32.5	10.5	8	59	18.5	53	52.5
Eml3	25	59.5	27.5	64	36.5	14.6667	12.5
Eml4	5.5	9	11.5	9.5	9	6.83333	9
Emp1	8	5.5	6	153	121	477	514
Emsy	42.5	23	14.5	24.5	39	2.83333	5.25
Enc1	10	14	3.5	8.5	4	22.8333	37.5
Endod1	21.5	11.5	0	9	13.5	110.333	114.75
Endov	2.5	9.5	9	14.5	5.5	4.33333	2.75
Eng	271.5	275	195	204	194	270.5	363.75
Engase	4	4.5	8	1.5	1	2.83333	2
Eno1b	49.5	25	11.5	12	13	245.167	351.75
Enox2	7.5	5	10.5	5	5.5	6.5	10
Enpep	2	2	24.5	8	25.5	0	0
Enpp2	57	91	0.5	11	2.5	13.3333	22.25
Enpp3	10.5	9	0	1.5	25	0	0
Enpp4	12	2.5	4	8.5	3.5	17.3333	21.75
Entpd1	151.5	85.5	17.5	61.5	123	20	29.5
Entpd4	10.5	12	11	10.5	4	37.8333	33.75
Eogt	175.5	268.5	10.5	76	93	64.5	70.25
Epas1	835	497	224.5	880	169	81.1667	136.5
Epb41l2	88.5	66	264.5	171	90	20.5	33.75
Epha2	3	9.5	5	16	11.5	59.5	74.5
Epha4	37.5	11	2	6	5	17.5	25.5
Ephb1	0	1.5	0	2	10.5	0	0
Ephb4	14.5	14	19	29.5	23	22.1667	17
Ephx1	75	7	4	10	14.5	97.5	91
Epn1	21	58.5	36	47	33.5	35.3333	49.75
Epn2	47	40.5	20.5	27.5	26.5	36.8333	48.75
Eps15l1	19.5	37	27.5	34	24.5	11	13.25
Eps8l2	44.5	6.5	0	2.5	4.5	10.8333	14.75
Erap1	189.5	34	19.5	49	66.5	20	24.75
Erc1	34.5	24.5	26.5	31	29	9.16667	11.75
Ercc5	9.5	21.5	4.5	12.5	4.5	6.16667	10.75
Ercc6l2	8	25	10	11.5	12	3.83333	4.75
Erf	2	6	5.5	11.5	8	11.8333	21.5
Erg	123	127.5	77.5	102	138	59.5	154
Eri3	46	164	93.5	95	111.5	37.5	21.75
Erlin1	7	8.5	97.5	31	3.5	9.66667	9.5
Ermp1	15.5	9	9	7	6.5	9	13.25
Ero1l	12	6.5	6	11	7	35.1667	36.75
Esam	1084	965	348.5	765.5	455.5	628.167	532.75
Esco1	4.5	8.5	5	9.5	13.5	9	11
Esm1	0.5	3.5	3	5.5	45.5	19.1667	89
Esrra	3	4.5	6	15	5.5	11.8333	11.75
Ess2	15.5	21	8.5	11	6	11.1667	8.5
Esyt1	47	50.5	6.5	27	16.5	67	68.5
Esyt2	166	72.5	13.5	30	28	114.167	130.25
Etfbkmt	1	3	2.5	1	11	1.16667	1
Etfdh	22	42.5	10	19	21	20.6667	19.5
Etl4	26.5	34	31	70	68	1.33333	1.75
Ets1	273	314.5	195.5	282	214	84.6667	118.25
Ets2	35	32.5	71.5	58.5	74.5	40.5	37.25
Etv3	5	5	3	5	3.5	6	9
Etv6	8.5	14.5	10.5	17.5	14	18.3333	15.75
Eva1a	1	10	3.5	6.5	12	2.66667	1.5
Eva1b	19	22.5	28.5	17	25	62.3333	38.5
Evi5l	15	28	14.5	12.5	4	3.83333	4.5
Exd2	3	13	10.5	7.5	8	5.66667	5.5
Exo1	0	6.5	1.5	15.5	5.5	1.83333	1
Exo5	16	5	4	8.5	10	4.83333	4
Exoc2	12.5	20.5	11	9.5	15	28.8333	28.5
Exoc3l	9	66	42.5	37.5	30.5	22.1667	18.75
Exoc3l2	0.5	0	32	1	48	1	1
Exoc5	30.5	84	29	40.5	43	62.5	73
Exoc6	15	11	16.5	8.5	5.5	38.5	32
Exoc6b	21	32	22.5	20.5	17	13	19.5
Exosc10	18.5	23.5	14.5	22	21.5	21.3333	18.75
Exosc5	4	17	1.5	5	6.5	29.5	15.5
Exosc6	4.5	5.5	6.5	0	8	3.66667	0
Ext2	31	44	22	43.5	31.5	64.1667	44
Extl3	122	64.5	2	15.5	10.5	21.5	32.75
Eya3	11	14	7	16.5	14.5	11.1667	13.75
Ezh1	22.5	18	10	13.5	15	15.1667	13
F11r	72	85.5	45	81	77.5	138.833	118.75
F2r	10	28.5	52.5	26	49	206.667	286.75
F2rl3	0	2.5	0	1	7.5	10.1667	8.5
F8	0	0	57	0	25.5	0.5	1
Fabp4	0.5	6	431.5	9	1151	12.3333	14.25
Fabp5	0	9	99.5	19.5	94	18.1667	8.75
Fabp9	0	0	0	0.5	13.5	0	0
Fads1	26.5	28	19	42.5	11	27.6667	26
Faf2	17.5	41	23	34	26	35.5	29
Faim	82	130.5	17.5	27.5	27.5	27	26.75
Fam102a	7	12.5	53	16.5	41	2.33333	3.5
Fam102b	2	15	4	5	5.5	16.8333	25.5
Fam104a	8	6.5	6	7	8.5	15	10
Fam110a	3.5	2.5	4.5	6.5	12	3.66667	2.25
Fam111a	4	12	10.5	15	9	10	15.75
Fam114a2	11.5	32	20	23	38	17.5	18.75
Fam117b	12	11	11	24.5	34.5	20	20.5
Fam118a	22	36	11	10.5	6.5	22	20
Fam118b	18.5	29	8.5	17	11.5	21	17.5
Fam122b	2.5	3.5	6.5	7	7.5	2	1.25
Fam124a	0	0.5	107	5.5	0	1.83333	1.25
Fam124b	3	10	0	9	0.5	1	0.75
Fam126a	6.5	11	10.5	21.5	12.5	15.8333	21.25
Fam129a	15	35.5	3	3.5	0.5	22.3333	20
Fam129b	86	33	11.5	61.5	46.5	102.5	103.75
Fam133b	13.5	7.5	6	11	14	7.16667	11
Fam135a	7	13	10	25.5	13	10	8.5
Fam13a	10.5	29.5	0	6.5	1	1.5	0.5
Fam13c	37.5	12.5	0	6.5	4.5	1.83333	2.75
Fam160a2	14.5	13	6.5	11	16	12	7.25
Fam160b1	5	9.5	3	4	4	8	9
Fam167b	0.5	0.5	173	16.5	146.5	1.33333	1
Fam171a1	18.5	17	19	29	29	37.1667	23.5
Fam171a2	3.5	21	9.5	23	28.5	7.83333	10
Fam174a	17.5	10	4.5	5.5	6	27.1667	22.75
Fam174b	2	7	56.5	28	10.5	1.5	0.75
Fam181b	16.5	2.5	0	12.5	4	7.16667	4.75
Fam189a2	13.5	9.5	5	4.5	2	3	1.5
Fam189b	1	5	7.5	5	5	5.83333	1.25
Fam192a	56	71.5	39	63	53	17.6667	18
Fam193b	11	47	25	28.5	21	4	6.25
Fam20a	5	0	14.5	1.5	0	2.16667	1.75
Fam214b	5.5	13	7.5	7.5	4.5	36.1667	29.5
Fam217b	0.5	4	0	1	16.5	2.16667	3.25
Fam219a	6.5	4.5	6.5	7.5	4.5	7	11
Fam220a	22	6.5	4.5	7	7	21	22
Fam222b	7.5	6.5	9	5.5	4	10.8333	6.75
Fam241a	5	7	1	2.5	2	11.6667	10.25
Fam3a	7.5	13	8	10	9.5	12.5	12.5
Fam3c	44.5	51	65	52	35	36.6667	39
Fam43a	22.5	53	29.5	22.5	33.5	141.833	74
Fam49a	0.5	6	7	4	8	9.66667	11
Fam53a	3	7	3.5	10	22.5	22.3333	12.5
Fam53b	3	2	29.5	10.5	14	17.8333	25.75
Fam53c	4.5	10	2.5	5	5.5	15.6667	8.5
Fam57a	15	50.5	12.5	21.5	14	47	36
Fam71a	2.5	1.5	12	12	9	0	0
Fam76a	87.5	50	34	34.5	28.5	26	21.25
Fam76b	9	9	7	12.5	6.5	8	10.5
Fam83d	0	1.5	1	11	3	3.5	2.5
Fam84b	5	8	1	11.5	3.5	14.3333	8.25
Fam89b	4.5	7	4.5	7.5	15.5	57.6667	29.25
Fam98c	12	12	3.5	4	4	15.8333	7.5
Fanca	0	9.5	5.5	17	4.5	1.16667	0.5
Fance	25	11.5	6.5	8.5	15.5	7.5	5
Fancg	1.5	11	2	2.5	7	4.5	3.5
Far2	12.5	12	0	0	0	9	8
Farp1	12.5	26	20	29	18.5	7.16667	7.25
Farsb	24.5	19	4.5	20	14.5	68.6667	50.25
Fas	19.5	1.5	17	11.5	29.5	9	7.5
Fasn	2.5	7.5	3.5	14	15	8.16667	16
Fat4	8	10	8	13	11	6.83333	9.25
Fau	163.5	156.5	97	127.5	262.5	666.5	680.5
Fbf1	11.5	30	31	32	37.5	5.5	10
Fbh1	40	101	44	70	62.5	29.8333	28
Fbl	19	39	18	54	34.5	40.1667	23.25
Fbln1	0.5	10	0	2.5	3.5	1.33333	1
Fbln2	6.5	12.5	24	43.5	34	30.1667	29
Fbln5	32	16.5	3.5	112	44	62.1667	26.75
Fbn1	1	1	10	19	5.5	6.33333	12
Fbrs	10.5	19	10	12	12	4.66667	5.25
Fbxl17	17.5	68.5	43	22	42.5	15.5	13
Fbxl6	1	5.5	1.5	5.5	3.5	16	9
Fbxl7	2.5	3	11	6.5	5.5	7.33333	4
Fbxo28	17	16	13.5	16	26	24	25.25
Fbxo5	1	2	4	15.5	6	3.16667	2.5
Fbxo6	36.5	21.5	10	6.5	23	85	44.25
Fbxw11	32	45	15.5	22.5	40	52.8333	38.75
Fbxw17	11.5	15.5	14	7	20	12.8333	10
Fbxw2	123.5	59.5	40	65	44	66.3333	58.5
Fbxw4	22.5	4.5	11	8	8	6.66667	7.25
Fbxw7	8.5	15	3.5	10.5	11.5	5	8.75
Fbxw8	9	13	5	15	8.5	41.6667	34
Fcf1	8.5	11	8	9	19	67.5	43.25
Fcgr2b	0.5	1	321.5	2.5	1	0	0
Fcgrt	219.5	126.5	165.5	19	30	63.5	38.75
Fcho2	122	134	109.5	99	103	12.3333	13
Fchsd1	10.5	3.5	7	17.5	4	2.16667	2
Fchsd2	20	32.5	105.5	65.5	47.5	10	17.75
Fen1	2	9	5.5	21.5	7.5	13	9.25
Fer	15	21	35.5	19.5	17	10	10.25
Fermt2	166	174	88.5	189.5	117.5	157	155.5
Fes	5.5	20	31.5	53.5	36.5	16.6667	15.25
Fez2	29.5	21	27.5	17	23.5	188	131
Fgd5	25.5	40.5	29.5	48.5	48	16.8333	33
Fgd6	6	9.5	13	7.5	8	1.83333	2.75
Fgfbp1	1	15.5	0	0	0	1.66667	2.5
Fgfr3	2	8	7	24.5	11.5	0.333333	0.5
Fhl3	1.5	7	2	3	3.5	17	27
Filip1	32.5	35.5	44	41.5	46	3.66667	12
Fkbp10	2	104	16.5	82	80	30.1667	15.75
Fkbp14	4	6.5	3.5	5	4.5	23.6667	31.75
Fkbp15	16	14	16	18	17.5	8.16667	11.5
Fkbp1a	103.5	216.5	133.5	240	216	1452	586.5
Fkbp5	0	6.5	19	13	16.5	22.5	23.5
Fkbp9	22	34	16.5	19.5	20.5	80.6667	84
Fli1	37	94.5	35.5	58.5	42.5	45	52.25
Flii	29.5	15	13	16.5	11.5	48.3333	51.25
Flna	57.5	199.5	51.5	271.5	155.5	332.5	369.5
Flnb	47.5	25.5	19.5	48.5	13	252.833	386.25
Flrt2	21	21	5.5	1.5	11.5	10.5	5.5
Flrt3	0	0.5	2.5	2	25	0.166667	0.25
Flt1	1154.5	537.5	107	72	104	64	116.75
Flt4	17.5	18	51	10	12.5	27.5	39.75
Flvcr2	15	31	0	0	0	2.16667	1.75
Flywch1	12	14	17	18.5	15	22.3333	24.75
Fmn1	0	0	13.5	0	3	0.333333	0.75
Fmnl2	8.5	12.5	9	5	17	4.5	9.25
Fmnl3	88	82.5	27.5	61	77	16.5	17
Fmo1	32	29	54	254	11	1.5	1
Fmo2	103.5	3.5	0.5	51.5	44	8.16667	11.25
Fmo5	13	4.5	2.5	3.5	1.5	2.66667	1.5
Fn1	1268.5	1989	12	313.5	84.5	779.333	1346
Fnbp1l	70	60	41	56.5	51.5	7.16667	13
Fndc1	0.5	45	1	3.5	0	1	0.5
Fndc3b	8	10	10.5	18.5	8	38.3333	53.75
Focad	9.5	11	2	5	3.5	5	4.25
Fosl2	10	5	5.5	6.5	15.5	39.3333	64.5
Foxc1	20	16	0.5	1	1	16.5	17
Foxf1	9.5	9.5	0	102.5	0	16.8333	8.5
Foxf2	36	49	0	1	0	32.5	26
Foxj2	15.5	7.5	11	12	12.5	6.16667	4
Foxk1	6	8	2.5	6.5	4	2.5	4.75
Foxl2	7	4	0	0	0	5.83333	2.25
Foxm1	1	7	7.5	24	13	3.16667	2.75
Foxn2	9	4.5	9.5	19	10	10.6667	13.75
Foxo1	10	11	7.5	9.5	6.5	14.5	13.25
Foxo4	7.5	7.5	6	8.5	8	2	4.5
Foxp1	64	75	29.5	87.5	46.5	38	31
Foxq1	26	25.5	0	0	0	2	3
Fpgs	2.5	8	5	13	19	6.5	5
Frem1	0	8	0	3	1	0	0
Frmd4a	6	88.5	145.5	178	97.5	10.1667	11.25
Frmd4b	119.5	75	25	33.5	44	13.6667	23.5
Frmd6	7.5	13.5	1.5	10.5	4.5	15.3333	18
Frmd8	7.5	7.5	7.5	20	6.5	40.3333	25.25
Frrs1	11.5	11.5	13.5	3	9.5	2.66667	1.25
Fry	134	75.5	2	12.5	10	12.6667	18.25
Fryl	104	52	40	43	38.5	12.5	28
Frzb	0	13	0	0	1.5	114.167	122
Fscn1	10.5	448	94.5	239	172.5	78.8333	67.75
Fstl1	14	33.5	110.5	490	510	120.5	171
Fth1	1976	6707	391.5	463	557.5	6759.17	2757
Fto	34.5	25.5	19.5	23	14.5	13.3333	9.25
Fubp3	11.5	51	25.5	43.5	44.5	21.6667	24
Fundc2	43	111	40	77	158.5	31.5	39
Furin	41	60	13	56.5	46.5	34.1667	32
Fut8	92	52.5	4.5	12.5	18	12	15.5
Fxr2	38.5	68	59	117	67	27	25
Fxyd5	107.5	65.5	27	41.5	52	305.333	284.75
Fyco1	31.5	17.5	6	7	5	2.83333	4.75
Fyn	32.5	162	214.5	138.5	174	41	39.75
Fyttd1	16	24.5	19.5	18	20	50.8333	49.75
Fzd4	21.5	15	19	36.5	15.5	29.8333	37.25
Fzd6	98	86	9.5	22.5	14.5	39	56
Fzr1	2	11	4	14	7	13.8333	6.75
G3bp1	34.5	26	13	24	24	38.8333	37.5
G3bp2	45	83.5	41	41	62.5	46.8333	41.75
Gab1	29	48	16	18.5	10.5	14	9
Gab2	7.5	6	7	11	6	9.83333	14.25
Gabarapl1	72.5	142.5	31	29.5	49	80.6667	71.25
Gabpb1	70.5	39	15	28.5	28	31.6667	22.25
Galnt1	40	94.5	75	81	68	116.167	160
Galnt18	4.5	11	10	17.5	10	12.6667	16.75
Galnt2	21.5	3	24	9	5	30.6667	35.5
Galnt7	4.5	13	4	5	18.5	5.16667	7.75
Galt	13	20	2.5	2.5	2	31.3333	24.5
Ganc	10	13	13.5	8.5	13.5	3.66667	3.75
Gapvd1	65	92	55.5	58.5	72.5	28.3333	30.5
Gar1	30.5	35.5	11	24	42.5	18.1667	11.75
Gas2l1	7	11.5	17	12	11	69.3333	33.5
Gas2l3	1	20	1.5	42	9.5	2.33333	1.75
Gas6	44.5	10	13	10.5	21	98.6667	133.25
Gas7	0.5	8.5	15	3	21.5	8	7.75
Gata2	64	14.5	4	38	14	31	31.25
Gata3	0	16	0.5	26	0.5	0.333333	0
Gata4	0	0	55	0	0	0	0
Gatad2a	97	97	60	105.5	81	48.8333	41
Gatc	17.5	23	10	22.5	21.5	6.83333	5.5
Gatm	64	84.5	229.5	2	16	6	5.25
Gba2	3	16.5	7	9.5	12	4.5	2.5
Gbe1	39	20	3.5	6	5	19.5	14.75
Gbf1	69	74	42.5	68.5	39.5	12	11.75
Gbp10	0	0	1	22	36.5	0	0
Gbp2	41	7.5	9	52	217.5	16.8333	17.5
Gbp3	27.5	16.5	9.5	32	86.5	8.66667	7.75
Gbp4	9	5.5	8	53.5	57	3.83333	3
Gbp5	29.5	3.5	2.5	9.5	40	1.5	0.75
Gbp7	45	23	13	68	115	4.66667	7.25
Gbp9	33	24.5	31.5	92.5	126	7.66667	9
Gcc2	29.5	142.5	53	126	86.5	3.83333	8.5
Gchfr	0.5	4.5	21	25	21.5	12.3333	3.75
Gcn1l1	31	91.5	60	47.5	36.5	13.1667	18.75
Gdpd1	2.5	7	1	7	3.5	11.1667	11
Gdpd5	8	20	5	14	12.5	22	19
Gem	5	13.5	8	58.5	101.5	4	4.5
Gemin2	2.5	5.5	1.5	5.5	7.5	6.5	4.25
Gemin5	2	5	3.5	4	8.5	4.16667	5
Gfer	3.5	18	4	7.5	7.5	28	20.75
Gfm2	21	12	6.5	9	10	8	9.25
Gfod2	3.5	5.5	3	5.5	8.5	7.83333	6
Gga1	10.5	33	18.5	15	16.5	15.6667	11.25
Gga2	3	12	8	9	7	10	7.25
Ggact	41	13.5	1	1.5	4	14.1667	13.5
Ggh	12.5	6	5	8.5	11.5	31.1667	22.5
Ggta1	7	35.5	23.5	47.5	18	20.8333	26
Ghr	8.5	13	11.5	44	11.5	86.3333	58.75
Gid8	28	19	16	19	23.5	12.8333	15.75
Gigyf1	9	5	15	13	10.5	1.33333	2
Gimap1	68	45.5	35.5	69.5	54.5	39.1667	31.5
Gimap4	35	85	230	306	606	5.16667	6.5
Gimap5	10.5	16	18.5	43.5	83	20.5	20.5
Gimap6	52	61	140	115.5	288.5	69	77.75
Gimap8	20.5	22.5	28	44	45.5	16.3333	22.5
Gimap9	54.5	26	28	42.5	40.5	7	8.25
Ginm1	126.5	88.5	32.5	47	44.5	91.1667	71.5
Gins1	0.5	6	1.5	4	14	2.5	1.5
Gins2	0	8.5	2	12	4	11.1667	7.75
Gipc1	12	42.5	27	48.5	38.5	103.167	58.5
Git1	15	36	14	36	40	25.3333	16.25
Git2	245	335.5	130	392.5	109.5	20.5	35
Gja1	265	220	129.5	13	93	18.6667	14.5
Gja4	21	29.5	11	69	21.5	5.66667	3.25
Gja5	2	2.5	8	20	9	15	15.75
Gjc1	65.5	58.5	19.5	95.5	11.5	7.5	7.5
Gkap1	31.5	27.5	21.5	36.5	34	12.8333	14.75
Gkn3	49	4	0	0.5	0	0	0
Glb1	7	10.5	5.5	5	11.5	18.5	24.25
Glg1	23	26	11	29.5	17.5	46.5	49.75
Gli3	0	4	0	4.5	10	0.333333	0.5
Glipr2	1	7.5	3.5	4.5	10	195	124.75
Glis3	0	0	0	9.5	2	4.33333	4.25
Glmp	33	56	23	35	28	215.667	152.5
Glod4	155.5	173.5	117	102	148	61.5	51.25
Glp1r	0	0	3	122.5	0	0	0.25
Glrx3	40.5	47.5	31	51.5	60.5	130.667	91
Gltp	162.5	84	34	113	34.5	81.3333	41.75
Glul	537	355.5	143	249.5	106.5	84.1667	162.25
Gm10031	26	19	9.5	16.5	18	1.33333	0.5
Gm10131	11	30.5	14	29	21.5	26	52.75
Gm10184	1.5	16	12	29.5	12	13.8333	38.75
Gm10260	245	491	221.5	351	595.5	58.1667	35.25
Gm10718	545.5	26	2160	1208.5	25.5	0	0.5
Gm10719	119	34	1505	1089	4	0	0.25
Gm10800	1061.5	162	14799.5	7547	91	0.5	1.75
Gm10801	188.5	33.5	2826.5	1136.5	14	0	0.25
Gm10985	0.5	0	79.5	50.5	6	0	0
Gm11808	37	146.5	99.5	102	270	498	698.5
Gm12166	0	0	0	2	14	0.5	0
Gm13212	1.5	8	3.5	2	2.5	2	4.25
Gm13889	11.5	4.5	26.5	34.5	37.5	7.83333	5
Gm14326	27.5	7	5.5	3.5	24	11.1667	10.75
Gm14391	29.5	2.5	10	1.5	8	3.5	5.5
Gm14399	18	66.5	46	1	17.5	3.5	4.25
Gm17018	7	9.5	13.5	12	10.5	16.1667	13.5
Gm17655	3.5	3.5	19.5	2	2.5	1.33333	1.5
Gm20695	0	3	1	0	8	1.16667	0.75
Gm21738	75	45.5	1312.5	597	17	0.166667	0.25
Gm21860	0	0	36	1	0	0.5	0.25
Gm21970	56	14	4.5	3.5	11	0	0
Gm21992	1	6.5	1.5	1	10	9.33333	12.25
Gm28036	4.5	19.5	5	21.5	18.5	5	5.25
Gm28048	24.5	14	9.5	3.5	12.5	3.16667	2.75
Gm28053	9	39	3.5	14	0	4.5	7
Gm29394	0.5	42	17.5	18.5	0	1.33333	1.75
Gm4070	23.5	12	5	42	97	195	318.25
Gm43191	13.5	25	6.5	22.5	6.5	0	0.25
Gm43552	0	12.5	8	3.5	0	0.166667	0
Gm45716	1	10.5	5.5	8.5	6	1.33333	1
Gm49322	0.5	2.5	8	7.5	14	0	0
Gm49337	26	11	5.5	18.5	12.5	0	0
Gm49342	23.5	45	31	34	4	44.6667	170.75
Gm49345	15	12	5.5	6	8	0.166667	0.5
Gm49354	102.5	22.5	8	2	20.5	0	0
Gm49391	33.5	85.5	33.5	25.5	5	270.667	359
Gm49392	4.5	1	2	5.5	0.5	4.16667	3.75
Gm49393	11.5	13	6	6.5	0	5.33333	10.75
Gm49395	0.5	15.5	1.5	3	5.5	4.66667	5.5
Gm4951	0.5	0	7.5	2	9.5	0	0
Gm6356	0.5	2	0	0	6	0	0
Gm9803	2.5	10	1.5	7.5	6	22.8333	31
Gmds	6.5	12	4.5	11.5	8	9.5	8.75
Gmeb1	4.5	13.5	13.5	13.5	8.5	3.16667	4.5
Gmfb	18	57	66.5	16.5	51.5	74.1667	58
Gmfg	1	25.5	52.5	63.5	54	13	12.75
Gmnn	9	28	9.5	23.5	21	8.16667	7
Gmpr	14.5	41.5	27.5	6	6	15	9.25
Gmpr2	8	25	5.5	10.5	22	22	15.5
Gna11	30	36.5	25	68	39	47.5	40.25
Gna12	9.5	15.5	20.5	34	23.5	118	73.25
Gna14	0	0.5	0	19.5	0	4	2
Gnai2	673.5	1361	343	920	576.5	859.333	560
Gnas	631	823.5	262	603.5	821.5	680.333	596.5
Gnb1	197	138	87.5	149	138.5	372.167	289.75
Gnb4	97.5	86.5	25	47.5	31.5	147	50.75
Gne	58	37.5	19	30	40.5	46.6667	30.75
Gng11	77.5	101.5	92.5	77	100.5	403.667	354
Gng12	46.5	62.5	49	36.5	35.5	117.667	78
Gng5	41.5	49.5	18	25.5	50.5	1472.33	989
Gngt2	3	7	34	24	43.5	71.5	64.25
Gnpda1	1	9	28	2.5	3	10.3333	7.25
Golga3	11	16	14	14	9.5	8.5	15.25
Golga4	62	51.5	41.5	46.5	39.5	7.33333	15.25
Golga7	41	39	80.5	34.5	45	91.1667	65.25
Golim4	442	319	50.5	125.5	81.5	14.6667	26
Golm1	25	79	11.5	24.5	36.5	14	20.75
Gon4l	19.5	16	10	22	17	2.33333	5.25
Gopc	29	12	10	7	6	11.5	14.75
Gorasp1	1.5	8	8	10.5	0	4.5	3
Gosr2	31.5	30	16.5	16.5	20	56.3333	44.75
Gpalpp1	6.5	6.5	3.5	4.5	4.5	9.83333	13.5
Gpank1	8	3	4	19	18.5	8.83333	5.5
Gpatch1	5.5	5.5	4	12	4.5	2	3
Gpatch11	16	29.5	7.5	31.5	20.5	10.3333	9.5
Gpatch2	4	9.5	13.5	10.5	5	3.33333	4.25
Gpbp1l1	14	13	6.5	10.5	11.5	12.8333	17.75
Gpcpd1	316.5	242.5	28	30.5	16	30.1667	33.75
Gpd1l	7.5	6.5	3	6	7.5	6.66667	6.75
Gpd2	148	247.5	18.5	40	86.5	23.3333	29
Gpihbp1	0.5	4	218.5	83.5	120	9	7
Gpr107	55	27.5	31	40	27.5	34	28.75
Gpr108	12.5	13	3	8	7.5	20.1667	14
Gpr137	4.5	20.5	12	19	11.5	26.5	19.5
Gpr146	26.5	7	5	6.5	5	14.3333	14.25
Gpr160	43.5	2	1	0	1	0.333333	0.5
Gpr182	1.5	1.5	86	11.5	11.5	8.83333	3
Gpr4	26.5	22	5.5	2.5	7	41.3333	20.5
Gprc5a	0	0	0.5	6	5.5	15.6667	4.25
Gprc5b	8.5	7.5	2	1.5	22	19	37.25
Gps2	20	16	10.5	20	26.5	11.5	10.5
Gpsm3	1.5	5	3	2	12.5	5.33333	5
Gpx1	176	120	67.5	71.5	105.5	1169.17	517.25
Gramd1a	5	39.5	26.5	36.5	38	13	12
Grap	88.5	86.5	34.5	45.5	22.5	145.5	125.5
Grasp	43.5	19	15.5	32	19.5	16.6667	17.75
Grb10	16	34.5	62.5	46	87	26.6667	28.25
Grb14	48.5	45.5	0	8	6.5	4.16667	4.5
Grb2	72	82	47.5	55.5	59.5	26.3333	21.5
Grcc10	58	106.5	46.5	29	56	242.667	107.5
Greb1l	0	0	84.5	0	0	0.5	0
Grk2	192.5	66	57.5	87.5	26	33.6667	32
Grk5	17.5	18	2	12.5	6.5	11.8333	19.75
Grk6	8	11	9.5	18	13.5	33.8333	22
Grrp1	8	12.5	3	9.5	3	2.5	2
Gsdmd	13.5	15.5	9.5	29	12	13	12.5
Gse1	7	6	5	10.5	7	1.33333	1.75
Gspt1	39	102	34.5	67	65.5	50.1667	51.5
Gstk1	22.5	12	35.5	14.5	11	10.3333	8.5
Gstm1	208.5	71.5	7	95.5	23	98.5	47.25
Gstm2	15	4	8.5	14.5	10	63	69.25
Gstm7	26	24	0	2	4.5	3	3.5
Gstt2	6.5	16	5	7	3	23.6667	17
Gtdc1	11	20	5.5	9	24.5	6.5	6
Gtf2e2	31.5	37.5	16.5	31	32	20.5	17.75
Gtf2f2	4.5	11	9	12	17.5	21.1667	17
Gtf2h2	20.5	22.5	13	22.5	8.5	16	12
Gtf2h4	12.5	4.5	6	14	8	17.1667	10
Gtf2i	249	293	91.5	179	141	8.83333	14.5
Gtf2ird1	51.5	43	20	69.5	41.5	8.66667	8
Gtf3a	6	8.5	6	16	10.5	30.6667	16.75
Gtf3c1	9.5	22.5	23	33	17	10.8333	18.5
Gtf3c4	4	9.5	4.5	5.5	9.5	6	6.75
Gtf3c5	7.5	13.5	3.5	15.5	21.5	6.33333	4.5
Gtpbp2	25.5	36	31	37	40	11.8333	17
Gtpbp3	2	10	3.5	9	9	11	9.75
Gtpbp8	2	4.5	7	5.5	3.5	11.1667	7.75
Guk1	13	19	7	250.5	8.5	68.6667	29.75
Gulp1	5.5	9.5	0	21.5	3.5	25.3333	32
Gusb	13	32.5	9	22	19.5	24.8333	36.5
Gvin1	17.5	2	3.5	15.5	35	67.5	136.75
Gxylt1	14.5	15.5	10.5	18	11.5	11.6667	14
Gxylt2	0	0	0	6	0.5	0.166667	0
Gyg	21	19.5	13.5	34	13.5	33.8333	30.5
Gypc	1.5	2.5	21.5	13	10.5	2.33333	1
Gzf1	46.5	21	7	16.5	25.5	5.83333	7.25
H1f0	63	89	68.5	105	163	86.1667	59.5
H2-D1	474.5	704	777.5	980.5	795.5	462.167	279.5
H2-K1	178	185	258.5	309.5	184.5	284.667	329
H2-M3	11.5	8.5	4	9	14	10.1667	9.75
H2-Q2	5	8.5	16	20	9	0	0
H2-Q4	44	38	77.5	95.5	84	15.6667	24
H2-T23	13.5	3	10	8.5	18	15.5	10.25
H2-T24	29	5	16	10	17.5	0	0
Hace1	2	7	10.5	9.5	8	9.33333	9
Hacl1	15.5	11.5	5	11.5	8.5	6.33333	5.75
Hadh	26	42.5	11.5	16	16	23.3333	21
Hadha	69.5	120.5	37.5	69.5	75	42	52.75
Hadhb	89.5	141	29.5	33.5	55.5	91.8333	67.5
Hapln3	1.5	11.5	0	4	0	0.833333	0.25
Haus2	17	10	5.5	4.5	8.5	11.8333	10.25
Haus4	4	10.5	17	30	13.5	6	3.25
Haus6	2	4.5	4	9.5	2	3.83333	4.75
Hax1	51	96	33.5	73	68	102.667	70.25
Hbegf	23	24	17	22.5	35	157.167	163.25
Hdac3	6	12.5	16	17	8.5	32.6667	21.5
Hdac4	5	9	9.5	8	7.5	6.33333	6
Hdac5	39	25.5	17	27	32	12.1667	12.75
Hdac7	83.5	61.5	59.5	111.5	61.5	19.6667	19.75
Hdac8	6.5	15.5	4.5	9.5	13	4.16667	4
Hdlbp	59.5	106.5	47.5	66	64.5	51.1667	81.25
Heatr1	7.5	5.5	53.5	6	9	9.33333	9
Heatr5a	10.5	9.5	7	7	3	8.66667	14.75
Hectd1	25	33	10.5	17.5	13.5	31.3333	67.25
Hectd4	3	7.5	13	19.5	20	1.66667	3.75
Hecw2	0	9.5	24	46.5	26	1	1
Heg1	114	91.5	38.5	115	70	114.667	203.5
Helq	1.5	6	7.5	5	7	1.33333	1.5
Helz	37.5	12	13	14.5	10	5.5	5.75
Helz2	4.5	3	2.5	6	6	2.5	6.5
Heph	2	5.5	5	7.5	5.5	6.5	8
Herc1	23.5	19	26.5	21	14	6.66667	15.5
Herc6	2	6	2.5	9.5	8.5	3.33333	4.75
Hes1	24.5	26	34.5	63.5	79.5	48.5	49.5
Hexa	9.5	14.5	27.5	12	21.5	138.333	117
Hey1	32	18.5	3	44.5	17.5	12.1667	14.75
Hfe	3.5	4.5	7.5	7	7.5	13.8333	9.75
Hgf	0	0	12.5	7.5	0.5	0	0
Hgsnat	17	22	8.5	11.5	14	45.5	68
Hhex	12	17.5	19.5	27	28	18.5	11.25
Hibadh	21	22	21.5	32.5	22.5	38.1667	29.75
Hic1	6	11	7	2	3	15	12
Hid1	3.5	16	19	13.5	5.5	83.3333	51
Hikeshi	28	59.5	25.5	32	35	94.5	66
Hinfp	1.5	8	4	7.5	5.5	4.5	4.5
Hint3	6	9.5	1.5	4.5	11.5	48.3333	34.25
Hip1	72	62.5	28.5	73	56	20.1667	39.75
Hipk1	55	42.5	23.5	42.5	30.5	58.3333	101.5
Hipk3	39	22	9.5	20.5	15.5	43.8333	59.75
Hist1h1b	0	17	7	34.5	38.5	11	18.75
Hist1h1c	34	22	15	24	36	80.6667	102.75
Hist1h1e	4.5	8.5	8.5	16	16.5	48.3333	65
Hist1h2ad	0	7	1	7	12.5	26	16
Hist1h2ae	0	8	3.5	13	5	11.8333	6
Hist1h2af	0	0	0	0	7.5	5.16667	16.5
Hist1h2ag	0	3	1	6	6.5	16.5	28.5
Hist1h2ah	0	6.5	0	6.5	5.5	5.5	5.75
Hist1h2ak	0	0.5	0	7	3	8.83333	18.25
Hist1h2ap	4	44	29.5	78.5	41.5	256	54.25
Hist1h2bb	0	3	0	7	4.5	36	51
Hist1h2bl	0	5.5	0	13.5	41	6.66667	9.25
Hist1h3b	0	7.5	3	15	12.5	22	47.25
Hist1h4k	3	16	12	19.5	38.5	23.8333	31.5
Hist2h2aa1	19	33	18	26	24	165.5	142.5
Hist2h2bb	2	6	3	17.5	9	33	48.75
Hist3h2a	6	9.5	8	11.5	20.5	17	15
Hivep1	29.5	35.5	8	25.5	17	4.16667	11
Hivep2	7	6.5	8	8.5	5.5	2	5
Hivep3	2	0.5	15	3	3	0.333333	0.5
Hjurp	0.5	13.5	5	21	10	7.16667	8.25
Hk1	55.5	81.5	53	66	52	94.5	90.25
Hlx	7.5	6	13.5	32	22	26.8333	23
Hmbox1	41.5	38	58.5	71.5	46.5	4.66667	9.75
Hmbs	5	18	12.5	9	9.5	25.6667	14.75
Hmcn1	17	36	7.5	38	5.5	0	0.5
Hmg20b	16.5	53	23	42.5	49	16.3333	22.75
Hmga1	2	5	5	5.5	16.5	230.333	169
Hmga1b	16.5	114	4	76	61.5	111	18.75
Hmga2	0	0	2.5	0	6.5	36.1667	25.5
Hmgb2	3.5	31	21.5	74	57	8.16667	7.75
Hmgcl	7	18	14	21	18	43.1667	26.25
Hmgcs2	62.5	76.5	0.5	0.5	2	0.166667	0
Hmgxb4	20	18.5	14.5	29	11.5	4.16667	5.25
Hmmr	0	4	4	9.5	7.5	2.33333	3
Hmox1	6.5	13	10	4.5	8.5	207.167	257.5
Hmox2	15.5	22	31.5	23.5	34.5	46.1667	54
Hnrnpa1	67.5	199.5	76	235	293	84.6667	122.5
Hnrnpf	247.5	432	183.5	429.5	342.5	264	254.25
Hnrnpm	376	512	256	675	422.5	47.5	48.25
Hnrnpul1	47.5	60.5	39.5	75	54	22.8333	32.25
Homer3	4	35.5	14	48	32	27.5	28.75
Homez	4.5	7	1	2.5	1.5	2.16667	2
Hoxa3	0	0	5	9	3.5	0	0
Hoxa5	0	0	17.5	50	29.5	0	0
Hoxb3	0	0	6	4.5	8	0	0
Hoxb4	0	0	8.5	7.5	9	0	0
Hoxb5	0	0	8	6.5	9	0	0
Hpcal1	27	20.5	16.5	31	18.5	35.6667	28
Hpgd	0	0.5	71	355.5	8.5	0	0
Hprt	77	97.5	30	41.5	40	163.333	123
Hps4	1.5	6	4	4.5	16.5	7.16667	6.5
Hras	42.5	25.5	20	23	24.5	115.667	77.75
Hrct1	7.5	1.5	0	0	2.5	42.6667	42.5
Hs3st1	15	6	1	4	3.5	31.1667	15.75
Hs3st3b1	0	0	9.5	0	2	1.66667	2.5
Hs6st1	2.5	2.5	15.5	4	11	6	5.5
Hsd17b11	42.5	39.5	12.5	15.5	18	4.5	5.25
Hsd17b7	1.5	5.5	2.5	4	10	9.5	7.25
Hsd3b7	19.5	50.5	28	15.5	26	33.5	27
Hsdl1	5	9	3	13	1	26	17.5
Hspa12b	45	31	5	24	15.5	61.3333	71.25
Hspa13	3	10	6	6.5	5.5	17.3333	20
Hspb1	261	24.5	1.5	18	25.5	1619.83	1147.25
Hspb8	1.5	1	0	1	9	33	31.5
Hspg2	41	58.5	69	41.5	83	43	127
Htatip2	2	2.5	4	7	2	10.6667	9
Htra3	4.5	90.5	0	1.5	0.5	0.833333	0
Hus1	3.5	5	5	7.5	6	9	9.5
Hyal1	27.5	6	4	8	5	2.66667	4.25
Hyal2	20.5	19	25.5	37.5	28.5	43	38.75
Hyou1	23	34.5	14	31	30.5	27.6667	38.25
Iars	18.5	53	22	34	31.5	21.5	15.25
Iars2	13.5	13.5	9.5	7	12.5	15.6667	12.75
Ica1	12.5	32	34.5	57.5	25	14.3333	12.25
Icam1	20.5	24.5	29.5	44	31	76.1667	67
Icam2	61.5	58	39.5	126.5	86.5	195.167	136.25
Ice2	2	7	3.5	7.5	12.5	2.83333	3.25
Icmt	5	11	2.5	6	6.5	34	37.75
Id1	212.5	66	34.5	81.5	32	137	116.25
Id3	294	135	228	190	122.5	256	145.5
Id4	5	5.5	6.5	1.5	3.5	0.833333	0.25
Idh1	23	34	42	31	38.5	19.8333	20.5
Idnk	14.5	14.5	6.5	15.5	26	19.6667	12.75
Ier2	32.5	11.5	12.5	46	27	46.8333	42.75
Ier3	44	18	39	124.5	44	109	148
Ier5	14.5	10	9	18.5	19	42.1667	37.25
Ier5l	3.5	1.5	4	6	7.5	36.3333	23.5
Iffo2	12	6.5	4.5	10	9.5	14.1667	22
Ifi203	0.5	0.5	20.5	3.5	25	1.16667	1
Ifi35	19.5	8.5	6.5	14	26	34	23.75
Ifi44	5	8.5	7	8.5	73	1.16667	1.75
Ifi47	25.5	5.5	15	39	62.5	16.8333	16.5
Ifih1	16	6	8.5	12	7	5.16667	9
Ifit1	20.5	2	1.5	1.5	12.5	1.66667	2.25
Ifit2	1.5	1.5	8.5	6.5	19	1.33333	1.75
Ifit3	9.5	0.5	8.5	1.5	29.5	3.5	3.75
Ifitm2	75.5	21.5	268.5	104.5	113	382.833	212.5
Ifitm3	312.5	90	170.5	314	580.5	361.5	205
Ifnar1	105.5	97.5	27	36	62	71.1667	123.25
Ifnar2	61.5	50	23	19.5	29.5	95	85.25
Ifngr1	58	96	31.5	72	43	80.5	76.5
Ifngr2	3.5	8.5	6.5	8	7	54.5	48.5
Ifrd2	5	5.5	4.5	6.5	14	8.83333	6.75
Ift122	2.5	8.5	13	5	17.5	4.16667	4.25
Ift172	8	18	10.5	21	31.5	5.33333	8.25
Ift22	1	8	6	3.5	1	19.5	16.75
Ift27	9	7.5	15	9.5	7.5	26	8.5
Ift43	7.5	12	13.5	18.5	1.5	17.6667	10.25
Ift88	3	11	6	8.5	14.5	2.5	3.5
Igbp1	40	36.5	23	31	44.5	19.3333	22
Igf1	0	4	1	3.5	105.5	0.833333	0.5
Igf1r	140.5	76	7.5	22	12	19.1667	25.75
Igf2	5.5	22	20.5	89	190	0.666667	0
Igf2bp3	0	3	0.5	6	8	0	0
Igfbp3	17	9	1	0.5	176	788	694.75
Igfbp4	14.5	221.5	334	235	175.5	7.33333	16.75
Igfbp7	899	942.5	731	216	108	1821.17	1962.25
Igsf3	1	0.5	9.5	2.5	1.5	2	2
Igsf5	15.5	17	0	1	4	8.83333	7.5
Igtp	13	3	4.5	55	83	7.5	6.5
Iigp1	11.5	1	44	62	153	2.5	1.5
Ikbkb	22.5	38.5	27	29	24.5	25	22.75
Ikbkg	8.5	23.5	8	12.5	11	28.8333	39
Il10rb	79.5	26.5	21	16	25.5	31.8333	26.25
Il11ra1	22	88.5	19.5	9.5	18	38	29.25
Il13ra1	12	9.5	15.5	5	7	19.3333	27
Il15ra	8	3.5	2.5	8	4	5.16667	5
Il17rc	5	7	2.5	3	7.5	30	16
Il17rd	4.5	3.5	1	6.5	1	3	4.75
Il1a	0	0	58.5	0	0	0	0
Il1r1	12	9.5	10.5	3.5	1	10.6667	16.75
Il27ra	0.5	2.5	5.5	1	2	3.16667	2.25
Il2rg	45.5	118.5	47.5	59.5	64.5	83.1667	58
Il33	0.5	0.5	16	7	17.5	0	0
Il4ra	7	10.5	20	37	13	27.3333	25.5
Il6st	82	72.5	250	76.5	59.5	81.5	87.75
Ildr2	9	40.5	0.5	2	0.5	7.5	12
Impa2	5	18	12	20	17.5	1.16667	1
Impad1	8	21.5	9	13	14.5	42.1667	54.25
Impdh1	108.5	53	19	50	22	37	24.75
Inafm2	2.5	5.5	4	7	2	20.6667	14.25
Incenp	4.5	29	23	87.5	29.5	4.33333	3
Inf2	23.5	13	4	12.5	5	6.83333	13
Ing1	35	46.5	24.5	50.5	41.5	14.1667	11.75
Inhbb	0	2	6	1	5	4.5	8.75
Inip	6	8.5	6	10.5	3.5	10	8.25
Inka1	7.5	12	12.5	23.5	43.5	15.3333	13.5
Ino80d	12.5	9.5	11.5	15.5	11.5	3.33333	4.5
Ino80e	9.5	14.5	15.5	12.5	24	25.5	19.25
Inpp1	9.5	39	7	6	8	13.1667	10.75
Inpp4b	2	4	4.5	2	28	0.166667	0.5
Inpp5b	27.5	43.5	23.5	26	17.5	7.83333	7.5
Inpp5d	13	20	19.5	33	18.5	24	25.25
Inpp5f	38	37	12.5	14.5	20.5	5.66667	6.25
Inpp5k	15	32	16.5	17.5	11.5	28.8333	25.25
Inppl1	15	37	49.5	55	37.5	11.8333	14.75
Insig2	80	110	59	33.5	29.5	20.8333	17
Insr	29	34	11	9	6	16.8333	30.25
Ints1	16.5	24	10.5	18.5	15.5	9.33333	13.75
Ints12	2.5	7	1.5	5	6	5.66667	6.5
Ints14	2.5	14.5	8.5	14.5	6.5	19.1667	16
Ints2	11	16.5	7.5	14.5	23.5	9	9
Ints3	16	30.5	15	51.5	32	9.16667	11.5
Ints7	3.5	11.5	4.5	17	9	7.5	6.75
Ints8	10	22	14.5	21.5	9	17.1667	16.25
Invs	2	4.5	4	6.5	4	3.66667	4.75
Ipmk	7.5	5.5	4.5	5	4.5	17.8333	20.5
Ipo11	23	35	20.5	30.5	53	28.5	25.25
Ipo13	3.5	4.5	3.5	7.5	6.5	13.8333	5.75
Ipo9	59.5	119	66	123	96.5	34.5	33.5
Iqce	8.5	15	15.5	15.5	7.5	2.66667	4
Iqcg	17	17.5	13.5	11.5	15	3	5
Iqgap1	77	96	28	92.5	69	37.3333	69
Iqsec1	29.5	64	62	45	39.5	5.66667	9.25
Irak1	48.5	69	21.5	45	17.5	23.5	18.25
Irak2	9	7.5	5	4.5	6.5	30	26.5
Ireb2	9.5	41	24	19.5	20	7	8.75
Irf1	59	15	73.5	137.5	136	17.5	19.75
Irf2	83	95	67	92.5	52.5	9.66667	8
Irf2bp1	4	1.5	3	5.5	2.5	15.6667	8
Irf2bp2	11	10.5	6.5	7.5	9.5	20.5	20.5
Irf3	50.5	56	25	32	12.5	37.1667	30.25
Irf7	16.5	7.5	12.5	9	49.5	2.16667	2
Irf9	8.5	5	5.5	11	20.5	9	8.25
Irgm1	13	9	25	54.5	71.5	15.8333	14.75
Irgm2	7.5	3.5	4	20	17	4.66667	4.5
Irx3	1	0	0	0	37	1.5	1.5
Irx5	0	0.5	0	0.5	7	0.166667	0.5
Isg15	26.5	5	7.5	9.5	35.5	4.66667	4.75
Ism1	9	5	0	1.5	0	7.66667	13.25
Isyna1	155.5	306	5	24	74.5	7.33333	4.5
Itch	23.5	30	20.5	20.5	14	23.3333	28.75
Itga1	39	23	5.5	14.5	7.5	25.8333	41
Itga2	0	3	2	30	3	2.16667	3
Itga3	32	5	0	38	33	162.167	190.25
Itga4	8.5	49.5	0.5	6.5	0	14.6667	16.25
Itga5	3.5	20.5	16	30.5	18	237.833	123.75
Itga6	156.5	57.5	50.5	112.5	143	152.833	263
Itga8	4.5	3	63.5	7	36.5	13	19.75
Itga9	0	3	60	7	25	6.16667	6.5
Itgb1	175	286	94	316.5	264	896.167	1066.5
Itih5	62.5	3	0	0.5	0	1.83333	8.5
Itm2a	1785.5	659.5	1	9	9.5	134	101.75
Itm2b	455.5	433.5	448	445.5	341	541.667	479.25
Itm2c	143.5	115.5	56	67.5	59	350.667	196.5
Itpa	11	36	22	31	22.5	20.6667	17
Itpk1	1.5	3	2.5	3	12.5	4.33333	3.5
Itpkb	21	22	18.5	27	28.5	7.33333	18.75
Itpr3	35.5	11	4	24	24	10	22.25
Itprid2	32.5	18.5	18.5	11	22.5	16.5	34.25
Itpripl1	3.5	5	1	7.5	3	10	14.5
Itpripl2	13	5.5	3.5	15	7.5	67.8333	115.25
Itsn1	17	32	160	29.5	54	6	7.75
Itsn2	54.5	82.5	46	86	80	43.6667	68.5
Ivd	5	4.5	14	31.5	13.5	13	6.75
Ivns1abp	42	35.5	39	42	43	24.8333	23.5
Jade3	1.5	3	6	5.5	4.5	2.16667	2
Jag1	18	19	7	13	15	34	43
Jag2	91	46.5	1	61.5	33.5	24	34.75
Jak1	38	36	189	76	64.5	42.1667	52.5
Jak2	26	45	19.5	13.5	14	20	26.25
Jak3	6.5	16	20	9.5	8	7.16667	5.5
Jam2	136.5	99	62.5	32.5	37.5	15.5	16.5
Jam3	3.5	4	2.5	5.5	32.5	10.5	9.25
Jarid2	39.5	33	41	37.5	65	2.66667	3.25
Jcad	241	113.5	15.5	56.5	28.5	88.5	148
Jdp2	6	4.5	2.5	8.5	2.5	20.1667	13
Jmjd6	5.5	8	8.5	12	11.5	26.3333	20.5
Jmy	12	25	5.5	11	12.5	4.66667	5
Josd2	7	9	6.5	10	10.5	30.6667	20.25
Jpt1	7.5	47.5	49.5	141.5	64.5	97	59.25
Jpt2	11.5	23	8.5	20.5	18.5	30.1667	23
Junb	50.5	22.5	47	75	66.5	98.6667	84
Jup	64	68.5	20	192	65	100.167	99.75
Kalrn	6	19.5	7.5	14.5	6	6.83333	15.25
Kank2	8.5	6.5	3.5	6.5	8	10.1667	17.5
Kank3	124.5	160.5	29	96.5	104.5	83.8333	78
Kank4	6	9	1	1.5	4.5	3.33333	18.25
Kat2a	7.5	6.5	3.5	5	5	8.5	6
Kat6a	16.5	39	8.5	27	27.5	3.66667	6
Kat6b	10	15	9.5	14.5	10	2.5	3.75
Katna1	16	22	16.5	23	23.5	14.3333	11.75
Kazn	6	12	7.5	18	4.5	1	1.25
Kbtbd11	67	131.5	0	0	4.5	1.16667	3.75
Kcna6	0.5	8	0	0	1	0	0
Kcne3	0.5	3.5	14	1	25	12	12
Kcnj2	10	42	3	1	2.5	7.66667	14.5
Kcnk6	1	0.5	5	2	0.5	1	2.25
Kcnq1	20.5	36	16.5	41.5	4.5	40.1667	35.25
Kcp	9	84.5	0	0.5	1.5	0.333333	0
Kctd10	60	65.5	32	80	45.5	239.333	169
Kctd12	24.5	12.5	6.5	16.5	31.5	3.33333	5
Kctd12b	24.5	35	12.5	15.5	41.5	20.8333	33.25
Kctd17	50.5	193	40.5	33.5	104	81.1667	63.25
Kctd20	28.5	41	23	43	21	47.1667	39.25
Kdelc1	12	8	2.5	5.5	9	9.5	8.5
Kdelc2	9	14	7.5	7.5	6	12	11.25
Kdelr1	55.5	119.5	37	35.5	34.5	67.5	66
Kdelr2	16	24.5	26.5	32.5	16.5	123.5	95
Kdm2a	58	79	40.5	63.5	80	16	23
Kdm2b	26.5	9	6	11.5	18	4.33333	6
Kdm4c	8	20	8.5	8	8	8.16667	9.5
Kdm5c	16	25	20	28.5	15	16	18.5
Kdm5d	12.5	19	8	8.5	11.5	2.83333	5
Kdm6a	28	30	12.5	30	36.5	17.3333	21.75
Kdm6b	6.5	9.5	13.5	21	21.5	1	1.25
Kdr	174	280	153.5	125.5	101	36.3333	49.5
Kdsr	27.5	12.5	4.5	8.5	8	17.1667	21.5
Khdrbs3	3	6.5	71	1.5	32	16.8333	18.25
Khnyn	6.5	8	2.5	5.5	2.5	9.16667	10.25
Khsrp	40	45.5	29	49.5	44	15.3333	15.75
Kif11	0	4.5	2.5	10.5	5.5	2	2.75
Kif13a	12.5	10.5	9	80.5	26	5.83333	11
Kif13b	35.5	21.5	14.5	26.5	18	4	8.75
Kif14	0	30.5	2.5	17.5	1.5	0.166667	0.5
Kif15	0	11	5.5	36	17	0.5	1
Kif18b	0	1	5	5	2	2.16667	2
Kif1b	43	54	23.5	50.5	38	16.5	27.75
Kif1c	44.5	43	13.5	27	19	51.6667	120.5
Kif20a	0	4.5	4	17	7	4	4.5
Kif20b	2	10.5	12	24.5	12	0.666667	2.25
Kif22	0.5	10.5	7	25.5	17	4.33333	2.5
Kif23	5.5	48	23	135.5	84	4.33333	6
Kif26a	73.5	56.5	18.5	106	31.5	16.5	25
Kif2a	17.5	94.5	27.5	59	60.5	8.83333	16.75
Kif3a	30	50.5	24.5	21.5	21	11.5	15.25
Kif4	0	8.5	3.5	17.5	7.5	1.33333	2.25
Kif5b	130	128.5	60	106	97.5	98.1667	139.75
Kifc3	98.5	88	60	87.5	81	14	13.25
Kifc5b	2.5	3.5	2	7	3	0.166667	0.5
Kit	2.5	46	39.5	241	24.5	67.3333	38.25
Kitl	100	61	1.5	56.5	40	101	170.5
Kiz	14.5	13.5	8.5	9.5	10	5.16667	6.75
Klc2	2	18.5	6	15	12	6.83333	8.75
Klf10	9	11.5	15.5	16	41	27.6667	19
Klf11	17	10.5	6.5	8.5	10	4.83333	4.75
Klf13	21.5	20	6.5	15	11.5	57.6667	30.5
Klf2	84.5	19	22.5	43.5	66.5	43.1667	42.75
[truncated: 2,558 more rows]

## Sheet: F) Pan-endothelial cell genes
Gene	adult_brain_ECs_TPM	p7_brain_ECs_TPM	p7_liver_ECs_TPM	p7_lung_ECs_TPM	p7_kidney_ECs_TPM	control_cultured_ECs_TPM	bcat_cultured_ECs_TPM
4931406P16Rik	141.5	184	43.5	170.5	72	93.6667	139.5
Adam15	112	48.5	29	94	92.5	136.833	150.75
Adgrf5	512	266.5	179	267	217.5	267.167	515.5
Adgrl2	90.5	127.5	88	252.5	81	26.8333	37.75
Afap1l1	64	54	17	60	29	51.6667	70.75
Amot	63	33.5	13.5	15.5	17.5	4	8.25
Apbb2	194.5	206.5	110	116.5	190	53.5	57.75
Arap3	59	129	86.5	154.5	124.5	33.5	52.75
Arhgap27	9.5	35	8	31	18	12.3333	13.5
Arhgap29	212.5	182.5	97	171.5	144.5	245.833	402.25
Arhgap31	52	31	35.5	41.5	31	28.1667	60.5
Arhgef15	22.5	30	42	51.5	26.5	13.8333	18.25
BC028528	58	109.5	23	134.5	40.5	44.3333	42
Bcl6b	17.5	49.5	29.5	50.5	73	94.6667	143.5
Caskin2	22	27	16	56	46	11.8333	13.5
Casp7	21	33	23.5	35.5	39	21	29.75
Casp8	37.5	55.5	42	70	33.5	48	45.75
Cavin2	42	22.5	72.5	208.5	20.5	56.8333	59.25
Ccm2l	30.5	20.5	10	23	14.5	17.5	23
Cd34	363	405	22.5	311.5	312.5	315.167	423.75
Cd93	73.5	196	34.5	226	140	376.833	548.5
Cdc42bpb	20	74	36	75	80	20.1667	41.5
Cdh5	144.5	142.5	107.5	357	172.5	225.167	520.25
Cds2	48	43.5	24	26	31	62.5	65.25
Cenpb	26	31.5	16.5	32.5	27	56.3333	77
Cep68	12.5	22	9	13	12.5	11.1667	11.25
Clec14a	17	12.5	28	66	17.5	209.667	146.25
Clic1	42	80	66.5	75.5	89	324	257
Cmtm6	47	63	51	43.5	43	87.3333	56.75
Cracr2b	26	41	54.5	85	39.5	83.6667	82.5
Crip2	76.5	80.5	27	99.5	57.5	416.833	216.5
Dab2ip	22.5	17.5	10	16	20	25.3333	37
Dll4	32	33.5	16.5	52	29.5	73.3333	80.75
Dnm2	117.5	121	70.5	96.5	91.5	54	41.25
Dock1	33	46	41.5	42	46	20.8333	29.25
Dock6	67.5	109	82.5	109	87	8.66667	11.25
Ece1	105.5	139	102	220.5	112	150.167	247.25
Ecscr	9	76.5	20.5	101	60	254.5	202.25
Edn1	34.5	21.5	19.5	39	13.5	449	490.75
Efna1	11.5	14.5	11	31	40.5	44.1667	46.5
Egfl7	320.5	664.5	579.5	1146.5	941.5	583.333	561.25
Elk3	103.5	200.5	269.5	390	217	37.1667	39.5
Eng	271.5	275	195	204	194	270.5	363.75
Epas1	835	497	224.5	880	169	81.1667	136.5
Ephb4	14.5	14	19	29.5	23	22.1667	17
Erg	123	127.5	77.5	102	138	59.5	154
Ets1	273	314.5	195.5	282	214	84.6667	118.25
F11r	72	85.5	45	81	77.5	138.833	118.75
Fam43a	22.5	53	29.5	22.5	33.5	141.833	74
Fat4	8	10	8	13	11	6.83333	9.25
Fgd5	25.5	40.5	29.5	48.5	48	16.8333	33
Fli1	37	94.5	35.5	58.5	42.5	45	52.25
Fmnl3	88	82.5	27.5	61	77	16.5	17
Foxo1	10	11	7.5	9.5	6.5	14.5	13.25
Gatad2a	97	97	60	105.5	81	48.8333	41
Gimap1	68	45.5	35.5	69.5	54.5	39.1667	31.5
Gimap4	35	85	230	306	606	5.16667	6.5
Gimap5	10.5	16	18.5	43.5	83	20.5	20.5
Gimap6	52	61	140	115.5	288.5	69	77.75
Gimap8	20.5	22.5	28	44	45.5	16.3333	22.5
Gimap9	54.5	26	28	42.5	40.5	7	8.25
Gne	58	37.5	19	30	40.5	46.6667	30.75
Grasp	43.5	19	15.5	32	19.5	16.6667	17.75
Hdac7	83.5	61.5	59.5	111.5	61.5	19.6667	19.75
Heg1	114	91.5	38.5	115	70	114.667	203.5
Hip1	72	62.5	28.5	73	56	20.1667	39.75
Icam2	61.5	58	39.5	126.5	86.5	195.167	136.25
Il2rg	45.5	118.5	47.5	59.5	64.5	83.1667	58
Itga6	156.5	57.5	50.5	112.5	143	152.833	263
Itpkb	21	22	18.5	27	28.5	7.33333	18.75
Jam2	136.5	99	62.5	32.5	37.5	15.5	16.5
Kank3	124.5	160.5	29	96.5	104.5	83.8333	78
Kctd12b	24.5	35	12.5	15.5	41.5	20.8333	33.25
Kdr	174	280	153.5	125.5	101	36.3333	49.5
Klhl4	11.5	13.5	5.5	5	14	35.5	32.5
Klhl5	97	65	24.5	107	20	48	45.5
Leprot	73	73.5	53	59	67	82.3333	74.25
Lgals9	72.5	93	48.5	92.5	119.5	94.3333	48
Lrp5	22	15.5	22.5	16	22	13	27.5
Lrrc8c	75	16	24.5	54	34.5	81.5	63.75
Map3k11	15.5	30	11.5	48.5	21.5	43.5	34.75
Mapk12	13	23.5	39.5	28	30.5	15	14.25
Mapk3	118	95.5	58	149	70	67.8333	56.5
Mgll	18	13	14.5	16.5	9	22.3333	23
Mlkl	6.5	17	41	27	29.5	16	17
Mmrn2	71.5	40	43.5	20	58	99.5	214.25
Msn	99.5	140.5	82.5	218.5	205	671.333	523
Nck1	114.5	77.5	61.5	72.5	73	46.6667	56.5
Notch4	34	72.5	32	137.5	85.5	54	96.25
Nrp1	88	83	67	96	63.5	18.3333	29.75
Numb	36.5	41	42.5	86	50	20.1667	22.25
Oasl2	69.5	16	18.5	54	76.5	1.83333	2.75
Pcdh12	17.5	92.5	59.5	71.5	44	5.16667	10.5
Pecam1	362	375.5	203	668	363	519.667	872
Piezo1	51.5	132.5	51	130	87	54.1667	83.75
Pitpna	127	204	129	134	104.5	193.833	172
Pkn1	28.5	35.5	29.5	48	36.5	28.8333	30.5
Plcg1	64.5	73	48.5	67.5	44.5	37.3333	54.75
Plekhg5	20	61.5	8.5	19.5	48	24.5	27.5
Plk2	112	129.5	202	305.5	518.5	147.5	174.5
Podxl	264.5	134.5	36.5	175.5	197	35.5	66.75
Ppm1f	24	37.5	9.5	40	21.5	53.5	80.75
Prkch	35	21	19.5	27	28.5	55.6667	55.25
Ralb	23	48	54.5	52.5	42	110.833	93.5
Ramp2	289.5	374.5	129	372.5	171	131.833	99
Rapgef3	63	95	77.5	112	95.5	26	34
Rapgef5	39.5	80	76	106	77.5	45.5	58.75
Rasgrp3	174.5	251.5	114.5	227.5	209	47.1667	72.5
Rasip1	17	34	24.5	50	31	210.167	120.75
Rassf1	10.5	22.5	11.5	40.5	33	72	53.25
Ripor1	39	42	12	31	22	18.5	6
Rnf114	53.5	39	23	51.5	57	43.5	28.25
Robo4	63	51	25	27	53	185.333	154.75
Rtl8a	119	75	10	102.5	32.5	68.6667	82.5
Rtp4	34	11	20	29	62.5	6.16667	6.25
Scarb1	47	70.5	24	30.5	33.5	51.3333	43.25
Sec14l1	18	17.5	14	19.5	17.5	58.6667	67.5
Sema6a	59.5	131	78	69.5	68.5	7.16667	3.5
Sh2b3	14.5	13.5	12.5	16	24	22	20.5
Sh3tc1	11	14	34	38	11	29.1667	28
She	32.5	19.5	13.5	26.5	24.5	26.5	23
Slc39a1	55.5	60	53	34.5	47.5	48	107.75
Slc9a3r2	231	160	46.5	221	254	124	89.75
Smad7	15.5	12.5	13.5	32.5	10	17.6667	14
Smagp	22.5	16	44	41	41.5	21.1667	6.75
Sorbs3	19.5	11.5	16.5	18.5	15.5	36.5	18.5
Sox17	70	28	15	102	71.5	212.333	76.75
Sox18	51	14.5	16	29	11.5	230.5	150.25
Sox7	22	37	13.5	59.5	22.5	34.3333	22
Stap2	18.5	49.5	21	25	20.5	22.5	21.5
Tecpr1	14.5	29.5	8	17	10.5	15.5	21.75
Tek	168	152	102.5	223	186.5	26.6667	31.75
Tgfb1	35	60.5	96.5	119	58	39	25.75
Tie1	24	47	22.5	60.5	46.5	125.833	158
Tjp1	387.5	385	125.5	315	154.5	48	131
Tlnrd1	6.5	7	7.5	16.5	11.5	12.1667	12.5
Tmem44	62	33.5	7.5	17	23	9.16667	8.25
Tmem88	7	11.5	20.5	17	30.5	91	83.5
Tnfaip1	31.5	57.5	38.5	31	25	121.833	116.5
Tnfrsf22	7.5	11.5	16.5	22.5	36	15.1667	9.25
Tnfsf10	25.5	14	11	44	33	1	0.75
Tpst2	50.5	81.5	78.5	79	83	68	35.75
Tspan14	36	61.5	46.5	54.5	72.5	76.3333	59.25
Tspan18	11	105	44.5	102	63.5	6.66667	3
Tspan9	37	67	34.5	91	122.5	136.333	152.25
Uaca	93.5	88.5	39	59.5	88	18.6667	60.5
Unc45b	8.5	21	14.5	14.5	7.5	5.66667	1.75
Ushbp1	27.5	55.5	64	70	59.5	16.1667	14.5
Vash1	18.5	49	16.5	23	29.5	14	61.75
Vat1	103.5	89.5	34	95.5	32	105	217.75
Vgll4	17	12.5	13	32.5	24	19.1667	19
Vsig2	37.5	44.5	8	22.5	13.5	119	55.75
Yes1	25	42	36	52.5	64	19	20.5
Zbtb46	16	8.5	14	11.5	13	6.66667	7.75

## Sheet: G) Tissue-specific EC genes
Gene	adult_brain_ECs_TPM	p7_brain_ECs_TPM	p7_liver_ECs_TPM	p7_lung_ECs_TPM	p7_kidney_ECs_TPM	control_cultured_ECs_TPM	bcat_cultured_ECs_TPM
1700029I15Rik	0.5	0.5	4.5	0	1	0.5	0
4930453N24Rik	7	7	6.5	7.5	24	23.5	25.75
8030462N17Rik	10.5	12.5	3.5	5	5	13.3333	15.5
A530084C06Rik	2	5.5	0	0	0	0	0.5
A930033H14Rik	6	8	0	0	1.5	0.333333	0.5
Aass	0	0.5	1.5	0	0	0	0
Abca1	10.5	68	12	6	15.5	6.5	12
Abcb1a	1188.5	510	0.5	28.5	0	41.5	92
Abcb1b	0.5	1	0	4	0	48.1667	72.75
Abcc3	0	0	1.5	2	6	3.66667	3
Abcc4	46.5	17.5	2	1.5	3.5	28.1667	20.75
Abcc6	4.5	11.5	0	0	0	0.166667	0.5
Abcc9	11.5	1	23	0	3	0	0
Abcg2	281	189.5	23	50	84.5	265	237.25
Abhd2	114.5	83.5	2	15.5	3.5	38.3333	95.5
Abhd6	11.5	19.5	5.5	3.5	4	12	6
Ablim1	320	215	2.5	122.5	21	48.1667	73.5
Acacb	9.5	6	2.5	4.5	1	0.666667	1.25
Ace	6.5	4.5	1.5	239	5.5	50.8333	97
Ackr1	35	2	16	0	0	4.66667	3.5
Acnat1	2.5	11.5	0	0	1	0	0
Acox1	40.5	66.5	19	19.5	21.5	45	54.75
Acss3	2.5	5	0	0.5	1	0	0
Acvr1b	0	1	1	5	1.5	3	3.5
Acvr2b	5.5	3.5	0.5	2.5	8.5	1.16667	0.5
Acvrl1	170.5	56	6	283	88.5	338.667	289.75
Ada	0.5	0.5	3.5	3	16	3.16667	1.5
Adam17	76	64	29.5	50	30	20.6667	25.75
Adam23	1.5	12.5	237.5	19.5	0	0.166667	0
Adamts18	0	0.5	0	1	0	0	0
Adamts8	0	2.5	0	1	0	0	0
Adamtsl1	1.5	0.5	1.5	0	12.5	0	0
Adamtsl2	12	63	0	10.5	1.5	0	0
Adarb1	3	5	13	1.5	5.5	7.83333	12
Adck2	2.5	1	2.5	3.5	16.5	5.33333	3.75
Adgre5	201.5	182	76	486	167	14.8333	15.75
Adgrg3	1.5	4	35	5	11.5	3.33333	2
Adgrl1	2.5	17.5	5	35	6	0.833333	1
Adgrl4	1282.5	844.5	308	216	227	1035.83	1012.5
Adh6b	0	0	4	0	0.5	0	0
Adrb1	0	2	1.5	32.5	0.5	0	0
Aff3	0.5	1.5	0	32	0	5.33333	4.25
Agfg2	1	2	12	4	1	9.66667	9
Ago3	4.5	3	18	3.5	1	6	4.75
Ago4	0.5	2	1.5	3	7.5	0.166667	0.5
Agpat5	3.5	5	11.5	4	3	74.3333	63.25
Ahnak	120.5	28	17	66.5	42.5	184	348
AI467606	15	2.5	0	1	1	7.83333	5.25
Akap2	108	101	47.5	66.5	58	87	137.75
Akr1b8	0	0	40.5	3.5	0	8.16667	6
Akr1c14	102.5	25.5	0	3	4	45	52.75
Alas1	104	94.5	11.5	31	12.5	127	136
Aldh1a1	81.5	3	0.5	4.5	0	8.16667	17.75
Aldh2	345	55	91	185	20	75	146.5
Aldh9a1	34.5	45	12	15	12.5	11	7.75
Alpk1	1	3.5	9.5	0	4.5	1.33333	1.5
Alpl	54	1.5	0	2	5	0.333333	1.5
Angptl4	11.5	56	5	5	6.5	300.5	386
Ankrd33b	1.5	4	3	15	5	4	3.5
Antxr2	2	4	5.5	111.5	8.5	10.3333	11.5
Ap1b1	18	62	150.5	52	42.5	24.8333	18.25
Ap1s2	41	47.5	12	29	21.5	42.1667	45.5
Apcdd1	415.5	842	0	17	1.5	24.6667	43.75
Aplf	1.5	2	1.5	5	1.5	1.83333	1.5
Apln	9	165.5	2	9	12.5	1332	1399.75
Apmap	42	44.5	8.5	20.5	16	19.8333	20.25
Apod	104	237	0	0	0	31.8333	22.75
Apoe	360	277.5	1132.5	6	76.5	344.333	184.25
Appl2	29.5	51.5	111.5	35	20	5.5	6
Aqp1	0	0	194.5	139	22	1.16667	1.75
Arhgap23	8.5	13	33	15.5	11.5	14.1667	16.5
Arl4a	149	108.5	23.5	9.5	13	20.3333	15.25
Arl6ip5	104	95	28.5	37	53.5	103.5	131.25
Armcx3	7	14	20.5	15.5	9.5	28.1667	26
Armt1	1.5	10.5	2	4	1.5	4.5	4.25
Asap3	1.5	3.5	0	0	0.5	0.833333	1
Asb7	2	2.5	6	2	1.5	3.83333	4.75
Aspg	0	2.5	1	6.5	0.5	0	0
Atl2	11	48	6	10.5	8.5	13	11.5
Atp10a	38	3	0	1	0.5	9.83333	16.25
Atp11c	16.5	14.5	7.5	8.5	8	7.66667	14.75
Atp13a2	25	11.5	2	23.5	6	13.5	10.75
Atp2a3	4	1.5	0	10	1.5	1	1.25
AU021092	48	102	4	3	21.5	129.5	102.75
AU022252	5.5	20	0.5	4.5	2.5	13.1667	9.25
Axin2	49.5	26.5	5.5	9.5	9.5	0	1.5
B3gnt3	0	0	3	0.5	0	58.3333	47.25
Bace2	1.5	9	175.5	31	3	13.3333	8.75
BC051142	1	1	17	0	0.5	0	0
Bcam	105	15.5	13	36.5	38	117	115
Bche	29	10	0.5	1	0	2.66667	2.5
Bcl2l1	53.5	23	17	32.5	25.5	151.333	139.5
Bcl9l	10.5	10	6.5	23	9	1.83333	1.75
Bdkrb2	0	0	0	1	0	0.666667	1
Best1	0	8.5	0	0	0	0.833333	0.5
Bhlhe40	77	25	27	19.5	45	32.6667	42
Bmp2	0	1	34.5	0.5	3	47.8333	21.75
Bmp6	0.5	2	3	82	0	36.6667	35
Bnip3	14.5	4	10	1.5	3	97.3333	66.25
Bnip3l	415.5	411.5	132.5	175	176	132.333	94
Borcs5	0.5	1	0.5	2.5	7	6.66667	4.75
Braf	17	10	6	8.5	10.5	7	9.25
Brd7	59	120	29	45.5	42	10.5	14
Brf2	6	4.5	1.5	3.5	11	8.66667	6.25
Bsg	2669	1847	44	62.5	54	669.667	479.25
Bspry	0	1.5	0	0	0	0	0
Btbd18	0	0	1	0	0.5	0	0
Btg1	4	16	9.5	22.5	70.5	34.6667	34
C130074G19Rik	154.5	146	11	67.5	42	26	94.25
C1qtnf1	8	3	205.5	12.5	3	2	3
C1qtnf6	1.5	14.5	35.5	5	11	7	7.25
C1rb	2	0	4.5	0.5	0.5	0	0
C5ar2	0	0	2	0	0	0	0
Cacna1a	2	15	28.5	0.5	4	1	2.5
Cacng3	0	0	10	0	0	0	0
Cadps2	1	3	2.5	19	3.5	2.33333	2.25
Calcrl	51	23	118.5	536	101.5	41.6667	37.5
Calm2	276	492	685.5	405	363.5	569.833	399.5
Camk4	0.5	3.5	0.5	12	2.5	0	0
Capn15	11	6.5	1.5	3.5	2.5	2.83333	2.25
Capn3	0	0.5	2	0	0	0	0
Capn5	0.5	0.5	3	8	2.5	2.66667	2.75
Car4	1175.5	633	0	46.5	1	0.333333	0
Car5a	4	4	0	0	0	0	0
Cars2	2.5	6	8.5	5	5	9	5.5
Casp4	4.5	6	44.5	7.5	12	11.6667	8.5
Casp9	6	4	1.5	3	9.5	8.33333	7
Casz1	20.5	1.5	3	58	6.5	0	0.5
Cat	31	78.5	12	27.5	22.5	37.8333	29.75
Cav1	170.5	123	9	581.5	59.5	2554.83	2154.25
Cav2	94.5	33.5	18	60.5	24.5	546.333	425.75
Cavin1	146	68.5	29	177.5	49	393.833	441.25
Cavin3	22	10.5	1	11.5	51	254.5	123.75
Cbx8	0.5	2.5	1	5.5	1.5	2.16667	1.75
Ccdc141	269	262	0.5	3.5	3.5	10	17.25
Ccdc152	18.5	1	3.5	0.5	0	3.16667	0
Ccdc186	50	29	23.5	30.5	31	5.5	10.5
Ccdc194	0	1.5	5.5	0.5	1	0.666667	0.5
Ccdc3	4	1.5	0.5	0.5	50	0.333333	0
Ccdc85b	9.5	10	2.5	5.5	4	15.6667	12.5
Ccdc9b	1	1.5	5.5	3	1	6	8.5
Ccl21a	138.5	127	0	3	0.5	0	0
Cd2ap	93.5	57	23	44.5	29	21	43.5
Cd300lg	5.5	1	55.5	2.5	7.5	0.166667	0
Cd320	20	35.5	0.5	4	2.5	22	17.5
Cd55	1.5	13.5	152	5	9.5	5.5	4
Cd55b	0	0	2.5	0	0	0	0
Cd59a	128	36	81	7.5	25.5	24.3333	20.5
Cd82	48	161	16	9	9.5	69.1667	78.25
Cdiptos	2.5	0	1.5	0.5	0.5	0.666667	1
Cdkn2b	18	17.5	0.5	1	0	25.8333	27.75
Cdon	67	3.5	0	1	2.5	0.5	1
Ceacam1	64	21.5	9.5	26.5	21.5	3.5	5
Celsr1	0	0	0	0	3	0	0
Celsr2	0.5	3.5	1	12.5	4.5	0	0
Cep55	0	11	5	25	10	2.83333	3.25
Ces2b	0.5	3.5	0	1	0.5	1.33333	1
Ces2e	1.5	1	1.5	2.5	12	0.666667	0.5
Cfap69	0	1	6	1.5	0	0	0
Cfh	60.5	5.5	8	1	1	43.8333	51.75
Cgnl1	83	91.5	9	34.5	26.5	33	105
Chaf1a	1	13	10.5	33	14	2.16667	2
Chmp3	245	165	78	138	114	72.3333	73.25
Chmp5	108	54.5	37.5	41	50	78.3333	68.75
Chrm3	0	0.5	0	1	9.5	0.166667	0
Chst1	1.5	26	1	1	4.5	43.1667	23
Chst11	8.5	10.5	0	5.5	3	4.33333	11.5
Chst15	3.5	7	29	7	7	6.33333	4.5
Chst8	0	0.5	0	0	3	0	0
Chst9	0	1.5	0	0	0	0	0
Clcf1	0	0	0	3	1	5.5	4.75
Cldn15	0.5	0	0.5	1	35.5	0	0
Cldn5	733.5	562.5	36.5	179	65	453.5	469.25
Clec1a	5.5	20.5	10.5	136.5	30	12.5	15
Clec1b	2.5	0.5	29.5	0.5	0	0.666667	0
Clec2d	111.5	26.5	39	59	53	9.33333	20
Clec4g	0	0	470.5	0	0	0	0
Clic4	80	53	23.5	51	52.5	404.333	412.5
Clta	70.5	100.5	150.5	77	78	185.167	186
Cngb1	1	2.5	0	0.5	0.5	0	0.25
Cnksr3	2.5	7	16.5	6	6	16.8333	21.5
Cnr2	0	0	6	0.5	2	0	0
Cnrip1	1	1.5	22.5	4.5	13.5	4	3
Cobll1	131	92.5	1	12	28	12	12.75
Col13a1	0.5	3.5	57	6	11.5	0.166667	0.25
Col17a1	0	0	8	0	0	0	0
Col27a1	1	1	4	2	1	0	0.5
Col4a3bp	111.5	17.5	19	15.5	14.5	20.8333	35.5
Cpne2	7	8	31	6	6	23.8333	20.5
Cpt2	22.5	17	2.5	9	10.5	14.3333	11
Cr1l	78	87.5	22	42.5	32.5	159	167.5
Creb3l1	0	4	9.5	4	3.5	3.16667	0.75
Crispld1	13	3.5	0.5	5.5	4	3	3
Crlf2	4	13	18	11	12	63.3333	66.75
Csf2rb2	1.5	0	7.5	0	1.5	0.333333	1
Csmd1	0	0	1	0	0	0	0
Ctdspl	12	6.5	17.5	5.5	3	8.5	5
Cthrc1	27	40	1	11.5	4	9.33333	4.75
Ctif	2.5	3.5	1	3	7	3.66667	7.75
Ctla2a	393	367.5	68	246.5	157	3789.83	3025.25
Ctnnal1	3.5	2.5	30	6.5	1	0.666667	0.5
Ctnnbip1	23.5	62	3.5	13	24.5	42.5	31.75
Ctsh	123	196	4	15	33	101.167	110
Ctsk	1	0.5	4	0.5	0	2.16667	2.25
Ctsl	194.5	403	653	73	112	477.667	541.25
Ctsw	1	23.5	1	3	0	0.166667	0
Cutal	17.5	2.5	0	0	0	3	2
Cux2	2	1.5	9.5	1.5	0	0	0
Cxcl10	1	0.5	104	2	28.5	0.666667	0.25
Cxcl12	510	102.5	2.5	57	30.5	246	287
Cxcl16	3	0.5	18.5	4	1	29.8333	36.5
Cxcl9	0	0	8	0	2.5	0	0
Cyb561	6	5	1	16	1	86.6667	45.5
Cyb561d1	1.5	2	1	2	3.5	1.33333	1.75
Cyb5r1	9.5	14	4	4	0.5	41.8333	36.75
Cyp1a1	0	0	0	1	0	1.33333	1
Cyp1b1	0	0	1	0.5	0	3.16667	5
Cyp26a1	0	0	2	0	0	0	0
Cyp4b1	0.5	0	48	19.5	6	55.8333	28
Cyyr1	63.5	34	16	72	17	6.16667	10.25
Dab2	60	88.5	169	9	40.5	30	24.5
Dbp	46.5	7.5	11	6	5	7.16667	5.75
Ddc	184	68	12.5	1.5	6.5	0	0
Def6	36	81	2	10	4	18.3333	16.75
Degs1	28	52.5	144	38.5	51	178.667	157.5
Degs2	50.5	2	0	0	0	0.5	0
Dennd4b	0.5	1.5	9.5	2	2.5	1.33333	1
Depdc1a	0	2.5	2	10	3.5	2.33333	2
Diaph2	7	13.5	1.5	1.5	3.5	7.83333	8.25
Dkk2	1	0.5	0	2	10	5	6
Dmd	59	12	48.5	4	1.5	25.3333	25.75
Dnah10	0	0	1	0.5	4.5	0	0
Dnah8	16	3.5	2	12.5	0	0.5	1.25
Dnajb5	7.5	28	6.5	5.5	3	14.1667	15
Dnase1l3	0	0	175.5	0	0	0	0
Dock5	0.5	1.5	0	0	0	4	7
Dock9	46	34.5	8.5	30	14	40	83.75
Dok4	34	147.5	11.5	42.5	51	7.33333	5.75
Dpagt1	54	19	28.5	15	10.5	35.5	23
Dpm2	18	33	6	12	8.5	41.6667	31.5
Dpp4	9	13	154.5	52	9.5	3.5	1
Dpp7	1	4	10.5	4.5	4.5	14.8333	12.5
Dpysl2	18.5	17	6	41	15	20.8333	42.75
Dse	0	1	18	3.5	5.5	1.83333	1.75
Dusp27	0	3.5	0	0	0	0	0
E330009J07Rik	12	19.5	0	1	2.5	1.66667	2.5
Eci2	28	113.5	28	39	36.5	49.8333	45.25
Edil3	0.5	4	0.5	14	2.5	0.333333	0.5
Edn3	22.5	5.5	0	1	0	0	0
Ednrb	1.5	7.5	61.5	22	232	12	8.5
Efcab7	5	3.5	1	24.5	7	3.16667	3
Efr3b	53	45.5	1	5.5	8.5	2.66667	6.5
Egfl8	30.5	82.5	0.5	11	19	2.83333	3.25
Egflam	16.5	16	0	3	0	0	0.5
Egln3	0	0	3.5	0	42	14.3333	15
Ehd1	107.5	78.5	62.5	244	69.5	85	66.5
Ehd2	27.5	23	5.5	109.5	44	63.3333	91.25
Ehd3	4	1	115.5	1	12	14.6667	11.75
Eif4e3	3.5	2.5	5	7	15	4.66667	5.25
Elac2	18	20.5	3.5	9.5	6	7	5.75
Elovl7	26	5	0.5	0	0.5	22	13
Emcn	138.5	54	44	136	338.5	1397.17	1514.5
Emid1	1.5	0.5	2	19.5	48	0	0
Engase	4	4.5	8	1.5	1	2.83333	2
Enox2	7.5	5	10.5	5	5.5	6.5	10
Enpp2	57	91	0.5	11	2.5	13.3333	22.25
Enpp3	10.5	9	0	1.5	25	0	0
Enpp4	12	2.5	4	8.5	3.5	17.3333	21.75
Eogt	175.5	268.5	10.5	76	93	64.5	70.25
Epb41l2	88.5	66	264.5	171	90	20.5	33.75
Ephb1	0	1.5	0	2	10.5	0	0
Ephx1	75	7	4	10	14.5	97.5	91
Eps8l2	44.5	6.5	0	2.5	4.5	10.8333	14.75
Erlin1	7	8.5	97.5	31	3.5	9.66667	9.5
Esam	1084	965	348.5	765.5	455.5	628.167	532.75
Esm1	0.5	3.5	3	5.5	45.5	19.1667	89
Esrrb	0	0.5	1	0	0	0	0
Esyt2	166	72.5	13.5	30	28	114.167	130.25
Etfbkmt	1	3	2.5	1	11	1.16667	1
Eva1c	0.5	0	3	1.5	0.5	25.8333	18.25
Exosc5	4	17	1.5	5	6.5	29.5	15.5
Extl3	122	64.5	2	15.5	10.5	21.5	32.75
F2rl3	0	2.5	0	1	7.5	10.1667	8.5
F8	0	0	57	0	25.5	0.5	1
Fabp9	0	0	0	0.5	13.5	0	0
Faim	82	130.5	17.5	27.5	27.5	27	26.75
Fam102b	2	15	4	5	5.5	16.8333	25.5
Fam107a	14	5	0	1	0.5	2.83333	3
Fam124a	0	0.5	107	5.5	0	1.83333	1.25
Fam129a	15	35.5	3	3.5	0.5	22.3333	20
Fam13a	10.5	29.5	0	6.5	1	1.5	0.5
Fam13c	37.5	12.5	0	6.5	4.5	1.83333	2.75
Fam174b	2	7	56.5	28	10.5	1.5	0.75
Fam181b	16.5	2.5	0	12.5	4	7.16667	4.75
Fam189a2	13.5	9.5	5	4.5	2	3	1.5
Fam205a3	0.5	2.5	0	0	0	0	0
Fam20a	5	0	14.5	1.5	0	2.16667	1.75
Fam220a	22	6.5	4.5	7	7	21	22
Fam222b	7.5	6.5	9	5.5	4	10.8333	6.75
Fam57a	15	50.5	12.5	21.5	14	47	36
Fam83d	0	1.5	1	11	3	3.5	2.5
Far2	12.5	12	0	0	0	9	8
Fbln1	0.5	10	0	2.5	3.5	1.33333	1
Fcgr2b	0.5	1	321.5	2.5	1	0	0
Fcgrt	219.5	126.5	165.5	19	30	63.5	38.75
Fchsd2	20	32.5	105.5	65.5	47.5	10	17.75
Fen1	2	9	5.5	21.5	7.5	13	9.25
Fgfbp1	1	15.5	0	0	0	1.66667	2.5
Flrt3	0	0.5	2.5	2	25	0.166667	0.25
Flt1	1154.5	537.5	107	72	104	64	116.75
Flt4	17.5	18	51	10	12.5	27.5	39.75
Flvcr2	15	31	0	0	0	2.16667	1.75
Fmn1	0	0	13.5	0	3	0.333333	0.75
Fmo1	32	29	54	254	11	1.5	1
Fmo5	13	4.5	2.5	3.5	1.5	2.66667	1.5
Fn1	1268.5	1989	12	313.5	84.5	779.333	1346
Fndc3c1	0	0	0	1	0	0	0
Fndc8	0	0	1.5	0	0	0	0
Focad	9.5	11	2	5	3.5	5	4.25
Foxc1	20	16	0.5	1	1	16.5	17
Foxf1	9.5	9.5	0	102.5	0	16.8333	8.5
Foxf2	36	49	0	1	0	32.5	26
Foxl2	7	4	0	0	0	5.83333	2.25
Foxq1	26	25.5	0	0	0	2	3
Frat1	0	0.5	0	0	1.5	0.333333	0.5
Fry	134	75.5	2	12.5	10	12.6667	18.25
Frzb	0	13	0	0	1.5	114.167	122
Fth1	1976	6707	391.5	463	557.5	6759.17	2757
Fut8	92	52.5	4.5	12.5	18	12	15.5
Fxyd5	107.5	65.5	27	41.5	52	305.333	284.75
Fyco1	31.5	17.5	6	7	5	2.83333	4.75
Fzd6	98	86	9.5	22.5	14.5	39	56
Gabarapl1	72.5	142.5	31	29.5	49	80.6667	71.25
Galnt2	21.5	3	24	9	5	30.6667	35.5
Galt	13	20	2.5	2.5	2	31.3333	24.5
Gan	0.5	1.5	2	1.5	1	1.33333	1.75
Gas2l1	7	11.5	17	12	11	69.3333	33.5
Gas6	44.5	10	13	10.5	21	98.6667	133.25
Gata2	64	14.5	4	38	14	31	31.25
Gata4	0	0	55	0	0	0	0
Gatm	64	84.5	229.5	2	16	6	5.25
Gbe1	39	20	3.5	6	5	19.5	14.75
Ginm1	126.5	88.5	32.5	47	44.5	91.1667	71.5
Gja4	21	29.5	11	69	21.5	5.66667	3.25
Gkn3	49	4	0	0.5	0	0	0
Glb1l3	0	0	0	1.5	0	0	0
Glis3	0	0	0	9.5	2	4.33333	4.25
Glp1r	0	0	3	122.5	0	0	0.25
Gltp	162.5	84	34	113	34.5	81.3333	41.75
Glul	537	355.5	143	249.5	106.5	84.1667	162.25
Gm12166	0	0	0	2	14	0.5	0
Gm14137	0	0	0	0	1	0.333333	0
Gm14698	0	1.5	0	0	0	5.16667	9.5
Gm17655	3.5	3.5	19.5	2	2.5	1.33333	1.5
Gm20503	0	0	0	0	4.5	2	0
Gm21860	0	0	36	1	0	0.5	0.25
Gm21985	0	0	0	0	2	0.166667	0.25
Gm28048	24.5	14	9.5	3.5	12.5	3.16667	2.75
Gm28053	9	39	3.5	14	0	4.5	7
Gm3512	0	0	0	0.5	3.5	0.5	0.5
Gm3526	0	0	0	0	2	0	0
Gm3591	0	3.5	0	0.5	0	0.333333	0
Gm36028	0	2	0	0	0	0.5	0.5
Gm6034	0.5	0	1	0	0	0	0
Gm6356	0.5	2	0	0	6	0	0
Gm9903	0	0	1	0	0	0	0
Gna14	0	0.5	0	19.5	0	4	2
Golga7	41	39	80.5	34.5	45	91.1667	65.25
Golim4	442	319	50.5	125.5	81.5	14.6667	26
Gp1ba	0	0	1	0	0	0	0
Gpatch2	4	9.5	13.5	10.5	5	3.33333	4.25
Gpc1	0	0.5	3.5	1.5	0	1.66667	1.25
Gpcpd1	316.5	242.5	28	30.5	16	30.1667	33.75
Gpd2	148	247.5	18.5	40	86.5	23.3333	29
Gpr108	12.5	13	3	8	7.5	20.1667	14
Gpr146	26.5	7	5	6.5	5	14.3333	14.25
Gpr160	43.5	2	1	0	1	0.333333	0.5
Gpr182	1.5	1.5	86	11.5	11.5	8.83333	3
Gpr4	26.5	22	5.5	2.5	7	41.3333	20.5
Gprc5b	8.5	7.5	2	1.5	22	19	37.25
Gprin3	0	0	0	3	0	0	0
Gpx1	176	120	67.5	71.5	105.5	1169.17	517.25
Grap	88.5	86.5	34.5	45.5	22.5	145.5	125.5
Grb14	48.5	45.5	0	8	6.5	4.16667	4.5
Grb7	2.5	4.5	0	0	0	0	0
Gstk1	22.5	12	35.5	14.5	11	10.3333	8.5
Gstm7	26	24	0	2	4.5	3	3.5
Gulp1	5.5	9.5	0	21.5	3.5	25.3333	32
Gxylt2	0	0	0	6	0.5	0.166667	0
Hadh	26	42.5	11.5	16	16	23.3333	21
Hadhb	89.5	141	29.5	33.5	55.5	91.8333	67.5
Has2	0	0	0	2.5	0	1.83333	1
Hcn2	1.5	2	0	0	0	3.66667	3
Hdx	0	0	0	1	0.5	0	0.25
Heatr1	7.5	5.5	53.5	6	9	9.33333	9
Hey1	32	18.5	3	44.5	17.5	12.1667	14.75
Hgf	0	0	12.5	7.5	0.5	0	0
Hic2	0.5	0.5	0.5	1	3	0.166667	0.5
Hipk3	39	22	9.5	20.5	15.5	43.8333	59.75
Hivep3	2	0.5	15	3	3	0.333333	0.5
Hmgcs2	62.5	76.5	0.5	0.5	2	0.166667	0
Hpd	0	0	8	0	0	0	0
Hpgd	0	0.5	71	355.5	8.5	0	0
Hprt	77	97.5	30	41.5	40	163.333	123
Hps4	1.5	6	4	4.5	16.5	7.16667	6.5
Hpse	0	0	1.5	0	0	0	0
Hs3st3b1	0	0	9.5	0	2	1.66667	2.5
Hsd17b7	1.5	5.5	2.5	4	10	9.5	7.25
Hsf4	0.5	2.5	0	0.5	0	0.833333	0.75
Hspb1	261	24.5	1.5	18	25.5	1619.83	1147.25
Hspb8	1.5	1	0	1	9	33	31.5
Htra3	4.5	90.5	0	1.5	0.5	0.833333	0
Hyal1	27.5	6	4	8	5	2.66667	4.25
Id1	212.5	66	34.5	81.5	32	137	116.25
Idua	4	3	5	3	1.5	7	6.25
Ifit1bl2	0	0	0	0	1	0	0
Ifitm10	0	0	4.5	1	0	1.83333	0.75
Ifitm2	75.5	21.5	268.5	104.5	113	382.833	212.5
Ifnar1	105.5	97.5	27	36	62	71.1667	123.25
Ifnar2	61.5	50	23	19.5	29.5	95	85.25
Ift27	9	7.5	15	9.5	7.5	26	8.5
Igdcc3	0	4.5	0	0	0	0	0
Igf1	0	4	1	3.5	105.5	0.833333	0.5
Igf1r	140.5	76	7.5	22	12	19.1667	25.75
Igf2	5.5	22	20.5	89	190	0.666667	0
Igfbp3	17	9	1	0.5	176	788	694.75
Igfbp4	14.5	221.5	334	235	175.5	7.33333	16.75
Igsf3	1	0.5	9.5	2.5	1.5	2	2
Igsf5	15.5	17	0	1	4	8.83333	7.5
Il10rb	79.5	26.5	21	16	25.5	31.8333	26.25
Il11ra1	22	88.5	19.5	9.5	18	38	29.25
Il12rb1	0	0	1	0	0.5	0.166667	0.5
Il13ra1	12	9.5	15.5	5	7	19.3333	27
Il1a	0	0	58.5	0	0	0	0
Il27ra	0.5	2.5	5.5	1	2	3.16667	2.25
Il6st	82	72.5	250	76.5	59.5	81.5	87.75
Ildr2	9	40.5	0.5	2	0.5	7.5	12
Incenp	4.5	29	23	87.5	29.5	4.33333	3
Inhba	0.5	1.5	0	4.5	0.5	5.5	3
Inpp1	9.5	39	7	6	8	13.1667	10.75
Irx3	1	0	0	0	37	1.5	1.5
Irx5	0	0.5	0	0.5	7	0.166667	0.5
Ism1	9	5	0	1.5	0	7.66667	13.25
Isyna1	155.5	306	5	24	74.5	7.33333	4.5
Itga2	0	3	2	30	3	2.16667	3
Itga4	8.5	49.5	0.5	6.5	0	14.6667	16.25
Itga9	0	3	60	7	25	6.16667	6.5
Itih5	62.5	3	0	0.5	0	1.83333	8.5
Itm2a	1785.5	659.5	1	9	9.5	134	101.75
Itpka	0	3.5	0	0	0	0	0
Itsn1	17	32	160	29.5	54	6	7.75
Jak1	38	36	189	76	64.5	42.1667	52.5
Jak3	6.5	16	20	9.5	8	7.16667	5.5
Jam3	3.5	4	2.5	5.5	32.5	10.5	9.25
Jazf1	1	0.5	1	0.5	0.5	8.83333	8
Jcad	241	113.5	15.5	56.5	28.5	88.5	148
Jup	64	68.5	20	192	65	100.167	99.75
Kbtbd11	67	131.5	0	0	4.5	1.16667	3.75
Kcna5	0.5	2.5	0	0	0	14.5	7.25
Kcna6	0.5	8	0	0	1	0	0
Kcng2	0	3.5	0	0	0	1.33333	0.75
Kcnh1	0	0	0	3	0	0	0
Kcnj14	1	1.5	3	0	0	0	0
Kcnj2	10	42	3	1	2.5	7.66667	14.5
Kcnk6	1	0.5	5	2	0.5	1	2.25
Kcp	9	84.5	0	0.5	1.5	0.333333	0
Kctd12	24.5	12.5	6.5	16.5	31.5	3.33333	5
Khdrbs3	3	6.5	71	1.5	32	16.8333	18.25
Kif1c	44.5	43	13.5	27	19	51.6667	120.5
Kif20a	0	4.5	4	17	7	4	4.5
Kif26a	73.5	56.5	18.5	106	31.5	16.5	25
Kit	2.5	46	39.5	241	24.5	67.3333	38.25
Kitl	100	61	1.5	56.5	40	101	170.5
Klf13	21.5	20	6.5	15	11.5	57.6667	30.5
Klhdc8a	0	0	0	1	0	2.33333	1.5
Klhl2	25.5	39.5	9	13.5	6	27.8333	26.25
Klhl20	8	7.5	12	8.5	4.5	6.33333	7.75
Klhl3	1.5	2	3.5	1	0	1	1.5
Klhl36	1.5	2.5	7	2	3	4.5	2.75
Knop1	23	22.5	44	17.5	23	17.8333	22
Krt222	2	7.5	1.5	0	0	0	0
Krt80	0	0	0	7.5	0	0	0
L3mbtl1	0	0	0	3.5	0	0	0
Lama1	0.5	14.5	0	6	0.5	3.66667	6.5
Lamb1	5.5	124.5	1	38	39.5	74.3333	98.75
Lancl3	4	1	0	3	0	1.83333	1.5
Layn	49.5	11.5	9	14.5	24	13.5	19.75
Ldlrad3	27.5	24	0	4	3.5	6.5	6.75
Lef1	126	90	1	0	1	9.16667	7.25
Lepr	4	7	34	3.5	15	1	1
Lgmn	8	18	137.5	14.5	25.5	42.3333	50.75
Lgr5	0	0	1	0	4	0	0
Lifr	62.5	12	190	81	34.5	7.16667	11
Lipc	0	4	0	0	0	0	0
Lmbr1	17	79.5	10	9	7.5	9.33333	9.75
Lmntd1	6.5	14	0	1.5	0	0	0
Lmo7	70	14.5	7	20.5	19.5	21.1667	54.25
Lmtk3	0	1	0	0	7	0	0
Loxl2	0	2	13.5	8	5	33.1667	28.75
Lpar6	4.5	4	13.5	5	4	59.8333	46.25
Lpin3	0.5	0	1	0	0	79.3333	70
Lrmda	0	0	8.5	4	1	2.5	2.25
Lrp8	56	236	1	0.5	0.5	4.5	6.5
Lrrc18	1.5	1	3	0	0	0	0.5
Lrrc3b	0	2	0.5	4	11.5	1	1
Lrrc55	0	51	0.5	0.5	5.5	0	0
Lsr	118.5	80	0	1	1.5	29.6667	28
Ltbp4	128	52.5	82	57.5	53	3	2.5
Ltbr	39	60	16.5	20	206	48.3333	37.25
Ly6a	1231	138	40	186.5	264.5	1455.17	1637.75
Ly6c1	2433	453.5	1	109	284.5	515.833	646.5
Ly75	12.5	39.5	0	0	0	33.8333	44.5
Lysmd2	18.5	12	0.5	26.5	4.5	46.8333	36
Lyve1	0	0	154	92	0.5	2	2.5
Madcam1	0	10.5	0	0	0.5	0	0
Maf	0.5	1	89.5	2.5	3	1.33333	2
Man1a	9	15	35.5	5	14	84	77.75
Maoa	78	64	3	27.5	8.5	31.8333	41
Maob	15	2.5	0	3	0	2.83333	4.5
Map3k1	53	39.5	14.5	16.5	25	2.5	4.5
Map7	6	72	1	1.5	7	1.33333	1.75
Mapk11	1	6	13	8	8	7.83333	7.5
2019-03-02	92	174.5	48	78	52.5	127	139
Marveld2	35.5	14	0.5	6.5	0.5	3.83333	10.75
Masp1	0	1	37.5	1	0	4.33333	4.25
Mb21d2	1.5	2	7.5	1.5	3	2.66667	3.5
Mbd4	2.5	3.5	39	10.5	7	1.33333	1.5
Mcc	26.5	8.5	1.5	23	5	6	13
Mcf2l	135	173	0	67.5	30.5	10.5	10.25
Mcm6	0.5	28.5	13	61	25.5	22.1667	18.25
Mcur1	11	8	2.5	7.5	4	13.3333	11
Megf6	14.5	39.5	7	10	0.5	0.5	0.5
Meis2	0	4	159.5	103	588	0.333333	0.5
Mertk	14.5	5.5	20	8	6	91.8333	126.75
Mettl8	4.5	6	4	5	12.5	4	2.5
Mfsd2a	261	750.5	0	0	0	2	1.5
Mfsd4b4	0	1	1.5	0.5	0.5	1.66667	1.75
Mfsd5	15	14.5	23	14.5	9	79.3333	35.5
Mgat4a	7.5	20	0.5	0	1.5	7.33333	9.75
Mgat5	2.5	5.5	11.5	5	6	4.33333	11.25
Mid1	11	6	47	9.5	15.5	4.66667	6.75
Mif4gd	53	66	6.5	13	8	15.8333	11
Mindy1	86	61	27	43	42.5	30.8333	26.25
Mindy4	1	2	8.5	3.5	1.5	1.66667	1
Mlycd	8	8	1.5	3	1.5	12.5	9
Mmp25	2	11.5	0	0	1	1.5	0.5
Mmrn1	0	13	0	1	0.5	0.666667	0
Mn1	0.5	0	0	1	4	0.5	1
Morc4	2	9	14	5.5	2.5	2.16667	2.25
Mospd1	37.5	46.5	13	13.5	10.5	39	36.5
Mpped2	1.5	6.5	0	14	4	0.333333	0.25
Mpzl1	216.5	302.5	34	60.5	89.5	85.8333	39.25
Mrc1	0	0.5	141	0.5	1	0	0
Mrm2	7	0.5	4	1	1.5	5	3.25
Mroh7	0	0	1	0	0	0	0
Mrpl47	8	2.5	7.5	3.5	3	13.6667	11.5
Mrtfb	40	28.5	5.5	16	20	12.8333	21.5
Msr1	0	0	90	0	4.5	0	0
Mtmr6	46	48	16.5	19.5	14.5	38.8333	42.75
Mtpap	29	25	11.5	10.5	9.5	15.6667	14.75
Muc2	0	0.5	15.5	0	0	0	0
Muc3a	2	1.5	0	0	0	0	0
Mybl1	0.5	0	1	2.5	5	1.5	2.75
Mybpc1	0.5	0	0	0	3	0	0
Myh10	147.5	1427	58.5	109	259.5	14.6667	35.25
Mylip	6	3	43.5	8.5	11	1.83333	1.5
Myo1b	196.5	494.5	27.5	152	170	66.6667	81
Myrip	12.5	1.5	0	2.5	0	5.66667	6
Myzap	8.5	13	55	315.5	18.5	4.83333	4.25
Naga	3.5	7.5	10	16	29	26.5	23.75
Naip2	0	0	0	0	2.5	2.33333	4
Nampt	163	599.5	20.5	26	51.5	23.6667	26.25
Napepld	4	4	0	0	0.5	1.66667	3
Nbl1	16	2	0.5	2.5	7.5	32	17.75
Nckap5	4	6	0	100.5	0	0	0
Ndnf	52.5	13.5	0	5	0	1	3.75
Ndrg1	156.5	4	31	7	67.5	143	114
Neb	0	0.5	9.5	0.5	0	0	0
Nebl	62.5	37.5	0	5	13	11.8333	20.75
Neil2	0	0	3	0	0	0	0.5
Net1	116	124.5	12.5	45	15	8.66667	9.75
Neurl1b	1	0	0	5.5	1.5	3	6.75
Nfil3	6	2	0	4	22.5	8.5	5.25
Nomo1	31.5	96.5	8	6.5	10	31.5	43.25
Nos2	1.5	12	0	2.5	1.5	4.33333	1.25
Nos3	43	40.5	9	8	14	55	57.25
Notum	48.5	79	0.5	0	1.5	0	0
Nova1	0	1.5	0	5	0	0	0
Nox1	0	0	0	1.5	0	0	0
Npl	1.5	3	39	2.5	14	0.166667	0.5
Npr2	7	5.5	19.5	6	3	12.5	17.5
Nqo2	10	10.5	25.5	18.5	14	13.3333	11.5
Nr1d1	43	4	7.5	3.5	4	8.66667	5.75
Nr2f2	7	9	57.5	19	23	4.66667	4
Nr3c1	39	25.5	12.5	23	17	19.5	22.75
Nr5a2	0	5	16	5	11.5	0.5	2
Nrp2	12	15	33	7.5	17.5	88	71.5
Ntn4	12.5	2	13	6	8.5	28.5	38.25
Nts	0	0	13	0.5	2	1.33333	0.5
Nudt12	6.5	7.5	2	0.5	2	3.5	3.5
Nudt8	0	4.5	1	1	0	12.3333	6
Ocln	164	100.5	0	31.5	6	62.1667	55.25
Oit3	0	0	129.5	0.5	0	0.333333	0
Olfm1	0.5	10	34.5	5.5	7.5	6.33333	4.5
Oplah	4	13	2.5	5.5	1	4.83333	4.25
Optc	0	0	0	0	2.5	0	0
Orc1	0	0.5	1.5	5	0.5	0.5	0.5
Oxct2a	0	0	1	0	0	0	0
P2rx4	11	4	10	5.5	3.5	20.8333	28.5
P2rx5	0	1	0	0	0	4	5.75
P2rx7	3	2	4.5	15	1	7.16667	9.25
P2ry1	2	0.5	13	0.5	2	9.83333	14.25
Pabpc4l	2	2	10.5	6.5	6	0	0.25
Paox	0	2.5	1	0.5	5	5.66667	4.25
Paqr7	13.5	11	2.5	3.5	0.5	20.3333	19.5
Parvb	100	81	17.5	70	24.5	9.16667	12
Pbx1	19.5	17.5	9	29.5	213.5	3.83333	6
Pcbp3	4	12.5	4.5	40	13.5	10	6
Pcdh19	11.5	14.5	0	0	2	9.66667	11.25
Pcdhb2	0.5	0	1.5	0	0	0.333333	0
Pcdhb20	1.5	4.5	1	2.5	1.5	2.33333	2.75
Pcdhgb4	1.5	1.5	2	1	0.5	3.83333	4.75
Pcgf5	10.5	6	5	19.5	7	38.6667	35.25
Pcp4l1	331	25.5	8	1.5	1	15.6667	32.5
Pcx	8.5	40.5	1	0.5	3	5.16667	4.5
Pde2a	283.5	76.5	210.5	16.5	99.5	142.5	152
Pde3a	1.5	1.5	0	23.5	2	0.5	1.25
Pde9a	0	12.5	0	45.5	2.5	0	0
Pdia5	72.5	16	9	9.5	42	10.8333	6.25
Pdk4	2	4.5	8	1	2.5	17.3333	15.75
Pdxk	34	16.5	0.5	1	0	6.83333	6
Peak1	18.5	14.5	80.5	45	46.5	24	39.5
Peg10	0	2	6	2.5	3	0	0.5
Peli1	26	19.5	8.5	15.5	10.5	13.5	12.75
Pgghg	2	2	6	2	0.5	7	5.5
Pglyrp1	224.5	236	1	0.5	0.5	9.5	5.75
Phactr4	106.5	102.5	32	57.5	50.5	11.8333	17.25
Phf11a	0	0	0.5	0	4.5	0	0
Phlda3	1	2	3	13.5	5.5	189.5	98.5
Phyhd1	1	3	6	1	2.5	11.1667	7.25
Piezo2	0	7.5	3	68.5	27.5	0.166667	0.5
Pik3c2a	92.5	54.5	36	31	40.5	81.6667	119
Pip5k1b	5	8.5	0	0	0.5	1.66667	3.5
Pir	17	6.5	0	2.5	5	12.5	11.75
Pkdcc	1.5	3	12	6	1.5	4	2.5
Pla2g2f	0	1.5	0	0	0	0	0
Pla2g7	1	3	46.5	1.5	4.5	0	0
Plcb1	26	7	4	16.5	14	4	7
Plekha2	19	6.5	11.5	59.5	1.5	24.6667	17
Plekhf1	0	0	1	0	0	1	0.5
Plekhg1	45	59	70.5	34	33	13.1667	30.25
Plpp6	18.5	13	1	2	2.5	27.8333	22.5
Pltp	844.5	417	1	90.5	15.5	47.3333	33.25
Plxna1	6	23.5	7.5	59.5	11	8.5	11
Plxna2	11	7.5	11	5	7.5	43.5	76.75
Plxnc1	0	1.5	223.5	10.5	0	0	0
Pmaip1	80	32	0	4	0	102.333	56.25
Pmepa1	34.5	92.5	4	15.5	16.5	22.1667	21
Pnpla2	42.5	33	15.5	24.5	19	154.833	86
Pnpt1	4	22.5	4.5	8	9.5	14.5	13.75
Polk	65	6	10	4.5	2.5	14.8333	18
Pomc	14	7	1	1.5	0.5	0.833333	0.5
Pon2	83.5	148	37	41.5	50	56.6667	55.5
Pou2af1	0.5	3	0.5	0	0	0	0
Ppard	124	80	10.5	13	4	2.5	7.75
Ppef1	0	1	0	0	0	1	1
Ppm1h	21.5	31.5	1.5	6	7.5	5.83333	7.5
Ppp1r14a	7.5	0.5	17.5	6.5	1	18.1667	10
Ppp1r17	0.5	23	0	0	0	0	0
Ppp3cc	15.5	6.5	2	3	1	15.5	18.75
Pqlc2	1	1	5.5	1.5	0.5	10.8333	5
Prc1	0	40	36	180.5	50	9.5	11.25
Prdm8	0	0	0	13	0	0	0
Prickle2	0.5	2	3	12	3	0.666667	1.25
Prkg1	4	3	6	3	1.5	2.5	2.5
Prmt7	2	9	3	5.5	22	25.3333	9
Prnd	2.5	107.5	0.5	15	12.5	396	320.5
Prnp	76.5	164	2.5	17	16	656.333	562
Procr	13	27	8	19	95.5	208.5	205.25
Prom1	685.5	127.5	2	15.5	30	98.5	101.75
Pros1	88	41	58.5	24	28.5	115	120.5
Proser2	25.5	21.5	0	0	1	14.3333	7.5
Prox1	0	0	2.5	1	1	0	0
Prr5	1	11	1.5	1.5	2.5	30.5	6.25
Prrc1	8	30.5	7	10	11.5	22.3333	16
Prss12	0	0	0	13	0	2	3
Prss23	78.5	14.5	12.5	59.5	12	1494	1827.25
Prx	0	0.5	0	47.5	3	0.833333	1
Psd3	12.5	13.5	58.5	14.5	7.5	1.33333	1.75
Psors1c2	0	4	0	0	0	0	0
Ptch2	0.5	1.5	12.5	1.5	6.5	0	0
Ptges	2.5	20	0	0	0	14.6667	7
Ptgis	1.5	7	0	2	0	58	38
Ptpn22	5.5	3	0	0.5	0.5	2.33333	7.25
Ptprb	160	111	184.5	101	98.5	58	92.75
Ptprg	484	373.5	17.5	194	100.5	32.6667	55.25
Ptprm	72	73.5	29.5	157	65	33.6667	52.75
Ptprr	20	10	0	0	1	1.5	0.5
Ptpru	3.5	3	2	22.5	103.5	0	0
Pxk	36.5	26	37.5	15.5	17	19	17
Rab11fip1	37	17	0	0.5	1	4.16667	5.25
Rab33b	5	6	7.5	4.5	5	20.1667	17.25
Rab3b	0	0.5	10.5	0	0.5	0.666667	0
Ralgps2	3	29.5	61	13	43.5	3.16667	1.5
Ramp3	1.5	1	0	5	20	15.1667	17.75
Raph1	8.5	64	80.5	60	33	34.1667	37.75
Rasal2	19.5	15	18.5	12.5	7.5	13.6667	11.75
Rasgef1a	0.5	0.5	0	10.5	0	1.33333	0.75
Rbm20	2	1.5	0	0	0	0.5	1
Rcan3	10.5	18	4	7.5	2.5	18.3333	21.75
Rcbtb2	22	28.5	54	37	26	29.8333	24.75
Rdh13	2	6.5	5	3.5	15.5	5	4.25
Reck	13	4	0.5	2.5	3	5.33333	10.5
Reep1	17	49	6.5	14	5	2.66667	2
Reg2	8	17.5	28	11	10	0	0.25
Renbp	2	7.5	19	4	8.5	24.8333	16
Rerg	0.5	0	21.5	3	3	0.333333	0
Ret	4	4	0	0	0	0.833333	0.75
Rfc5	0.5	4	1.5	18.5	3	7.16667	3.25
Rflna	0	0.5	0	0	6	0	0
Rfx5	3	4	7	3	3	3.33333	4
Rgl1	36	35	64.5	38	42.5	7.33333	9.5
Rgs6	2.5	7.5	0.5	2	0	0	0
Rgs9	0	2	0	14.5	1	1.33333	1.75
Rhebl1	0.5	2	1	5	14.5	1.66667	1
Rhod	3	5.5	45	0.5	4	22.8333	21
Rhpn2	4	1	0.5	5.5	0	1	1
Rnd3	18	3.5	29.5	15	14	91.1667	83
Rnf125	39	13	4.5	32.5	7.5	27.3333	24.75
Rnf144b	19.5	8.5	3	2.5	1	10.5	32.75
Robo3	0	0	0	0	6	0	0
Rp9	18	15.5	7.5	12	10	24.5	17.25
Rph3al	2.5	5	1.5	7.5	15	5.5	5.75
Rpl38	287	399.5	58.5	58.5	36.5	1201.83	993.5
Rpusd2	1	0.5	1.5	1	1	1.33333	1.5
Rras	84.5	54.5	37.5	41.5	25.5	207.667	104.25
Rras2	23	37	9	14.5	7	139.167	112
Rsad2	19	5.5	6	4	228	2.5	2.25
Rspo3	0	0	11.5	0	2.5	0	0
Rubcn	8.5	9.5	22	14.5	2	19.8333	20.75
S100a10	9.5	9.5	54	81.5	337	414	196.5
S100a4	2.5	0	0.5	2	140.5	22.1667	22.75
Samd5	1.5	4.5	3.5	17.5	0.5	1	1
Sapcd2	0	1	0	3	0	1.16667	0.75
Saraf	280	290.5	61.5	99.5	63.5	140.667	121.5
Scn3b	6	3	0	68.5	0	2.16667	3
Scn7a	0	0	0	315.5	0	0	0
Sdf4	91.5	64.5	39	54	50	114.667	87.5
Sec11c	60.5	130.5	16	17.5	20.5	66.5	56.5
Sectm1a	0	0	2.5	0	0	0	0
Sele	0.5	0.5	12	1	1.5	1.16667	0.75
Selenop	1906.5	2000.5	2916.5	219	162.5	803.5	764.5
Selp	1	0.5	39	1	1	0.5	0.75
Sema3c	339.5	17	0	214	4	8.5	11.5
Sema5b	0	0.5	0	0.5	14	0	0
Sema6d	11.5	77	14	28.5	21	5.33333	10.75
Sema7a	128.5	106.5	0	31	12	66.1667	158.75
Serinc5	31	35	11.5	12.5	9	24.5	32
Serpina1b	18.5	3	3	1	0.5	0	0
Serpinb6a	125.5	40.5	87	42	21.5	248	253.25
Serpinb9	24.5	9	3	13.5	14	10	7.5
Sgms1	214.5	42	28	20	27	110.833	135
Sgms2	14.5	10	0	0	0	53.6667	75.75
Sgpp1	6	5.5	28	2.5	7.5	8.5	4.75
Sgpp2	13.5	2.5	0	0	0	0	0
Shc4	0	0.5	0	3.5	0	0.333333	0.25
Shld1	10	10.5	1.5	1	3	6	4.25
Shpk	0.5	0.5	1	0	0	2	1.5
Shroom1	49	42	0	5.5	0	8.16667	5.25
Shroom4	23.5	24.5	5	15.5	9	19.5	42.75
Sigmar1	8	40.5	10	9.5	4.5	40.5	26.75
Skida1	1	0.5	0.5	1	6	0.833333	0.5
Slc10a4	0	0	0	0.5	6	0	0
Slc16a1	197.5	441.5	3	1	2	26.1667	18.75
Slc16a14	0	4.5	0	0	0	0	0
Slc16a2	114	49.5	9	3.5	14.5	12.8333	9.25
Slc16a4	65	42.5	0.5	0	1.5	5.16667	8.5
Slc16a9	11.5	9.5	0	4.5	0	12	11.75
Slc17a5	2	6	15	5	6	6.66667	7.5
Slc19a3	39	10.5	0	0	0	1.33333	1.25
Slc1a1	68.5	23	0	2	1	48.8333	38.5
Slc1a4	0	62.5	0	0.5	0	12.5	8.75
Slc22a4	0.5	0	0	0	2	2.66667	1.5
Slc22a8	181	238.5	0	0	1	0	0
Slc24a5	0	0.5	6	0	0	0	0
Slc25a28	1.5	4	11	5.5	4.5	8	6.25
Slc25a34	0	0	0	0	1	0	0
Slc25a35	7	2	5.5	3.5	0.5	2.83333	1.5
Slc26a10	16.5	2	37.5	8	6.5	0	0
Slc29a3	2.5	2.5	1	5.5	2.5	4.5	2.75
Slc2a1	1702	649.5	3	4.5	10	423.333	290
Slc2a13	0	0.5	1	0.5	0.5	1	1.25
Slc30a1	220.5	129	9	24	13.5	21.6667	37.75
Slc31a1	26.5	61.5	8.5	7	7.5	49.1667	29.5
Slc31a2	14.5	20.5	29	14.5	17	40.6667	30.75
Slc35f2	69	86.5	0	0.5	1	4.33333	4.25
Slc38a2	12.5	150	17.5	38	47.5	167.333	208.25
Slc38a3	237	298	0	1.5	0.5	2.16667	1.25
Slc38a4	0	0	0	1	4.5	0.166667	0
Slc38a5	81	279.5	0	2.5	0	1.5	0.5
Slc39a10	498.5	412.5	11	28.5	20	9.16667	9.5
Slc39a8	48	149.5	31.5	2	1.5	10.6667	8.75
Slc3a2	2072	3575.5	145	182.5	159.5	168.667	101.5
Slc40a1	320	449	65.5	0.5	21	19.6667	32.75
Slc44a5	0	8.5	0	0	0	0	0.5
Slc46a3	14.5	27.5	2	2	0.5	14.5	16.75
Slc52a2	7	12	0.5	1	0.5	9.5	6.5
Slc52a3	8	4	0	0	1	8	7.5
Slc5a6	21	48	1	3	6	2.33333	2
Slc6a6	420.5	196	10.5	135	124	14.5	14.25
Slc7a1	107	279	2	5	11	27.1667	21.5
Slc7a3	23	29.5	0	0	0.5	1	0.5
Slc7a5	255	548.5	12	1.5	4	112	46.75
Slc7a8	1	39.5	1	0	1	0.5	1
Slc9a1	5	18	29.5	21	9.5	5.16667	5
Slc9a4	2	5.5	0	0	0	0	0
Slc9a9	0	1	13	0	1.5	0.166667	0
Slco1a4	743.5	109.5	0	0	0	34.8333	31
Slco1c1	1734	1687.5	0.5	1	0.5	3.33333	3.25
Slco2b1	48	119	0	1	2	17	8.75
Slfn3	13.5	3.5	7.5	6.5	25.5	4.66667	6.5
Smarca2	203.5	117.5	99.5	332.5	71.5	9.66667	17
Smoc2	3	9	1	0	0	1.16667	0.75
Smox	31.5	90.5	4.5	9.5	11.5	12.6667	9.75
Smpdl3a	31	21.5	6.5	9	7	38.1667	35
Sntb1	1.5	0.5	10.5	2	5.5	0	0
Snx2	40	50.5	129	46	38	43.1667	48.5
Snx21	3.5	1.5	12	4.5	3	12.8333	9
Snx29	11.5	8.5	19	11	12.5	1	2
Snx33	0.5	0.5	3.5	2	2.5	7.83333	8
Snx8	3	2	19	4.5	3	13.1667	10
Sorbs2	172	88.5	1	5	23	204.833	212.5
Sord	2.5	2.5	9.5	1.5	2	3.33333	2.5
Sos2	29	21	8	17.5	10.5	7.5	9.5
Sox11	0	3	1	5.5	10	0	0
Sparc	1850	1997.5	649	1099	1159.5	2994.17	2100.5
Specc1l	24	23	5.5	14	13	10.3333	17
Spns2	30	25.5	7	48	2.5	25.3333	21.75
Spock2	541.5	546.5	0	2.5	1.5	1.33333	4
Spr	43	16	5.5	12.5	11	28.6667	21.75
Sptbn1	849	419.5	129	382.5	298	101.667	294
Sptlc2	100	87	115.5	88.5	59.5	90.3333	84.25
Srarp	40	8	0	0	0	0	0
Srgn	519.5	265	61	313	251.5	369.167	344.25
Ssu2	1	0.5	0	0.5	6.5	0	0
St3gal4	8.5	4.5	52	13.5	22.5	15.6667	14
St3gal6	275	182.5	23.5	58.5	38	56.8333	47.25
St6galnac2	26	19	0.5	13.5	0	12.3333	17.25
St6galnac3	47.5	11	11	22	12	7.33333	7.25
St8sia1	0	5	0	0	1.5	0	0
St8sia4	37.5	30	0	20.5	3.5	30.3333	49.5
St8sia6	9.5	1.5	0	0.5	7	10.1667	27.75
Stab1	54	93.5	284	68.5	67.5	31.5	72.5
Stab2	0	0.5	641	0	1.5	0	0
Stac	0	1.5	0	0	0	0	0
Stard13	115.5	134.5	2.5	47	18.5	12.8333	20.5
Steap3	7	10.5	0	0.5	0	4	2.25
Stk32c	0	1	1	1	8	0	0
Stk38	75.5	48	17	54.5	22	11.5	12.5
Stk4	27.5	28	28	147.5	40	11.1667	10
Stra6	14	42	0	0	0	0	0
Stx1a	1.5	20.5	1.5	4.5	1	1.83333	1.5
Sulf2	6	3	0	2.5	51	13.8333	15
Sult1a1	17	3.5	11	2.5	3	107.333	113.75
Swap70	36.5	75.5	15	30.5	22.5	61.5	58.25
Syne3	0	0	0	0.5	1.5	0.5	2
Synm	39	47.5	0	11	0	10.3333	31
Synpo	2.5	5	5.5	12	30.5	114.667	120.75
Syt12	0	9	0	0	0	3.5	3.5
Tacr3	0	2.5	0	0	0	0	0
Taf9b	23.5	10	5	10.5	10	10.6667	10.25
Tbc1d14	43.5	42.5	5	6	6.5	7.16667	4.75
Tbl1xr1	97.5	67.5	2	42.5	60.5	17.1667	26.25
Tbx1	9	10.5	0	0	0	30.8333	26.25
Tbx3	21	14	0	60.5	8	4.16667	4
Tcea3	1.5	3.5	0	0.5	0	0.333333	0
Tcf7	49	65	1.5	16	7.5	1.66667	2
Tcf7l1	3.5	7	26.5	7.5	17.5	6.83333	1
Tdrp	152	195	22.5	10	17	13	13.75
Tec	25.5	9.5	0	0.5	2	38.8333	50
Tecrl	0.5	5	0	0	0	0.666667	0.25
Tedc1	0	1	0	5.5	0	1.83333	1.25
Tekt2	0	0.5	10	0.5	0	0.166667	0
Tes	12	36	3.5	11	14	101	78.5
Tex2	6.5	7.5	21.5	10	11.5	10.1667	15.25
Tfeb	17.5	12	5	5	5.5	7.83333	5.75
Tfec	0	0	16	0	0	1.33333	1.25
Tfpi2	0.5	1	9.5	0.5	0	14	19
Tfrc	167	410	8.5	6	9.5	50.5	70
Tgfa	11.5	20	3	0	0.5	9.5	12
Tgfbr3	23.5	8	22	8.5	4	12.8333	16.75
Thbd	47	10.5	10.5	77	31.5	72.6667	52
Tiam1	105	111.5	6.5	22	7.5	0.5	1
Tll1	0	1	0.5	2.5	5.5	9.16667	6
Tm2d3	20.5	38	5.5	5.5	5	44.3333	28
Tm4sf1	733.5	134	173.5	511	1147	1706.33	1289.75
Tmc3	0	0	0	0	1.5	0	0
Tmeff1	37	9	0.5	45.5	6.5	20.1667	18.5
Tmem100	3	2	0.5	174.5	0.5	1.83333	0.5
Tmem106a	0.5	2.5	41.5	5.5	3.5	2.33333	2.75
Tmem11	3	8	4	8	17.5	27.3333	13.5
Tmem123	70	60.5	10.5	26.5	22	116.5	98.75
Tmem132e	0	1	6.5	0	1	0	0.25
Tmem154	1.5	15	0	3	1	11	9.25
Tmem184b	113.5	112	23	77.5	46.5	102.667	59
Tmem200a	0	0	3	2	49	1.16667	1
Tmem204	93	49	27	41.5	19.5	44.1667	42.5
Tmem220	2.5	1	1.5	0	0	1	1.25
Tmem245	11	6	2.5	5	4.5	31.8333	23.75
Tmem252	3	5	0	1	1.5	64.3333	53.75
Tmem255a	0	3	2	0.5	23.5	0.333333	0.5
Tmem268	0.5	1	12	1	1	2.66667	2.5
Tmem51	10.5	7	10	0.5	1	34	24.75
Tmem64	4	5	13	4.5	5	24	16.25
Tmem71	1	0.5	0	2.5	0.5	4.33333	5.5
Tmem98	11	14.5	3.5	7.5	5.5	36.3333	18
Tmsb4x	2923	5106	617	983	1761.5	14162.8	9513
Tmtc1	13	6	0	1	4.5	4	7.25
Tnfaip2	0	1.5	4.5	7.5	24	25.6667	33
Tnfrsf11b	0	8.5	0	0	0.5	0.166667	0.25
Tnfrsf19	30.5	34	0	3	1.5	4.5	7
Tnfrsf1a	40	57.5	195.5	145.5	132	45.6667	41.25
Tnfsf12	28.5	2	18.5	14	4.5	6.83333	10.25
Tns1	187.5	35	49	48.5	55.5	80	119.5
Tob1	92	19	6.5	19.5	29.5	28.3333	20
Tpbgl	0	1	5.5	0	0	4.16667	1.5
Tpcn1	19.5	48.5	6	10.5	6	4.16667	8.5
Tpd52	64.5	31.5	12	4.5	15.5	113.667	98.5
Tpd52l1	13.5	23.5	0	0.5	0.5	17.5	15.75
Tprgl	111	85	41.5	60	59	172.333	93.25
Trdmt1	4.5	2	2	10	0	6.33333	5.5
Trf	4	130.5	11	11	6.5	14	10.75
Trim46	0	0.5	0	4	1	2.33333	3.25
Trim7	0	0	0.5	19	1.5	1.16667	1
Trmt9b	1.5	4	7	2.5	0	0.166667	0
Trpm6	5	6	0	0	0	4.16667	8
Tsc22d1	594	699	71	126.5	261	120.667	113.5
Tspan11	0	2	2	0	10.5	0	0
Tspan13	206	142.5	11	151	13	105.167	68.25
Tspan5	78.5	87	9.5	4.5	12	125.167	117.5
Ttll3	1	10	3	0.5	3	0.166667	0.25
Ttll7	21.5	6.5	8	3.5	1.5	12.6667	18.75
Ttn	1.5	1.5	0	0	0	0	0
Ttyh2	24	63.5	2	1	0	11.3333	10
Ttyh3	7.5	18	11	43	10.5	4.33333	5.5
Twist1	0	0	5.5	0	0.5	1.66667	0.75
Ube2c	0.5	21	12.5	49.5	14	25.6667	16
Ublcp1	8	26.5	7	12	5	12.3333	11.25
Ubxn2a	26	33.5	9.5	9.5	10	32.3333	42.75
Ulbp1	0	3.5	5.5	21	3	65.1667	109.25
Ush1g	0	0	1	0	0	0	0
Usp29	0	0.5	0	2.5	0	0	0
Usp53	45.5	34	3	9	4.5	12.8333	16.75
Utrn	192.5	59.5	30	60.5	60	20.8333	47.5
Vamp3	77.5	48	27.5	33	34.5	147.167	124.25
Vegfc	11.5	5	3.5	23.5	9	7	5.5
Vmac	18.5	7.5	4	5	5	9.66667	6.5
Vmn1r65	0	0.5	1	0	0	0	0
Vstm2b	6	11	0	0.5	0	0	0
Vstm4	4	1	24.5	2.5	0	0	0
Vwa1	115	146	0	1	5	232.667	214.75
Wbp1l	36	25	74	22	25.5	42.8333	37.5
Wdfy2	1	2.5	4	2.5	2.5	5.16667	6
Wfdc1	67.5	21.5	0	5.5	0.5	34	53.25
Wif1	0	0	0	26	0	0	0
Wnt2	0	0	41.5	3	0	3.5	0.5
Wwtr1	56.5	100.5	14	38	30.5	143	152.25
Xlr	10.5	10	0.5	0.5	0	17.8333	20.75
Xlr3a	1.5	7	0	1.5	0.5	0.333333	0
Xpc	6	18.5	38.5	22.5	6	7.16667	6.75
Ydjc	1	0	0	0.5	2.5	4.5	3.25
Ypel3	74	31	10	22	11.5	30.1667	14.5
Yrdc	5.5	11	3	9	21.5	53.1667	28.75
Zadh2	12	14	2.5	5.5	3.5	16.3333	11.5
Zan	1.5	1	0	0	0	0	0
Zap70	5.5	6.5	0	0	0.5	0.166667	0.25
Zdhhc2	0.5	4	0	19	5	25.8333	20.75
Zdhhc9	20	33	2	6.5	6.5	19.6667	8.5
Zfhx2	1.5	2	6	4.5	4.5	0	0.25
Zfp108	1	0.5	2.5	0	0.5	0.5	0.5
Zfp157	6.5	6	1	3	2	2.66667	2.75
Zfp169	12	12.5	5	7	6.5	1.5	2.25
Zfp251	1.5	1.5	0	4	1	4.83333	4.5
Zfp366	79.5	86.5	11.5	26	25.5	3.66667	7.25
Zfp36l1	322.5	216	93.5	227	147	11.1667	17.75
Zfp69	8	18.5	24	11.5	16	2.16667	3.25
Zfp759	2	1.5	3.5	0.5	0.5	0.5	0.75
Zfp790	5.5	1.5	2	4	2.5	4.16667	4.75
Zfp937	9	2.5	1.5	1.5	1	1.5	2.25
Zgpat	4.5	9.5	11.5	9	7	9.83333	7.5
Zic3	36	56	0	0	0	11.8333	11.75
Zmynd15	0	0.5	10.5	0.5	0	0.833333	0.75
Zswim9	30.5	16.5	3.5	5	3	2.5	2.75

## Sheet: H) Blood-brain barrier genes
Gene	adult_brain_ECs_TPM	p7_brain_ECs_TPM	p7_liver_ECs_TPM	p7_lung_ECs_TPM	p7_kidney_ECs_TPM	control_cultured_ECs_TPM	bcat_cultured_ECs_TPM
Abcb1a	1188.5	510	0.5	28.5	0	41.5	92
Abcc4	46.5	17.5	2	1.5	3.5	28.1667	20.75
Abcg2	281	189.5	23	50	84.5	265	237.25
Abhd2	114.5	83.5	2	15.5	3.5	38.3333	95.5
Ablim1	320	215	2.5	122.5	21	48.1667	73.5
Acacb	9.5	6	2.5	4.5	1	0.666667	1.25
Adam17	76	64	29.5	50	30	20.6667	25.75
Adgrl4	1282.5	844.5	308	216	227	1035.83	1012.5
Ahnak	120.5	28	17	66.5	42.5	184	348
AI467606	15	2.5	0	1	1	7.83333	5.25
Akap2	108	101	47.5	66.5	58	87	137.75
Alas1	104	94.5	11.5	31	12.5	127	136
Aldh1a1	81.5	3	0.5	4.5	0	8.16667	17.75
Aldh2	345	55	91	185	20	75	146.5
Alpl	54	1.5	0	2	5	0.333333	1.5
Ap1s2	41	47.5	12	29	21.5	42.1667	45.5
Apcdd1	415.5	842	0	17	1.5	24.6667	43.75
Arl4a	149	108.5	23.5	9.5	13	20.3333	15.25
Arl6ip5	104	95	28.5	37	53.5	103.5	131.25
Atp10a	38	3	0	1	0.5	9.83333	16.25
Atp11c	16.5	14.5	7.5	8.5	8	7.66667	14.75
AU021092	48	102	4	3	21.5	129.5	102.75
Axin2	49.5	26.5	5.5	9.5	9.5	0	1.5
Bcam	105	15.5	13	36.5	38	117	115
Bche	29	10	0.5	1	0	2.66667	2.5
Bcl2l1	53.5	23	17	32.5	25.5	151.333	139.5
Bhlhe40	77	25	27	19.5	45	32.6667	42
Bnip3l	415.5	411.5	132.5	175	176	132.333	94
Braf	17	10	6	8.5	10.5	7	9.25
Bsg	2669	1847	44	62.5	54	669.667	479.25
C130074G19Rik	154.5	146	11	67.5	42	26	94.25
Capn15	11	6.5	1.5	3.5	2.5	2.83333	2.25
Car4	1175.5	633	0	46.5	1	0.333333	0
Cav2	94.5	33.5	18	60.5	24.5	546.333	425.75
Ccdc141	269	262	0.5	3.5	3.5	10	17.25
Ccdc186	50	29	23.5	30.5	31	5.5	10.5
Ccdc85b	9.5	10	2.5	5.5	4	15.6667	12.5
Ccl21a	138.5	127	0	3	0.5	0	0
Cd2ap	93.5	57	23	44.5	29	21	43.5
Cd320	20	35.5	0.5	4	2.5	22	17.5
Cdkn2b	18	17.5	0.5	1	0	25.8333	27.75
Cdon	67	3.5	0	1	2.5	0.5	1
Ceacam1	64	21.5	9.5	26.5	21.5	3.5	5
Cfh	60.5	5.5	8	1	1	43.8333	51.75
Cgnl1	83	91.5	9	34.5	26.5	33	105
Chmp3	245	165	78	138	114	72.3333	73.25
Chmp5	108	54.5	37.5	41	50	78.3333	68.75
Chst11	8.5	10.5	0	5.5	3	4.33333	11.5
Clec2d	111.5	26.5	39	59	53	9.33333	20
Clic4	80	53	23.5	51	52.5	404.333	412.5
Cobll1	131	92.5	1	12	28	12	12.75
Col4a3bp	111.5	17.5	19	15.5	14.5	20.8333	35.5
Cpt2	22.5	17	2.5	9	10.5	14.3333	11
Cr1l	78	87.5	22	42.5	32.5	159	167.5
Crispld1	13	3.5	0.5	5.5	4	3	3
Ctla2a	393	367.5	68	246.5	157	3789.83	3025.25
Ctsh	123	196	4	15	33	101.167	110
Cxcl12	510	102.5	2.5	57	30.5	246	287
Cyb5r1	9.5	14	4	4	0.5	41.8333	36.75
Ddc	184	68	12.5	1.5	6.5	0	0
Def6	36	81	2	10	4	18.3333	16.75
Degs2	50.5	2	0	0	0	0.5	0
Dock9	46	34.5	8.5	30	14	40	83.75
E330009J07Rik	12	19.5	0	1	2.5	1.66667	2.5
Edn3	22.5	5.5	0	1	0	0	0
Efr3b	53	45.5	1	5.5	8.5	2.66667	6.5
Egflam	16.5	16	0	3	0	0	0.5
Elovl7	26	5	0.5	0	0.5	22	13
Enpp4	12	2.5	4	8.5	3.5	17.3333	21.75
Ephx1	75	7	4	10	14.5	97.5	91
Eps8l2	44.5	6.5	0	2.5	4.5	10.8333	14.75
Esam	1084	965	348.5	765.5	455.5	628.167	532.75
Esyt2	166	72.5	13.5	30	28	114.167	130.25
Extl3	122	64.5	2	15.5	10.5	21.5	32.75
Faim	82	130.5	17.5	27.5	27.5	27	26.75
Fam129a	15	35.5	3	3.5	0.5	22.3333	20
Fam13a	10.5	29.5	0	6.5	1	1.5	0.5
Fam13c	37.5	12.5	0	6.5	4.5	1.83333	2.75
Fam189a2	13.5	9.5	5	4.5	2	3	1.5
Fam220a	22	6.5	4.5	7	7	21	22
Far2	12.5	12	0	0	0	9	8
Flt1	1154.5	537.5	107	72	104	64	116.75
Flvcr2	15	31	0	0	0	2.16667	1.75
Fmo5	13	4.5	2.5	3.5	1.5	2.66667	1.5
Fn1	1268.5	1989	12	313.5	84.5	779.333	1346
Focad	9.5	11	2	5	3.5	5	4.25
Foxc1	20	16	0.5	1	1	16.5	17
Foxf2	36	49	0	1	0	32.5	26
Foxl2	7	4	0	0	0	5.83333	2.25
Foxq1	26	25.5	0	0	0	2	3
Fry	134	75.5	2	12.5	10	12.6667	18.25
Fut8	92	52.5	4.5	12.5	18	12	15.5
Fxyd5	107.5	65.5	27	41.5	52	305.333	284.75
Fyco1	31.5	17.5	6	7	5	2.83333	4.75
Gas6	44.5	10	13	10.5	21	98.6667	133.25
Gbe1	39	20	3.5	6	5	19.5	14.75
Ginm1	126.5	88.5	32.5	47	44.5	91.1667	71.5
Gkn3	49	4	0	0.5	0	0	0
Gltp	162.5	84	34	113	34.5	81.3333	41.75
Glul	537	355.5	143	249.5	106.5	84.1667	162.25
Gm28048	24.5	14	9.5	3.5	12.5	3.16667	2.75
Gpcpd1	316.5	242.5	28	30.5	16	30.1667	33.75
Gpd2	148	247.5	18.5	40	86.5	23.3333	29
Gpr108	12.5	13	3	8	7.5	20.1667	14
Gpr146	26.5	7	5	6.5	5	14.3333	14.25
Gpr160	43.5	2	1	0	1	0.333333	0.5
Gpr4	26.5	22	5.5	2.5	7	41.3333	20.5
Gpx1	176	120	67.5	71.5	105.5	1169.17	517.25
Grap	88.5	86.5	34.5	45.5	22.5	145.5	125.5
Grb14	48.5	45.5	0	8	6.5	4.16667	4.5
Gstm7	26	24	0	2	4.5	3	3.5
Hadh	26	42.5	11.5	16	16	23.3333	21
Hipk3	39	22	9.5	20.5	15.5	43.8333	59.75
Hmgcs2	62.5	76.5	0.5	0.5	2	0.166667	0
Hprt	77	97.5	30	41.5	40	163.333	123
Hspb1	261	24.5	1.5	18	25.5	1619.83	1147.25
Hyal1	27.5	6	4	8	5	2.66667	4.25
Id1	212.5	66	34.5	81.5	32	137	116.25
Ifnar1	105.5	97.5	27	36	62	71.1667	123.25
Ifnar2	61.5	50	23	19.5	29.5	95	85.25
Igf1r	140.5	76	7.5	22	12	19.1667	25.75
Il10rb	79.5	26.5	21	16	25.5	31.8333	26.25
Ildr2	9	40.5	0.5	2	0.5	7.5	12
Ism1	9	5	0	1.5	0	7.66667	13.25
Isyna1	155.5	306	5	24	74.5	7.33333	4.5
Itih5	62.5	3	0	0.5	0	1.83333	8.5
Itm2a	1785.5	659.5	1	9	9.5	134	101.75
Jcad	241	113.5	15.5	56.5	28.5	88.5	148
Kbtbd11	67	131.5	0	0	4.5	1.16667	3.75
Kif1c	44.5	43	13.5	27	19	51.6667	120.5
Kitl	100	61	1.5	56.5	40	101	170.5
Klf13	21.5	20	6.5	15	11.5	57.6667	30.5
Layn	49.5	11.5	9	14.5	24	13.5	19.75
Ldlrad3	27.5	24	0	4	3.5	6.5	6.75
Lef1	126	90	1	0	1	9.16667	7.25
Lmo7	70	14.5	7	20.5	19.5	21.1667	54.25
Lrp8	56	236	1	0.5	0.5	4.5	6.5
Lsr	118.5	80	0	1	1.5	29.6667	28
Ly6a	1231	138	40	186.5	264.5	1455.17	1637.75
Ly6c1	2433	453.5	1	109	284.5	515.833	646.5
Ly75	12.5	39.5	0	0	0	33.8333	44.5
Maoa	78	64	3	27.5	8.5	31.8333	41
Maob	15	2.5	0	3	0	2.83333	4.5
Map3k1	53	39.5	14.5	16.5	25	2.5	4.5
Mcur1	11	8	2.5	7.5	4	13.3333	11
Mfsd2a	261	750.5	0	0	0	2	1.5
Mif4gd	53	66	6.5	13	8	15.8333	11
Mindy1	86	61	27	43	42.5	30.8333	26.25
Mospd1	37.5	46.5	13	13.5	10.5	39	36.5
Mrtfb	40	28.5	5.5	16	20	12.8333	21.5
Mtmr6	46	48	16.5	19.5	14.5	38.8333	42.75
Mtpap	29	25	11.5	10.5	9.5	15.6667	14.75
Myrip	12.5	1.5	0	2.5	0	5.66667	6
Nampt	163	599.5	20.5	26	51.5	23.6667	26.25
Ndnf	52.5	13.5	0	5	0	1	3.75
Ndrg1	156.5	4	31	7	67.5	143	114
Nomo1	31.5	96.5	8	6.5	10	31.5	43.25
Notum	48.5	79	0.5	0	1.5	0	0
Nr3c1	39	25.5	12.5	23	17	19.5	22.75
Ocln	164	100.5	0	31.5	6	62.1667	55.25
Paqr7	13.5	11	2.5	3.5	0.5	20.3333	19.5
Parvb	100	81	17.5	70	24.5	9.16667	12
Pcp4l1	331	25.5	8	1.5	1	15.6667	32.5
Pdxk	34	16.5	0.5	1	0	6.83333	6
Peli1	26	19.5	8.5	15.5	10.5	13.5	12.75
Pglyrp1	224.5	236	1	0.5	0.5	9.5	5.75
Phactr4	106.5	102.5	32	57.5	50.5	11.8333	17.25
Pik3c2a	92.5	54.5	36	31	40.5	81.6667	119
Pir	17	6.5	0	2.5	5	12.5	11.75
Plcb1	26	7	4	16.5	14	4	7
Plpp6	18.5	13	1	2	2.5	27.8333	22.5
Pltp	844.5	417	1	90.5	15.5	47.3333	33.25
Pmaip1	80	32	0	4	0	102.333	56.25
Pnpla2	42.5	33	15.5	24.5	19	154.833	86
Polk	65	6	10	4.5	2.5	14.8333	18
Ppm1h	21.5	31.5	1.5	6	7.5	5.83333	7.5
Ppp3cc	15.5	6.5	2	3	1	15.5	18.75
Prom1	685.5	127.5	2	15.5	30	98.5	101.75
Proser2	25.5	21.5	0	0	1	14.3333	7.5
Ptprg	484	373.5	17.5	194	100.5	32.6667	55.25
Ptprr	20	10	0	0	1	1.5	0.5
Rab11fip1	37	17	0	0.5	1	4.16667	5.25
Reck	13	4	0.5	2.5	3	5.33333	10.5
Rnf144b	19.5	8.5	3	2.5	1	10.5	32.75
Rp9	18	15.5	7.5	12	10	24.5	17.25
Rpl38	287	399.5	58.5	58.5	36.5	1201.83	993.5
Rras	84.5	54.5	37.5	41.5	25.5	207.667	104.25
Rras2	23	37	9	14.5	7	139.167	112
Sdf4	91.5	64.5	39	54	50	114.667	87.5
Sema3c	339.5	17	0	214	4	8.5	11.5
Sema7a	128.5	106.5	0	31	12	66.1667	158.75
Serinc5	31	35	11.5	12.5	9	24.5	32
Serpina1b	18.5	3	3	1	0.5	0	0
Serpinb9	24.5	9	3	13.5	14	10	7.5
Sgms1	214.5	42	28	20	27	110.833	135
Sgms2	14.5	10	0	0	0	53.6667	75.75
Sgpp2	13.5	2.5	0	0	0	0	0
Shld1	10	10.5	1.5	1	3	6	4.25
Shroom1	49	42	0	5.5	0	8.16667	5.25
Shroom4	23.5	24.5	5	15.5	9	19.5	42.75
Slc16a1	197.5	441.5	3	1	2	26.1667	18.75
Slc16a4	65	42.5	0.5	0	1.5	5.16667	8.5
Slc16a9	11.5	9.5	0	4.5	0	12	11.75
Slc19a3	39	10.5	0	0	0	1.33333	1.25
Slc1a1	68.5	23	0	2	1	48.8333	38.5
Slc22a8	181	238.5	0	0	1	0	0
Slc2a1	1702	649.5	3	4.5	10	423.333	290
Slc30a1	220.5	129	9	24	13.5	21.6667	37.75
Slc35f2	69	86.5	0	0.5	1	4.33333	4.25
Slc38a3	237	298	0	1.5	0.5	2.16667	1.25
Slc38a5	81	279.5	0	2.5	0	1.5	0.5
Slc39a10	498.5	412.5	11	28.5	20	9.16667	9.5
Slc3a2	2072	3575.5	145	182.5	159.5	168.667	101.5
Slc40a1	320	449	65.5	0.5	21	19.6667	32.75
Slc46a3	14.5	27.5	2	2	0.5	14.5	16.75
Slc52a2	7	12	0.5	1	0.5	9.5	6.5
Slc52a3	8	4	0	0	1	8	7.5
Slc5a6	21	48	1	3	6	2.33333	2
Slc6a6	420.5	196	10.5	135	124	14.5	14.25
Slc7a1	107	279	2	5	11	27.1667	21.5
Slc7a3	23	29.5	0	0	0.5	1	0.5
Slc7a5	255	548.5	12	1.5	4	112	46.75
Slco1c1	1734	1687.5	0.5	1	0.5	3.33333	3.25
Slco2b1	48	119	0	1	2	17	8.75
Sos2	29	21	8	17.5	10.5	7.5	9.5
Sparc	1850	1997.5	649	1099	1159.5	2994.17	2100.5
Specc1l	24	23	5.5	14	13	10.3333	17
Spock2	541.5	546.5	0	2.5	1.5	1.33333	4
Spr	43	16	5.5	12.5	11	28.6667	21.75
Sptbn1	849	419.5	129	382.5	298	101.667	294
Srarp	40	8	0	0	0	0	0
Srgn	519.5	265	61	313	251.5	369.167	344.25
St3gal6	275	182.5	23.5	58.5	38	56.8333	47.25
St6galnac2	26	19	0.5	13.5	0	12.3333	17.25
St6galnac3	47.5	11	11	22	12	7.33333	7.25
St8sia4	37.5	30	0	20.5	3.5	30.3333	49.5
Steap3	7	10.5	0	0.5	0	4	2.25
Stk38	75.5	48	17	54.5	22	11.5	12.5
Stra6	14	42	0	0	0	0	0
Taf9b	23.5	10	5	10.5	10	10.6667	10.25
Tbl1xr1	97.5	67.5	2	42.5	60.5	17.1667	26.25
Tbx1	9	10.5	0	0	0	30.8333	26.25
Tdrp	152	195	22.5	10	17	13	13.75
Tfeb	17.5	12	5	5	5.5	7.83333	5.75
Tfrc	167	410	8.5	6	9.5	50.5	70
Tgfa	11.5	20	3	0	0.5	9.5	12
Tmem123	70	60.5	10.5	26.5	22	116.5	98.75
Tmem184b	113.5	112	23	77.5	46.5	102.667	59
Tmem204	93	49	27	41.5	19.5	44.1667	42.5
Tmem245	11	6	2.5	5	4.5	31.8333	23.75
Tmem98	11	14.5	3.5	7.5	5.5	36.3333	18
Tmsb4x	2923	5106	617	983	1761.5	14162.8	9513
Tmtc1	13	6	0	1	4.5	4	7.25
Tnfrsf19	30.5	34	0	3	1.5	4.5	7
Tns1	187.5	35	49	48.5	55.5	80	119.5
Tob1	92	19	6.5	19.5	29.5	28.3333	20
Tpd52	64.5	31.5	12	4.5	15.5	113.667	98.5
Tpd52l1	13.5	23.5	0	0.5	0.5	17.5	15.75
Tprgl	111	85	41.5	60	59	172.333	93.25
Tsc22d1	594	699	71	126.5	261	120.667	113.5
Tspan13	206	142.5	11	151	13	105.167	68.25
Ttyh2	24	63.5	2	1	0	11.3333	10
Ubxn2a	26	33.5	9.5	9.5	10	32.3333	42.75
Usp53	45.5	34	3	9	4.5	12.8333	16.75
Utrn	192.5	59.5	30	60.5	60	20.8333	47.5
Vamp3	77.5	48	27.5	33	34.5	147.167	124.25
Vmac	18.5	7.5	4	5	5	9.66667	6.5
Vwa1	115	146	0	1	5	232.667	214.75
Wfdc1	67.5	21.5	0	5.5	0.5	34	53.25
Wwtr1	56.5	100.5	14	38	30.5	143	152.25
Xlr	10.5	10	0.5	0.5	0	17.8333	20.75
Ypel3	74	31	10	22	11.5	30.1667	14.5
Zfp157	6.5	6	1	3	2	2.66667	2.75
Zfp169	12	12.5	5	7	6.5	1.5	2.25
Zfp366	79.5	86.5	11.5	26	25.5	3.66667	7.25
Zfp36l1	322.5	216	93.5	227	147	11.1667	17.75
Zfp790	5.5	1.5	2	4	2.5	4.16667	4.75
Zfp937	9	2.5	1.5	1.5	1	1.5	2.25
Zswim9	30.5	16.5	3.5	5	3	2.5	2.75

## Sheet: I) BBB genes lost on culture
Gene	adult_brain_ECs_TPM	p7_brain_ECs_TPM	p7_liver_ECs_TPM	p7_lung_ECs_TPM	p7_kidney_ECs_TPM	control_cultured_ECs_TPM	bcat_cultured_ECs_TPM
Abcb1a	1188.5	510	0.5	28.5	0	41.5	92
Ablim1	320	215	2.5	122.5	21	48.1667	73.5
Acacb	9.5	6	2.5	4.5	1	0.666667	1.25
Adam17	76	64	29.5	50	30	20.6667	25.75
Aldh1a1	81.5	3	0.5	4.5	0	8.16667	17.75
Aldh2	345	55	91	185	20	75	146.5
Alpl	54	1.5	0	2	5	0.333333	1.5
Apcdd1	415.5	842	0	17	1.5	24.6667	43.75
Arl4a	149	108.5	23.5	9.5	13	20.3333	15.25
Atp10a	38	3	0	1	0.5	9.83333	16.25
Atp11c	16.5	14.5	7.5	8.5	8	7.66667	14.75
Axin2	49.5	26.5	5.5	9.5	9.5	0	1.5
Bche	29	10	0.5	1	0	2.66667	2.5
Bhlhe40	77	25	27	19.5	45	32.6667	42
Bnip3l	415.5	411.5	132.5	175	176	132.333	94
Braf	17	10	6	8.5	10.5	7	9.25
Bsg	2669	1847	44	62.5	54	669.667	479.25
C130074G19Rik	154.5	146	11	67.5	42	26	94.25
Capn15	11	6.5	1.5	3.5	2.5	2.83333	2.25
Car4	1175.5	633	0	46.5	1	0.333333	0
Ccdc141	269	262	0.5	3.5	3.5	10	17.25
Ccdc186	50	29	23.5	30.5	31	5.5	10.5
Ccl21a	138.5	127	0	3	0.5	0	0
Cd2ap	93.5	57	23	44.5	29	21	43.5
Cdon	67	3.5	0	1	2.5	0.5	1
Ceacam1	64	21.5	9.5	26.5	21.5	3.5	5
Cgnl1	83	91.5	9	34.5	26.5	33	105
Chmp3	245	165	78	138	114	72.3333	73.25
Chmp5	108	54.5	37.5	41	50	78.3333	68.75
Clec2d	111.5	26.5	39	59	53	9.33333	20
Cobll1	131	92.5	1	12	28	12	12.75
Col4a3bp	111.5	17.5	19	15.5	14.5	20.8333	35.5
Cpt2	22.5	17	2.5	9	10.5	14.3333	11
Crispld1	13	3.5	0.5	5.5	4	3	3
Cxcl12	510	102.5	2.5	57	30.5	246	287
Ddc	184	68	12.5	1.5	6.5	0	0
Def6	36	81	2	10	4	18.3333	16.75
Degs2	50.5	2	0	0	0	0.5	0
E330009J07Rik	12	19.5	0	1	2.5	1.66667	2.5
Edn3	22.5	5.5	0	1	0	0	0
Efr3b	53	45.5	1	5.5	8.5	2.66667	6.5
Egflam	16.5	16	0	3	0	0	0.5
Eps8l2	44.5	6.5	0	2.5	4.5	10.8333	14.75
Esam	1084	965	348.5	765.5	455.5	628.167	532.75
Extl3	122	64.5	2	15.5	10.5	21.5	32.75
Faim	82	130.5	17.5	27.5	27.5	27	26.75
Fam13a	10.5	29.5	0	6.5	1	1.5	0.5
Fam13c	37.5	12.5	0	6.5	4.5	1.83333	2.75
Fam189a2	13.5	9.5	5	4.5	2	3	1.5
Flt1	1154.5	537.5	107	72	104	64	116.75
Flvcr2	15	31	0	0	0	2.16667	1.75
Fmo5	13	4.5	2.5	3.5	1.5	2.66667	1.5
Focad	9.5	11	2	5	3.5	5	4.25
Foxq1	26	25.5	0	0	0	2	3
Fry	134	75.5	2	12.5	10	12.6667	18.25
Fut8	92	52.5	4.5	12.5	18	12	15.5
Fyco1	31.5	17.5	6	7	5	2.83333	4.75
Gbe1	39	20	3.5	6	5	19.5	14.75
Ginm1	126.5	88.5	32.5	47	44.5	91.1667	71.5
Gkn3	49	4	0	0.5	0	0	0
Gltp	162.5	84	34	113	34.5	81.3333	41.75
Glul	537	355.5	143	249.5	106.5	84.1667	162.25
Gm28048	24.5	14	9.5	3.5	12.5	3.16667	2.75
Gpcpd1	316.5	242.5	28	30.5	16	30.1667	33.75
Gpd2	148	247.5	18.5	40	86.5	23.3333	29
Gpr146	26.5	7	5	6.5	5	14.3333	14.25
Gpr160	43.5	2	1	0	1	0.333333	0.5
Grb14	48.5	45.5	0	8	6.5	4.16667	4.5
Gstm7	26	24	0	2	4.5	3	3.5
Hmgcs2	62.5	76.5	0.5	0.5	2	0.166667	0
Hyal1	27.5	6	4	8	5	2.66667	4.25
Id1	212.5	66	34.5	81.5	32	137	116.25
Ifnar1	105.5	97.5	27	36	62	71.1667	123.25
Igf1r	140.5	76	7.5	22	12	19.1667	25.75
Il10rb	79.5	26.5	21	16	25.5	31.8333	26.25
Isyna1	155.5	306	5	24	74.5	7.33333	4.5
Itih5	62.5	3	0	0.5	0	1.83333	8.5
Itm2a	1785.5	659.5	1	9	9.5	134	101.75
Jcad	241	113.5	15.5	56.5	28.5	88.5	148
Kbtbd11	67	131.5	0	0	4.5	1.16667	3.75
Layn	49.5	11.5	9	14.5	24	13.5	19.75
Ldlrad3	27.5	24	0	4	3.5	6.5	6.75
Lef1	126	90	1	0	1	9.16667	7.25
Lmo7	70	14.5	7	20.5	19.5	21.1667	54.25
Lrp8	56	236	1	0.5	0.5	4.5	6.5
Lsr	118.5	80	0	1	1.5	29.6667	28
Ly6c1	2433	453.5	1	109	284.5	515.833	646.5
Maoa	78	64	3	27.5	8.5	31.8333	41
Maob	15	2.5	0	3	0	2.83333	4.5
Map3k1	53	39.5	14.5	16.5	25	2.5	4.5
Mfsd2a	261	750.5	0	0	0	2	1.5
Mif4gd	53	66	6.5	13	8	15.8333	11
Mindy1	86	61	27	43	42.5	30.8333	26.25
Mrtfb	40	28.5	5.5	16	20	12.8333	21.5
Mtpap	29	25	11.5	10.5	9.5	15.6667	14.75
Myrip	12.5	1.5	0	2.5	0	5.66667	6
Nampt	163	599.5	20.5	26	51.5	23.6667	26.25
Ndnf	52.5	13.5	0	5	0	1	3.75
Notum	48.5	79	0.5	0	1.5	0	0
Nr3c1	39	25.5	12.5	23	17	19.5	22.75
Ocln	164	100.5	0	31.5	6	62.1667	55.25
Parvb	100	81	17.5	70	24.5	9.16667	12
Pcp4l1	331	25.5	8	1.5	1	15.6667	32.5
Pdxk	34	16.5	0.5	1	0	6.83333	6
Peli1	26	19.5	8.5	15.5	10.5	13.5	12.75
Pglyrp1	224.5	236	1	0.5	0.5	9.5	5.75
Phactr4	106.5	102.5	32	57.5	50.5	11.8333	17.25
Pir	17	6.5	0	2.5	5	12.5	11.75
Plcb1	26	7	4	16.5	14	4	7
Pltp	844.5	417	1	90.5	15.5	47.3333	33.25
Polk	65	6	10	4.5	2.5	14.8333	18
Ppm1h	21.5	31.5	1.5	6	7.5	5.83333	7.5
Prom1	685.5	127.5	2	15.5	30	98.5	101.75
Ptprg	484	373.5	17.5	194	100.5	32.6667	55.25
Ptprr	20	10	0	0	1	1.5	0.5
Rab11fip1	37	17	0	0.5	1	4.16667	5.25
Reck	13	4	0.5	2.5	3	5.33333	10.5
Sema3c	339.5	17	0	214	4	8.5	11.5
Sema7a	128.5	106.5	0	31	12	66.1667	158.75
Serinc5	31	35	11.5	12.5	9	24.5	32
Serpina1b	18.5	3	3	1	0.5	0	0
Serpinb9	24.5	9	3	13.5	14	10	7.5
Sgms1	214.5	42	28	20	27	110.833	135
Sgpp2	13.5	2.5	0	0	0	0	0
Shld1	10	10.5	1.5	1	3	6	4.25
Shroom1	49	42	0	5.5	0	8.16667	5.25
Slc16a1	197.5	441.5	3	1	2	26.1667	18.75
Slc16a4	65	42.5	0.5	0	1.5	5.16667	8.5
Slc19a3	39	10.5	0	0	0	1.33333	1.25
Slc1a1	68.5	23	0	2	1	48.8333	38.5
Slc22a8	181	238.5	0	0	1	0	0
Slc2a1	1702	649.5	3	4.5	10	423.333	290
Slc30a1	220.5	129	9	24	13.5	21.6667	37.75
Slc35f2	69	86.5	0	0.5	1	4.33333	4.25
Slc38a3	237	298	0	1.5	0.5	2.16667	1.25
Slc38a5	81	279.5	0	2.5	0	1.5	0.5
Slc39a10	498.5	412.5	11	28.5	20	9.16667	9.5
Slc3a2	2072	3575.5	145	182.5	159.5	168.667	101.5
Slc40a1	320	449	65.5	0.5	21	19.6667	32.75
Slc5a6	21	48	1	3	6	2.33333	2
Slc6a6	420.5	196	10.5	135	124	14.5	14.25
Slc7a1	107	279	2	5	11	27.1667	21.5
Slc7a3	23	29.5	0	0	0.5	1	0.5
Slc7a5	255	548.5	12	1.5	4	112	46.75
Slco1c1	1734	1687.5	0.5	1	0.5	3.33333	3.25
Slco2b1	48	119	0	1	2	17	8.75
Sos2	29	21	8	17.5	10.5	7.5	9.5
Specc1l	24	23	5.5	14	13	10.3333	17
Spock2	541.5	546.5	0	2.5	1.5	1.33333	4
Spr	43	16	5.5	12.5	11	28.6667	21.75
Sptbn1	849	419.5	129	382.5	298	101.667	294
Srarp	40	8	0	0	0	0	0
St3gal6	275	182.5	23.5	58.5	38	56.8333	47.25
St6galnac2	26	19	0.5	13.5	0	12.3333	17.25
St6galnac3	47.5	11	11	22	12	7.33333	7.25
Stk38	75.5	48	17	54.5	22	11.5	12.5
Stra6	14	42	0	0	0	0	0
Taf9b	23.5	10	5	10.5	10	10.6667	10.25
Tbl1xr1	97.5	67.5	2	42.5	60.5	17.1667	26.25
Tdrp	152	195	22.5	10	17	13	13.75
Tfeb	17.5	12	5	5	5.5	7.83333	5.75
Tmem204	93	49	27	41.5	19.5	44.1667	42.5
Tmtc1	13	6	0	1	4.5	4	7.25
Tnfrsf19	30.5	34	0	3	1.5	4.5	7
Tns1	187.5	35	49	48.5	55.5	80	119.5
Tob1	92	19	6.5	19.5	29.5	28.3333	20
Tsc22d1	594	699	71	126.5	261	120.667	113.5
Tspan13	206	142.5	11	151	13	105.167	68.25
Ttyh2	24	63.5	2	1	0	11.3333	10
Usp53	45.5	34	3	9	4.5	12.8333	16.75
Utrn	192.5	59.5	30	60.5	60	20.8333	47.5
Vmac	18.5	7.5	4	5	5	9.66667	6.5
Wfdc1	67.5	21.5	0	5.5	0.5	34	53.25
Ypel3	74	31	10	22	11.5	30.1667	14.5
Zfp157	6.5	6	1	3	2	2.66667	2.75
Zfp169	12	12.5	5	7	6.5	1.5	2.25
Zfp366	79.5	86.5	11.5	26	25.5	3.66667	7.25
Zfp36l1	322.5	216	93.5	227	147	11.1667	17.75
Zfp790	5.5	1.5	2	4	2.5	4.16667	4.75
Zfp937	9	2.5	1.5	1.5	1	1.5	2.25
Zswim9	30.5	16.5	3.5	5	3	2.5	2.75
