# Supplementary material for: A genome-wide view of the de-differentiation of central nervous system endothelial cells in culture
Source: eLife. 2020 Jan 8;9:e51276. doi: 10.7554/eLife.51276 (PMC6948952; doi:10.7554/eLife.51276)
Supplement: Supplementary file 2. — (A) Differential ATAC-seq peaks in acutely isolated adult brain ECs when compared to cultured brain ECs. (B) Differential ATAC-seq peaks in cultured brain ECs when compared to acutely isolated adult brain ECs. [file elife-51276-supp2.xlsx]

## Sheet: A) Adult brain EC unique peaks
Chr	Start	End	log_of_mean_reads_in_cultured_ECs	log_of_mean_reads_in_adult_brain_ECs	Fold	p-value	FDR
chr5	8590249	8590912	3.85	10.47	-6.62	9.19e-92	9.38e-87
chrY	6013637	6014586	0.63	9	-8.37	2.11e-87	1.08e-82
chr6	66412935	66413440	2.48	9.73	-7.25	1.34e-85	4.55e-81
chr17	61534572	61535317	3.89	10.07	-6.18	3.01e-84	7.68e-80
chr1	7076423	7077096	4.08	10.35	-6.28	6.04e-83	1.23e-78
chr13	30893966	30894724	5.09	11.13	-6.04	1.55e-82	2.63e-78
chr13	47242706	47243700	5.12	11.2	-6.08	2.36e-81	3.43e-77
chrY	7027390	7028170	1.58	10	-8.41	4.8e-81	6.12e-77
chrY	7031258	7031897	1.17	9.31	-8.14	2.36e-80	2.68e-76
chr18	54071992	54072845	5.66	11.19	-5.53	3.66e-80	3.74e-76
chrY	6817828	6818212	0.83	8.72	-7.89	1.37e-78	1.27e-74
chrY	7026833	7027157	0.95	8.73	-7.78	4.78e-77	4.06e-73
chr16	32512908	32513937	5.41	11.36	-5.95	1.68e-76	1.32e-72
chr6	36800419	36800994	4.26	10.53	-6.27	6.75e-76	4.92e-72
chr4	23349802	23350548	3.06	9.41	-6.35	1.32e-75	8.99e-72
chrY	6726027	6726419	0.55	8.44	-7.89	2.97e-74	1.89e-70
chr6	8467244	8468287	5.46	11.23	-5.77	8.36e-74	5.02e-70
chr10	79699753	79700214	4.15	10.38	-6.23	1.69e-73	9.58e-70
chr6	129179336	129180048	4.46	10.22	-5.76	1.53e-72	8.21e-69
chrY	6726724	6727155	0.89	8.57	-7.68	9.08e-72	4.63e-68
chrY	6678994	6679300	0.47	8.17	-7.7	1.28e-71	6.2e-68
chr13	26700598	26701904	6.22	11.58	-5.36	1.65e-71	7.67e-68
chr1	166185037	166185917	4.86	10.32	-5.46	7.48e-70	3.32e-66
chr13	103129147	103129924	4.62	10.87	-6.24	2.38e-69	1.01e-65
chr4	57834037	57834761	5.96	10.58	-4.62	5.61e-69	2.29e-65
chr3	21165917	21166634	3.96	9.96	-6	9.25e-69	3.63e-65
chrY	6809500	6809810	1.16	8.29	-7.13	4.47e-68	1.69e-64
chr4	75579908	75580899	4.03	9.3	-5.27	7.75e-68	2.82e-64
chrY	6693925	6694434	0.67	8.12	-7.45	1.43e-67	5.02e-64
chrY	6529147	6529505	0.97	8.02	-7.06	2.78e-67	9.46e-64
chr10	104705150	104706126	4.07	10.17	-6.1	4.19e-67	1.38e-63
chrY	6752074	6752449	0.99	8.2	-7.21	4.33e-67	1.38e-63
chr6	141523553	141524727	5.5	10.91	-5.4	4.64e-67	1.43e-63
chr4	86721683	86722507	4.53	10.32	-5.8	5.32e-67	1.6e-63
chr3	37760936	37761338	3.04	8.74	-5.7	5.04e-66	1.47e-62
chr1	90126687	90127527	5.34	10.74	-5.4	6.84e-66	1.94e-62
chrY	6813854	6814127	0.6	7.85	-7.26	7.42e-66	2.05e-62
chr4	55689436	55690065	4.16	9.26	-5.1	2.15e-65	5.78e-62
chrY	5844190	5844958	1.56	8.44	-6.89	7.77e-65	2.03e-61
chr1	154029357	154030023	5.24	10.28	-5.04	9.91e-65	2.53e-61
chrY	6910877	6911306	0.74	7.9	-7.16	1.03e-64	2.56e-61
chrY	6807987	6808464	1.69	8.53	-6.83	1.94e-63	4.71e-60
chrY	6522960	6523255	1.02	7.85	-6.83	2.08e-63	4.94e-60
chrY	6695034	6695460	1.02	8.03	-7	4.68e-63	1.08e-59
chr8	80907921	80908874	5.53	10.19	-4.67	6.25e-63	1.42e-59
chrY	6705681	6706107	1.35	8.26	-6.91	1.05e-62	2.32e-59
chr19	28886957	28887735	4.84	9.88	-5.04	1.59e-62	3.45e-59
chr13	44208975	44209781	5.2	10.72	-5.52	2.74e-62	5.82e-59
chr9	32561093	32561977	5.57	10.52	-4.95	3.34e-62	6.95e-59
chrY	6805975	6806320	1.42	8.47	-7.05	4.16e-62	8.49e-59
chr14	11702685	11703638	6.06	11.01	-4.95	7.64e-62	1.53e-58
chrY	6801218	6801502	0.62	7.74	-7.12	9.11e-62	1.79e-58
chr19	34327885	34328677	4.92	10.24	-5.32	1.6e-61	3.08e-58
chr4	89431281	89432033	5.76	11.04	-5.28	2.62e-61	4.96e-58
chr9	50721064	50721601	4.58	9.88	-5.31	2.71e-61	5.02e-58
chr3	116398889	116399655	3.33	8.61	-5.27	7.28e-61	1.31e-57
chrX	114336027	114336809	4.13	9.81	-5.69	7.32e-61	1.31e-57
chr13	93686988	93687876	5.09	10.54	-5.46	3.41e-60	5.99e-57
chr8	87831086	87832274	6.66	11.01	-4.35	4.13e-60	7.15e-57
chrY	6759070	6759648	1.07	8.23	-7.16	7.37e-60	1.24e-56
chr4	123619126	123619659	2.87	8.93	-6.05	7.4e-60	1.24e-56
chr4	31413009	31413687	4.57	9.81	-5.24	1.18e-59	1.93e-56
chr10	94703285	94703952	3.36	8.64	-5.27	1.19e-59	1.93e-56
chr2	122617038	122617922	4.55	10.38	-5.83	2.53e-59	4.03e-56
chr7	127250915	127251553	3.58	9.19	-5.61	3.25e-59	5.09e-56
chr11	30521649	30522701	4.14	9.24	-5.1	3.8e-59	5.87e-56
chr9	110058831	110059373	3.74	9.37	-5.63	4.42e-59	6.74e-56
chr2	84302005	84302749	3.11	10.1	-6.99	4.78e-59	7.16e-56
chr13	96500793	96501403	4.14	9.62	-5.48	5.69e-59	8.41e-56
chrY	6789804	6790090	0.81	7.64	-6.83	1.02e-58	1.48e-55
chrY	6755389	6755683	1.23	8.03	-6.81	1.1e-58	1.57e-55
chr3	104573175	104574215	5.36	10.33	-4.96	1.7e-58	2.41e-55
chr13	97579908	97580889	6.43	11.25	-4.82	2.33e-58	3.26e-55
chr15	67102175	67103199	6.18	10.84	-4.66	4.87e-58	6.72e-55
chr6	66360773	66361956	7.73	12.03	-4.3	4.96e-58	6.75e-55
chr5	17496400	17497310	4.79	11.06	-6.27	5.68e-58	7.56e-55
chr1	44892284	44892941	4.92	10.08	-5.15	5.71e-58	7.56e-55
chr6	101217738	101218230	4.34	9.49	-5.16	6.69e-58	8.75e-55
chr1	39362208	39362940	5.47	9.94	-4.47	7.77e-58	1e-54
chr7	30969058	30969690	5.87	11.32	-5.45	1.32e-57	1.69e-54
chrY	6773128	6773615	1.1	7.9	-6.8	1.34e-57	1.69e-54
chr10	23080754	23081654	7.14	11.24	-4.1	1.49e-57	1.86e-54
chr18	49628783	49629566	4.4	9.37	-4.96	2.68e-57	3.29e-54
chr19	34788882	34789510	3.74	9.14	-5.41	3.18e-57	3.86e-54
chrY	6696373	6696605	0.3	7.31	-7.01	4.23e-57	5.08e-54
chr3	73673159	73673943	6.43	11.86	-5.43	4.36e-57	5.17e-54
chr6	117661192	117661890	3.68	9.24	-5.56	7.08e-57	8.31e-54
chr5	147848830	147849907	5.13	10.27	-5.14	7.27e-57	8.41e-54
chrY	6730775	6731028	0.89	7.69	-6.8	7.34e-57	8.41e-54
chr2	110319960	110320356	3.14	8.51	-5.37	8.45e-57	9.52e-54
chr5	44083687	44084303	4.31	9.41	-5.11	8.49e-57	9.52e-54
chrX	58094404	58094940	3.08	9.01	-5.93	1.21e-56	1.34e-53
chr12	15749808	15750252	2.88	8.58	-5.69	1.72e-56	1.89e-53
chr9	72084070	72084824	4.01	9.71	-5.7	1.94e-56	2.1e-53
chr5	148392676	148393379	5.49	10.46	-4.97	2.32e-56	2.49e-53
chrY	6826248	6826501	0.67	7.41	-6.74	2.49e-56	2.64e-53
chr15	9222418	9222884	0.64	7.49	-6.85	3.35e-56	3.52e-53
chr11	76412994	76413784	5.64	10.38	-4.74	1.16e-55	1.21e-52
chrY	6821398	6822020	2.38	9.14	-6.76	1.39e-55	1.43e-52
chr8	64871561	64872438	6.84	10.79	-3.95	1.75e-55	1.79e-52
chr2	71770305	71770926	3.33	9.12	-5.8	3.28e-55	3.32e-52
chrY	6592938	6593907	1.7	8.2	-6.5	7.08e-55	7.08e-52
chr14	12062419	12063179	4.56	10.12	-5.56	7.86e-55	7.79e-52
chrY	7010809	7011105	0.39	7.27	-6.89	1.03e-54	1.01e-51
chrY	6836605	6836923	0.39	7.24	-6.85	1.06e-54	1.03e-51
chr11	62826137	62826707	4.15	9.26	-5.1	1.34e-54	1.29e-51
chr1	40614388	40615461	6.33	10.43	-4.1	1.8e-54	1.71e-51
chr19	20566151	20567000	4.76	10.08	-5.31	2.18e-54	2.06e-51
chr2	57243854	57244486	5.13	10.01	-4.88	2.33e-54	2.18e-51
chr13	30824628	30825395	3.86	10	-6.13	2.35e-54	2.18e-51
chr10	100164407	100165196	4.9	10.76	-5.86	2.59e-54	2.38e-51
chrY	6744507	6744730	0.7	7.37	-6.68	2.78e-54	2.53e-51
chrY	5913014	5913375	0.63	7.44	-6.81	3.17e-54	2.86e-51
chr12	32756263	32757287	5.36	10.91	-5.54	3.56e-54	3.19e-51
chrY	6753564	6754063	1.81	8.25	-6.44	3.64e-54	3.23e-51
chr12	40026888	40027727	6.05	10.71	-4.66	5.04e-54	4.43e-51
chr10	122656489	122657322	3.66	9.08	-5.41	6.98e-54	6.09e-51
chr6	107851894	107852586	4.73	9.97	-5.24	8.43e-54	7.29e-51
chr1	77420237	77420765	3.91	9.16	-5.25	8.55e-54	7.33e-51
chr7	45121150	45121857	6.22	10.99	-4.77	1.16e-53	9.86e-51
chr12	36684250	36684954	4.67	9.86	-5.19	1.18e-53	9.97e-51
chrY	5906782	5907054	0.62	7.32	-6.7	1.19e-53	9.97e-51
chr3	78987821	78988676	4.84	10.45	-5.61	1.49e-53	1.24e-50
chrY	6712266	6712546	0.3	7.16	-6.86	1.99e-53	1.63e-50
chrY	7036680	7037105	0.63	7.52	-6.89	2.34e-53	1.91e-50
chr13	111946715	111947272	4.54	9.13	-4.59	2.46e-53	1.99e-50
chr13	111908428	111908821	2.58	8.21	-5.63	2.93e-53	2.35e-50
chr2	110311514	110311999	4.18	8.96	-4.78	3.3e-53	2.63e-50
chr10	60101615	60102675	4.75	11.17	-6.42	5.2e-53	4.11e-50
chr2	10255681	10256473	5.6	9.97	-4.36	5.36e-53	4.2e-50
chrY	6555324	6555633	0.3	7.26	-6.96	5.94e-53	4.63e-50
chrX	53391163	53391837	4.08	8.81	-4.74	7.82e-53	6.04e-50
chr10	70386839	70387497	3.91	8.67	-4.76	8.34e-53	6.4e-50
chr14	65105318	65106101	4.08	9.51	-5.43	1.11e-52	8.48e-50
chr14	101815933	101816874	6.43	10.59	-4.16	1.18e-52	8.93e-50
chr19	32281720	32282680	5.68	10.18	-4.51	1.39e-52	1.04e-49
chr1	78348676	78349770	6.47	11.14	-4.67	1.88e-52	1.39e-49
chr1	46925580	46926539	4.27	10.48	-6.22	1.89e-52	1.39e-49
chr12	94674769	94675772	4.18	9.91	-5.73	1.97e-52	1.44e-49
chr17	29985170	29985998	4.84	9.69	-4.85	4.51e-52	3.28e-49
chr4	88236870	88237454	4.1	9.2	-5.1	8.34e-52	6.03e-49
chr16	84985926	84986628	5.01	10.09	-5.08	8.79e-52	6.32e-49
chrY	10357377	10357919	1.36	7.6	-6.24	1.3e-51	9.24e-49
chrY	6824876	6825174	1.47	8.03	-6.57	1.35e-51	9.54e-49
chr10	18444263	18444942	3.83	9.18	-5.35	1.36e-51	9.59e-49
chr8	94674188	94674813	5.02	9.72	-4.69	1.79e-51	1.25e-48
chrX	17452897	17453551	2.88	8.66	-5.78	1.82e-51	1.26e-48
chr15	5980774	5981413	3.66	8.66	-5	2.06e-51	1.42e-48
chr6	29513228	29513939	6.93	10.96	-4.03	2.87e-51	1.97e-48
chrY	6746163	6746393	0.3	7	-6.7	3.23e-51	2.2e-48
chr15	61552893	61553582	5.09	10.21	-5.12	3.35e-51	2.27e-48
chr2	169288898	169289490	4.22	9.04	-4.82	3.77e-51	2.53e-48
chrY	6672019	6672476	1.76	7.97	-6.21	3.9e-51	2.6e-48
chr15	5933299	5933945	3.42	8.97	-5.55	4.48e-51	2.97e-48
chr9	32948787	32949564	3.96	9.17	-5.22	4.98e-51	3.28e-48
chr3	131676659	131677222	2.92	8.62	-5.7	5.53e-51	3.62e-48
chr15	7044130	7044905	6.12	10.31	-4.19	5.61e-51	3.65e-48
chrY	6717600	6718395	1.65	8.71	-7.06	7.34e-51	4.74e-48
chr13	30858381	30858925	4.05	9.32	-5.28	8.13e-51	5.21e-48
chr18	12834070	12834871	3.87	9.83	-5.96	8.61e-51	5.49e-48
chr2	132692351	132692859	6.31	10.14	-3.83	9.48e-51	6.01e-48
chr4	119043892	119044819	5.88	11.6	-5.71	9.66e-51	6.09e-48
chr10	96988202	96988788	2.97	8.53	-5.57	1.22e-50	7.65e-48
chr5	138526863	138527284	1.9	7.97	-6.07	1.25e-50	7.79e-48
chr1	82973773	82974820	6.23	11.13	-4.89	1.36e-50	8.42e-48
chr12	15746783	15747509	4.12	9.56	-5.44	1.5e-50	9.23e-48
chr11	22880224	22881098	4.65	9.43	-4.78	1.98e-50	1.21e-47
chr18	64790436	64790992	4.43	9.41	-4.98	2.17e-50	1.31e-47
chr6	58623083	58623805	4.97	10.11	-5.15	2.24e-50	1.35e-47
chr1	164358008	164358701	4.76	9.26	-4.5	3.36e-50	2.02e-47
chrY	6878147	6879023	1.29	7.63	-6.34	3.88e-50	2.32e-47
chr9	51078874	51079400	3.5	10.08	-6.58	4.02e-50	2.38e-47
chr1	168170507	168171266	4.11	9.1	-5	4.6e-50	2.71e-47
chr17	3249231	3250420	6.04	10.59	-4.55	4.68e-50	2.74e-47
chr16	15587498	15588207	5.28	10.34	-5.06	5.82e-50	3.39e-47
chr1	23200320	23200982	5.94	10.1	-4.16	5.87e-50	3.4e-47
chrY	6531098	6531385	1.4	7.91	-6.51	8.13e-50	4.68e-47
chrX	126042593	126043287	0.95	7.18	-6.23	8.71e-50	4.99e-47
chrX	126016285	126016690	0.78	7.12	-6.34	9.37e-50	5.34e-47
chr10	4139275	4140078	5.8	10.35	-4.55	1.13e-49	6.4e-47
chr18	62755760	62756933	8	11.8	-3.8	1.27e-49	7.16e-47
chr3	93699588	93700175	3.08	8.55	-5.47	1.51e-49	8.46e-47
chr7	58711244	58712267	6.72	11.26	-4.53	1.71e-49	9.51e-47
chr4	89513421	89514010	3.08	8.82	-5.75	1.82e-49	1.01e-46
chr1	15908588	15909221	3.82	8.98	-5.16	1.94e-49	1.07e-46
chr4	76361518	76362084	3.34	8.64	-5.31	2.15e-49	1.18e-46
chr2	135868595	135869349	5.15	9.47	-4.31	2.94e-49	1.6e-46
chr1	46921582	46922156	4.47	9.8	-5.33	3.08e-49	1.66e-46
chrY	6119309	6119669	0.2	6.86	-6.65	3.33e-49	1.79e-46
chrY	4985580	4986161	1.01	7.62	-6.6	3.95e-49	2.11e-46
chr1	150006877	150007650	5.05	10.13	-5.08	5.22e-49	2.77e-46
chrY	6988832	6989163	0.9	7.19	-6.29	5.86e-49	3.1e-46
chr6	117347160	117347850	4.72	9.34	-4.62	6.96e-49	3.66e-46
chr9	59938439	59938910	3.69	8.61	-4.92	7.55e-49	3.95e-46
chr1	136694864	136695420	5.41	9.46	-4.05	7.62e-49	3.97e-46
chr4	119045610	119046137	4.55	9.66	-5.11	8e-49	4.14e-46
chr16	43093584	43094166	3.75	8.76	-5.01	8.18e-49	4.22e-46
chr5	96253801	96254405	3.9	9.32	-5.42	8.81e-49	4.52e-46
chr3	75961837	75962198	2.51	7.76	-5.25	9.05e-49	4.62e-46
chr17	84581777	84582545	5.02	9.95	-4.93	9.67e-49	4.91e-46
chrX	130557051	130557708	3.87	8.99	-5.12	9.96e-49	5.03e-46
chr4	119039665	119040478	5.92	10.5	-4.58	1.06e-48	5.32e-46
chr6	141826028	141826608	3.66	8.98	-5.33	1.41e-48	7.06e-46
chrY	6652982	6653219	0.74	7.02	-6.28	1.63e-48	8.12e-46
chr6	147814011	147814765	4.23	9.5	-5.26	1.69e-48	8.35e-46
chr4	135291956	135293124	6.66	11.04	-4.38	1.92e-48	9.46e-46
chr1	162388496	162389258	7.01	10.64	-3.62	2.12e-48	1.04e-45
chr7	40390931	40391468	3.74	8.78	-5.04	2.17e-48	1.06e-45
chr2	85131699	85132210	4.85	9.64	-4.79	2.22e-48	1.08e-45
chr12	26446269	26447003	3.49	8.99	-5.5	2.31e-48	1.11e-45
chr14	118736932	118737814	5.77	11.17	-5.4	2.9e-48	1.4e-45
chr17	9904473	9905136	5.44	9.6	-4.16	3.31e-48	1.59e-45
chrY	6534380	6534744	1.34	7.56	-6.22	3.49e-48	1.66e-45
chr7	25530703	25531330	4.12	9.72	-5.6	3.78e-48	1.79e-45
chr6	88717005	88717856	6.08	10.65	-4.56	4.02e-48	1.9e-45
chrY	6991345	6991652	0.87	7.15	-6.29	6.54e-48	3.07e-45
chr11	111472767	111473273	2.35	8.17	-5.82	7.08e-48	3.31e-45
chr14	65098846	65099590	4.74	9.29	-4.55	7.84e-48	3.65e-45
chr16	18720253	18721519	6.52	11.15	-4.63	9.22e-48	4.28e-45
chrY	6839706	6840185	0.47	7.06	-6.58	1.06e-47	4.89e-45
chr13	26592262	26593008	3.69	9.56	-5.87	1.26e-47	5.81e-45
chrX	9256849	9257427	4.04	8.58	-4.54	1.47e-47	6.73e-45
chr12	87341307	87342134	5.56	9.94	-4.38	2.08e-47	9.47e-45
chr13	100548165	100548822	4.8	9.98	-5.18	2.17e-47	9.84e-45
chr19	57090089	57090838	5.09	10.05	-4.96	2.25e-47	1.02e-44
chrY	6773656	6774070	0.62	7.06	-6.43	2.92e-47	1.31e-44
chr3	148899342	148899874	5.94	9.93	-3.99	3.04e-47	1.36e-44
chr10	79701358	79702041	7.63	11.35	-3.72	3.79e-47	1.69e-44
chr9	116407781	116408521	3.59	9.38	-5.78	5.01e-47	2.22e-44
chr2	164866769	164867819	7.11	11.12	-4.01	5.31e-47	2.35e-44
chr4	73044302	73045122	5.3	11.2	-5.89	5.49e-47	2.41e-44
chr16	84804815	84805413	4.58	9.16	-4.57	5.83e-47	2.55e-44
chr4	48561470	48562128	3.85	8.81	-4.96	6.31e-47	2.75e-44
chr1	71681247	71681866	3.85	8.55	-4.7	6.89e-47	2.99e-44
chr5	46151716	46152299	3.47	8.75	-5.27	7.7e-47	3.33e-44
chr17	35802747	35803504	4.51	9.46	-4.95	9.43e-47	4.06e-44
chr14	70260553	70261558	5.19	9.59	-4.4	1.12e-46	4.81e-44
chrX	125996067	125996502	0.2	6.86	-6.65	1.59e-46	6.78e-44
chr13	41828310	41829665	6.88	11.18	-4.3	1.72e-46	7.31e-44
chr1	186555512	186556308	5.83	10.36	-4.53	1.8e-46	7.64e-44
chrX	107402461	107403928	7.52	11.19	-3.66	1.95e-46	8.21e-44
chr1	71936499	71937436	6.67	10.28	-3.61	2.05e-46	8.59e-44
chrY	6244853	6245315	0.77	7.02	-6.25	2.26e-46	9.45e-44
chr16	91441100	91442020	6.08	10.49	-4.41	3.09e-46	1.29e-43
chrY	6997235	6997493	1.04	7.11	-6.07	3.43e-46	1.42e-43
chrY	10355902	10356280	0.89	7.37	-6.48	4.51e-46	1.86e-43
chr10	102656721	102657267	2.28	8.71	-6.43	5.02e-46	2.07e-43
chr11	22964285	22964916	5	9.61	-4.61	5.3e-46	2.17e-43
chr4	88135775	88136830	6.48	10.17	-3.69	5.78e-46	2.36e-43
chr15	57079743	57080347	3.34	8.47	-5.13	6.27e-46	2.54e-43
chr9	32607124	32607687	4.81	9.35	-4.53	6.27e-46	2.54e-43
chr2	115599946	115600567	3.93	8.65	-4.72	6.59e-46	2.66e-43
chr14	25525612	25526316	5.72	10.27	-4.55	7e-46	2.81e-43
chr13	98071941	98072544	4.18	8.71	-4.53	7.78e-46	3.11e-43
chrY	4850077	4850474	0.2	6.68	-6.48	9.64e-46	3.84e-43
chrY	5259827	5260339	1.27	7.44	-6.17	1.06e-45	4.21e-43
chrX	101077961	101078655	3.78	9.06	-5.27	1.11e-45	4.39e-43
chrX	126077687	126078084	0.57	6.87	-6.3	1.19e-45	4.68e-43
chr7	109467777	109468764	6.5	10.91	-4.41	1.26e-45	4.96e-43
chr4	130169414	130169879	4.66	9.43	-4.77	1.37e-45	5.35e-43
chrY	10573071	10573316	0.2	6.66	-6.45	1.58e-45	6.16e-43
chr5	147640772	147641854	6.44	10.83	-4.39	1.89e-45	7.33e-43
chr10	105250858	105251709	4.07	8.97	-4.9	1.91e-45	7.38e-43
chr4	119008389	119008983	5.92	10.14	-4.21	2.08e-45	8.02e-43
chr1	40613745	40614178	3.5	8.53	-5.02	2.12e-45	8.12e-43
chr13	31369652	31370528	5.38	11.36	-5.98	2.15e-45	8.23e-43
chr2	132696654	132697585	5.48	11.16	-5.68	2.17e-45	8.28e-43
chr16	42570165	42571020	4.6	9.78	-5.18	2.35e-45	8.91e-43
chr5	17321617	17322470	3.55	9.08	-5.53	2.4e-45	9.08e-43
chrY	6122802	6123141	0.96	6.96	-6	2.52e-45	9.48e-43
chr13	26469372	26469940	3.84	9.3	-5.46	2.95e-45	1.1e-42
chr10	94572590	94573513	6.04	10.93	-4.89	2.97e-45	1.11e-42
chr7	67886992	67887875	4.31	10.67	-6.35	3.22e-45	1.2e-42
chr12	55496288	55496653	4.09	9.27	-5.18	3.28e-45	1.22e-42
chr18	39693107	39693792	4.17	8.77	-4.6	3.3e-45	1.22e-42
chr8	95143262	95144175	7.6	11.19	-3.58	3.71e-45	1.37e-42
chr3	89124057	89124738	4.27	9.43	-5.16	3.92e-45	1.44e-42
chrY	6020995	6021220	0.6	6.77	-6.17	3.96e-45	1.45e-42
chr10	104712497	104713100	2.94	8.16	-5.21	4.17e-45	1.52e-42
chr2	121574945	121575742	4.88	9.19	-4.31	4.65e-45	1.69e-42
chrY	5722134	5722992	0.3	6.67	-6.37	4.9e-45	1.77e-42
chr2	132691693	132692089	4.79	9.12	-4.34	5.15e-45	1.86e-42
chr6	114901274	114902136	6.74	10.44	-3.7	5.69e-45	2.04e-42
chr4	85915929	85916679	4.9	9.5	-4.6	6.27e-45	2.24e-42
chr10	18446447	18446905	4.43	9.03	-4.59	7.42e-45	2.65e-42
chr3	149216717	149217275	4.17	9.18	-5.01	7.56e-45	2.69e-42
chr10	105534832	105535279	3.88	8.42	-4.53	7.76e-45	2.75e-42
chrY	10362665	10363229	1.22	7.32	-6.1	8.18e-45	2.89e-42
chr4	94829788	94830861	5.92	10.26	-4.33	8.6e-45	3.02e-42
chr8	87156552	87157341	5.8	9.89	-4.09	9.27e-45	3.25e-42
chrX	58102613	58103339	3.06	7.95	-4.89	9.33e-45	3.26e-42
chr8	106054092	106054664	4.36	9.38	-5.02	1.32e-44	4.6e-42
chr13	111954227	111955013	7.18	10.88	-3.7	1.35e-44	4.67e-42
chr11	53462441	53463135	5.88	9.92	-4.04	1.53e-44	5.29e-42
chr8	68420142	68420983	4.66	10.82	-6.16	1.89e-44	6.51e-42
chr12	31621363	31622208	3.92	9.38	-5.46	1.9e-44	6.54e-42
chr7	79315996	79316833	7.2	10.95	-3.74	1.92e-44	6.56e-42
chr10	66925788	66926180	3.86	8.64	-4.78	1.99e-44	6.8e-42
chr19	23170347	23170934	4.34	9.24	-4.9	2.21e-44	7.5e-42
chrY	5879298	5879551	0.99	6.92	-5.93	2.68e-44	9.1e-42
chr11	69451792	69452780	6.91	10.49	-3.58	2.88e-44	9.74e-42
chr1	171170008	171170412	2.93	8.48	-5.55	2.9e-44	9.75e-42
chr6	147911307	147912095	4.8	9.27	-4.46	3.15e-44	1.06e-41
chrY	7043590	7044018	1.06	7.16	-6.1	3.53e-44	1.18e-41
chrY	6858487	6858964	1.35	7.28	-5.93	4.52e-44	1.51e-41
chr15	25555876	25556387	4.17	8.58	-4.42	4.94e-44	1.64e-41
chr1	131450464	131451204	4.34	9.14	-4.81	5.31e-44	1.76e-41
chr9	123850023	123850695	5.88	10.37	-4.49	5.92e-44	1.95e-41
chr5	119448475	119449778	6.34	10.57	-4.23	6.47e-44	2.13e-41
chr5	46158866	46159382	3.38	8.21	-4.83	8.17e-44	2.68e-41
chr2	127611247	127611896	4.13	9.01	-4.88	8.21e-44	2.68e-41
chr1	152461609	152462262	6.15	10.37	-4.22	8.23e-44	2.68e-41
chr11	36333900	36334689	6.88	10.62	-3.75	8.69e-44	2.82e-41
chr11	22851399	22852326	5.3	9.96	-4.66	9.88e-44	3.2e-41
chrY	6989299	6989643	1.06	7.25	-6.19	1.02e-43	3.31e-41
chr9	69226451	69226975	4.02	8.45	-4.43	1.07e-43	3.44e-41
chr5	45483584	45484202	4.63	8.97	-4.35	1.1e-43	3.52e-41
chr4	133057379	133058158	5.37	9.69	-4.31	1.13e-43	3.63e-41
chr13	37446596	37447432	6.63	10.31	-3.68	1.15e-43	3.67e-41
chr14	104499289	104499852	4.76	9.26	-4.5	1.16e-43	3.69e-41
chr7	65418490	65419390	6.5	10.98	-4.48	1.26e-43	3.98e-41
chrY	6481142	6481628	1.32	7.2	-5.87	1.35e-43	4.26e-41
chr7	66408990	66409725	5.88	9.97	-4.09	1.55e-43	4.88e-41
chrY	6502004	6502383	1.38	7.31	-5.93	1.56e-43	4.91e-41
chr13	35039717	35040164	2.74	7.79	-5.04	1.62e-43	5.08e-41
chr5	150316022	150316695	4.06	9.09	-5.04	1.67e-43	5.2e-41
chr7	58721243	58722352	4.88	9.92	-5.04	1.72e-43	5.36e-41
chr11	21174208	21174872	6.11	10.5	-4.39	2.12e-43	6.56e-41
chrY	6392767	6393030	0.88	7.12	-6.24	2.28e-43	7.02e-41
chr10	56451507	56452120	3.48	8.25	-4.77	2.28e-43	7.02e-41
chrY	89960133	89960930	1.41	7.22	-5.81	2.56e-43	7.86e-41
chrY	6095175	6095609	0.47	6.73	-6.26	2.9e-43	8.89e-41
chr1	73999451	74000735	7.49	11.35	-3.86	3.02e-43	9.24e-41
chrY	6097528	6097881	1.07	6.97	-5.9	3.08e-43	9.37e-41
chr2	37847946	37848707	5.78	10.22	-4.43	3.09e-43	9.37e-41
chr14	58607810	58608591	5.46	9.83	-4.37	3.23e-43	9.77e-41
chrY	6412256	6412522	0.54	6.82	-6.27	3.3e-43	9.96e-41
chr13	3768440	3769197	6.04	10.97	-4.92	3.81e-43	1.15e-40
chr5	122479172	122479587	3.09	8.13	-5.04	4.32e-43	1.3e-40
chr10	31416519	31417469	5.49	9.49	-4	4.59e-43	1.37e-40
chr4	54389314	54389780	3.6	8.51	-4.9	4.71e-43	1.4e-40
chrY	4845068	4845376	0.2	6.64	-6.44	4.84e-43	1.44e-40
chrY	5871029	5871289	0.95	7.12	-6.17	5.35e-43	1.59e-40
chr18	45003795	45004408	3.38	8.25	-4.87	6.01e-43	1.78e-40
chr18	62768776	62769502	4.59	9.92	-5.33	7.28e-43	2.15e-40
chrY	6546325	6546782	1.32	7.21	-5.89	7.92e-43	2.33e-40
chr18	75378553	75379099	6.3	10.06	-3.76	8.13e-43	2.38e-40
chr2	72416455	72417094	4.22	9.18	-4.95	8.32e-43	2.43e-40
chr12	34471830	34472938	6.75	10.58	-3.83	8.37e-43	2.43e-40
chr5	39437498	39438537	7.9	12.09	-4.19	8.37e-43	2.43e-40
chr12	116315237	116315991	5.28	10.21	-4.93	8.52e-43	2.47e-40
chr10	21571430	21571821	3.03	7.89	-4.86	9.8e-43	2.83e-40
chrY	6113145	6113489	0.69	6.83	-6.14	1.23e-42	3.53e-40
chr11	74107279	74107884	3.83	8.86	-5.04	1.23e-42	3.55e-40
chr18	47577391	47578334	4.64	9.64	-5.01	1.26e-42	3.6e-40
chr11	115809055	115809884	7.24	10.72	-3.48	1.28e-42	3.66e-40
chr12	86879423	86879919	4.95	8.95	-4	1.35e-42	3.85e-40
chrX	58092699	58094058	5.9	10.14	-4.25	1.39e-42	3.94e-40
chr2	19383674	19384319	3.8	8.81	-5.01	1.39e-42	3.94e-40
chr17	44228314	44228804	4.04	8.8	-4.76	1.59e-42	4.49e-40
chr11	90182380	90182817	3.76	8.19	-4.43	1.8e-42	5.08e-40
chr12	13408260	13408679	2.71	7.66	-4.95	1.81e-42	5.09e-40
chr12	86938389	86939233	4.79	9.74	-4.94	1.87e-42	5.23e-40
chr15	55413295	55414066	3.69	10.21	-6.52	1.88e-42	5.25e-40
chr3	116614278	116615300	6.2	10.87	-4.67	2.42e-42	6.74e-40
chrY	10380309	10380823	1.91	8.15	-6.24	2.44e-42	6.8e-40
chr14	60984743	60985475	5.46	9.88	-4.41	2.5e-42	6.91e-40
chr8	128373202	128373979	4.87	9.15	-4.28	2.5e-42	6.91e-40
chr18	58573706	58574361	3.73	8.95	-5.22	2.56e-42	7.05e-40
chr8	123813181	123813915	4.91	9.22	-4.31	2.57e-42	7.08e-40
chr2	155024932	155025280	3	8.39	-5.39	2.92e-42	8e-40
chr3	138715277	138716276	7.2	10.82	-3.62	2.95e-42	8.07e-40
chr18	12006531	12007135	4.58	9.77	-5.19	2.96e-42	8.07e-40
chr1	66223235	66223750	3.22	8.38	-5.17	3.11e-42	8.46e-40
chr2	33279763	33280415	4.06	8.75	-4.69	3.17e-42	8.58e-40
chr8	13986539	13987535	5.99	10.63	-4.64	3.17e-42	8.58e-40
chrY	6666621	6666858	0.74	6.72	-5.98	3.21e-42	8.67e-40
chr12	116323101	116323743	4.53	9.07	-4.55	3.31e-42	8.88e-40
chr6	43682554	43682960	2.91	7.81	-4.9	3.31e-42	8.88e-40
chr2	73366255	73366721	3.97	8.75	-4.78	3.32e-42	8.88e-40
chr13	96500013	96500363	3.49	8.22	-4.73	3.42e-42	9.14e-40
chrY	43407433	43407812	1.69	7.44	-5.75	4.5e-42	1.2e-39
chr13	31557762	31558717	8.1	11.66	-3.56	5.92e-42	1.57e-39
chr6	36793473	36794312	6.05	9.75	-3.7	5.94e-42	1.58e-39
chr13	3778348	3778850	3.55	8.25	-4.7	6.16e-42	1.63e-39
chr6	17235944	17236450	2.42	7.79	-5.37	6.33e-42	1.67e-39
chr11	5411529	5412103	4.07	8.86	-4.79	7.27e-42	1.91e-39
chr18	49643306	49644102	6.03	10.46	-4.43	7.56e-42	1.98e-39
chr13	111911743	111912489	4.29	10.2	-5.92	8.07e-42	2.11e-39
chr18	33611882	33612484	2.94	8.52	-5.58	8.26e-42	2.15e-39
chr15	25929931	25930489	4.18	8.6	-4.42	8.56e-42	2.23e-39
chr7	27330791	27331629	8.55	11.73	-3.18	9.56e-42	2.48e-39
chr15	66721976	66722757	4.79	10.58	-5.79	1.06e-41	2.75e-39
chr13	110893692	110894342	4.77	9.54	-4.76	1.12e-41	2.89e-39
chr12	69643841	69644487	3.18	8.67	-5.49	1.3e-41	3.35e-39
chr2	13767505	13768525	6.57	10.5	-3.93	1.35e-41	3.48e-39
chr13	107034647	107035090	3.35	7.94	-4.59	1.58e-41	4.05e-39
chr4	89446902	89447482	5.63	9.77	-4.14	1.95e-41	4.99e-39
chr15	59130749	59131449	3.88	8.26	-4.38	2e-41	5.1e-39
chr9	121335533	121336044	5.16	9.01	-3.85	2.24e-41	5.69e-39
chr9	120854168	120854915	5.54	10.27	-4.73	2.39e-41	6.07e-39
chr3	51360075	51360599	3.78	8.74	-4.97	2.57e-41	6.51e-39
chrY	5004573	5005135	1.84	7.35	-5.51	2.79e-41	7.05e-39
chr14	40486221	40487073	4.05	9.66	-5.61	2.99e-41	7.54e-39
chr4	86724993	86725564	4.8	9.14	-4.34	3.08e-41	7.73e-39
chr12	108698718	108699456	6.26	10.37	-4.12	3.23e-41	8.09e-39
chr10	93242103	93242666	4.5	8.47	-3.97	3.31e-41	8.28e-39
chr4	89445072	89445662	5.13	9.89	-4.76	4.57e-41	1.14e-38
chr13	31619645	31620740	7.17	10.58	-3.41	5.04e-41	1.25e-38
chr11	72466702	72467601	7.73	11.17	-3.44	5.06e-41	1.26e-38
chr4	116647147	116647498	3.32	7.91	-4.58	5.37e-41	1.33e-38
chrY	6589508	6589765	1.12	6.85	-5.73	5.71e-41	1.41e-38
chrX	107361472	107361836	1.1	6.89	-5.79	6.45e-41	1.59e-38
chr8	54405770	54406262	3.17	7.95	-4.78	6.71e-41	1.65e-38
chr10	106417087	106417791	4.41	9.68	-5.27	7.41e-41	1.82e-38
chr1	39605627	39606234	4	8.9	-4.91	8.17e-41	2e-38
chr10	79851350	79851797	4.58	9.44	-4.86	8.89e-41	2.17e-38
chrY	6827168	6827470	1.05	7.36	-6.31	1.01e-40	2.45e-38
chrY	10021034	10021601	0.63	6.7	-6.07	1.03e-40	2.51e-38
chr17	34773817	34774520	4.69	9.43	-4.74	1.14e-40	2.76e-38
chr3	7785576	7786344	4.65	8.56	-3.92	1.17e-40	2.82e-38
chr8	95380934	95381422	3.36	8.34	-4.98	1.24e-40	2.99e-38
chr7	67613884	67614539	6.06	10.37	-4.31	1.26e-40	3.02e-38
chr3	137281028	137281554	4.38	8.7	-4.32	1.27e-40	3.04e-38
chr18	58588621	58589055	2.97	7.85	-4.88	1.41e-40	3.38e-38
chr2	128272662	128273158	4.32	8.7	-4.37	1.46e-40	3.48e-38
chr7	100492742	100493536	7.31	10.52	-3.2	1.58e-40	3.78e-38
chrY	9523736	9524094	0.69	6.61	-5.92	1.74e-40	4.15e-38
chrY	5522989	5523371	1.37	6.97	-5.61	1.83e-40	4.35e-38
chr2	27096141	27097572	7.32	10.8	-3.47	2.15e-40	5.1e-38
chr11	69503795	69504373	4.74	8.84	-4.11	2.29e-40	5.41e-38
chr3	86102923	86103493	4.88	9.19	-4.31	2.34e-40	5.52e-38
chr10	79807029	79807366	3.97	8.69	-4.72	2.36e-40	5.55e-38
chr3	138788958	138789551	4.48	9	-4.52	2.37e-40	5.56e-38
chr6	17172950	17173475	3.93	9.29	-5.37	2.89e-40	6.75e-38
chr4	11609764	11610548	6.49	11.16	-4.68	2.92e-40	6.81e-38
chr9	29601873	29602516	4.38	9.51	-5.13	3.36e-40	7.82e-38
chr2	102044062	102044941	5.74	9.8	-4.06	3.39e-40	7.89e-38
chr2	65293941	65294689	4.98	10.07	-5.09	3.55e-40	8.24e-38
chr18	49607311	49607848	3.35	8.11	-4.76	3.61e-40	8.34e-38
chr1	153730452	153731177	6.01	10.73	-4.72	3.68e-40	8.5e-38
chr2	102183720	102184097	3.78	8.92	-5.14	3.77e-40	8.68e-38
chr2	150221127	150221550	2.02	7.53	-5.51	3.87e-40	8.88e-38
chr2	148345351	148345873	4.1	9.18	-5.08	3.87e-40	8.88e-38
chr14	97879455	97880195	4.26	8.88	-4.62	3.97e-40	9.07e-38
chr10	60104895	60105168	3.32	8.72	-5.4	4.11e-40	9.39e-38
chrY	6993907	6994374	1.01	6.99	-5.98	4.34e-40	9.89e-38
chr8	94706798	94707643	6.65	10.51	-3.87	4.62e-40	1.05e-37
chrX	16741485	16742310	5.16	9.37	-4.21	5.66e-40	1.28e-37
chr5	76018787	76019107	2.28	7.2	-4.92	5.91e-40	1.34e-37
chr19	8590919	8591655	5.27	9.92	-4.64	6.1e-40	1.38e-37
chrY	10320515	10320960	0.95	6.77	-5.82	6.56e-40	1.48e-37
chr10	116288045	116288668	5.56	9.87	-4.31	7.05e-40	1.58e-37
chr19	26866647	26867888	6.11	10.41	-4.3	7.43e-40	1.67e-37
chr2	60816533	60817177	3.83	9.01	-5.18	7.83e-40	1.75e-37
chr11	119958736	119959319	4.65	9.19	-4.54	8.1e-40	1.81e-37
chr2	79608450	79609105	5.11	9.35	-4.23	8.14e-40	1.81e-37
chr11	101058517	101059255	5.75	9.43	-3.68	8.71e-40	1.94e-37
chr7	89553704	89554047	2.09	7.49	-5.4	8.84e-40	1.96e-37
chr12	55376660	55377580	5.49	9.82	-4.32	9.33e-40	2.07e-37
chr10	8133240	8133904	5.17	9.37	-4.2	1.01e-39	2.23e-37
chr7	44916114	44916709	4.75	9.68	-4.92	1.14e-39	2.5e-37
chrY	6786895	6787530	2.54	8.68	-6.14	1.19e-39	2.62e-37
chr17	3641291	3641874	3.82	8.74	-4.91	1.24e-39	2.72e-37
chrY	6742144	6742670	1.55	8.09	-6.54	1.26e-39	2.75e-37
chr14	76536564	76537400	5.14	10.31	-5.17	1.26e-39	2.75e-37
chr19	46908636	46909569	5.53	9.6	-4.07	1.43e-39	3.11e-37
chr2	59838497	59839496	8	11.2	-3.2	1.43e-39	3.12e-37
chr12	51981703	51982111	3.18	7.64	-4.47	1.48e-39	3.22e-37
chrY	6439260	6439748	0.39	6.73	-6.34	1.53e-39	3.31e-37
chr16	89829891	89831075	8.42	12.03	-3.61	1.59e-39	3.43e-37
chr9	40296787	40297431	4.31	8.42	-4.11	1.61e-39	3.47e-37
chrY	10000542	10000891	0.63	6.55	-5.92	1.64e-39	3.54e-37
chrY	6013095	6013545	0.55	6.87	-6.32	1.65e-39	3.54e-37
chr4	32930988	32931502	3.66	8.81	-5.15	1.88e-39	4.04e-37
chrY	6180894	6181252	0.95	6.73	-5.79	2.04e-39	4.36e-37
chr11	60360413	60361322	5.83	10.62	-4.79	2.19e-39	4.67e-37
chr1	71672080	71672717	4.3	8.92	-4.62	2.92e-39	6.21e-37
chr9	86377007	86377780	5.42	9.17	-3.76	3.17e-39	6.73e-37
chr6	66414041	66415107	6.02	11.46	-5.45	3.53e-39	7.48e-37
chr12	73679354	73679878	5.7	9.4	-3.71	3.84e-39	8.12e-37
chr9	107651262	107652204	5.91	10.32	-4.4	3.88e-39	8.19e-37
chr18	38153353	38154073	6.38	10.06	-3.68	4.13e-39	8.7e-37
chr5	64739202	64740241	5.75	10.39	-4.64	4.24e-39	8.91e-37
chrY	6954650	6954899	0.76	6.74	-5.98	4.66e-39	9.79e-37
chr4	137801221	137801640	2.54	7.79	-5.25	4.99e-39	1.05e-36
chr5	114374156	114375029	6.67	10.16	-3.49	5.08e-39	1.06e-36
chr1	88917476	88917986	4.46	8.32	-3.86	6.59e-39	1.37e-36
chr17	89934043	89934459	2.91	7.73	-4.83	7.04e-39	1.47e-36
chr10	81408814	81409373	7.48	10.89	-3.42	1.01e-38	2.1e-36
chr13	40950674	40951198	3.83	8.58	-4.75	1.02e-38	2.12e-36
chr8	37517832	37518168	2.14	7.37	-5.23	1.07e-38	2.22e-36
chr19	57028409	57029202	6	10.8	-4.8	1.23e-38	2.53e-36
chrY	6861791	6862034	1.01	6.74	-5.73	1.37e-38	2.82e-36
chr1	162898148	162898867	5.85	9.22	-3.37	1.41e-38	2.9e-36
chr15	3232243	3232887	5.12	9.62	-4.5	1.64e-38	3.37e-36
chr11	84120937	84122022	6.18	9.76	-3.58	1.65e-38	3.37e-36
chr1	162324311	162324842	3.96	8.63	-4.67	1.73e-38	3.53e-36
chr15	12313140	12313740	4.13	9.51	-5.38	1.91e-38	3.9e-36
chr9	35235858	35236913	4.58	8.71	-4.14	1.95e-38	3.97e-36
chr6	91721115	91721933	5.52	11.71	-6.19	1.96e-38	3.99e-36
chr10	25290993	25291573	3.95	8.87	-4.92	2.03e-38	4.11e-36
chr10	69224195	69224833	5.28	9.55	-4.28	2.22e-38	4.5e-36
chr13	42562300	42562805	3.73	8.42	-4.69	2.27e-38	4.58e-36
chr11	102779898	102780771	5.54	9.97	-4.44	2.29e-38	4.62e-36
chr14	101532122	101533077	6.33	10.27	-3.94	2.37e-38	4.78e-36
chr6	37939215	37939740	3.64	8.86	-5.22	2.61e-38	5.24e-36
chr18	7610325	7611006	4.18	8.91	-4.73	2.63e-38	5.28e-36
chr11	120695143	120696150	5.35	11.08	-5.72	2.83e-38	5.65e-36
chr12	13119680	13120037	4.02	8.61	-4.59	2.85e-38	5.69e-36
chr7	6169435	6169810	3.74	8.41	-4.67	2.86e-38	5.7e-36
chr8	36644755	36645328	3.45	7.71	-4.26	2.91e-38	5.8e-36
chr1	168189817	168190182	2.54	7.75	-5.21	3.2e-38	6.35e-36
chr5	95976448	95977108	5.08	9.26	-4.18	3.21e-38	6.35e-36
chr4	24889830	24890661	5.11	9.39	-4.29	3.36e-38	6.64e-36
chr14	76670936	76671594	4.32	9.03	-4.71	3.62e-38	7.13e-36
chr3	130833002	130834014	6.24	10.02	-3.78	3.77e-38	7.42e-36
chr10	8551386	8552300	4.32	9.1	-4.78	3.83e-38	7.52e-36
chr2	77175995	77176872	7.38	11.3	-3.92	3.85e-38	7.55e-36
chr12	35283881	35284515	4.71	8.56	-3.86	3.86e-38	7.55e-36
chr17	61525580	61526102	4.11	8.95	-4.84	3.9e-38	7.62e-36
chr1	86007524	86008187	6.83	10.03	-3.2	4.27e-38	8.33e-36
chr3	15009761	15010162	2.69	7.4	-4.71	4.84e-38	9.42e-36
chr2	131500696	131501127	4.63	9.23	-4.6	4.89e-38	9.49e-36
chr18	39163450	39164065	3.89	8.28	-4.39	5.17e-38	1e-35
chrY	4534534	4534759	0.69	6.51	-5.81	5.24e-38	1.02e-35
chr6	72300775	72301376	3.38	8.05	-4.66	5.66e-38	1.09e-35
chr16	52336052	52336779	4.9	10.09	-5.19	7.01e-38	1.35e-35
chr2	85249948	85250652	5.48	10.36	-4.88	7.31e-38	1.41e-35
chr17	43827253	43827688	4.47	8.6	-4.13	7.45e-38	1.43e-35
chr2	23368233	23368925	4.84	9.27	-4.43	7.54e-38	1.45e-35
chrY	10557278	10557616	0.77	6.61	-5.84	7.87e-38	1.51e-35
chr14	70252900	70253572	5.24	9.18	-3.94	8.38e-38	1.6e-35
chr4	100291016	100291642	3.55	9.11	-5.56	9.8e-38	1.87e-35
chr10	111446409	111446768	2.87	7.32	-4.45	9.81e-38	1.87e-35
chr8	45486186	45486897	3.22	8.95	-5.73	9.83e-38	1.87e-35
chr7	140356117	140357189	4.33	9.79	-5.45	1.04e-37	1.96e-35
chrY	10418401	10418681	0.3	6.46	-6.16	1.05e-37	1.99e-35
chr11	82950890	82951648	6.07	9.51	-3.44	1.06e-37	2e-35
chr12	32713954	32714299	3.12	7.57	-4.45	1.09e-37	2.05e-35
chr11	3292813	3293416	5.66	9.23	-3.58	1.2e-37	2.25e-35
chr3	18339021	18339830	5.05	9.94	-4.9	1.27e-37	2.39e-35
chr3	115737578	115738367	5.4	9.81	-4.41	1.38e-37	2.59e-35
chr7	88296730	88297337	4.33	8.57	-4.24	1.4e-37	2.61e-35
chr4	48588620	48589038	4.84	9.28	-4.44	1.47e-37	2.75e-35
chr17	84602769	84604003	7.82	11.15	-3.33	1.49e-37	2.78e-35
chrX	14655528	14656017	3.54	7.79	-4.25	1.55e-37	2.88e-35
chr18	17680376	17681139	4.2	10.15	-5.95	1.61e-37	2.99e-35
chr5	20559214	20559842	3.94	8.8	-4.86	1.65e-37	3.07e-35
chrY	5877153	5877505	0.3	6.24	-5.94	1.78e-37	3.3e-35
chr13	111957185	111957457	3.68	8.09	-4.41	1.79e-37	3.31e-35
chrY	10017654	10017956	1.21	6.91	-5.7	1.83e-37	3.37e-35
chr13	34712747	34713305	4.71	8.75	-4.04	1.84e-37	3.4e-35
chr7	128591342	128592067	5.11	9.82	-4.71	1.87e-37	3.44e-35
chr9	98432947	98433597	5.37	9.22	-3.85	1.91e-37	3.5e-35
chr1	155488890	155489309	3.79	8.18	-4.39	1.92e-37	3.51e-35
chr5	141542842	141543556	5.45	9.46	-4.01	2.1e-37	3.84e-35
chr4	31094269	31094816	3.37	7.9	-4.53	2.23e-37	4.07e-35
chr2	139735454	139736033	3.55	7.8	-4.26	2.25e-37	4.11e-35
chr1	4470747	4471871	7.1	10.63	-3.53	2.73e-37	4.97e-35
chr14	79621188	79621850	3.72	8.1	-4.38	3e-37	5.44e-35
chrY	6048087	6048311	0.2	6.2	-6	3e-37	5.44e-35
chr13	15395225	15395696	4.48	8.54	-4.06	3e-37	5.44e-35
chr16	65543851	65544596	4.51	9.28	-4.77	3.16e-37	5.7e-35
chr6	115995989	115996648	6.7	10.4	-3.71	3.17e-37	5.71e-35
chr11	109070305	109071012	4.95	9.81	-4.86	3.2e-37	5.76e-35
chrX	126026695	126026996	2.38	7.59	-5.21	3.25e-37	5.83e-35
chr10	99676473	99677201	6.09	9.43	-3.35	3.49e-37	6.26e-35
chr16	85745778	85746694	5.5	9.72	-4.22	3.52e-37	6.29e-35
chr1	77306600	77307677	6.01	9.65	-3.63	4.18e-37	7.48e-35
chrX	9205075	9205561	3.88	8.56	-4.68	4.22e-37	7.53e-35
chrY	10366413	10366615	0.78	6.43	-5.65	4.6e-37	8.18e-35
chrY	5056597	5057062	1.12	6.77	-5.66	5.2e-37	9.24e-35
chr5	137268335	137269049	5.83	9.51	-3.68	5.72e-37	1.02e-34
chr5	76859303	76860088	5.02	10.13	-5.11	5.89e-37	1.04e-34
chr3	14891382	14891712	4.11	8.43	-4.33	6.53e-37	1.15e-34
chr8	22259908	22260797	6.69	10.37	-3.68	7.52e-37	1.33e-34
chr1	90206820	90207953	6.84	10.4	-3.56	8.51e-37	1.5e-34
chr5	123679836	123680226	4.12	7.98	-3.87	9e-37	1.58e-34
chr1	90000972	90002365	6.86	10.5	-3.64	9.02e-37	1.58e-34
chr5	150389929	150390787	6.22	9.75	-3.53	9.04e-37	1.58e-34
chr14	45503820	45504330	6.42	9.77	-3.35	9.27e-37	1.62e-34
chr3	79983800	79984394	4.03	8.38	-4.36	9.28e-37	1.62e-34
chr3	37675954	37676600	4.42	8.22	-3.79	9.41e-37	1.64e-34
chr10	14056693	14057590	7.02	11.56	-4.54	9.45e-37	1.64e-34
chr6	99011690	99012490	6.48	10.16	-3.68	9.63e-37	1.67e-34
chr4	31404675	31405304	4.55	8.94	-4.39	1.15e-36	2e-34
chr6	148390627	148391744	7.47	11.08	-3.62	1.2e-36	2.07e-34
chr18	69342652	69343207	5.22	9.12	-3.91	1.21e-36	2.09e-34
chr12	4004546	4004984	4.83	8.89	-4.05	1.25e-36	2.16e-34
chr10	78460529	78460986	4.87	9.02	-4.15	1.44e-36	2.48e-34
chr3	73848958	73849380	2.81	7.87	-5.05	1.5e-36	2.59e-34
chr6	81683022	81683570	3.64	8.13	-4.48	1.52e-36	2.6e-34
chrY	6582845	6583086	0.55	6.35	-5.81	1.52e-36	2.6e-34
chr8	119670307	119671251	7.64	10.69	-3.05	1.59e-36	2.72e-34
chr7	140510156	140510883	3.52	8.22	-4.7	1.61e-36	2.75e-34
chr12	34797247	34797974	4.78	8.96	-4.18	1.64e-36	2.79e-34
chr4	111440214	111440854	5.06	9.59	-4.53	1.66e-36	2.83e-34
chr13	102790424	102791148	4.91	9.28	-4.38	1.66e-36	2.83e-34
chr8	120473772	120474651	5.81	10.54	-4.73	1.67e-36	2.84e-34
chr2	167378937	167379651	4.19	9.09	-4.9	1.77e-36	3e-34
chr19	34673469	34674088	5.52	9	-3.48	1.8e-36	3.04e-34
chr2	173304903	173305594	5.09	9.33	-4.24	2e-36	3.39e-34
chr4	154180906	154181576	5.76	10.38	-4.62	2.06e-36	3.47e-34
chr13	32974893	32975554	5.69	9.36	-3.66	2.11e-36	3.56e-34
chr7	58684201	58684882	4.72	9.04	-4.32	2.22e-36	3.72e-34
chr1	82987829	82988942	5.91	9.39	-3.48	2.22e-36	3.72e-34
chr17	3054477	3055285	5.9	9.77	-3.87	2.27e-36	3.8e-34
chr4	89421712	89422482	5.24	9.6	-4.36	2.48e-36	4.15e-34
chr18	62762848	62763259	3.38	8.1	-4.72	2.51e-36	4.19e-34
chr5	65113177	65113824	5.2	9.38	-4.18	2.6e-36	4.33e-34
chr10	59974096	59974815	6.93	10.97	-4.04	2.75e-36	4.58e-34
chr6	117433992	117434737	5.45	10.55	-5.1	2.8e-36	4.65e-34
chr18	75566126	75566926	5.95	9.96	-4.01	2.94e-36	4.88e-34
chrY	6846280	6846645	0.38	6.27	-5.89	3.05e-36	5.06e-34
chr4	32183670	32184206	4.97	9.41	-4.44	3.18e-36	5.26e-34
chr10	77214534	77215131	5.95	9.29	-3.34	3.2e-36	5.29e-34
chrY	9174453	9174734	0.2	6.11	-5.91	3.44e-36	5.67e-34
chr11	32237714	32238812	7.1	10.3	-3.2	3.74e-36	6.16e-34
chr10	94432817	94433524	5.92	9.35	-3.43	3.78e-36	6.2e-34
chr11	108815811	108816436	3.77	8.01	-4.25	3.78e-36	6.2e-34
chr6	36797216	36797701	5.22	9.84	-4.62	3.89e-36	6.36e-34
chr9	121057245	121057883	4.86	8.63	-3.77	3.95e-36	6.45e-34
chr2	136986471	136987161	4.39	8.66	-4.26	4.29e-36	7e-34
chr18	80245221	80245788	4.44	8.44	-4	5.02e-36	8.18e-34
chr12	24633730	24634760	6.76	11.22	-4.46	5.02e-36	8.18e-34
chr5	114365021	114365737	6.29	9.66	-3.37	5.07e-36	8.24e-34
chr12	79906728	79907401	6.39	10.34	-3.95	5.21e-36	8.45e-34
chr16	85541463	85542168	5.24	9.12	-3.88	5.32e-36	8.61e-34
chr7	118821108	118821841	4.76	9.98	-5.22	5.6e-36	9.05e-34
chr14	27350977	27352124	7.69	11.18	-3.49	5.97e-36	9.64e-34
chr12	34865176	34865806	3.85	9	-5.15	6.25e-36	1.01e-33
chr9	95113227	95114116	5.42	9.79	-4.37	6.78e-36	1.09e-33
chr5	147674089	147674622	3.7	8.47	-4.76	6.8e-36	1.09e-33
chr11	19203605	19204349	4.71	9.07	-4.36	6.97e-36	1.12e-33
chr2	29295484	29296367	5.37	9.25	-3.88	6.98e-36	1.12e-33
chr7	47588557	47588918	3.33	7.61	-4.28	7.21e-36	1.15e-33
chr3	9620752	9621085	2.63	7.13	-4.49	7.27e-36	1.16e-33
chr6	85849129	85849895	5.03	10.46	-5.44	7.35e-36	1.17e-33
chrX	36228623	36229595	6.44	10.24	-3.8	7.89e-36	1.25e-33
chr10	40497049	40497577	5.15	9.15	-4	8.84e-36	1.4e-33
chr3	134368937	134369549	4.39	8.62	-4.23	8.95e-36	1.42e-33
chr9	13583931	13584448	4.37	8.27	-3.9	9.41e-36	1.49e-33
chr2	65117473	65118095	3.27	8.13	-4.86	1.02e-35	1.61e-33
chr6	84051046	84051502	4.99	9.15	-4.16	1.1e-35	1.73e-33
chr2	157382857	157383463	4.73	8.94	-4.21	1.13e-35	1.78e-33
chr2	122381157	122381909	6.44	10.21	-3.78	1.13e-35	1.78e-33
chr16	18717680	18718583	6.93	10.25	-3.33	1.18e-35	1.86e-33
chr2	32637655	32638415	6.66	10.19	-3.54	1.26e-35	1.98e-33
chr4	122983429	122984168	6.11	9.98	-3.87	1.27e-35	1.99e-33
chr13	97569882	97570638	6.15	9.79	-3.64	1.37e-35	2.14e-33
chr16	23184619	23185637	4.69	9.76	-5.07	1.45e-35	2.27e-33
chr9	60649561	60650139	5.67	9.41	-3.74	1.51e-35	2.35e-33
chr10	42454241	42454666	4.12	8.53	-4.41	1.52e-35	2.37e-33
chr9	80088178	80088697	2.84	7.81	-4.97	1.59e-35	2.47e-33
chr14	101512901	101513672	5.2	9.12	-3.92	1.6e-35	2.49e-33
chr4	89505353	89505936	4.77	8.81	-4.04	1.62e-35	2.52e-33
chr19	4507811	4508161	4.52	8.77	-4.26	1.66e-35	2.58e-33
chr8	126735438	126736961	8.91	11.86	-2.95	1.7e-35	2.63e-33
chr10	105579236	105579866	8.05	11.08	-3.03	1.81e-35	2.8e-33
chr6	117778099	117779034	7.22	10.33	-3.11	2e-35	3.08e-33
chr10	40491834	40492480	4.23	8.72	-4.49	2.25e-35	3.46e-33
chr9	32612892	32613689	5.7	10.12	-4.41	2.29e-35	3.51e-33
chr11	113008457	113009285	6.94	10.44	-3.5	2.37e-35	3.64e-33
chr19	24375731	24376366	3.94	8.34	-4.4	2.44e-35	3.74e-33
chr7	112763445	112764125	6.3	10.44	-4.14	2.81e-35	4.29e-33
chr5	81271081	81271452	3.64	8.35	-4.71	2.81e-35	4.29e-33
chr10	62664771	62665700	7.22	10.45	-3.23	2.97e-35	4.54e-33
chr14	98084840	98085385	3.05	7.53	-4.48	3.02e-35	4.6e-33
chr3	35723535	35724078	5.51	9.58	-4.08	3.25e-35	4.93e-33
chr6	51406097	51406623	3.75	7.96	-4.21	3.52e-35	5.34e-33
chrX	107414686	107415266	4.63	9.5	-4.87	3.53e-35	5.35e-33
chr2	110316073	110316680	5.3	9.4	-4.11	3.76e-35	5.69e-33
chr7	119898358	119898855	6.2	9.91	-3.7	3.85e-35	5.82e-33
chr18	6752282	6752705	3.07	7.56	-4.49	4.07e-35	6.14e-33
chr17	32340997	32341565	4.94	9.02	-4.08	4.08e-35	6.15e-33
chr5	8481017	8481706	4.5	8.9	-4.41	4.66e-35	7.01e-33
chr10	70484704	70485577	5.97	9.99	-4.02	4.7e-35	7.07e-33
chr2	59697779	59698711	6.76	9.86	-3.1	4.77e-35	7.16e-33
chr1	47260374	47260777	2.7	7.69	-4.99	4.8e-35	7.19e-33
chr9	14058353	14059762	6.79	10.91	-4.11	5.55e-35	8.31e-33
chr12	77059807	77061737	7.4	11.1	-3.7	5.65e-35	8.45e-33
chr3	131199644	131200477	5.58	8.99	-3.41	5.67e-35	8.46e-33
chr8	3225110	3226038	5.7	10.41	-4.71	5.8e-35	8.64e-33
chr6	124552728	124553387	3.87	8.17	-4.29	6.01e-35	8.94e-33
chr16	72922316	72922728	2.59	7.27	-4.68	6.13e-35	9.1e-33
chr7	127426185	127426893	6.8	10.02	-3.22	6.62e-35	9.81e-33
chr6	36808256	36808817	4.76	9.44	-4.68	6.92e-35	1.02e-32
chr5	135527606	135528494	4.86	10.17	-5.31	6.94e-35	1.03e-32
chr16	42188982	42189376	3.68	7.99	-4.31	7.48e-35	1.1e-32
chr12	85813384	85814243	7.46	11.14	-3.68	7.52e-35	1.11e-32
chr1	101756430	101756894	3.92	7.86	-3.94	7.61e-35	1.12e-32
chr2	146094069	146094467	3.27	7.75	-4.48	8.02e-35	1.18e-32
chr6	85839912	85840410	4.71	9.19	-4.48	8.93e-35	1.31e-32
chr3	133533337	133534510	6.32	10.2	-3.88	9.21e-35	1.35e-32
chr6	120647107	120647472	3.39	7.95	-4.56	9.23e-35	1.35e-32
chr4	107806094	107806728	5.15	10.65	-5.5	9.4e-35	1.37e-32
chr4	141435894	141436429	4.12	9.27	-5.15	9.43e-35	1.38e-32
chr5	143586348	143587076	5.77	9.91	-4.14	9.48e-35	1.38e-32
chr3	104227420	104227897	4.35	8.38	-4.03	9.52e-35	1.39e-32
chr6	84886509	84887189	4.5	8.31	-3.81	9.65e-35	1.4e-32
chrY	5277378	5277711	0.39	6.1	-5.71	1e-34	1.45e-32
chrY	6870371	6870582	0.2	6.09	-5.89	1e-34	1.45e-32
chr3	8988394	8989146	6.07	9.81	-3.75	1.02e-34	1.47e-32
chr16	38032700	38033339	4.98	9.94	-4.96	1.05e-34	1.52e-32
chr2	110314555	110314904	3.18	7.87	-4.69	1.06e-34	1.53e-32
chr4	94765157	94765604	3.54	8.02	-4.48	1.06e-34	1.53e-32
chr17	51128923	51129656	4.84	9.11	-4.27	1.07e-34	1.53e-32
chr2	148336326	148336693	3.66	7.99	-4.33	1.1e-34	1.58e-32
chr1	106077038	106077683	4.81	9.12	-4.31	1.26e-34	1.8e-32
chr4	118979016	118979698	4.64	8.76	-4.12	1.4e-34	2.01e-32
chr10	116211988	116212538	4.4	8.99	-4.59	1.41e-34	2.01e-32
chr13	4082629	4083468	4.16	9.77	-5.61	1.51e-34	2.16e-32
chr3	131221220	131222080	5.91	10.45	-4.54	1.54e-34	2.19e-32
chr7	65455611	65456413	5.38	9.55	-4.17	1.64e-34	2.34e-32
chr1	157408218	157408890	4.45	9.37	-4.93	1.69e-34	2.4e-32
chr3	52404421	52405197	6.78	10.4	-3.62	1.69e-34	2.4e-32
chr14	49155489	49155990	4.36	9.18	-4.82	1.72e-34	2.44e-32
chr3	58161912	58162927	8.76	11.63	-2.87	1.78e-34	2.52e-32
chr5	147751463	147752226	6.72	10.67	-3.96	1.83e-34	2.59e-32
chr4	150277432	150277825	2.7	8.09	-5.39	1.88e-34	2.66e-32
chr10	105467104	105467531	3.3	7.72	-4.42	2.16e-34	3.04e-32
chr5	36518294	36518749	4.25	8.78	-4.53	2.17e-34	3.06e-32
chr13	31664959	31665572	4.75	9.01	-4.26	2.18e-34	3.07e-32
chr2	30215334	30215920	4.33	8.47	-4.14	2.39e-34	3.35e-32
chr18	55203358	55204147	5.53	9.17	-3.64	2.4e-34	3.37e-32
chr1	36767258	36767915	5.17	8.76	-3.59	2.41e-34	3.38e-32
chr2	139753448	139754292	5.14	9.94	-4.8	2.58e-34	3.62e-32
chr11	89459145	89460324	5.9	9.72	-3.83	2.6e-34	3.64e-32
chr1	36902536	36903228	4.53	9.15	-4.62	2.68e-34	3.74e-32
chr18	75441725	75442518	7.42	10.7	-3.28	2.77e-34	3.87e-32
chr13	30891161	30891556	4.85	8.87	-4.03	3.04e-34	4.22e-32
chr5	36519607	36520324	5.53	10.74	-5.21	3.06e-34	4.25e-32
chr5	119055345	119055912	7.08	10.76	-3.68	3.16e-34	4.38e-32
chr12	86931835	86932948	6.57	10.25	-3.68	3.38e-34	4.68e-32
chr10	8933548	8933976	3.5	7.51	-4.01	3.5e-34	4.84e-32
chr8	127335212	127335887	4.41	8.66	-4.25	3.52e-34	4.86e-32
chr7	89391637	89392779	6.53	9.62	-3.1	3.63e-34	5.01e-32
chr16	89817843	89818644	7.03	10.18	-3.15	3.65e-34	5.03e-32
chr1	195083880	195084344	2.84	7.59	-4.76	3.85e-34	5.3e-32
chr15	69553394	69553994	3.57	8.6	-5.03	4.17e-34	5.73e-32
chr1	189916821	189917221	4.43	8.47	-4.04	4.64e-34	6.38e-32
chr14	122874396	122875555	7.13	10.42	-3.29	4.87e-34	6.68e-32
chr5	39587520	39588169	3.32	8.26	-4.94	5.02e-34	6.87e-32
chr15	80004357	80005469	7.76	11.23	-3.47	5.04e-34	6.89e-32
chr16	33583703	33584795	7.28	10.3	-3.02	5.15e-34	7.03e-32
chr2	85196562	85197449	4.81	8.69	-3.88	5.24e-34	7.14e-32
chr9	31320563	31321138	4.92	8.88	-3.95	5.31e-34	7.23e-32
chr8	94363094	94364113	7.45	10.63	-3.19	5.68e-34	7.73e-32
chr13	100577455	100578265	6.69	9.85	-3.16	5.93e-34	8.06e-32
chr16	95222010	95222706	5.93	10.12	-4.19	6.45e-34	8.75e-32
chr13	84611319	84611587	3.37	7.66	-4.3	6.81e-34	9.22e-32
chr16	38675742	38676338	5.07	8.8	-3.72	6.88e-34	9.31e-32
chr4	62660991	62661661	5.58	9.58	-3.99	6.97e-34	9.41e-32
chr13	5665413	5665768	2.51	7.06	-4.55	6.98e-34	9.42e-32
chr2	10159644	10160539	6.78	10.34	-3.56	7.05e-34	9.49e-32
chr14	101553028	101553699	4.49	8.75	-4.26	7.26e-34	9.77e-32
chr13	51491824	51492840	5.51	9.6	-4.09	7.29e-34	9.8e-32
chr1	180405472	180406004	6.44	9.9	-3.47	7.36e-34	9.88e-32
chr2	84011339	84011849	3.37	7.72	-4.35	7.56e-34	1.01e-31
chr5	66895251	66896416	7.36	10.39	-3.03	7.58e-34	1.01e-31
chr8	9807770	9808123	2.87	7.21	-4.34	8.65e-34	1.16e-31
chr10	95081945	95082362	2.75	7.21	-4.46	8.78e-34	1.17e-31
chr1	151045921	151046685	4.57	8.7	-4.12	8.89e-34	1.19e-31
chr5	125252187	125253159	7.3	10.98	-3.68	9.32e-34	1.24e-31
chr1	191903519	191904257	6.96	10.87	-3.91	9.81e-34	1.3e-31
chrY	5685674	5685899	0.3	6.18	-5.88	1.05e-33	1.4e-31
chr1	79918671	79919246	4.27	9.06	-4.79	1.08e-33	1.43e-31
chr19	55350531	55351319	5.99	9.45	-3.47	1.1e-33	1.45e-31
chr9	120350180	120350960	6.34	9.95	-3.61	1.1e-33	1.45e-31
chr14	32168593	32169211	4.83	9.44	-4.61	1.11e-33	1.46e-31
chr4	35115911	35116473	5.04	8.78	-3.73	1.15e-33	1.52e-31
chr3	75924496	75925108	3.06	9.03	-5.97	1.25e-33	1.64e-31
chr3	121911812	121912310	4.62	8.62	-3.99	1.38e-33	1.82e-31
chr2	114775449	114776587	5.95	9.89	-3.95	1.39e-33	1.83e-31
chr5	25526167	25526430	5.03	8.79	-3.77	1.42e-33	1.86e-31
chr8	86758962	86759577	3.95	8.48	-4.53	1.42e-33	1.87e-31
chr12	40016622	40017523	8.12	11.27	-3.16	1.44e-33	1.88e-31
chr11	89481268	89481766	3.74	7.7	-3.96	1.5e-33	1.96e-31
chrY	40929050	40929453	1.38	6.83	-5.45	1.5e-33	1.96e-31
chr14	11714256	11714910	3.96	8.1	-4.14	1.55e-33	2.02e-31
chr2	148347640	148348167	3.44	8.21	-4.77	1.63e-33	2.12e-31
chr5	111261717	111262223	5.41	9.43	-4.02	1.65e-33	2.15e-31
chr3	131803691	131804334	5.6	9.4	-3.8	1.69e-33	2.2e-31
chr9	58690813	58691487	4.07	9.19	-5.13	1.79e-33	2.32e-31
chr5	77357689	77358873	9.22	12.06	-2.83	1.86e-33	2.41e-31
chrY	4164287	4164532	1.32	6.47	-5.15	1.93e-33	2.5e-31
chr16	33696651	33697993	6.86	10.08	-3.22	2e-33	2.58e-31
chr2	53006765	53007583	6.49	9.59	-3.09	2.1e-33	2.71e-31
chr1	40651063	40651774	5.19	9.65	-4.46	2.14e-33	2.76e-31
chr2	115112636	115113127	3.35	7.83	-4.48	2.32e-33	2.99e-31
chr13	92609394	92610340	7.39	11.06	-3.67	2.32e-33	2.99e-31
chr1	89062949	89063583	6.44	10.33	-3.89	2.35e-33	3.02e-31
chr1	162421726	162422472	5.88	9.34	-3.45	2.36e-33	3.03e-31
chr10	11317931	11318663	3.42	8.09	-4.67	2.37e-33	3.04e-31
chr3	78927698	78928431	5	9.1	-4.1	2.42e-33	3.09e-31
chr14	26576418	26576668	3.03	7.53	-4.5	2.43e-33	3.11e-31
chr1	133228996	133229618	4.67	8.47	-3.8	2.49e-33	3.18e-31
chr4	53323681	53324435	4.61	9.26	-4.65	2.59e-33	3.3e-31
chrY	5704172	5704424	1.08	6.3	-5.22	2.64e-33	3.37e-31
chr7	71753777	71754168	3.33	7.41	-4.07	2.67e-33	3.4e-31
chr6	54084864	54086214	7.67	10.74	-3.07	2.7e-33	3.44e-31
chrY	5030061	5030455	1.07	6.69	-5.62	2.73e-33	3.47e-31
chr12	69367574	69368006	3.33	8.79	-5.46	2.83e-33	3.58e-31
chr15	25736423	25736982	4.79	8.67	-3.88	3.07e-33	3.88e-31
chr6	126170856	126171308	3.52	7.6	-4.09	3.15e-33	3.98e-31
chr17	79771766	79772665	4.51	9.13	-4.62	3.24e-33	4.09e-31
chr6	128133507	128134136	5.79	9.34	-3.54	3.31e-33	4.17e-31
chr16	83628630	83629021	2.85	7.4	-4.55	3.32e-33	4.19e-31
chr2	101769128	101769982	6.5	10.34	-3.84	3.64e-33	4.58e-31
chr10	66911165	66912128	7.37	10.71	-3.34	4.27e-33	5.36e-31
chr3	122474658	122475447	6.45	11.23	-4.78	4.34e-33	5.44e-31
chr1	62753027	62753623	4.93	8.55	-3.62	4.48e-33	5.61e-31
chr10	12640834	12641275	3.76	7.7	-3.94	4.48e-33	5.61e-31
chr10	21678694	21679644	8.21	11.08	-2.87	4.72e-33	5.9e-31
chr2	48776004	48776690	5.18	9.2	-4.03	5.03e-33	6.29e-31
chr5	147813818	147814377	3.62	8.08	-4.46	5.05e-33	6.3e-31
chr17	73962375	73963294	5.66	10.97	-5.31	5.13e-33	6.39e-31
chr5	65005817	65006813	5.52	9.62	-4.1	5.22e-33	6.49e-31
chr5	64364357	64365004	4.28	9.38	-5.1	5.24e-33	6.51e-31
chr11	108936127	108936848	6.03	9.29	-3.26	5.31e-33	6.59e-31
chr1	74334814	74335400	4.85	9.2	-4.35	5.43e-33	6.72e-31
chr2	69137368	69137977	4.95	9.93	-4.98	5.57e-33	6.9e-31
chr2	148592702	148593208	3.18	7.76	-4.58	5.68e-33	7.02e-31
chrY	40871558	40871789	0.47	6.04	-5.57	5.87e-33	7.25e-31
chr8	120976985	120977665	6.16	9.58	-3.43	6.13e-33	7.56e-31
chr14	76907887	76908498	4.32	9	-4.68	6.27e-33	7.72e-31
chr2	72117131	72118281	7.74	11.1	-3.36	6.44e-33	7.92e-31
chr12	51705663	51706252	5.27	8.79	-3.53	6.97e-33	8.57e-31
chr3	116374583	116374889	2.92	7.4	-4.48	7.12e-33	8.74e-31
chrX	103776130	103776930	4.62	9.18	-4.56	7.27e-33	8.92e-31
chr3	154192481	154193065	4.18	8.1	-3.92	7.39e-33	9.05e-31
chr9	57961880	57962444	5.42	9.33	-3.91	8.47e-33	1.04e-30
chrX	24008067	24008895	4.5	9.8	-5.3	8.49e-33	1.04e-30
chr18	70799037	70799841	4.99	10.44	-5.45	9.3e-33	1.13e-30
chr10	96971745	96972305	3.91	7.94	-4.03	9.59e-33	1.17e-30
chr5	64414312	64414851	3.74	8.61	-4.87	9.85e-33	1.2e-30
chr10	102712137	102712662	6.28	9.74	-3.46	9.93e-33	1.21e-30
chr4	54392053	54392434	2.82	7.18	-4.36	1.01e-32	1.22e-30
chr12	34811461	34812151	5.12	8.56	-3.44	1.02e-32	1.23e-30
chrX	75977886	75978674	4.24	8.33	-4.08	1.08e-32	1.31e-30
chr4	119009762	119010340	5.02	9.58	-4.56	1.09e-32	1.32e-30
chr16	18744609	18745180	4.38	8.71	-4.32	1.14e-32	1.38e-30
chr5	67796849	67798027	6.96	10.65	-3.69	1.16e-32	1.4e-30
chr17	8143700	8144419	6.69	10.4	-3.71	1.2e-32	1.45e-30
chr18	34743086	34743867	5.63	9.22	-3.59	1.23e-32	1.48e-30
chr8	27059403	27060371	5.69	9.75	-4.06	1.29e-32	1.55e-30
chr6	84310687	84311239	4.68	8.98	-4.3	1.3e-32	1.56e-30
chrY	5043757	5044061	0.98	6.43	-5.45	1.3e-32	1.56e-30
chr14	27684588	27685028	2.32	6.73	-4.41	1.32e-32	1.58e-30
chr3	116952102	116952862	6.4	10.11	-3.71	1.34e-32	1.6e-30
chr16	69999519	69999828	2.12	6.94	-4.82	1.35e-32	1.62e-30
chr6	92908498	92909004	3.49	7.81	-4.31	1.56e-32	1.86e-30
chr2	65330600	65331711	7.14	10.29	-3.15	1.56e-32	1.86e-30
chr3	148387249	148388074	4.7	8.95	-4.25	1.61e-32	1.92e-30
chr3	79039496	79040323	5.65	10.21	-4.56	1.61e-32	1.92e-30
chr13	109209338	109210059	6.19	9.52	-3.33	1.66e-32	1.98e-30
chr6	36845942	36846395	4.22	7.93	-3.71	1.73e-32	2.05e-30
chr15	75005093	75005498	4.12	8.14	-4.01	1.74e-32	2.07e-30
chr5	72828162	72828717	5.82	9.18	-3.36	1.76e-32	2.08e-30
chr4	87726170	87726639	3.68	7.7	-4.02	1.76e-32	2.09e-30
chr13	109266660	109267226	4.13	8.55	-4.42	1.83e-32	2.17e-30
chr3	37758050	37759263	7.5	11.02	-3.52	1.93e-32	2.28e-30
chr10	45048340	45049193	7.53	10.83	-3.3	1.95e-32	2.3e-30
chr4	95153673	95154622	6.46	10.47	-4.01	2.11e-32	2.49e-30
chr10	96751479	96752198	7.26	10.34	-3.08	2.22e-32	2.62e-30
chr16	43551542	43552039	4.98	8.73	-3.75	2.28e-32	2.68e-30
chr10	95262328	95262955	5.6	9.2	-3.6	2.32e-32	2.72e-30
chr17	43365338	43365778	5.77	9.04	-3.26	2.34e-32	2.74e-30
chr14	122870808	122871178	3.69	8.04	-4.34	2.44e-32	2.86e-30
chr6	36777837	36778358	4.41	8.35	-3.93	2.47e-32	2.89e-30
chr3	20841878	20842443	3.49	7.86	-4.37	2.57e-32	3.01e-30
chr15	50844206	50844779	4.89	8.31	-3.42	2.58e-32	3.01e-30
chr6	108668144	108668965	8.3	11.15	-2.85	2.84e-32	3.31e-30
chr8	70593823	70595012	8.21	11.38	-3.17	3.01e-32	3.5e-30
chr6	54073771	54074556	5.05	8.62	-3.57	3.07e-32	3.57e-30
chrY	5244651	5245090	1.39	6.55	-5.16	3.13e-32	3.63e-30
chr18	36421072	36421776	4.58	9.28	-4.7	3.13e-32	3.63e-30
chr12	64910962	64911603	4.23	8.42	-4.19	3.23e-32	3.74e-30
chr18	42585520	42586100	4.73	9.38	-4.65	3.39e-32	3.93e-30
chr15	73505744	73506689	6.81	10.52	-3.71	3.42e-32	3.95e-30
chr10	53438290	53438777	3.56	7.57	-4.01	3.46e-32	3.99e-30
chr4	89475794	89476243	3.6	7.68	-4.08	3.5e-32	4.04e-30
chr10	40499715	40500384	6.32	9.98	-3.67	3.5e-32	4.04e-30
chr16	59545361	59545750	3.39	7.82	-4.44	3.59e-32	4.14e-30
chr18	55548405	55549584	6.28	9.48	-3.19	3.65e-32	4.2e-30
chr8	103998244	103998779	4.06	8.37	-4.31	3.77e-32	4.33e-30
chr2	29820082	29821042	7.31	10.55	-3.23	3.88e-32	4.45e-30
chr10	111335748	111336617	5.98	9.97	-4	4.09e-32	4.69e-30
chr10	67153613	67154084	3.12	7.68	-4.56	4.17e-32	4.78e-30
chr18	31921909	31922527	5.6	9.46	-3.86	4.41e-32	5.04e-30
chr14	76685652	76686350	4.47	8.51	-4.04	4.44e-32	5.08e-30
chr5	75961859	75962638	5.62	9.28	-3.66	4.61e-32	5.25e-30
chr16	58522705	58523924	8.69	11.67	-2.98	4.61e-32	5.25e-30
chr10	79793192	79795304	8.63	11.81	-3.18	4.8e-32	5.47e-30
chr3	104568473	104568853	3.42	7.65	-4.22	4.87e-32	5.54e-30
chr17	3632309	3633021	4.76	8.69	-3.93	5.29e-32	6.01e-30
chr5	63970249	63970797	6.54	10.59	-4.05	5.3e-32	6.02e-30
chr13	93545832	93546622	5.77	9.97	-4.2	5.5e-32	6.23e-30
chr1	39237485	39238351	4.95	9.97	-5.02	5.63e-32	6.37e-30
chrY	9144389	9144667	0.47	6.02	-5.56	5.77e-32	6.53e-30
chr16	86961710	86961968	1.42	6.59	-5.17	5.85e-32	6.61e-30
chr2	103971742	103972057	4.19	8.14	-3.95	5.96e-32	6.72e-30
chr16	44357899	44358317	4.3	8.67	-4.37	6.11e-32	6.88e-30
chr5	65157459	65158445	8.23	11.16	-2.93	6.49e-32	7.31e-30
chr4	43339921	43340467	4.61	8.59	-3.98	6.81e-32	7.66e-30
chr7	19180958	19181569	6.38	9.69	-3.31	6.86e-32	7.71e-30
chr15	10715607	10715991	4.58	8.34	-3.75	8.41e-32	9.44e-30
chr8	13979849	13980624	5.7	9.14	-3.43	8.74e-32	9.8e-30
chr2	90547293	90548056	5.59	9.62	-4.03	9.14e-32	1.02e-29
chr11	32137768	32139000	7.46	11.12	-3.67	9.52e-32	1.07e-29
chr4	118500085	118500753	4.42	8.69	-4.28	9.63e-32	1.08e-29
chr6	108969543	108970305	4.58	9.05	-4.47	9.65e-32	1.08e-29
chr3	123092118	123092859	4.62	8.63	-4.02	1.03e-31	1.15e-29
chr7	130976142	130976662	4.02	9.24	-5.22	1.05e-31	1.17e-29
chr2	137136843	137137248	3.56	7.51	-3.95	1.08e-31	1.2e-29
chr8	22762308	22763172	5.07	8.85	-3.78	1.16e-31	1.29e-29
chr13	63072378	63072909	4.51	8.35	-3.84	1.17e-31	1.3e-29
chr9	105838717	105839159	4.33	8.47	-4.14	1.24e-31	1.38e-29
chr17	43035859	43036448	4.75	8.3	-3.55	1.26e-31	1.39e-29
chr1	4543797	4544579	6.81	10.78	-3.97	1.33e-31	1.47e-29
chrX	11061808	11062233	3.34	7.49	-4.15	1.39e-31	1.53e-29
chr16	6896085	6896729	5.31	9.55	-4.24	1.42e-31	1.56e-29
chr14	79140293	79141107	5.84	9.83	-3.99	1.44e-31	1.59e-29
chr6	91737835	91738635	5.22	10.68	-5.46	1.48e-31	1.63e-29
chr5	17923740	17924663	7.06	10.02	-2.96	1.53e-31	1.69e-29
chr16	11073273	11073825	4.45	8.3	-3.84	1.55e-31	1.7e-29
chr8	106839087	106839757	5.34	9.05	-3.71	1.63e-31	1.79e-29
chr9	110423510	110423921	3.79	7.65	-3.86	1.83e-31	2.01e-29
chr10	5527606	5528027	4.78	8.68	-3.9	1.91e-31	2.09e-29
chr12	85385782	85386356	4.82	8.69	-3.87	1.98e-31	2.17e-29
chr4	56961480	56962012	3.84	8.02	-4.18	2.05e-31	2.24e-29
chr7	16845082	16845933	6.96	10.26	-3.29	2.1e-31	2.29e-29
chr16	84824525	84825503	7.39	10.59	-3.2	2.13e-31	2.32e-29
chr15	51846420	51847310	5.34	9.11	-3.77	2.2e-31	2.4e-29
chr17	28217505	28218516	7.81	10.74	-2.94	2.29e-31	2.49e-29
chr2	71865904	71866664	5.51	9.96	-4.45	2.3e-31	2.5e-29
chr2	137233940	137234377	4.13	7.88	-3.75	2.35e-31	2.55e-29
chr10	93293582	93294137	5.35	9.25	-3.9	2.43e-31	2.63e-29
chr11	109097526	109098448	6.29	10.04	-3.75	2.44e-31	2.64e-29
chr13	99174744	99175727	5.82	10.39	-4.57	2.45e-31	2.65e-29
chr9	22647663	22648029	2.59	7.19	-4.6	2.49e-31	2.69e-29
chr10	110822262	110823079	4.04	9.34	-5.3	2.59e-31	2.8e-29
chr6	143315663	143316490	5.74	10.05	-4.31	2.74e-31	2.96e-29
chr9	75898984	75899514	3.18	8.13	-4.95	2.9e-31	3.12e-29
chr6	28524697	28525127	2.97	7.54	-4.56	2.92e-31	3.14e-29
chr10	3707592	3707940	3.84	7.65	-3.81	3.02e-31	3.25e-29
chr13	20383504	20384315	4.77	9.26	-4.5	3.04e-31	3.27e-29
chr18	38494485	38495297	7.2	10.63	-3.44	3.1e-31	3.33e-29
chr1	58065501	58066006	3.98	8.13	-4.15	3.15e-31	3.38e-29
chr7	18883796	18885081	7.85	11.11	-3.25	3.18e-31	3.4e-29
chr17	67440856	67441301	3.34	7.76	-4.42	3.35e-31	3.59e-29
chr18	44977253	44977693	3.09	7.82	-4.73	3.49e-31	3.73e-29
chrY	9099520	9099874	0.83	6.32	-5.49	3.54e-31	3.79e-29
chr7	89717627	89718040	3.26	7.88	-4.63	3.57e-31	3.81e-29
chr3	89314250	89315934	8.12	11.04	-2.92	3.72e-31	3.96e-29
chr8	68983461	68984139	4.46	9.25	-4.79	3.83e-31	4.08e-29
chr6	54297052	54297643	4.26	8.52	-4.26	3.85e-31	4.1e-29
chr17	86801845	86803464	8.27	11.48	-3.21	3.91e-31	4.16e-29
chr11	101801353	101801793	3.8	7.94	-4.14	4.01e-31	4.26e-29
chr2	152726292	152727348	7.2	10.56	-3.36	4.29e-31	4.55e-29
chr5	72224475	72225478	6.93	10.02	-3.08	4.36e-31	4.62e-29
chr5	121838804	121839249	6.07	9.3	-3.22	4.47e-31	4.73e-29
chr13	21293455	21293944	3.19	8.17	-4.98	4.62e-31	4.89e-29
chrY	40930713	40930925	0.97	6.07	-5.11	4.65e-31	4.91e-29
chr9	99021008	99021678	5.53	9.51	-3.98	4.71e-31	4.97e-29
chr11	37238876	37239360	4	8.32	-4.32	4.91e-31	5.17e-29
chr12	55473194	55474495	7.68	10.77	-3.08	5.08e-31	5.35e-29
chr16	87050692	87051169	3.62	7.91	-4.3	5.44e-31	5.72e-29
chr19	47460193	47460962	6.36	9.43	-3.07	5.57e-31	5.85e-29
chr11	76130722	76131619	7.2	10.06	-2.86	5.61e-31	5.89e-29
chr7	118571994	118572644	6.89	10.12	-3.23	5.75e-31	6.03e-29
chr6	147748341	147748581	2.61	7.01	-4.4	6.16e-31	6.46e-29
chr1	4571233	4572358	8.64	11.83	-3.18	6.41e-31	6.71e-29
chr6	99492634	99493363	5.75	9.32	-3.57	6.55e-31	6.85e-29
chr3	146842586	146843188	6.05	9.92	-3.87	7.02e-31	7.33e-29
chr8	124641804	124642097	2.35	6.9	-4.55	7.4e-31	7.72e-29
chr9	41326604	41327375	6.79	10.05	-3.27	7.69e-31	8.01e-29
chr8	119661010	119661588	7.11	10.25	-3.14	8.18e-31	8.51e-29
chr13	97524527	97525357	5.47	8.6	-3.13	8.21e-31	8.54e-29
chr17	86737138	86737426	4.02	7.78	-3.76	8.26e-31	8.57e-29
chr7	114198288	114198842	4.13	8.06	-3.93	8.63e-31	8.95e-29
chr11	101679679	101680346	4.61	8.53	-3.91	9.61e-31	9.96e-29
chr1	150981337	150981862	3.82	7.74	-3.92	9.69e-31	1e-28
chr1	151040811	151041557	4.96	9.42	-4.46	1.05e-30	1.08e-28
chr18	54277926	54278533	5.18	8.51	-3.33	1.06e-30	1.09e-28
chr9	107664925	107665539	5.1	9.54	-4.43	1.06e-30	1.1e-28
chr9	21455222	21455874	4.58	9.64	-5.06	1.07e-30	1.1e-28
chr10	56754286	56755202	5.51	9.61	-4.1	1.09e-30	1.12e-28
chr8	127455154	127455693	3.53	7.56	-4.03	1.1e-30	1.13e-28
chr13	43265143	43265810	5.02	8.74	-3.72	1.1e-30	1.13e-28
chr7	89720160	89720904	5.19	8.69	-3.5	1.15e-30	1.18e-28
chr9	106235924	106236676	5.95	9.9	-3.95	1.18e-30	1.21e-28
chr6	99545325	99545820	3.09	7.6	-4.5	1.2e-30	1.23e-28
chr19	32172442	32172959	5.27	8.64	-3.38	1.22e-30	1.25e-28
chr7	6258665	6259435	5.91	9.33	-3.42	1.24e-30	1.27e-28
chr9	111042277	111042715	3.56	7.6	-4.04	1.27e-30	1.29e-28
chr4	10964840	10965515	5.31	8.65	-3.34	1.29e-30	1.32e-28
chr1	172635122	172635692	6.34	10.07	-3.73	1.3e-30	1.33e-28
chr1	133492749	133493976	7.64	10.9	-3.27	1.35e-30	1.38e-28
chr11	52284021	52284669	6.19	9.75	-3.57	1.44e-30	1.46e-28
chrX	169011810	169012159	2.83	7.39	-4.57	1.45e-30	1.48e-28
chr8	36656006	36656428	3.01	7.31	-4.3	1.6e-30	1.62e-28
chr6	39445886	39446624	5.3	9.17	-3.88	1.6e-30	1.62e-28
chr3	79218297	79219498	7.33	10.5	-3.17	1.63e-30	1.65e-28
chr16	84982668	84983015	4.48	8.05	-3.57	1.66e-30	1.68e-28
chr11	104407422	104407804	2.29	7.28	-4.99	1.68e-30	1.7e-28
chr12	42181637	42182085	3.81	8.03	-4.22	1.74e-30	1.76e-28
chr2	79765033	79765432	3.45	7.27	-3.82	1.77e-30	1.79e-28
chr3	9026667	9027676	5.24	9.13	-3.89	1.85e-30	1.86e-28
chr7	79300394	79301291	7.55	10.62	-3.07	1.86e-30	1.87e-28
chrY	5073310	5073595	1.28	6.24	-4.96	1.88e-30	1.89e-28
chr16	9165863	9166464	4.81	8.9	-4.09	1.88e-30	1.89e-28
chr6	37618654	37619520	5.87	9.18	-3.31	1.89e-30	1.9e-28
chr8	84655649	84656007	4.2	8.99	-4.79	2e-30	2e-28
chr8	80895051	80896036	6.55	9.9	-3.35	2.01e-30	2.01e-28
chr9	92220041	92220662	3.27	9.23	-5.96	2.04e-30	2.04e-28
chr16	89837191	89838158	5.47	9.1	-3.63	2.05e-30	2.05e-28
chr3	8640380	8640798	4.09	8.39	-4.3	2.07e-30	2.06e-28
chr7	64050236	64050941	4.99	9.43	-4.43	2.09e-30	2.08e-28
chr8	25710492	25711024	4.78	8.57	-3.79	2.11e-30	2.11e-28
chr3	27320738	27321504	6.64	10.16	-3.52	2.27e-30	2.26e-28
chr10	75258140	75258594	4.49	8.37	-3.88	2.31e-30	2.29e-28
chr10	69908450	69908891	3.8	7.59	-3.79	2.33e-30	2.31e-28
chr15	80019511	80020208	5.23	9.44	-4.21	2.54e-30	2.52e-28
chr17	32006591	32007301	5.98	9.33	-3.35	2.57e-30	2.55e-28
chr11	11889265	11890700	6.06	10.96	-4.9	2.58e-30	2.55e-28
chr7	67910458	67911774	6.61	10.06	-3.45	2.77e-30	2.74e-28
chr1	117245960	117246562	3.79	8.1	-4.31	2.8e-30	2.77e-28
chr7	19211034	19211706	6.11	10.13	-4.02	2.83e-30	2.8e-28
chr12	80001686	80002216	4.51	8.84	-4.33	2.85e-30	2.81e-28
chr4	141439255	141439778	3.94	8.29	-4.35	2.9e-30	2.86e-28
chr15	94248393	94248755	3.67	7.53	-3.86	3.01e-30	2.96e-28
chr6	54082382	54083053	6.51	9.77	-3.25	3.44e-30	3.38e-28
chr3	39054444	39054653	2.2	6.57	-4.36	3.58e-30	3.52e-28
chr5	150378804	150379724	4.84	8.71	-3.87	3.74e-30	3.67e-28
chr2	35676275	35676603	4.77	8.48	-3.71	4.01e-30	3.93e-28
chr1	31791919	31792316	1.59	7.15	-5.56	4.06e-30	3.98e-28
chr11	75148288	75149091	5.56	10.12	-4.56	4.17e-30	4.09e-28
chr18	39119584	39120797	7.38	10.49	-3.11	4.35e-30	4.26e-28
chr18	4568430	4569118	6.34	9.59	-3.24	4.5e-30	4.4e-28
chr15	61439419	61440111	5.05	8.7	-3.65	4.51e-30	4.4e-28
chr13	99244680	99245321	5.65	9.03	-3.37	4.52e-30	4.41e-28
chr5	66458646	66459206	5.46	8.93	-3.46	4.71e-30	4.59e-28
chr10	56599629	56600398	6.45	10.66	-4.21	5.29e-30	5.15e-28
chr9	71873928	71874766	5.09	9.22	-4.13	5.61e-30	5.46e-28
chr6	54031713	54032250	3.77	7.63	-3.86	5.73e-30	5.56e-28
chr12	26457689	26458039	3.39	7.73	-4.34	6.07e-30	5.89e-28
chr12	94424257	94424940	6.71	10.56	-3.86	6.52e-30	6.32e-28
chr8	11316080	11316555	6.54	9.77	-3.24	6.9e-30	6.68e-28
chr18	69570570	69571404	6.35	10.04	-3.69	7.27e-30	7.04e-28
chr6	52485948	52487104	7.75	10.83	-3.08	7.6e-30	7.35e-28
chr11	22879694	22879996	2.95	7.06	-4.11	7.7e-30	7.44e-28
chr12	3957891	3958258	3.72	8.35	-4.63	7.84e-30	7.56e-28
chr5	35006418	35006987	4.86	8.21	-3.35	8.12e-30	7.83e-28
chr18	47441429	47442220	4.94	9.23	-4.29	8.25e-30	7.95e-28
chr10	69265311	69266055	6.14	9.57	-3.43	8.38e-30	8.07e-28
chr18	47164825	47165303	4.29	7.94	-3.65	8.49e-30	8.16e-28
chr1	126461574	126462372	6	9.48	-3.47	8.54e-30	8.2e-28
chr5	72902554	72903501	5.85	9.23	-3.38	8.64e-30	8.29e-28
chr3	123905848	123906979	7.54	11.1	-3.57	8.77e-30	8.4e-28
chr6	112855260	112855831	3.93	8.18	-4.25	8.9e-30	8.52e-28
chrY	10421227	10421778	0.38	5.79	-5.41	8.91e-30	8.53e-28
chrY	10422242	10422982	1.87	7.9	-6.03	9.05e-30	8.66e-28
chr3	22121805	22122115	3.71	7.4	-3.69	9.42e-30	9e-28
chr19	8655969	8657036	5.56	9.72	-4.15	9.57e-30	9.14e-28
chr7	128592196	128592732	5.28	9.04	-3.76	9.63e-30	9.18e-28
chr9	22640594	22641305	5.45	9.83	-4.38	9.93e-30	9.46e-28
chr18	39675500	39675929	3.65	7.44	-3.8	1.02e-29	9.67e-28
chr13	113854710	113855654	6.74	10.31	-3.56	1.07e-29	1.02e-27
chr7	25432950	25433652	5.22	9.77	-4.55	1.09e-29	1.04e-27
chr15	73504011	73504734	5.36	9.25	-3.89	1.09e-29	1.04e-27
chr17	24644739	24646326	8.7	11.62	-2.92	1.11e-29	1.05e-27
chr18	65554882	65555503	4.44	9.08	-4.63	1.12e-29	1.07e-27
chr9	116114433	116114946	5.06	8.86	-3.81	1.15e-29	1.09e-27
chr15	27801080	27801684	5.64	9.52	-3.87	1.17e-29	1.11e-27
chr11	102865036	102865788	5.96	9.71	-3.76	1.21e-29	1.14e-27
chr4	130168194	130168718	7.17	10.16	-2.99	1.24e-29	1.17e-27
chr1	183066976	183067535	4.22	9.02	-4.8	1.24e-29	1.17e-27
chr9	82864768	82865161	3.1	7.35	-4.25	1.28e-29	1.2e-27
chr2	85155257	85155772	4.38	7.96	-3.57	1.31e-29	1.24e-27
chr6	147944727	147945647	6.53	9.92	-3.39	1.32e-29	1.24e-27
chr1	135690631	135691022	4.86	8.77	-3.91	1.33e-29	1.25e-27
chr4	122955098	122956210	9.1	11.77	-2.67	1.36e-29	1.27e-27
chr2	181471098	181471681	5.38	9.49	-4.11	1.41e-29	1.32e-27
chr9	13876631	13877005	3.38	7.72	-4.34	1.44e-29	1.34e-27
chr14	102484285	102484664	3.4	7.39	-3.99	1.47e-29	1.37e-27
chr3	15242535	15242832	3.47	7.36	-3.89	1.47e-29	1.38e-27
chr1	79921875	79922169	3.26	7.57	-4.31	1.52e-29	1.42e-27
chr4	53339524	53340061	4.72	8.34	-3.61	1.55e-29	1.44e-27
chr7	101453620	101454204	6.76	10.12	-3.36	1.56e-29	1.46e-27
chr1	165610413	165611070	6.06	9.26	-3.2	1.59e-29	1.48e-27
chr6	71979837	71980805	7.91	10.81	-2.89	1.61e-29	1.5e-27
chr14	102975676	102976466	6.35	9.76	-3.41	1.68e-29	1.56e-27
chr13	3865496	3866938	7.16	10.02	-2.86	1.71e-29	1.59e-27
chr10	99902737	99903137	2.86	7.82	-4.96	1.74e-29	1.62e-27
chr8	9441324	9442092	4.5	9.67	-5.16	1.77e-29	1.64e-27
chr3	14999865	15000407	4.14	8.05	-3.91	1.78e-29	1.65e-27
chr15	75055019	75055843	4.62	9.45	-4.83	1.8e-29	1.66e-27
chr12	94488737	94489084	3.6	7.71	-4.12	1.92e-29	1.78e-27
chr7	37361662	37362515	7.77	10.75	-2.98	1.98e-29	1.83e-27
chr14	60598927	60599570	4.71	8.75	-4.03	1.98e-29	1.83e-27
chr9	90207839	90208215	3.92	8.18	-4.26	1.98e-29	1.83e-27
chr2	163696626	163697200	5.06	9.75	-4.69	1.98e-29	1.83e-27
chr8	119663385	119663957	6.2	10.01	-3.81	2e-29	1.84e-27
chr5	32412508	32413548	6.21	10.3	-4.1	2e-29	1.84e-27
chr12	45012038	45012768	5.46	8.59	-3.13	2.09e-29	1.92e-27
chr17	79935480	79936219	4.4	8.74	-4.34	2.14e-29	1.97e-27
chr3	137372689	137373511	5.98	9.58	-3.6	2.23e-29	2.05e-27
chr5	62762357	62763293	5.89	10.44	-4.55	2.28e-29	2.09e-27
chr3	52639578	52640117	4.23	8.89	-4.66	2.3e-29	2.1e-27
chr10	70438668	70438959	3.36	7.9	-4.55	2.38e-29	2.18e-27
chr5	129113356	129113755	3.04	7.26	-4.22	2.49e-29	2.28e-27
chr5	44143652	44144326	4.72	8.86	-4.15	2.65e-29	2.42e-27
chr12	108702078	108702624	6.37	10.09	-3.72	2.73e-29	2.49e-27
chr11	84968323	84969469	6.59	11.05	-4.46	2.75e-29	2.51e-27
chr7	65519823	65520570	6.25	9.16	-2.91	2.78e-29	2.53e-27
chr1	153476856	153477257	2.97	7.42	-4.45	2.78e-29	2.53e-27
chr5	138620963	138621267	4.62	8.23	-3.61	2.79e-29	2.54e-27
chr9	32637065	32637784	5.03	8.69	-3.67	2.88e-29	2.62e-27
chr19	28888325	28889003	6.36	9.98	-3.62	2.96e-29	2.68e-27
chr7	71583471	71584030	4.55	8.44	-3.89	2.96e-29	2.69e-27
chr7	133317080	133317680	6.04	9.13	-3.09	2.97e-29	2.69e-27
chr17	32024592	32025258	5.64	8.78	-3.14	3.05e-29	2.76e-27
chr18	47301967	47302345	3.58	7.53	-3.95	3.08e-29	2.78e-27
chrY	6046831	6047137	0.2	5.7	-5.5	3.27e-29	2.95e-27
chr7	38175838	38176237	4.21	8.06	-3.85	3.41e-29	3.08e-27
chr11	5317941	5318616	5.02	9.01	-3.98	3.61e-29	3.26e-27
chr16	13377971	13378764	5.47	10.01	-4.54	3.65e-29	3.29e-27
chr4	151377616	151378194	5.31	10.15	-4.84	3.65e-29	3.29e-27
chr18	88728622	88729089	3.18	7.94	-4.76	3.66e-29	3.29e-27
chr1	74434408	74435021	6.44	9.55	-3.1	3.93e-29	3.53e-27
chr5	121586484	121587317	5.97	9.82	-3.86	4.11e-29	3.69e-27
chr3	21934854	21935272	5.75	9.18	-3.44	4.42e-29	3.96e-27
chr16	91763210	91763564	3.1	7.3	-4.2	4.47e-29	4e-27
chr19	55343276	55343789	4.17	8.19	-4.02	4.48e-29	4.01e-27
chr4	103135002	103135560	3.95	8.38	-4.43	4.55e-29	4.07e-27
chr14	79277874	79278418	4.74	9.18	-4.44	4.84e-29	4.32e-27
chr3	8770328	8770688	3.39	7.35	-3.96	4.88e-29	4.35e-27
chr13	31974450	31975498	8.57	11.31	-2.73	4.99e-29	4.45e-27
chr4	88245228	88245900	4.86	8.67	-3.81	5.18e-29	4.62e-27
chr1	42487650	42488370	5.57	9.15	-3.58	5.28e-29	4.7e-27
chr3	35636480	35636912	3.29	7.48	-4.18	5.48e-29	4.88e-27
chr1	34392354	34392765	3.57	7.55	-3.99	5.94e-29	5.28e-27
chrX	57997687	57998485	4.75	8.58	-3.83	6.16e-29	5.47e-27
chr10	99894896	99895153	2.12	6.71	-4.58	6.36e-29	5.64e-27
chr5	115238778	115239140	4.93	8.55	-3.62	6.51e-29	5.77e-27
chr7	11079881	11080195	0.84	6.18	-5.34	6.69e-29	5.92e-27
chr1	135198901	135199784	5.28	9.48	-4.2	7.18e-29	6.36e-27
chr13	44210197	44210470	4.22	7.81	-3.59	7.22e-29	6.38e-27
chr11	101039813	101040395	3.69	8.4	-4.71	7.38e-29	6.52e-27
chr1	129495904	129496523	4.85	8.67	-3.83	7.39e-29	6.52e-27
chr14	78511997	78512430	2.9	7	-4.09	7.62e-29	6.72e-27
chr19	24850039	24850972	4.34	9.27	-4.93	8.1e-29	7.14e-27
chr4	122913961	122914743	5.46	8.87	-3.42	8.24e-29	7.26e-27
chr18	36507696	36508576	7.18	10.42	-3.25	8.32e-29	7.32e-27
chr3	21639579	21640028	3.77	7.75	-3.98	8.4e-29	7.38e-27
chr8	61304912	61305542	4.23	8.26	-4.03	8.57e-29	7.53e-27
chr9	48655650	48656577	5.07	8.96	-3.89	9.2e-29	8.07e-27
chr4	13727449	13727884	3.59	7.8	-4.21	9.71e-29	8.51e-27
chr19	57100948	57101522	7.25	10.17	-2.92	9.93e-29	8.7e-27
chr10	63179264	63180008	5.07	10.29	-5.22	9.98e-29	8.73e-27
chr9	22639420	22640006	4.31	8.78	-4.47	1e-28	8.77e-27
chr18	58543018	58543434	2.94	8.35	-5.41	1.03e-28	9.01e-27
chr7	38176275	38176532	3.6	7.56	-3.96	1.04e-28	9.04e-27
chr15	64416200	64416900	4.38	8.49	-4.12	1.11e-28	9.67e-27
chr14	84891870	84892454	3.82	7.61	-3.79	1.13e-28	9.83e-27
chr18	57410963	57411533	5.07	8.83	-3.76	1.14e-28	9.89e-27
chr12	85969480	85970221	5.32	9.48	-4.16	1.21e-28	1.05e-26
chr12	104845648	104846285	6.31	9.23	-2.92	1.21e-28	1.05e-26
chr10	105144280	105144840	4.37	9.92	-5.55	1.24e-28	1.07e-26
chrX	8257411	8258422	5.05	9.11	-4.06	1.24e-28	1.08e-26
chr11	112998642	112999368	6.12	9.27	-3.16	1.26e-28	1.09e-26
chr10	44607346	44608104	4.9	8.86	-3.96	1.26e-28	1.09e-26
chr15	99316920	99317853	7.28	10.21	-2.93	1.29e-28	1.12e-26
chr3	95234905	95235372	4.11	8.4	-4.3	1.31e-28	1.13e-26
chr14	6970583	6970861	2.04	6.47	-4.43	1.33e-28	1.15e-26
chr8	27166224	27167128	6.27	9.77	-3.49	1.38e-28	1.19e-26
chr12	16008883	16009647	7.66	11.02	-3.36	1.39e-28	1.2e-26
chr3	123088998	123089617	4.41	7.91	-3.51	1.4e-28	1.21e-26
chr15	39031876	39032430	4.55	8.23	-3.68	1.53e-28	1.31e-26
chr18	39252928	39253499	3.87	8.11	-4.24	1.56e-28	1.34e-26
chr2	72383289	72383721	3.89	7.99	-4.1	1.56e-28	1.34e-26
chr5	150792990	150793607	4.74	8.7	-3.96	1.84e-28	1.58e-26
chr18	74374456	74374915	4.05	8	-3.95	1.92e-28	1.64e-26
chr11	55226596	55227463	5.09	9.04	-3.94	1.93e-28	1.65e-26
chr13	91985801	91986199	3.33	7.01	-3.67	1.97e-28	1.69e-26
chr4	87002517	87003039	3.7	7.8	-4.1	1.98e-28	1.69e-26
chr9	70862779	70863839	5.91	9.74	-3.83	2e-28	1.71e-26
chr8	107116993	107117386	3.66	7.9	-4.24	2.11e-28	1.8e-26
chr19	13142768	13143090	0.89	5.92	-5.02	2.16e-28	1.84e-26
chr13	30185943	30186328	4.14	7.99	-3.85	2.18e-28	1.86e-26
chr5	105473452	105473882	3.05	7.49	-4.44	2.22e-28	1.89e-26
chr1	163485915	163486303	3.33	7.34	-4.01	2.25e-28	1.91e-26
chr4	62509891	62510513	6.31	9.97	-3.66	2.27e-28	1.93e-26
chr5	147025716	147026332	4.85	9.33	-4.49	2.31e-28	1.96e-26
chr5	125330955	125331585	5.04	9.24	-4.19	2.48e-28	2.1e-26
chr16	38744135	38744641	3.9	8.56	-4.67	2.49e-28	2.11e-26
chr11	109199601	109200268	4.75	9.16	-4.41	2.6e-28	2.2e-26
chr12	32665890	32666708	4.04	9.54	-5.51	2.71e-28	2.29e-26
chr13	39950130	39950754	4.9	8.23	-3.33	2.74e-28	2.32e-26
chr1	45826933	45827557	4.43	8.89	-4.46	2.75e-28	2.32e-26
chr2	139656879	139658087	6.06	9.59	-3.53	2.81e-28	2.37e-26
chr6	39347909	39348739	6.49	9.98	-3.49	2.82e-28	2.38e-26
chr1	119143611	119144477	5.79	9.55	-3.77	2.85e-28	2.4e-26
chr10	53100696	53101478	7.16	10.45	-3.29	2.96e-28	2.49e-26
chr2	135954785	135955472	4.13	8.16	-4.03	2.97e-28	2.5e-26
chr1	74314648	74315312	4.37	8.52	-4.15	3.01e-28	2.53e-26
chr17	67658521	67659291	4.33	8.48	-4.16	3.05e-28	2.56e-26
chr6	38144575	38145101	5.33	9.9	-4.57	3.25e-28	2.73e-26
chr1	180824567	180825168	5.21	8.36	-3.15	3.28e-28	2.75e-26
chr14	6799077	6799446	1.43	6.2	-4.77	3.33e-28	2.79e-26
chr9	57969857	57970783	7.02	10.67	-3.65	3.47e-28	2.9e-26
chr9	92603444	92604147	5.7	8.82	-3.12	3.52e-28	2.94e-26
chr17	33513114	33513507	3.39	7.53	-4.14	3.55e-28	2.96e-26
chrX	6279237	6279671	2.69	7.57	-4.87	3.65e-28	3.04e-26
chr5	151057714	151058158	4.61	8.84	-4.23	3.67e-28	3.06e-26
chr15	77922423	77923148	6.6	9.92	-3.32	3.68e-28	3.06e-26
chr6	70921079	70922196	6.55	9.35	-2.8	3.72e-28	3.09e-26
chr7	104248558	104248912	2.21	6.5	-4.29	3.76e-28	3.12e-26
chr9	57965212	57966005	6.96	9.89	-2.94	3.77e-28	3.13e-26
chr4	55066448	55066785	2.88	7.09	-4.21	3.87e-28	3.21e-26
chr19	18608910	18609555	4.64	9.13	-4.49	3.96e-28	3.29e-26
chr14	64050354	64051293	6.83	10.45	-3.62	4.02e-28	3.33e-26
chrX	126065511	126065773	0.52	5.74	-5.22	4.04e-28	3.34e-26
chr14	100162098	100162574	3.87	7.62	-3.75	4.04e-28	3.34e-26
chr16	38029455	38029857	4.46	7.96	-3.5	4.13e-28	3.42e-26
chr14	56833238	56833729	4.36	8.11	-3.76	4.2e-28	3.47e-26
chr3	115793293	115794003	7.15	9.95	-2.8	4.28e-28	3.53e-26
chr12	36224439	36225047	3.93	7.92	-3.99	4.57e-28	3.77e-26
chr1	17727094	17728055	7.9	10.75	-2.84	4.73e-28	3.89e-26
chr9	70847592	70848770	7.49	10.74	-3.25	4.73e-28	3.89e-26
chr4	126803442	126804126	5.63	8.86	-3.23	4.74e-28	3.89e-26
chr13	14590619	14591275	3.86	8.06	-4.2	4.74e-28	3.89e-26
chr15	99867530	99868055	4.96	8.22	-3.27	4.94e-28	4.05e-26
chr14	47986540	47986978	4.31	7.7	-3.4	5.08e-28	4.16e-26
chr15	92850385	92850888	3.58	7.4	-3.82	5.24e-28	4.29e-26
chr3	8510102	8510691	5.15	8.79	-3.64	5.33e-28	4.37e-26
chr10	70225720	70226258	5.05	9.05	-4	5.41e-28	4.43e-26
chr10	111853305	111853799	3.72	8.23	-4.51	6.1e-28	4.99e-26
chr7	139264354	139264809	4.44	8.14	-3.7	6.83e-28	5.58e-26
chr5	21672864	21673718	6.83	9.8	-2.97	7.27e-28	5.93e-26
chr19	4515617	4516314	5.46	9.27	-3.81	7.47e-28	6.09e-26
chr14	5052151	5052621	2.53	6.7	-4.16	7.57e-28	6.17e-26
chr4	132387019	132388188	6.42	9.64	-3.21	7.9e-28	6.43e-26
chr12	69023577	69024252	5.76	9.79	-4.03	8.27e-28	6.73e-26
chr9	29621089	29621472	2.86	7.17	-4.31	9.83e-28	7.99e-26
chr7	133204518	133204961	3.36	7.69	-4.34	9.93e-28	8.06e-26
chr3	136712573	136712871	2.05	6.73	-4.67	1.02e-27	8.25e-26
chr18	70804988	70805602	5.68	9.02	-3.34	1.03e-27	8.32e-26
chr15	97719902	97720763	6.69	10.33	-3.64	1.03e-27	8.32e-26
chr14	76819212	76820179	6.47	10.32	-3.84	1.03e-27	8.34e-26
chr12	73670581	73671934	7.39	10.69	-3.3	1.04e-27	8.43e-26
chr16	30113114	30113765	4.86	8.51	-3.66	1.08e-27	8.74e-26
chr2	158693302	158693635	3.07	7.62	-4.55	1.09e-27	8.84e-26
chr1	82806412	82806971	5	8.19	-3.2	1.1e-27	8.84e-26
chr1	133397409	133398284	8.21	10.94	-2.73	1.12e-27	9.07e-26
chr10	79805382	79806145	5.63	10.65	-5.02	1.16e-27	9.37e-26
chr15	61007314	61008173	5.97	11.28	-5.31	1.19e-27	9.55e-26
chr2	101766619	101767169	6.01	9.32	-3.32	1.21e-27	9.75e-26
chr8	91989139	91989719	5.18	9.38	-4.2	1.23e-27	9.88e-26
chr10	58673233	58674001	7.59	10.48	-2.89	1.28e-27	1.03e-25
chr8	107135932	107136608	4.37	7.84	-3.47	1.29e-27	1.03e-25
chr8	54361318	54362060	4.36	8.71	-4.35	1.31e-27	1.05e-25
chr6	146656135	146656533	3.86	7.53	-3.67	1.31e-27	1.05e-25
chr13	31830176	31830973	7.31	10.95	-3.64	1.32e-27	1.06e-25
chr1	151036420	151037047	4.67	9.09	-4.42	1.36e-27	1.09e-25
chr18	54061839	54062577	5.69	8.88	-3.19	1.4e-27	1.12e-25
chr10	78452437	78453190	6.31	10.64	-4.33	1.41e-27	1.13e-25
chr2	65108252	65108679	3.53	7.46	-3.94	1.41e-27	1.13e-25
chr13	110696429	110697226	5.85	11.25	-5.4	1.45e-27	1.16e-25
chr8	55519206	55519412	1.72	6.16	-4.44	1.45e-27	1.16e-25
chr5	24816970	24817612	4.64	8.57	-3.92	1.56e-27	1.24e-25
chr4	134734013	134735191	8.36	11.64	-3.28	1.6e-27	1.27e-25
chr2	17631575	17632341	4.55	9.06	-4.51	1.62e-27	1.29e-25
chr16	44542060	44542811	5.45	8.93	-3.47	1.63e-27	1.29e-25
chr7	18882059	18882339	4.06	8.15	-4.09	1.65e-27	1.31e-25
chr6	73072190	73072711	4.81	8.73	-3.92	1.7e-27	1.35e-25
chr18	10866082	10866982	5.3	10.33	-5.02	1.73e-27	1.37e-25
chr14	122901840	122902609	6.52	10.6	-4.07	1.73e-27	1.37e-25
chr18	77706767	77707136	3.51	7.51	-4	1.74e-27	1.38e-25
chr9	62016088	62016657	4.74	9.17	-4.42	1.77e-27	1.4e-25
chr12	23068156	23068786	2.37	6.58	-4.21	1.81e-27	1.43e-25
chr16	20016555	20016918	3.19	7.01	-3.82	1.82e-27	1.44e-25
chr7	19217937	19218518	5.63	9.61	-3.98	1.84e-27	1.45e-25
chr5	124141652	124142119	4.31	8.61	-4.3	1.85e-27	1.46e-25
chr8	35633385	35634381	7.4	10.4	-3	1.86e-27	1.47e-25
chr6	42380555	42381137	5.23	8.74	-3.52	1.9e-27	1.5e-25
chr17	27969313	27970732	7.25	10.17	-2.92	1.91e-27	1.5e-25
chr16	9362119	9363297	6.33	10.21	-3.88	1.92e-27	1.51e-25
chr1	74971550	74972165	5.1	9.26	-4.16	1.92e-27	1.51e-25
chr1	140606979	140607280	2.7	7.12	-4.41	1.94e-27	1.52e-25
chr17	88328303	88329160	5.27	8.97	-3.7	2e-27	1.57e-25
chr16	19960349	19961063	6.34	9.46	-3.11	2.06e-27	1.62e-25
chr16	57914480	57914974	3.9	8.37	-4.47	2.15e-27	1.68e-25
chr19	8149065	8149491	3.23	7.59	-4.36	2.16e-27	1.69e-25
chr11	108752121	108752825	6.14	9.24	-3.1	2.26e-27	1.77e-25
chr14	25063094	25063746	4.96	8.96	-3.99	2.33e-27	1.82e-25
chr6	125975811	125976396	4.19	7.6	-3.4	2.48e-27	1.93e-25
chr14	76622526	76623507	7.7	11.33	-3.63	2.57e-27	2e-25
chr1	192088086	192088448	4.25	8.13	-3.88	2.58e-27	2.01e-25
chr8	37019665	37019914	2.7	6.86	-4.16	2.76e-27	2.15e-25
chr8	122988296	122988622	2.84	6.85	-4.01	2.8e-27	2.17e-25
chr2	56119313	56120737	7.68	11.18	-3.51	2.81e-27	2.18e-25
chr1	151024807	151026055	7.93	10.86	-2.93	2.94e-27	2.28e-25
chr7	58746588	58747488	7.26	10.87	-3.61	2.99e-27	2.32e-25
chr17	86733643	86734068	5.39	9.36	-3.96	3.12e-27	2.41e-25
chr11	58897444	58897982	4.06	8.53	-4.47	3.16e-27	2.45e-25
chr17	47182016	47182741	5.8	9.68	-3.88	3.18e-27	2.46e-25
chr2	85129289	85130252	6.94	10.97	-4.04	3.19e-27	2.47e-25
chr5	21678879	21679325	3.32	8.3	-4.98	3.3e-27	2.55e-25
chr1	36808791	36809300	4.1	7.93	-3.84	3.36e-27	2.59e-25
chr7	135291262	135292223	5.74	9.83	-4.09	3.46e-27	2.67e-25
chr11	11844271	11845019	7.95	10.56	-2.6	3.5e-27	2.69e-25
chr8	9500470	9501279	4.91	8.83	-3.92	3.54e-27	2.72e-25
chr13	99253997	99255495	5.36	11.33	-5.97	3.55e-27	2.73e-25
chr11	76363157	76363931	4.98	8.85	-3.86	3.63e-27	2.79e-25
chr7	89555170	89555595	3.76	8.21	-4.45	3.86e-27	2.96e-25
chr1	95454156	95454800	4.34	10.53	-6.19	3.89e-27	2.98e-25
chr9	3035722	3036209	6.37	9.13	-2.76	3.99e-27	3.06e-25
chr16	58600022	58600603	4.04	8.08	-4.05	4.14e-27	3.18e-25
chr13	37510486	37510873	4.57	8.17	-3.6	4.16e-27	3.19e-25
chr5	135695202	135695729	4.44	8.11	-3.67	4.17e-27	3.19e-25
chr8	35655423	35655955	5.06	8.76	-3.7	4.17e-27	3.19e-25
chrY	10082597	10082915	0.39	5.65	-5.26	4.45e-27	3.4e-25
chr17	31920475	31921225	7.57	10.58	-3.02	4.46e-27	3.4e-25
chr2	102130231	102130679	4.23	7.82	-3.59	4.68e-27	3.57e-25
chr7	128668694	128669188	4.41	7.9	-3.49	4.76e-27	3.63e-25
chr4	100795350	100795988	4.52	8.25	-3.73	4.78e-27	3.64e-25
chr2	119327119	119327586	6.72	9.84	-3.12	4.85e-27	3.69e-25
chr12	117499196	117499765	5.08	9.47	-4.39	4.92e-27	3.75e-25
chr6	5385120	5385658	4.08	7.77	-3.69	5.06e-27	3.85e-25
chr11	101673153	101673719	5	8.42	-3.42	5.18e-27	3.94e-25
chr13	111903372	111903974	4.07	7.74	-3.67	5.31e-27	4.03e-25
chrY	10367899	10368135	0.47	5.64	-5.17	5.33e-27	4.04e-25
chr4	137800203	137800724	4.81	8.76	-3.95	5.44e-27	4.12e-25
chr2	102138156	102138778	4.84	8.49	-3.66	5.76e-27	4.36e-25
chr13	23595631	23595980	2.95	7.09	-4.14	5.77e-27	4.37e-25
chr17	80644596	80645257	5.2	8.53	-3.33	5.96e-27	4.51e-25
chr13	42399966	42400636	4.43	8.22	-3.79	5.99e-27	4.53e-25
chr3	79370395	79370877	4.07	8.08	-4	6.01e-27	4.54e-25
chr13	103748647	103749124	3.15	7.61	-4.45	6.12e-27	4.62e-25
chr8	13515843	13516534	5.45	9.63	-4.18	6.13e-27	4.62e-25
chr8	128562426	128563342	6.1	9.92	-3.82	6.24e-27	4.7e-25
chr13	115125146	115125475	3.2	7.07	-3.87	6.38e-27	4.8e-25
chr13	65351655	65352083	3.12	7.02	-3.9	6.42e-27	4.83e-25
chr12	112949922	112950970	8.72	11.34	-2.62	6.53e-27	4.91e-25
chr3	123162352	123162795	4.06	7.84	-3.78	6.66e-27	5e-25
chr13	37562140	37563027	5.94	9.53	-3.59	6.69e-27	5.02e-25
chr13	29277780	29278548	4.7	8.63	-3.94	6.83e-27	5.12e-25
chr2	49774606	49775123	3.51	7.9	-4.39	6.91e-27	5.18e-25
chrY	6725291	6725750	2.05	8.4	-6.35	7.05e-27	5.28e-25
chr11	86635368	86635677	2.91	6.9	-3.99	7.05e-27	5.28e-25
chr14	113182491	113183028	3.97	7.97	-4	7.08e-27	5.29e-25
chr11	120686501	120687318	5.11	9.68	-4.57	7.12e-27	5.32e-25
chr14	118416110	118416596	4.48	8.11	-3.63	7.16e-27	5.34e-25
chr3	130936870	130937204	3.06	7.16	-4.1	7.42e-27	5.54e-25
chr10	44482939	44483649	4.65	8.55	-3.9	7.54e-27	5.62e-25
chr6	66340627	66341147	3.98	7.88	-3.89	7.55e-27	5.62e-25
chr3	98266995	98267734	6.18	10.44	-4.26	7.76e-27	5.78e-25
chrX	133633402	133633734	2.78	6.95	-4.17	7.8e-27	5.8e-25
chr11	101048719	101049128	3.51	7.41	-3.9	7.8e-27	5.8e-25
chr18	82821423	82822276	6.64	9.57	-2.93	7.93e-27	5.89e-25
chr18	36395593	36396564	6.07	9.77	-3.7	8.39e-27	6.23e-25
chr16	20109522	20109939	3.58	7.15	-3.57	8.48e-27	6.29e-25
chr1	186224254	186224717	4.51	7.99	-3.48	8.79e-27	6.51e-25
chrX	162098397	162098821	3.47	7.4	-3.93	8.91e-27	6.6e-25
chr14	6157846	6158060	2.61	6.64	-4.03	9.25e-27	6.84e-25
chr5	81268751	81270000	6.04	9.13	-3.09	9.49e-27	7.02e-25
chr7	38189970	38190514	4.83	9.16	-4.33	9.57e-27	7.07e-25
chr1	31793195	31793441	1.86	6.45	-4.58	9.84e-27	7.26e-25
chr9	117400226	117400839	5.91	9.34	-3.43	1.01e-26	7.48e-25
chr5	76058008	76058681	4.41	8.92	-4.5	1.02e-26	7.5e-25
chr9	120734139	120734713	6.04	9.19	-3.15	1.11e-26	8.18e-25
chr2	84445229	84445867	5.09	9.16	-4.07	1.13e-26	8.28e-25
chr14	40449531	40450051	4.59	8.53	-3.94	1.14e-26	8.36e-25
chr6	88511491	88512188	6.32	9.24	-2.92	1.2e-26	8.83e-25
chr7	24455414	24456287	6.66	10.79	-4.13	1.21e-26	8.9e-25
chr12	105019422	105020263	6.26	9.24	-2.98	1.23e-26	9.05e-25
chr13	30165727	30167130	6.17	10	-3.83	1.28e-26	9.41e-25
chr9	107663296	107663858	5.54	9.16	-3.62	1.32e-26	9.66e-25
chr15	67114455	67114999	5.39	8.97	-3.58	1.33e-26	9.74e-25
chr4	109052238	109053011	5.96	9.02	-3.07	1.37e-26	1e-24
chr19	57097925	57099216	8.16	11.01	-2.85	1.38e-26	1.01e-24
chr18	44623448	44623758	3.57	7.13	-3.55	1.38e-26	1.01e-24
chrX	8260662	8261096	4.33	7.9	-3.58	1.39e-26	1.02e-24
chr14	91027330	91027814	3.23	7.53	-4.3	1.52e-26	1.11e-24
chr7	144973403	144973878	4.94	8.49	-3.55	1.56e-26	1.13e-24
chr18	5827869	5828335	3.32	7.52	-4.2	1.57e-26	1.14e-24
chr11	94070287	94070897	3.8	8.14	-4.33	1.58e-26	1.15e-24
chr4	128980151	128980849	4.08	8.18	-4.1	1.68e-26	1.22e-24
chr11	60345074	60345452	3.17	7.39	-4.22	1.72e-26	1.25e-24
chr1	172357174	172357897	6.01	8.98	-2.96	1.74e-26	1.26e-24
chr12	51505590	51506043	4.09	7.96	-3.86	1.76e-26	1.28e-24
chr18	3665887	3666960	5.48	9.47	-4	1.77e-26	1.28e-24
chr11	118234424	118235263	6.06	9.77	-3.71	1.79e-26	1.29e-24
chr3	95292278	95292883	4.21	8.93	-4.72	1.79e-26	1.3e-24
chr7	34312620	34313897	9.58	12.19	-2.61	1.84e-26	1.33e-24
chr10	126971424	126972392	6.46	9.33	-2.87	1.88e-26	1.36e-24
chr10	102636529	102636887	2.63	7.32	-4.7	2.06e-26	1.49e-24
chr13	30986713	30987417	6.77	10.06	-3.28	2.08e-26	1.5e-24
chr3	121914418	121915599	7.14	10.38	-3.24	2.12e-26	1.53e-24
chr6	13830657	13831279	3.88	9.03	-5.15	2.13e-26	1.53e-24
chr3	145798641	145799287	7.64	10.33	-2.68	2.14e-26	1.54e-24
chr7	89773298	89774387	8.18	11.58	-3.41	2.17e-26	1.56e-24
chr16	17927647	17929292	9.14	11.68	-2.54	2.18e-26	1.57e-24
chr1	157443142	157444466	7.1	10.03	-2.93	2.19e-26	1.58e-24
chr1	83020083	83021237	7.82	10.52	-2.7	2.23e-26	1.6e-24
chr5	44055845	44056388	4.15	8.12	-3.97	2.33e-26	1.67e-24
chr11	5255481	5255837	3.5	7.94	-4.44	2.42e-26	1.74e-24
chr18	11392449	11393516	6.42	9.58	-3.16	2.45e-26	1.76e-24
chr9	41937713	41938674	5.57	9.9	-4.32	2.45e-26	1.76e-24
chr2	32654633	32655274	6.51	9.99	-3.48	2.47e-26	1.77e-24
chr10	19619707	19620101	3.68	7.73	-4.05	2.52e-26	1.8e-24
chr3	122473468	122474507	8.08	10.92	-2.83	2.53e-26	1.81e-24
chr10	105514196	105514586	4.27	7.76	-3.49	2.58e-26	1.84e-24
chr5	17919040	17919292	2.88	6.84	-3.95	2.67e-26	1.91e-24
chr9	63108958	63109897	7.46	10.22	-2.76	2.79e-26	1.99e-24
chr7	135302656	135303455	4.32	8.96	-4.64	2.79e-26	1.99e-24
chr2	148505557	148506302	5.54	9.48	-3.95	2.81e-26	2e-24
chr8	77316917	77317672	5.56	8.52	-2.96	2.87e-26	2.05e-24
chr1	123827478	123827695	2.38	6.51	-4.13	2.95e-26	2.1e-24
chr8	35654353	35655213	6.06	9.64	-3.58	2.96e-26	2.1e-24
chr14	121362726	121363239	4.87	8.61	-3.74	2.98e-26	2.12e-24
chr7	120739005	120740152	6.88	10.67	-3.8	3e-26	2.13e-24
chr5	131750363	131750760	3.84	7.54	-3.7	3.14e-26	2.23e-24
chr1	78409444	78409912	4.13	8.44	-4.31	3.16e-26	2.24e-24
chr11	108933800	108934265	5.13	8.73	-3.6	3.25e-26	2.3e-24
chr11	60976736	60977564	5.24	9.15	-3.91	3.29e-26	2.33e-24
chr11	78924054	78924783	5.43	8.88	-3.45	3.34e-26	2.36e-24
chr7	112170162	112170735	4.46	8.1	-3.64	3.4e-26	2.4e-24
chr11	30275308	30275990	5.52	9.7	-4.18	3.51e-26	2.48e-24
chr19	6339935	6341619	8.97	11.69	-2.72	3.72e-26	2.63e-24
chr8	9434956	9435873	5.87	9.21	-3.34	3.74e-26	2.63e-24
chr3	88622576	88623076	6.16	9.29	-3.13	3.77e-26	2.66e-24
chr6	88204461	88204927	5.35	8.96	-3.61	3.81e-26	2.68e-24
chr1	71723436	71724373	6.84	9.85	-3.01	4.01e-26	2.82e-24
chr2	131499245	131499816	4.7	8.96	-4.26	4.39e-26	3.08e-24
chr18	39047592	39048156	4.67	8.33	-3.67	4.41e-26	3.1e-24
chr2	165982494	165983412	6.46	9.66	-3.21	4.44e-26	3.12e-24
chr18	13347594	13348483	5.27	9.48	-4.21	4.53e-26	3.18e-24
chrY	5696411	5696691	0.95	5.92	-4.97	4.56e-26	3.2e-24
chr11	28422813	28423321	3.82	8.07	-4.25	4.61e-26	3.23e-24
chr2	152177078	152177673	6.89	10.33	-3.44	4.66e-26	3.26e-24
chr12	73341966	73342720	6.21	9.46	-3.25	4.67e-26	3.26e-24
chrY	6050912	6051161	0.7	5.91	-5.21	4.78e-26	3.34e-24
chr7	27334399	27334955	6.21	11.07	-4.87	4.87e-26	3.4e-24
chr17	27953909	27954396	4.78	8.09	-3.3	4.96e-26	3.46e-24
chr10	63060332	63060944	5.21	8.83	-3.61	5.33e-26	3.71e-24
chr2	169728628	169729227	4.37	8.05	-3.68	5.34e-26	3.72e-24
chr4	138496740	138497449	5.13	9.4	-4.27	5.37e-26	3.74e-24
chr2	112396572	112397026	4.37	7.91	-3.54	5.39e-26	3.75e-24
chr5	111465823	111466920	7.29	10.02	-2.72	5.56e-26	3.86e-24
chr17	27571221	27571684	4.16	7.81	-3.65	5.58e-26	3.87e-24
chr15	39018555	39019312	6.34	9.88	-3.54	5.61e-26	3.9e-24
chr12	85784843	85785540	7.08	9.97	-2.89	5.63e-26	3.91e-24
chr15	15135396	15135969	4.08	7.57	-3.49	5.68e-26	3.94e-24
chr10	88252347	88252842	3.56	7.79	-4.23	5.77e-26	4e-24
chr6	51393215	51393935	4.82	9.07	-4.25	5.9e-26	4.08e-24
chr9	110439882	110440577	6.14	9.5	-3.36	6.07e-26	4.2e-24
chr3	75909340	75909745	3.87	7.38	-3.51	6.08e-26	4.2e-24
chr13	102698652	102699483	7.56	10.3	-2.74	6.17e-26	4.26e-24
chr6	29193866	29194667	7.3	10.34	-3.04	6.24e-26	4.3e-24
chr12	39958152	39958859	4.46	9.08	-4.63	6.51e-26	4.49e-24
chr8	115448231	115448976	5.64	10.19	-4.55	6.72e-26	4.63e-24
chr18	66448892	66449475	4.67	8.08	-3.41	6.73e-26	4.63e-24
chr10	86331425	86332519	6.76	10.56	-3.79	6.76e-26	4.66e-24
chr9	120360341	120361212	7	10.81	-3.8	7.13e-26	4.9e-24
chr9	32544677	32545069	5.53	8.45	-2.91	7.19e-26	4.94e-24
chr5	124210695	124211144	6.44	9.24	-2.8	7.35e-26	5.04e-24
chr17	54760785	54761369	3.68	7.69	-4.01	7.42e-26	5.09e-24
chr17	80643129	80643544	4	8.04	-4.04	7.43e-26	5.1e-24
chr19	53311769	53312172	5.8	8.96	-3.16	7.6e-26	5.21e-24
chr5	15006395	15007298	5.03	8.19	-3.17	7.65e-26	5.24e-24
chr2	57116324	57117211	8.91	11.36	-2.44	7.78e-26	5.33e-24
chr2	79429562	79430003	4.78	7.96	-3.18	7.8e-26	5.33e-24
chr10	84665683	84666180	4.49	8.12	-3.63	7.86e-26	5.37e-24
chr9	32555163	32555850	4.59	9.35	-4.77	7.87e-26	5.37e-24
chr11	7838203	7839136	5.54	9.66	-4.12	7.95e-26	5.43e-24
chr18	75377101	75377930	7.65	10.49	-2.84	8.05e-26	5.49e-24
chr1	90497547	90497985	4.17	7.63	-3.47	8.22e-26	5.6e-24
chr18	7117566	7118344	5.28	9.05	-3.77	8.22e-26	5.6e-24
chr10	128746306	128746624	3.25	7.92	-4.67	8.26e-26	5.62e-24
chr8	9432515	9433247	5.28	8.4	-3.12	8.3e-26	5.65e-24
chr18	20852637	20852926	2.57	7.06	-4.48	8.47e-26	5.76e-24
chr16	32538041	32538754	4.49	10.38	-5.89	8.49e-26	5.77e-24
chr15	43275380	43275712	3.37	7.07	-3.71	9.01e-26	6.12e-24
chr6	88227543	88228033	4.7	8.87	-4.17	9.34e-26	6.34e-24
chr3	130883836	130884861	5.01	9.43	-4.41	9.41e-26	6.38e-24
chr4	107733498	107734449	5.77	10.21	-4.44	9.55e-26	6.47e-24
chr4	55650935	55651872	10.04	12.42	-2.38	9.58e-26	6.49e-24
chr13	12597080	12597516	3.91	7.39	-3.48	9.64e-26	6.52e-24
chrY	10469554	10469839	0.62	5.7	-5.08	9.64e-26	6.52e-24
chrJH584304.1	111616	111976	5.04	8.95	-3.92	1e-25	6.76e-24
chr14	12107400	12107857	6.64	9.6	-2.96	1.02e-25	6.89e-24
chr6	91714932	91715469	6.72	9.68	-2.96	1.04e-25	7.04e-24
chr14	61012326	61013031	7.55	10.2	-2.65	1.05e-25	7.06e-24
chr6	136330488	136330796	3.85	7.46	-3.6	1.08e-25	7.28e-24
chr13	112196630	112197263	6.02	8.84	-2.82	1.1e-25	7.42e-24
chr14	62118473	62119007	4.52	8.14	-3.62	1.12e-25	7.53e-24
chr16	91427407	91427930	3.77	8.16	-4.39	1.13e-25	7.57e-24
chrX	57693989	57694438	3.19	7.9	-4.71	1.14e-25	7.66e-24
chr16	34493737	34494379	5.47	9.69	-4.21	1.16e-25	7.79e-24
chr4	11609366	11609591	4.98	8.01	-3.03	1.25e-25	8.38e-24
chr10	79697913	79698379	5.39	10.21	-4.82	1.31e-25	8.79e-24
chr1	189115844	189116473	4.76	9.42	-4.66	1.36e-25	9.14e-24
chr12	41219079	41219402	2.97	6.83	-3.86	1.4e-25	9.38e-24
chr8	3270332	3270826	4.46	7.67	-3.21	1.42e-25	9.53e-24
chr6	48546851	48547285	3.98	7.56	-3.57	1.45e-25	9.7e-24
chr13	102658165	102658775	5.35	8.51	-3.16	1.56e-25	1.04e-23
chr14	51069016	51069423	4.19	8.51	-4.32	1.58e-25	1.06e-23
chr1	165737368	165737801	3.88	7.38	-3.5	1.62e-25	1.08e-23
chr19	57009053	57009569	4.37	8.62	-4.25	1.64e-25	1.1e-23
chr4	61571441	61572029	4.46	8.03	-3.57	1.66e-25	1.1e-23
chr1	186386400	186387043	5.29	8.74	-3.45	1.66e-25	1.11e-23
chr4	55604670	55605577	7.52	11.47	-3.95	1.7e-25	1.13e-23
chr5	102969732	102970037	2.77	7.08	-4.31	1.7e-25	1.13e-23
chr13	31917494	31917962	4.38	7.86	-3.48	1.71e-25	1.14e-23
chr18	6471221	6471638	4.67	7.88	-3.22	1.76e-25	1.17e-23
chr13	112084514	112085017	4.15	7.53	-3.37	1.76e-25	1.17e-23
chr5	150180128	150180854	6.11	9.21	-3.1	1.77e-25	1.17e-23
chr13	93977681	93978078	4.13	8.27	-4.14	1.77e-25	1.17e-23
chr7	65516603	65517744	7.49	10.65	-3.16	1.91e-25	1.26e-23
chr7	128593006	128593484	4.27	8.24	-3.98	2e-25	1.33e-23
chr9	21846553	21847410	7.82	10.61	-2.79	2.02e-25	1.34e-23
chr10	117106109	117106868	5.18	8.73	-3.55	2.06e-25	1.36e-23
chr7	38179980	38180359	4.2	8.76	-4.56	2.06e-25	1.36e-23
chrX	123227631	123228153	2.2	6.51	-4.31	2.08e-25	1.37e-23
chr1	120357287	120358002	6.16	9.62	-3.46	2.08e-25	1.38e-23
chr12	36041534	36042869	8.9	11.8	-2.91	2.16e-25	1.42e-23
chr15	32307609	32308199	3.79	7.76	-3.97	2.21e-25	1.46e-23
chr10	122711481	122712141	5.03	8.72	-3.69	2.3e-25	1.51e-23
chr5	5944799	5945285	1.03	6.83	-5.8	2.38e-25	1.57e-23
chr12	99564588	99564987	4.3	7.91	-3.6	2.46e-25	1.62e-23
chr17	32121804	32122951	6.97	10.1	-3.13	2.46e-25	1.62e-23
chr1	36761432	36762138	5.62	9.09	-3.48	2.46e-25	1.62e-23
chr12	35021860	35022339	4.91	8.71	-3.8	2.46e-25	1.62e-23
chr1	153274682	153275019	2.83	7.1	-4.27	2.52e-25	1.66e-23
chr3	121900272	121901024	6.19	9.19	-3	2.53e-25	1.66e-23
chr1	194927698	194928415	6.98	10.93	-3.95	2.61e-25	1.71e-23
chr15	101233338	101234205	6.44	10.54	-4.1	2.63e-25	1.72e-23
chr2	49297118	49297402	2.68	6.7	-4.02	2.75e-25	1.8e-23
chr7	81273724	81274407	5.62	9.36	-3.74	2.83e-25	1.85e-23
chr3	8642891	8643736	4.95	9.73	-4.77	2.89e-25	1.89e-23
chr9	53794447	53795654	7.13	10.16	-3.03	2.94e-25	1.92e-23
chr1	54702875	54703299	4.28	7.81	-3.53	2.98e-25	1.94e-23
chr1	4739201	4739946	4.47	9.67	-5.2	3.07e-25	2e-23
chr5	150514057	150514896	5.26	9.07	-3.81	3.12e-25	2.04e-23
chr18	17639962	17640603	5.27	8.27	-2.99	3.16e-25	2.06e-23
chr5	105145757	105147083	7.94	11.11	-3.17	3.17e-25	2.07e-23
chr10	121429894	121430458	6.17	9.19	-3.02	3.35e-25	2.18e-23
chr18	17624581	17625046	4.21	7.63	-3.43	3.38e-25	2.2e-23
chr7	25463098	25463555	2.84	6.66	-3.82	3.45e-25	2.24e-23
chr7	19753580	19753971	6.67	9.56	-2.88	3.49e-25	2.27e-23
chr2	25048536	25049315	5.95	9.12	-3.17	3.52e-25	2.29e-23
chr19	20601694	20602211	4.71	8.06	-3.35	3.57e-25	2.32e-23
chr3	30457801	30458585	6.61	9.59	-2.98	3.59e-25	2.33e-23
chr5	148388266	148388617	5.32	8.52	-3.21	3.73e-25	2.42e-23
chr9	71648223	71648986	5.58	8.58	-3.01	3.76e-25	2.44e-23
chr17	25163922	25164655	5.14	9.42	-4.28	3.78e-25	2.45e-23
chr9	22708773	22709325	6.3	9.36	-3.06	3.81e-25	2.46e-23
chr5	147037137	147037797	5.04	9.5	-4.47	3.82e-25	2.47e-23
chr15	38378084	38378560	6.19	9.7	-3.51	3.83e-25	2.47e-23
chr5	31451318	31451847	5.87	8.85	-2.98	3.91e-25	2.52e-23
chr18	46772873	46773513	5.3	8.46	-3.17	3.92e-25	2.53e-23
chr12	35846813	35847533	4.36	8.24	-3.88	3.98e-25	2.57e-23
chr8	120276039	120277394	8.85	11.39	-2.53	4.01e-25	2.58e-23
chr5	118675635	118676100	4.83	7.87	-3.04	4.01e-25	2.59e-23
chr7	67847476	67848139	4.59	9.04	-4.45	4.06e-25	2.61e-23
chr18	84274693	84275307	6.93	9.98	-3.06	4.08e-25	2.63e-23
chr13	4035125	4035743	4.39	8.82	-4.43	4.18e-25	2.69e-23
chr15	38987150	38987628	3.96	7.7	-3.75	4.22e-25	2.71e-23
chr2	79624463	79624837	3.25	7.31	-4.05	4.27e-25	2.74e-23
chr11	4217800	4218761	8.79	11.3	-2.51	4.44e-25	2.85e-23
chr2	119398681	119399261	4.27	7.7	-3.42	4.46e-25	2.86e-23
chr3	52708109	52708649	4.23	7.79	-3.57	4.58e-25	2.94e-23
chr19	53051979	53052859	6.47	9.88	-3.4	4.66e-25	2.98e-23
chr10	12791746	12792452	7.32	9.97	-2.64	4.68e-25	2.99e-23
chr2	80300525	80301295	6.77	9.44	-2.67	4.69e-25	3e-23
chr10	38980803	38981556	8.61	11.11	-2.49	4.72e-25	3.02e-23
chr17	84045570	84046299	4.86	9.19	-4.33	4.74e-25	3.03e-23
chr4	57841950	57842337	5.29	8.71	-3.43	4.74e-25	3.03e-23
chr19	3668558	3669668	7.12	10.37	-3.25	4.77e-25	3.04e-23
chr4	122587963	122588353	3.39	7.15	-3.76	4.77e-25	3.04e-23
chr13	52222151	52223364	6.31	10.02	-3.7	4.85e-25	3.09e-23
chr9	78121211	78121940	6.59	9.37	-2.77	4.87e-25	3.1e-23
chr6	92014861	92015579	6.8	10.02	-3.22	5.02e-25	3.19e-23
chr11	94183476	94184135	5.84	8.97	-3.14	5.1e-25	3.24e-23
chr14	100260341	100261261	7.14	9.8	-2.66	5.23e-25	3.33e-23
chr3	65799636	65800163	4.46	8.15	-3.69	5.29e-25	3.36e-23
chr12	13122170	13122727	4.7	9.65	-4.95	5.42e-25	3.44e-23
chr9	30464493	30465339	6.25	10.24	-3.99	5.49e-25	3.48e-23
chr10	56823679	56824457	4.83	8.38	-3.55	5.6e-25	3.55e-23
chr7	140756188	140756897	4.87	9.19	-4.32	5.8e-25	3.67e-23
chr13	40948772	40949035	3.17	6.93	-3.76	6.05e-25	3.83e-23
chr11	12335934	12336641	7.55	10.8	-3.25	6.22e-25	3.93e-23
chr9	111145665	111146018	3.63	7.12	-3.49	6.29e-25	3.97e-23
chr14	74553331	74554112	8.37	11.15	-2.78	6.33e-25	4e-23
chr12	8884741	8885757	6.86	10.41	-3.55	6.34e-25	4e-23
chr17	31934000	31934276	3.79	7.87	-4.08	6.55e-25	4.13e-23
chr5	53950073	53950575	4.77	8.37	-3.6	7.04e-25	4.44e-23
chr18	4769105	4769910	5.89	10.25	-4.35	7.07e-25	4.45e-23
chr16	65448714	65449230	3.91	8.59	-4.68	7.24e-25	4.55e-23
chr8	114801479	114802132	5.35	8.4	-3.06	7.51e-25	4.72e-23
chr18	65586941	65587636	5.98	9.49	-3.51	7.67e-25	4.82e-23
chr14	55776801	55777187	4.17	7.58	-3.41	7.78e-25	4.89e-23
chr8	95226302	95227491	5.73	9.29	-3.56	7.98e-25	5.01e-23
chr9	47507901	47508782	7.19	10.14	-2.95	8.03e-25	5.04e-23
chr2	30547780	30548449	7.27	10.05	-2.78	8.21e-25	5.15e-23
chr7	109799066	109799686	5.27	8.27	-2.99	8.21e-25	5.15e-23
chrX	162730120	162730464	3.54	7.22	-3.67	8.34e-25	5.22e-23
chr15	73045055	73045591	4.38	7.92	-3.54	8.39e-25	5.25e-23
chr19	53111853	53112520	4.37	8.65	-4.28	8.64e-25	5.41e-23
chrJH584304.1	86127	86613	5.8	9.35	-3.55	8.74e-25	5.47e-23
chr7	143129167	143129860	5.76	8.83	-3.07	8.83e-25	5.52e-23
chr6	58677775	58678100	3.13	6.76	-3.62	9.58e-25	5.98e-23
chr7	138855318	138855952	3.9	8.35	-4.45	9.64e-25	6.01e-23
chr15	6871277	6872463	7.42	10.55	-3.14	1.01e-24	6.28e-23
chr9	98686448	98687105	4.66	8.15	-3.48	1.02e-24	6.33e-23
chr1	168191992	168192966	6.62	9.93	-3.32	1.03e-24	6.42e-23
chr6	53883086	53883518	4.87	8.92	-4.06	1.05e-24	6.53e-23
chr10	128039171	128039540	4.75	8.37	-3.63	1.09e-24	6.81e-23
chr4	133025062	133025736	4.51	8.48	-3.98	1.11e-24	6.9e-23
chr1	36760450	36760749	3.65	7.14	-3.5	1.13e-24	7.01e-23
chr10	70814182	70814645	4.77	8.01	-3.24	1.17e-24	7.26e-23
chr11	117101263	117102101	8.07	10.63	-2.56	1.18e-24	7.34e-23
chr3	14886013	14887107	8.69	11.15	-2.46	1.19e-24	7.41e-23
chr5	147646182	147646766	6.4	9.74	-3.35	1.2e-24	7.44e-23
chr7	116715066	116715758	4.52	8.38	-3.86	1.22e-24	7.55e-23
chr7	35335076	35335457	5.9	9.02	-3.12	1.22e-24	7.57e-23
chr8	127849745	127850454	5.13	9.22	-4.09	1.23e-24	7.59e-23
chr14	62174581	62175319	4.61	8.52	-3.91	1.25e-24	7.73e-23
chr6	129229660	129230593	8.26	11.3	-3.04	1.3e-24	8.05e-23
chr12	76944549	76945061	4.66	7.91	-3.24	1.32e-24	8.18e-23
chr5	147752859	147753519	5.64	9.84	-4.2	1.33e-24	8.24e-23
chrY	4838771	4839080	1.15	5.85	-4.7	1.34e-24	8.28e-23
chr10	21701429	21702063	5.18	9.03	-3.85	1.36e-24	8.37e-23
chr7	122287131	122287725	4.66	9.67	-5	1.38e-24	8.53e-23
chr10	53414007	53414837	5.29	9.3	-4.01	1.39e-24	8.54e-23
chr4	88196079	88196981	5.18	8.49	-3.31	1.39e-24	8.54e-23
chr11	80116383	80116892	3.65	7.82	-4.17	1.42e-24	8.74e-23
chr11	54567965	54568454	4.71	8.04	-3.33	1.43e-24	8.81e-23
chr5	75137616	75138178	4.45	7.7	-3.25	1.45e-24	8.88e-23
chr17	80645370	80645899	4.02	7.9	-3.88	1.47e-24	9.03e-23
chr3	153710592	153711376	6.54	9.82	-3.28	1.48e-24	9.08e-23
chr2	6162605	6163080	6.71	9.7	-3	1.48e-24	9.08e-23
chr13	99198646	99199043	4.16	7.48	-3.32	1.49e-24	9.16e-23
chr11	94872814	94873468	6.24	9.27	-3.03	1.5e-24	9.17e-23
chrJH584304.1	106771	106988	5.24	8.14	-2.9	1.56e-24	9.57e-23
chr4	120616677	120617064	4.07	8.22	-4.15	1.56e-24	9.57e-23
chr3	131367848	131368190	4.3	7.62	-3.32	1.59e-24	9.69e-23
chr13	63236252	63236851	5.45	8.6	-3.15	1.62e-24	9.9e-23
chr1	45925109	45926392	9.13	11.92	-2.79	1.63e-24	9.96e-23
chr11	111227852	111228442	4.23	8.97	-4.75	1.7e-24	1.04e-22
chr11	44975067	44975713	6.68	9.91	-3.23	1.71e-24	1.04e-22
chr3	131105754	131106753	7.76	10.59	-2.83	1.74e-24	1.06e-22
chr11	59952932	59953611	6.14	9.23	-3.09	1.78e-24	1.08e-22
chr8	22780035	22781046	6.48	9.43	-2.95	1.9e-24	1.15e-22
chr9	53786496	53787442	7.91	10.58	-2.67	1.94e-24	1.18e-22
chrY	5817379	5817774	0.2	5.52	-5.32	1.94e-24	1.18e-22
chr15	93485797	93486569	6.01	10.09	-4.07	1.96e-24	1.19e-22
chr8	87158363	87158696	4.39	8.13	-3.75	2e-24	1.21e-22
chr5	64324465	64324723	3.98	7.69	-3.71	2.06e-24	1.25e-22
chr6	63911057	63911564	3.68	7.71	-4.03	2.07e-24	1.25e-22
chr5	150166840	150167864	5.94	8.89	-2.95	2.18e-24	1.32e-22
chr10	67061357	67062268	6.65	9.42	-2.78	2.18e-24	1.32e-22
chrY	5276000	5276464	1.71	5.99	-4.28	2.19e-24	1.32e-22
chr5	134747489	134747940	4.79	8.4	-3.61	2.2e-24	1.33e-22
chr1	136494000	136494765	5.14	8.42	-3.28	2.29e-24	1.38e-22
chrX	126064138	126064641	1.86	6.33	-4.47	2.31e-24	1.39e-22
chr10	68263191	68263865	5.34	8.58	-3.24	2.33e-24	1.41e-22
chr5	73752104	73753034	7.01	10.8	-3.79	2.33e-24	1.41e-22
chrY	5271976	5272325	0.84	5.48	-4.63	2.35e-24	1.41e-22
chr19	23163361	23163949	5.14	8.98	-3.84	2.42e-24	1.46e-22
chr9	43729422	43729861	5.03	8.16	-3.14	2.43e-24	1.46e-22
chr7	71704794	71706058	9.59	12.06	-2.47	2.43e-24	1.46e-22
chr8	67967376	67968509	7.02	10.13	-3.11	2.5e-24	1.5e-22
chr5	64297064	64297529	4.51	8.26	-3.75	2.52e-24	1.51e-22
chr4	139631026	139631832	5.25	9.66	-4.4	2.54e-24	1.52e-22
chr2	134856276	134857160	5.99	9.9	-3.91	2.61e-24	1.57e-22
chr5	139220204	139221059	7.03	9.82	-2.78	2.7e-24	1.62e-22
chr7	19700652	19701623	7.59	10.72	-3.13	2.72e-24	1.63e-22
chr8	111582221	111582875	4.39	8.98	-4.6	2.77e-24	1.66e-22
chr19	32029715	32030397	4.39	8.36	-3.97	2.82e-24	1.69e-22
chr14	21805482	21805985	3.34	8.04	-4.7	2.9e-24	1.74e-22
chr8	46270664	46271126	4.39	8.08	-3.69	2.91e-24	1.74e-22
chr17	10366787	10367561	5.11	9.08	-3.97	2.98e-24	1.78e-22
chr5	67799709	67800316	5.77	9.37	-3.6	3.02e-24	1.8e-22
chr15	7398921	7399457	5.15	8.64	-3.5	3.05e-24	1.82e-22
chr19	6398409	6400118	8.17	11.03	-2.86	3.18e-24	1.9e-22
chr3	15040909	15041431	4.31	7.59	-3.28	3.24e-24	1.93e-22
chr13	92108265	92108649	4.35	7.7	-3.35	3.34e-24	1.99e-22
chr2	17812060	17812899	6.36	10.52	-4.16	3.38e-24	2.01e-22
chrX	48242873	48243429	4.34	8.58	-4.24	3.4e-24	2.02e-22
chr9	65789931	65790700	4.91	8.43	-3.52	3.42e-24	2.04e-22
chr4	138799893	138800639	5.32	8.87	-3.55	3.43e-24	2.04e-22
chr13	99182113	99183048	5.44	10.18	-4.74	3.46e-24	2.05e-22
chr14	7425409	7425769	2.88	6.63	-3.75	3.51e-24	2.08e-22
chr18	88993361	88993779	4.2	7.62	-3.42	3.52e-24	2.09e-22
chr2	169663706	169664745	6.76	9.75	-2.99	3.6e-24	2.13e-22
chr5	5297162	5297622	4.5	7.93	-3.43	3.6e-24	2.13e-22
chr14	70121512	70122102	5.06	9.23	-4.17	3.63e-24	2.15e-22
chr14	27250313	27250851	3.89	7.95	-4.06	3.64e-24	2.15e-22
chr9	107267772	107268371	4.62	8.18	-3.56	3.65e-24	2.16e-22
chr8	120188306	120189031	5.38	10.1	-4.72	3.68e-24	2.18e-22
chr13	107055832	107056775	6.73	9.5	-2.76	3.7e-24	2.19e-22
chr4	43919542	43920155	5.35	8.92	-3.57	3.7e-24	2.19e-22
chr14	30327141	30327681	4.44	7.75	-3.31	3.88e-24	2.29e-22
chr3	9624839	9625336	5.23	8.55	-3.32	3.9e-24	2.3e-22
chr5	77667983	77668492	4.54	8.11	-3.57	4e-24	2.36e-22
chr12	86836004	86837075	8.54	11.19	-2.65	4.02e-24	2.37e-22
chr5	20256817	20257743	4.72	8.78	-4.07	4.05e-24	2.38e-22
chr17	28029162	28030004	7.48	10.22	-2.74	4.07e-24	2.39e-22
chr18	39926358	39926705	2.96	7.1	-4.13	4.12e-24	2.42e-22
chr12	100281074	100281782	5.61	10.11	-4.51	4.21e-24	2.47e-22
chr13	3767111	3767412	4.04	8.37	-4.33	4.51e-24	2.64e-22
chr11	95789178	95789937	6.05	8.95	-2.9	4.72e-24	2.77e-22
chr14	64963635	64964903	6.87	9.82	-2.95	4.77e-24	2.79e-22
chr4	130175137	130175862	7.35	10.15	-2.81	4.9e-24	2.87e-22
chr1	136525514	136526136	5.46	8.97	-3.51	5e-24	2.93e-22
chr18	46176061	46176488	3.16	7.05	-3.89	5.08e-24	2.97e-22
chr5	139033516	139034347	7.17	10.12	-2.95	5.08e-24	2.97e-22
chr2	114701324	114701645	2.7	6.83	-4.14	5.14e-24	3e-22
chr1	71940912	71941336	3.71	8.16	-4.45	5.15e-24	3e-22
chr13	100532893	100533359	4.61	7.71	-3.1	5.2e-24	3.03e-22
chr4	43587652	43588200	5.59	8.82	-3.23	5.21e-24	3.03e-22
chr5	139364186	139365321	7.46	10.59	-3.13	5.23e-24	3.04e-22
chr11	6675329	6675977	5.64	9.58	-3.94	5.31e-24	3.09e-22
chr4	119021607	119022511	7.26	10.64	-3.38	5.37e-24	3.13e-22
chr12	80115164	80116047	7.68	10.29	-2.61	5.69e-24	3.31e-22
chr8	87152319	87152764	4.47	8.02	-3.55	5.7e-24	3.31e-22
chr13	31958722	31959264	5.37	8.4	-3.03	5.77e-24	3.35e-22
chr3	22138894	22139426	4.89	8.06	-3.17	5.87e-24	3.41e-22
chr9	34993315	34994389	8.62	11.29	-2.68	6.15e-24	3.57e-22
chr6	125089647	125090315	5.69	8.77	-3.08	6.36e-24	3.69e-22
chr5	118980922	118981620	7.04	9.96	-2.92	6.47e-24	3.75e-22
chr6	65855974	65856549	4.55	7.83	-3.28	6.48e-24	3.75e-22
chr6	34865675	34866339	8.04	10.57	-2.53	6.69e-24	3.87e-22
chr9	13607646	13608125	3.97	7.78	-3.81	6.75e-24	3.9e-22
chr1	131416902	131417500	3.72	7.69	-3.98	6.77e-24	3.91e-22
chr12	8436984	8437458	4.79	8.05	-3.26	6.91e-24	3.99e-22
chr15	99872760	99873150	4.4	8.31	-3.91	6.95e-24	4.01e-22
chr12	4007104	4008227	8.95	11.48	-2.53	7.11e-24	4.1e-22
chrX	85226712	85227476	5.43	8.31	-2.87	7.13e-24	4.11e-22
chr1	4432509	4432990	3.82	7.41	-3.59	7.15e-24	4.12e-22
chr5	134315668	134315971	5.85	8.81	-2.96	7.26e-24	4.18e-22
chrX	99052087	99052659	5.84	8.73	-2.88	7.28e-24	4.19e-22
chr3	69223528	69223991	4.81	8.33	-3.52	7.42e-24	4.27e-22
chr4	13248383	13249247	4.3	8.32	-4.02	7.64e-24	4.39e-22
chr13	101311908	101312327	3.71	7.52	-3.82	7.66e-24	4.4e-22
chr1	89467550	89468109	5.81	9.18	-3.37	7.66e-24	4.4e-22
chr2	17671468	17672111	5.7	9.16	-3.47	7.67e-24	4.4e-22
chr9	110652308	110652700	6.42	9.09	-2.67	7.82e-24	4.48e-22
chr11	108910413	108911338	5.57	9.11	-3.54	7.85e-24	4.5e-22
chr13	42905456	42906177	6.11	9.21	-3.1	7.96e-24	4.56e-22
chr9	22502829	22503300	4.52	7.54	-3.02	8.03e-24	4.59e-22
chr6	71710344	71710793	4.75	7.87	-3.12	8.65e-24	4.95e-22
chr6	5325044	5325607	4.81	8.06	-3.25	8.97e-24	5.13e-22
chr14	58812364	58813342	7.47	10.53	-3.06	9.02e-24	5.15e-22
chr1	155082931	155084047	9.46	11.88	-2.42	9.08e-24	5.18e-22
chr16	49909544	49909968	4.57	8.15	-3.57	9.22e-24	5.26e-22
chr8	75247175	75247857	4.33	9.57	-5.25	9.23e-24	5.26e-22
chr5	15678313	15679566	4.96	8	-3.04	9.51e-24	5.42e-22
chr14	11781104	11781542	4.54	8	-3.46	9.55e-24	5.44e-22
chr5	116409606	116410574	6.82	9.52	-2.71	9.65e-24	5.49e-22
chr7	144982703	144983125	4.28	7.81	-3.53	1.01e-23	5.72e-22
chr11	12374928	12375380	3.77	8.78	-5.01	1.04e-23	5.88e-22
chr11	67917062	67917484	4.8	7.89	-3.1	1.04e-23	5.89e-22
chr1	140430370	140431033	5.12	8.47	-3.35	1.04e-23	5.93e-22
chr6	37016838	37017326	4.19	7.88	-3.69	1.06e-23	6.01e-22
chr13	26404511	26405275	5.84	10.76	-4.92	1.06e-23	6.03e-22
chr4	95658777	95659201	3.65	7.21	-3.56	1.08e-23	6.09e-22
chrX	126078247	126078485	0.2	5.25	-5.05	1.08e-23	6.09e-22
chr18	35887556	35888679	8.29	11.7	-3.42	1.08e-23	6.09e-22
chr9	123833050	123833908	6.94	9.81	-2.87	1.1e-23	6.24e-22
chr5	123650489	123651127	4.52	9	-4.47	1.12e-23	6.35e-22
chr1	188670985	188671351	3.42	7.14	-3.73	1.15e-23	6.47e-22
chr1	76866311	76866999	6.49	9.57	-3.08	1.15e-23	6.51e-22
chr6	85442969	85443422	3.99	8.33	-4.34	1.16e-23	6.53e-22
chr2	155020325	155021563	4.75	10.26	-5.51	1.24e-23	6.99e-22
chr10	60090697	60091369	4.8	8.51	-3.71	1.3e-23	7.3e-22
chr14	74899709	74900416	6.47	9.77	-3.31	1.31e-23	7.36e-22
chr4	150259982	150260566	4.09	8.5	-4.41	1.32e-23	7.4e-22
chr17	56030040	56030655	6.04	8.84	-2.8	1.33e-23	7.47e-22
chr11	101896716	101897510	5.83	9.4	-3.56	1.35e-23	7.56e-22
chr11	101981880	101982191	5.52	8.32	-2.8	1.35e-23	7.56e-22
chr5	35746744	35747222	5.18	8.17	-2.99	1.35e-23	7.56e-22
chr9	6322173	6322655	3.6	8.01	-4.41	1.36e-23	7.61e-22
chr17	9927489	9928228	5.24	9.43	-4.18	1.36e-23	7.63e-22
chr8	120407741	120408791	7.36	10.18	-2.82	1.36e-23	7.63e-22
chr10	96149357	96149924	4.02	7.84	-3.82	1.37e-23	7.67e-22
chr10	20486424	20487304	7.44	10.48	-3.04	1.39e-23	7.77e-22
chr8	126610542	126611144	4.47	8.67	-4.2	1.39e-23	7.77e-22
chr9	115214348	115215165	6.55	9.51	-2.96	1.4e-23	7.8e-22
chr2	71765944	71766426	4.92	8.86	-3.94	1.42e-23	7.92e-22
chrX	134622902	134623815	6.1	8.94	-2.84	1.43e-23	7.99e-22
chr9	35238854	35239506	5.89	9.23	-3.35	1.46e-23	8.12e-22
chr7	67884266	67884920	4.45	9.65	-5.2	1.48e-23	8.25e-22
chr9	62407801	62408190	3.44	7.41	-3.96	1.48e-23	8.26e-22
chr18	12823898	12824431	5.24	9.03	-3.79	1.49e-23	8.31e-22
chr11	49657888	49658594	5.68	9.99	-4.3	1.51e-23	8.38e-22
chr6	48697196	48697920	5.7	9.24	-3.54	1.54e-23	8.57e-22
chr3	89869541	89870016	6.5	9.13	-2.63	1.6e-23	8.88e-22
chr5	35024215	35024900	5.75	9.5	-3.75	1.65e-23	9.17e-22
chr11	101360296	101361193	6.12	9.54	-3.42	1.65e-23	9.17e-22
chr5	119587210	119587759	4.46	9.23	-4.77	1.67e-23	9.27e-22
chr5	138801515	138802083	4.79	8.62	-3.82	1.68e-23	9.3e-22
chr17	29399204	29399571	4.97	8.02	-3.05	1.8e-23	9.98e-22
chr13	108239724	108240492	5.43	9.25	-3.82	1.81e-23	1e-21
chr2	132689712	132690079	5.48	8.37	-2.88	1.82e-23	1.01e-21
chrY	6370875	6371140	0.76	5.68	-4.92	1.83e-23	1.01e-21
chr10	125725240	125726211	7.66	10.41	-2.75	1.84e-23	1.02e-21
chr3	30480486	30481190	5.87	8.92	-3.06	1.95e-23	1.08e-21
chr7	135141614	135142087	3.69	8.18	-4.49	1.97e-23	1.09e-21
chr8	121382538	121383290	6.41	9.08	-2.66	2e-23	1.11e-21
chr11	63123998	63124684	5.96	9.38	-3.42	2.01e-23	1.11e-21
chr6	3424618	3425398	4.75	8	-3.25	2.13e-23	1.18e-21
chr2	134815351	134815916	3.86	8.41	-4.54	2.14e-23	1.18e-21
chr6	71504056	71504670	5.92	9	-3.08	2.25e-23	1.24e-21
chr1	59888046	59888368	3.26	6.97	-3.71	2.28e-23	1.26e-21
chr10	41883957	41884529	6.19	9.59	-3.4	2.34e-23	1.29e-21
chr2	174740147	174740587	4.58	8.03	-3.45	2.39e-23	1.31e-21
chr7	38191158	38191589	4.64	9.41	-4.77	2.44e-23	1.34e-21
chrX	126029603	126030067	1.8	5.9	-4.1	2.46e-23	1.35e-21
chrX	20934246	20934680	3.13	7.73	-4.6	2.58e-23	1.42e-21
chr18	33463629	33464571	9.17	11.69	-2.52	2.63e-23	1.44e-21
chr10	124261090	124261404	3.06	6.98	-3.92	2.66e-23	1.46e-21
chrX	14735430	14736023	4.89	8.33	-3.43	2.66e-23	1.46e-21
chr2	25266143	25267044	6.37	9.71	-3.34	2.67e-23	1.46e-21
chr10	84416482	84417304	7.58	10.16	-2.58	2.72e-23	1.49e-21
chr2	29666658	29667055	4.67	7.94	-3.27	2.77e-23	1.52e-21
chr10	99697432	99698107	4.85	8.19	-3.34	2.82e-23	1.54e-21
chr12	79936433	79937359	7.84	10.37	-2.53	2.9e-23	1.59e-21
chr9	89997163	89997757	4.58	8.14	-3.56	2.96e-23	1.62e-21
chrY	8961233	8961513	0.9	5.43	-4.53	3.03e-23	1.65e-21
chr12	83128000	83128579	4.12	8.15	-4.03	3.04e-23	1.66e-21
chr3	131085713	131086430	7.25	10.35	-3.1	3.09e-23	1.69e-21
chr8	4507457	4507997	5.56	8.41	-2.85	3.1e-23	1.69e-21
chr13	73441032	73441476	4.17	8.05	-3.88	3.15e-23	1.72e-21
chr7	64042829	64043647	5.98	9.13	-3.15	3.21e-23	1.75e-21
chr16	58499026	58499454	5.08	8.64	-3.56	3.21e-23	1.75e-21
chr11	103706924	103707611	6.18	9.26	-3.08	3.32e-23	1.81e-21
chr2	139613384	139613771	3.55	7.34	-3.78	3.36e-23	1.83e-21
chr14	10797615	10798192	3.84	7.71	-3.87	3.41e-23	1.86e-21
chr1	78570508	78570821	3.23	6.97	-3.74	3.42e-23	1.86e-21
chrX	14647113	14647463	3.46	6.95	-3.49	3.45e-23	1.87e-21
chr3	107923330	107923919	5.85	9.8	-3.95	3.49e-23	1.89e-21
chr2	65193061	65193859	7.09	10.13	-3.04	3.59e-23	1.95e-21
chr12	15777044	15777718	5.54	9.91	-4.37	3.67e-23	1.99e-21
chr7	46012934	46013966	8.76	12.27	-3.51	3.73e-23	2.02e-21
chr7	110680902	110681610	3.62	8.41	-4.79	3.77e-23	2.04e-21
chr15	80050115	80050588	5.31	8.41	-3.1	3.93e-23	2.13e-21
chr10	44457145	44457601	5.48	8.41	-2.93	3.96e-23	2.14e-21
chr9	2999901	3000468	5.74	8.83	-3.08	4.01e-23	2.17e-21
chr10	112082039	112082659	4.73	8.52	-3.79	4.01e-23	2.17e-21
chr8	36472809	36473470	5.54	9.13	-3.59	4.1e-23	2.21e-21
chr1	89999718	90000271	4.47	9.48	-5	4.12e-23	2.22e-21
chr6	99020732	99021419	5.84	8.93	-3.09	4.14e-23	2.23e-21
chr7	83565901	83566585	7.75	10.37	-2.62	4.22e-23	2.27e-21
chr2	178528412	178528999	2.19	6.4	-4.21	4.22e-23	2.27e-21
chr6	141845887	141846414	3.93	7.59	-3.66	4.25e-23	2.29e-21
chr12	19273107	19273555	1.19	5.68	-4.49	4.32e-23	2.32e-21
chr5	119058111	119059069	8.23	11.14	-2.9	4.32e-23	2.32e-21
chr6	145578280	145579225	6.85	9.59	-2.74	4.35e-23	2.34e-21
chr7	109507057	109507800	6.1	8.86	-2.77	4.42e-23	2.37e-21
chr9	104042244	104042813	4.82	8.81	-4	4.43e-23	2.38e-21
chr3	138612469	138612894	3.57	7.38	-3.81	4.64e-23	2.49e-21
chr2	4169204	4169968	5.12	8.46	-3.34	4.66e-23	2.5e-21
chr8	22267457	22267802	3.32	6.96	-3.63	4.73e-23	2.54e-21
chr3	37753210	37753495	3.86	7.34	-3.48	4.76e-23	2.55e-21
chr18	61776509	61777135	4.59	8.55	-3.96	4.95e-23	2.65e-21
chr11	44891215	44891654	4.05	7.3	-3.25	4.96e-23	2.65e-21
chr13	26482755	26483186	3.15	7.87	-4.72	5.01e-23	2.68e-21
chr8	91948997	91949690	6.43	9.11	-2.68	5.03e-23	2.69e-21
chr9	45958860	45959330	5.88	9.07	-3.18	5.13e-23	2.74e-21
chr5	32183181	32183835	4.34	8.97	-4.63	5.15e-23	2.75e-21
chr13	24709675	24710047	4.04	8.18	-4.14	5.2e-23	2.77e-21
chr3	148907842	148908244	4.91	7.86	-2.95	5.38e-23	2.87e-21
chr13	112764531	112765032	4.42	7.93	-3.5	5.4e-23	2.88e-21
chr2	181917351	181918017	6.44	9.32	-2.88	5.41e-23	2.88e-21
chr7	133446835	133447434	4.15	8.09	-3.94	5.57e-23	2.96e-21
chr4	133675600	133676051	5.42	8.71	-3.29	5.65e-23	3e-21
chr14	122650971	122651228	2.62	6.73	-4.11	5.7e-23	3.03e-21
chr2	136947926	136948350	3.96	7.71	-3.75	5.95e-23	3.16e-21
chr1	163823025	163823329	3.13	7.11	-3.98	5.98e-23	3.17e-21
chr13	3769998	3770547	5.46	8.89	-3.43	6.05e-23	3.21e-21
chr3	135513294	135514535	7.35	10.06	-2.71	6.18e-23	3.27e-21
chr6	146207301	146207759	4.52	7.57	-3.06	6.28e-23	3.33e-21
chr1	4653757	4654608	6.19	10	-3.81	6.47e-23	3.42e-21
chr4	57812707	57813281	5.92	9.06	-3.14	6.72e-23	3.55e-21
chr1	62181522	62182084	5.38	8.8	-3.42	6.79e-23	3.59e-21
chr7	40773388	40774368	5.67	9.99	-4.31	6.86e-23	3.62e-21
chr9	114843581	114844752	8.23	10.72	-2.49	6.98e-23	3.69e-21
chr15	74212340	74212804	5.4	9.06	-3.65	6.99e-23	3.69e-21
chr7	73666862	73667778	6.03	9.55	-3.52	7.16e-23	3.77e-21
chr2	72283341	72283674	2.81	7.58	-4.77	7.2e-23	3.79e-21
chrX	103511677	103512139	4.73	8.06	-3.33	7.24e-23	3.81e-21
chr5	65224114	65224526	3.93	7.51	-3.58	7.25e-23	3.82e-21
chrY	9496092	9496428	0.3	5.29	-4.99	7.32e-23	3.85e-21
chrX	6602937	6603605	5.17	8.42	-3.25	7.34e-23	3.86e-21
chr2	137114204	137115175	9.23	11.57	-2.34	7.63e-23	4.01e-21
chr18	69653410	69653922	4.34	7.8	-3.46	7.67e-23	4.03e-21
chr15	84267671	84268271	6.11	9.98	-3.87	7.74e-23	4.06e-21
chr8	94172029	94172945	8.26	10.68	-2.41	7.93e-23	4.16e-21
chr6	99643801	99644295	4.83	7.97	-3.13	8.04e-23	4.22e-21
chr2	59401602	59402423	7.72	11.26	-3.55	8.17e-23	4.28e-21
chr4	149526215	149526794	6.05	9.33	-3.28	8.24e-23	4.31e-21
chr10	8071854	8072463	4.56	8.31	-3.75	8.52e-23	4.46e-21
chr3	48668499	48668814	3.53	7.2	-3.66	8.71e-23	4.55e-21
chr1	36611467	36611931	4.68	8.22	-3.54	8.73e-23	4.57e-21
chr8	103895636	103896253	4	8.54	-4.54	8.78e-23	4.59e-21
chr15	38374692	38375263	6.35	10.05	-3.7	8.94e-23	4.67e-21
chr5	83354773	83355420	6.33	9.47	-3.14	8.99e-23	4.69e-21
chr16	76299502	76299978	4.21	7.68	-3.48	9.02e-23	4.71e-21
chr6	84191614	84192005	4.43	7.68	-3.25	9.22e-23	4.81e-21
chr14	12099551	12100672	7.81	10.69	-2.88	9.8e-23	5.1e-21
chr7	16808700	16809175	4.58	8.33	-3.75	1e-22	5.21e-21
chr1	184869871	184870691	5.92	9.78	-3.86	1.02e-22	5.28e-21
chr1	95691989	95692247	3.4	6.85	-3.44	1.03e-22	5.35e-21
chr6	66338759	66339159	3.23	6.89	-3.66	1.04e-22	5.4e-21
chr15	59174297	59175049	5.29	10.31	-5.02	1.08e-22	5.59e-21
chr17	54759739	54760124	2.68	6.57	-3.88	1.1e-22	5.69e-21
chrX	159868929	159869520	4.73	7.85	-3.13	1.1e-22	5.71e-21
chr5	118490977	118491421	4	7.36	-3.36	1.11e-22	5.74e-21
chr9	43993558	43994221	5.63	8.64	-3.01	1.22e-22	6.31e-21
chr2	70505309	70506243	6.93	9.69	-2.75	1.28e-22	6.63e-21
chr1	152499587	152500188	6.05	8.89	-2.84	1.31e-22	6.79e-21
chr13	43786314	43786981	5.46	8.89	-3.43	1.32e-22	6.83e-21
chr1	180408745	180409257	6.98	9.88	-2.9	1.34e-22	6.93e-21
chr1	165684047	165685154	7.28	10.98	-3.7	1.43e-22	7.37e-21
chr13	6137360	6137677	3.75	7.01	-3.26	1.44e-22	7.4e-21
chr11	101034586	101035187	6.05	9.05	-3	1.53e-22	7.89e-21
chr13	77438816	77439157	5.54	8.43	-2.88	1.55e-22	7.97e-21
chr9	92210672	92211589	6.33	9.4	-3.06	1.55e-22	7.97e-21
chr18	65081945	65082336	3.6	7.4	-3.8	1.64e-22	8.43e-21
chrX	14628058	14629026	7.15	10.17	-3.03	1.64e-22	8.44e-21
chr19	34283538	34284094	5.45	8.39	-2.93	1.66e-22	8.54e-21
chr18	57362284	57362851	3.72	7.47	-3.75	1.72e-22	8.82e-21
chrX	126028573	126028848	1.65	5.92	-4.27	1.73e-22	8.91e-21
chr6	31370581	31371617	7.13	10.02	-2.89	1.74e-22	8.94e-21
chr17	47319111	47319562	4.4	7.75	-3.35	1.76e-22	9.01e-21
chr11	5413674	5413971	3.27	6.89	-3.62	1.81e-22	9.28e-21
chr3	131976969	131977222	3.11	6.71	-3.6	1.88e-22	9.61e-21
chr9	14206906	14208077	6.49	9.58	-3.1	1.92e-22	9.83e-21
chr5	128576052	128576809	6.07	9.83	-3.77	1.93e-22	9.88e-21
chr7	109276530	109277127	4.83	9.44	-4.61	1.96e-22	1e-20
chr16	85146619	85147285	4.7	9.1	-4.4	2e-22	1.02e-20
chr14	19733791	19734427	4.29	7.75	-3.46	2.04e-22	1.04e-20
chr6	43568767	43569079	3.33	7.17	-3.83	2.04e-22	1.04e-20
chr4	98243893	98244493	4.93	9	-4.07	2.07e-22	1.05e-20
chr14	6169985	6170237	1.44	5.64	-4.2	2.08e-22	1.06e-20
chr9	59939695	59940236	4.81	8.28	-3.47	2.09e-22	1.07e-20
chr12	35836726	35837440	6.54	9.18	-2.64	2.15e-22	1.09e-20
chr5	135533295	135533952	6.07	9.57	-3.5	2.16e-22	1.1e-20
chr10	52529892	52530310	3.88	7.89	-4.01	2.18e-22	1.11e-20
chr14	6168179	6168487	1.74	5.88	-4.15	2.2e-22	1.12e-20
chr10	63057324	63057782	4.72	8.1	-3.38	2.21e-22	1.13e-20
chr9	58139751	58140877	6.6	10.68	-4.09	2.23e-22	1.14e-20
chr4	142633399	142634480	5.25	9.41	-4.17	2.26e-22	1.15e-20
chr11	76546724	76547414	5.57	8.64	-3.06	2.26e-22	1.15e-20
chr9	7750332	7750810	3.83	7.71	-3.88	2.33e-22	1.18e-20
chr9	33101269	33101611	3.42	6.88	-3.46	2.39e-22	1.21e-20
chr9	20543859	20545146	8.67	11.05	-2.37	2.39e-22	1.21e-20
chr14	121052908	121053520	6.08	8.79	-2.7	2.45e-22	1.24e-20
chr8	121912050	121912608	4.63	9.67	-5.04	2.46e-22	1.25e-20
chr7	16660780	16661353	3.67	7.3	-3.62	2.48e-22	1.25e-20
chr15	94220755	94221230	5.11	8.17	-3.07	2.49e-22	1.26e-20
chr13	45820418	45821191	8.15	10.67	-2.51	2.49e-22	1.26e-20
chr2	167670987	167671642	5.61	9.02	-3.42	2.5e-22	1.27e-20
chr8	84722775	84723358	6.14	9.31	-3.17	2.58e-22	1.3e-20
chr2	127639307	127639927	4.92	8.73	-3.81	2.61e-22	1.32e-20
chr5	74062193	74062584	4.68	8.07	-3.39	2.61e-22	1.32e-20
chr1	182500171	182500733	6.02	9.36	-3.34	2.68e-22	1.35e-20
chr17	17496051	17496561	3.42	7.16	-3.74	2.7e-22	1.36e-20
chr8	15018100	15019165	7.88	10.49	-2.61	2.73e-22	1.38e-20
chr8	8603812	8604286	3.93	7.33	-3.4	2.75e-22	1.38e-20
chr12	112186885	112187196	4.76	7.78	-3.02	2.83e-22	1.42e-20
chr5	20286038	20286887	5.24	10.16	-4.92	2.83e-22	1.42e-20
chr7	38199884	38200180	3.53	7.77	-4.25	2.84e-22	1.43e-20
chr7	89483796	89484457	4.84	9.07	-4.22	2.85e-22	1.43e-20
chr2	137244037	137244327	3.83	7.1	-3.27	2.88e-22	1.44e-20
chr8	80923687	80924272	4.77	7.71	-2.94	2.93e-22	1.47e-20
chr2	60409196	60409559	3.46	7.35	-3.89	2.94e-22	1.47e-20
chr14	31933971	31934279	4.08	7.47	-3.39	2.95e-22	1.48e-20
chr11	98748339	98748783	5.33	8.46	-3.14	3.04e-22	1.52e-20
chr12	113132444	113133434	7.02	10.49	-3.47	3.21e-22	1.61e-20
chr4	46276858	46277644	7.14	9.95	-2.81	3.26e-22	1.63e-20
chr9	95221299	95221795	4.13	7.28	-3.16	3.28e-22	1.64e-20
chr1	11089443	11090074	5.78	8.96	-3.18	3.29e-22	1.65e-20
chr10	99261293	99262343	9.53	11.84	-2.32	3.29e-22	1.65e-20
chr9	116338038	116338620	4.71	7.88	-3.17	3.29e-22	1.65e-20
chr2	131215807	131216404	5.74	8.72	-2.98	3.3e-22	1.65e-20
chr12	108237406	108237967	5.43	8.8	-3.37	3.32e-22	1.66e-20
chr7	39197643	39197971	2.57	6.61	-4.04	3.41e-22	1.7e-20
chr4	55672153	55672877	6.86	9.69	-2.83	3.42e-22	1.7e-20
chr2	65123668	65124256	4.92	8.56	-3.64	3.46e-22	1.72e-20
chr7	113150595	113151254	7.4	9.98	-2.58	3.57e-22	1.78e-20
chr10	80159164	80159522	6.43	9	-2.57	3.63e-22	1.81e-20
chr5	128904731	128905289	4.79	8.68	-3.89	3.64e-22	1.81e-20
[truncated: 14,761 more rows]

## Sheet: B) Cultured EC unique peaks
Chr	Start	End	log_of_mean_reads_in_cultured_ECs	log_of_mean_reads_in_adult_brain_ECs	Fold	p-value	FDR
chr9	8558456	8559257	9.51	0.53	8.99	2.44e-49	1.33e-46
chr9	8543899	8544905	8.27	0.53	7.74	8.24e-31	8.56e-29
chr19	24994819	24995385	9.81	5.07	4.74	1.01e-30	1.05e-28
chr17	33981018	33981675	8.35	1.1	7.25	3.62e-29	3.26e-27
chr5	104380513	104380982	9.09	4.53	4.56	1.8e-28	1.54e-26
chr4	84523171	84524306	10.8	6.98	3.82	1.85e-28	1.58e-26
chr9	24943527	24944456	10.11	6.12	3.98	3.43e-28	2.87e-26
chr6	117544208	117545132	9.91	4.83	5.08	4.19e-28	3.46e-26
chr1	24553399	24554098	10.1	5.28	4.82	2.05e-27	1.61e-25
chr7	12905132	12905754	9.82	5.48	4.33	2.36e-27	1.84e-25
chr6	18270915	18271590	9.57	5	4.58	8.67e-27	6.43e-25
chr3	126831335	126832103	10.87	6.96	3.91	1.12e-26	8.25e-25
chr2	84961043	84961966	9.77	5.65	4.12	3.22e-26	2.28e-24
chr9	89874094	89874923	9.73	5.92	3.81	3.55e-26	2.51e-24
chr10	86612115	86612954	9.08	5.12	3.96	4.63e-26	3.24e-24
chr8	8274953	8275504	9.48	5.22	4.26	6.97e-26	4.8e-24
chr17	78387521	78388071	9.07	4.95	4.13	4.9e-25	3.12e-23
chr1	166968192	166968728	9.18	5.36	3.82	5.77e-25	3.66e-23
chr18	73898183	73898905	8.63	4.7	3.93	1.57e-24	9.62e-23
chr17	74570404	74571041	8.7	3.69	5.01	1.7e-24	1.04e-22
chr3	61441229	61441979	9.61	5.29	4.32	3e-24	1.79e-22
chr11	19221384	19222009	9.27	5.33	3.94	4.04e-24	2.38e-22
chr4	47310629	47311281	9.7	6.11	3.59	4.15e-24	2.44e-22
chr14	74327184	74327828	9.6	5.15	4.46	4.31e-24	2.53e-22
chr10	122891408	122891936	8.7	4.69	4.01	4.88e-24	2.86e-22
chr12	107645168	107645947	9.61	6.18	3.43	7.22e-24	4.16e-22
chr8	126188547	126189372	9.28	5.48	3.79	7.78e-24	4.46e-22
chr18	24629643	24630418	9.24	5.39	3.85	8.98e-24	5.13e-22
chr1	189215003	189215796	9.31	5.88	3.43	9.67e-24	5.5e-22
chr11	7237649	7238229	9.92	6.18	3.74	1.12e-23	6.34e-22
chr11	58334604	58335197	9.64	5.37	4.26	1.23e-23	6.92e-22
chr14	5961015	5962127	7.71	0.53	7.18	1.47e-23	8.19e-22
chr5	21144393	21145052	10.41	6.78	3.62	3.6e-23	1.95e-21
chr18	80464471	80465210	9.79	6.21	3.58	4.73e-23	2.54e-21
chr7	70266917	70267507	9.6	6.09	3.51	4.88e-23	2.61e-21
chrX	57935362	57936248	9.05	5.1	3.95	4.99e-23	2.67e-21
chr6	137783838	137784609	9.57	6.14	3.42	5.53e-23	2.94e-21
chr17	17792418	17793152	9.09	5.12	3.98	5.84e-23	3.1e-21
chr14	33247389	33248121	10.33	6.95	3.38	6.02e-23	3.19e-21
chr9	22164506	22165277	7.59	0.53	7.06	6.42e-23	3.4e-21
chr13	28457335	28457904	9.43	5.72	3.72	7.16e-23	3.77e-21
chr3	93537025	93537717	10.27	5.9	4.37	9.29e-23	4.84e-21
chr1	72070443	72071005	9.39	5.04	4.35	9.4e-23	4.9e-21
chr12	104415464	104416225	9.7	5.31	4.39	9.56e-23	4.98e-21
chr1	71004112	71004720	9.45	5.19	4.26	1.02e-22	5.28e-21
chr15	97560063	97560605	9.02	5.4	3.61	1.03e-22	5.33e-21
chr6	142275633	142276478	9.55	5.21	4.34	1.1e-22	5.7e-21
chr11	82006715	82007465	9.85	6.61	3.23	1.81e-22	9.3e-21
chr8	32199664	32200461	9.33	5.74	3.59	2.03e-22	1.04e-20
chr1	31156833	31157386	8.67	4.81	3.86	2.17e-22	1.11e-20
chr4	8917113	8917660	9.3	5.45	3.86	2.73e-22	1.37e-20
chr2	141587089	141587757	9.77	6.19	3.58	3.3e-22	1.65e-20
chr16	52000031	52000639	9.63	5.39	4.24	3.33e-22	1.66e-20
chr19	58104342	58105109	9.83	6.57	3.26	4.48e-22	2.21e-20
chr8	60773146	60773930	10.33	6.28	4.05	4.63e-22	2.28e-20
chr12	71936496	71937137	8.94	5.55	3.39	5.96e-22	2.91e-20
chr2	84549415	84550205	8.91	5.33	3.58	6.02e-22	2.94e-20
chr7	105498690	105499427	9.34	5.93	3.41	6.38e-22	3.11e-20
chr5	77217695	77218273	9.5	5.59	3.91	6.57e-22	3.19e-20
chr2	139937536	139938096	9.08	4.8	4.28	6.85e-22	3.32e-20
chr3	51220802	51221213	9.14	4.67	4.47	7.52e-22	3.62e-20
chr10	27863338	27864104	9.03	5.36	3.67	8.54e-22	4.1e-20
chrX	169123155	169124104	8.62	5.01	3.61	9.94e-22	4.73e-20
chr14	44256345	44257397	7.57	0.53	7.05	1.15e-21	5.45e-20
chr4	64077988	64078580	9.63	5.29	4.34	1.31e-21	6.14e-20
chr9	75196241	75196787	9.35	5.75	3.6	1.37e-21	6.41e-20
chr17	67326531	67327176	9.15	4.96	4.18	1.43e-21	6.7e-20
chr1	153202114	153202636	8.99	5.02	3.96	1.5e-21	6.99e-20
chr9	67565610	67566379	9.44	6.25	3.18	1.52e-21	7.1e-20
chr11	52079905	52080472	8.79	5.12	3.67	1.56e-21	7.26e-20
chr6	100799238	100800105	9.57	5.92	3.65	2.36e-21	1.09e-19
chr3	109010486	109011590	9.84	6.74	3.1	2.9e-21	1.33e-19
chr1	161392827	161393567	9.71	6.32	3.39	3.8e-21	1.72e-19
chr13	35395048	35396105	10	6.84	3.16	3.87e-21	1.75e-19
chr3	70807123	70807588	9.04	5.2	3.84	4.07e-21	1.84e-19
chr17	78392229	78393129	10.14	6.36	3.78	4.12e-21	1.86e-19
chr10	71409853	71410516	9.76	6.31	3.45	4.52e-21	2.03e-19
chr19	53412030	53412819	9.4	5.71	3.7	4.65e-21	2.09e-19
chr13	59419799	59420504	7.25	1.12	6.13	5.04e-21	2.25e-19
chr8	32286340	32287083	9.28	5.71	3.57	5.45e-21	2.42e-19
chr6	112576983	112577838	9.96	6.65	3.31	6.71e-21	2.97e-19
chr2	84404794	84405243	8.07	4	4.07	6.9e-21	3.04e-19
chr11	59458703	59459493	9.79	6.17	3.62	7.63e-21	3.35e-19
chr2	8770465	8771070	8.98	5.35	3.62	8.67e-21	3.79e-19
chr17	36886494	36887060	8.02	3.54	4.48	8.77e-21	3.83e-19
chr2	68222188	68222903	9.99	6.49	3.49	9.87e-21	4.3e-19
chr12	68511684	68512391	9.59	5.86	3.73	1.03e-20	4.46e-19
chr2	3238886	3239807	9.92	6.38	3.54	1.12e-20	4.85e-19
chr13	75824625	75825717	10.44	6.97	3.48	1.16e-20	5.01e-19
chr15	95823744	95824591	9.71	6.42	3.29	1.21e-20	5.23e-19
chr13	64421438	64422626	9.54	6.46	3.09	1.25e-20	5.35e-19
chr12	117867443	117868597	10.38	6.12	4.25	1.26e-20	5.42e-19
chr9	44904833	44905483	8.91	5.7	3.21	1.28e-20	5.5e-19
chr16	45110408	45111257	9.55	6.28	3.27	1.33e-20	5.71e-19
chr16	23456249	23457150	10.2	6.9	3.29	1.37e-20	5.86e-19
chr7	118481029	118481961	9.7	6.37	3.33	1.38e-20	5.9e-19
chr13	17604500	17605166	8.84	5.21	3.63	1.45e-20	6.17e-19
chr4	87840197	87840845	9.55	5.31	4.23	1.69e-20	7.17e-19
chr3	36468832	36469412	9.59	6.18	3.41	1.74e-20	7.37e-19
chr4	8906633	8907429	9.96	6.99	2.98	2.03e-20	8.54e-19
chr15	58927536	58928044	9.02	5.09	3.93	2.06e-20	8.65e-19
chr1	166787733	166788507	9.02	5.57	3.45	2.1e-20	8.8e-19
chr2	63994177	63994617	7.69	3.52	4.17	2.28e-20	9.54e-19
chr6	66848516	66849420	9.76	6.13	3.63	2.59e-20	1.08e-18
chr4	95001230	95001937	8.83	5.26	3.58	2.85e-20	1.18e-18
chr13	58458621	58459372	8.68	4.93	3.75	3.16e-20	1.3e-18
chr13	16487062	16487679	9.01	5.23	3.78	3.23e-20	1.33e-18
chr9	28578613	28579152	8.61	4.99	3.62	3.38e-20	1.39e-18
chr6	29436472	29437090	9.5	6.43	3.07	3.7e-20	1.51e-18
chr3	36467631	36468021	8.6	5.01	3.59	3.73e-20	1.53e-18
chr10	78565597	78566176	8.97	4.57	4.39	3.92e-20	1.6e-18
chr4	43398643	43399422	9.83	6.27	3.56	4.08e-20	1.66e-18
chr17	44709684	44710646	9.13	5.98	3.15	4.11e-20	1.67e-18
chr13	17975837	17976370	8.52	5.01	3.51	4.22e-20	1.71e-18
chr3	31022761	31023543	10.16	5.64	4.52	4.49e-20	1.81e-18
chr10	79106134	79107172	10.02	6.49	3.54	4.89e-20	1.97e-18
chr1	13639316	13640096	8.76	5.33	3.43	5.15e-20	2.07e-18
chr16	92620524	92621467	9.7	6.78	2.91	5.41e-20	2.17e-18
chr7	64276665	64277464	9.29	5.49	3.8	5.75e-20	2.3e-18
chr12	17220487	17221097	9.47	6.23	3.24	5.87e-20	2.35e-18
chr16	97872231	97873127	10.48	7	3.49	6.12e-20	2.44e-18
chr1	177014058	177015437	10.48	7.15	3.33	6.45e-20	2.57e-18
chr11	16591376	16592383	10.75	7.78	2.97	7.29e-20	2.89e-18
chr13	47335788	47336639	9.7	5.94	3.76	7.33e-20	2.91e-18
chr14	43925015	43925865	8.36	4.66	3.7	7.86e-20	3.1e-18
chr2	118287488	118288219	9.42	5.69	3.72	8e-20	3.16e-18
chrX	51140056	51140771	8.33	4.44	3.89	8.39e-20	3.3e-18
chrX	103366093	103366588	7.71	3.84	3.87	8.79e-20	3.45e-18
chr15	96035149	96035790	9.06	5.65	3.41	8.94e-20	3.51e-18
chr10	66864132	66864983	10.24	7.16	3.08	9.5e-20	3.71e-18
chr16	26064988	26065532	9.39	5.96	3.43	9.93e-20	3.88e-18
chrX	6258401	6258983	8.5	5.23	3.27	1.07e-19	4.15e-18
chrX	37850622	37851352	8.7	4.98	3.72	1.17e-19	4.55e-18
chr19	8982692	8983746	10.6	6.88	3.72	1.23e-19	4.78e-18
chr18	14330418	14331017	9.49	6.16	3.33	1.26e-19	4.89e-18
chr8	64725967	64726977	10.16	6.77	3.4	1.28e-19	4.93e-18
chr3	60513281	60513780	8.52	5.33	3.19	1.31e-19	5.08e-18
chr9	117571131	117571879	9.34	5.87	3.47	1.37e-19	5.3e-18
chr4	5792985	5793757	9.61	6.15	3.46	1.4e-19	5.39e-18
chr14	47634063	47634827	9.27	5.94	3.33	1.42e-19	5.46e-18
chr13	32678810	32679401	8.99	5.56	3.42	1.47e-19	5.65e-18
chr6	116912061	116912693	7.81	2.98	4.83	1.49e-19	5.74e-18
chr12	36186917	36187605	9.72	6.02	3.71	1.58e-19	6.05e-18
chr7	87241114	87241584	8.63	4.96	3.66	1.59e-19	6.1e-18
chr2	146872572	146873170	9.31	6.25	3.06	1.76e-19	6.74e-18
chr3	126335309	126335781	8.26	4.67	3.59	1.86e-19	7.1e-18
chr2	76504210	76504990	9.46	6.05	3.41	2.1e-19	8e-18
chrX	103381505	103382010	8	4.11	3.89	2.32e-19	8.77e-18
chr4	54877135	54877825	9.06	5.12	3.94	2.37e-19	8.96e-18
chr2	155878817	155879459	8.57	5.2	3.36	2.97e-19	1.11e-17
chr8	92846793	92847954	10.42	7.28	3.14	3.04e-19	1.14e-17
chr10	85739291	85740138	9.4	6.22	3.18	3.08e-19	1.15e-17
chr15	72836753	72837630	9.18	6.03	3.15	3.25e-19	1.21e-17
chr11	121090789	121091429	8.16	4.66	3.51	3.36e-19	1.25e-17
chr14	86254137	86254676	8.82	5.59	3.24	3.67e-19	1.36e-17
chr6	50254645	50255389	9.38	6.28	3.1	3.77e-19	1.4e-17
chr16	17542436	17543126	8.8	4.85	3.95	4.02e-19	1.49e-17
chr1	10592453	10593418	9.33	6.13	3.2	4.3e-19	1.58e-17
chr7	43788078	43788641	9.85	5.42	4.44	4.42e-19	1.62e-17
chr1	91956049	91956696	9.48	6.08	3.4	4.42e-19	1.62e-17
chr5	90689275	90690403	10.32	6.97	3.35	5.33e-19	1.94e-17
chr11	83039128	83039560	8.15	3.52	4.63	5.43e-19	1.97e-17
chr14	45325462	45325854	7.81	4.1	3.71	6.05e-19	2.19e-17
chr6	43342923	43343668	8.97	5.97	3	6.62e-19	2.39e-17
chr14	79065539	79066083	9.03	5.3	3.73	6.77e-19	2.44e-17
chr7	123082235	123082643	8.13	4.73	3.4	7.39e-19	2.65e-17
chr15	7597266	7598104	9.32	6.23	3.1	7.55e-19	2.71e-17
chr14	46989207	46990096	8.65	5.17	3.47	7.77e-19	2.78e-17
chr1	51789256	51789856	8.24	4.77	3.46	8.56e-19	3.04e-17
chr5	43571654	43572173	8.3	4.11	4.19	8.61e-19	3.06e-17
chr4	55731990	55732392	8.07	4.61	3.46	8.62e-19	3.06e-17
chr11	17468309	17469541	10.14	6.81	3.33	8.82e-19	3.13e-17
chrX	167132807	167133544	8.2	4.38	3.82	9.93e-19	3.51e-17
chr2	122716064	122716773	8.27	4.99	3.28	1e-18	3.53e-17
chr9	107278343	107278965	9.72	6.1	3.62	1.01e-18	3.57e-17
chr13	38349780	38350230	8.49	4.89	3.59	1.03e-18	3.63e-17
chr4	138213853	138214314	8.6	5.51	3.09	1.05e-18	3.69e-17
chr2	83676196	83676849	8.23	4.58	3.65	1.1e-18	3.85e-17
chr3	52443638	52444389	10.19	7.26	2.93	1.1e-18	3.87e-17
chr10	45820964	45821800	8.77	5.76	3.01	1.16e-18	4.08e-17
chr15	85424154	85424619	8.6	4.89	3.71	1.25e-18	4.35e-17
chr9	73952287	73952836	8.88	5.63	3.25	1.31e-18	4.55e-17
chr13	110929489	110930069	9.1	5.39	3.72	1.5e-18	5.2e-17
chr10	54117574	54118850	10.18	6.95	3.23	1.57e-18	5.43e-17
chr1	90974870	90975549	9.42	6.21	3.2	1.59e-18	5.49e-17
chr7	75427082	75427791	9.12	5.93	3.2	1.68e-18	5.78e-17
chr3	152308375	152309162	9.33	6.37	2.96	1.69e-18	5.81e-17
chr4	111598005	111598441	9.04	5.59	3.45	1.86e-18	6.39e-17
chr8	26963016	26963864	9.05	6.08	2.97	1.9e-18	6.51e-17
chr4	28424275	28424911	9.09	6.06	3.04	1.93e-18	6.6e-17
chr17	75255888	75256390	9.01	4.98	4.03	2.03e-18	6.92e-17
chr9	100777092	100777716	8.52	5.38	3.14	2.17e-18	7.37e-17
chr8	26239373	26240229	10.14	6.91	3.24	2.25e-18	7.65e-17
chr5	29082998	29083725	9.25	5.85	3.41	2.29e-18	7.76e-17
chr16	55550773	55551330	9.28	6.26	3.02	2.47e-18	8.36e-17
chr3	108997193	108998092	9.79	6.88	2.92	2.51e-18	8.49e-17
chr12	3413887	3414561	8.41	5.13	3.27	2.55e-18	8.6e-17
chr5	58599750	58600338	8.44	4.45	3.99	2.56e-18	8.65e-17
chr10	69777008	69777754	9.11	5.87	3.25	2.59e-18	8.74e-17
chr10	9881783	9882325	8.78	5.44	3.34	2.75e-18	9.25e-17
chr7	66365554	66366309	8.71	5.43	3.28	2.87e-18	9.65e-17
chr6	116286796	116287472	9.39	5.6	3.79	2.91e-18	9.77e-17
chrX	150977086	150977646	8.63	5.07	3.55	2.92e-18	9.81e-17
chr17	42580038	42581110	9.24	5.58	3.66	3.05e-18	1.02e-16
chr10	79538677	79539439	9.46	6.38	3.08	3.12e-18	1.04e-16
chr1	171827705	171828143	7.29	2.7	4.59	3.34e-18	1.12e-16
chr4	12009046	12009768	9.14	5.78	3.36	3.41e-18	1.14e-16
chr12	31996655	31997271	9.1	5.2	3.9	3.58e-18	1.19e-16
chr2	16491222	16491843	9.41	6.27	3.14	3.67e-18	1.22e-16
chr1	191132748	191133460	9.16	6.2	2.96	3.69e-18	1.23e-16
chr6	113292863	113293539	8.55	5.46	3.1	3.71e-18	1.23e-16
chr10	21790103	21790803	9.86	6.23	3.63	3.81e-18	1.27e-16
chr19	17339252	17339989	8.91	5.59	3.31	4.01e-18	1.33e-16
chr5	36618154	36618826	8.75	5.06	3.69	4.14e-18	1.37e-16
chr5	58190452	58191108	8.66	5.2	3.46	4.28e-18	1.41e-16
chr15	34419669	34420688	8.93	6.06	2.87	4.82e-18	1.58e-16
chr13	9014270	9014877	9.12	6.15	2.97	5.84e-18	1.9e-16
chr4	55141204	55141823	8.99	5.28	3.71	5.88e-18	1.91e-16
chr2	122719123	122719722	9.26	4.72	4.54	5.91e-18	1.92e-16
chr13	89828413	89828910	8.67	5.55	3.12	6.2e-18	2.01e-16
chr1	43818931	43819702	8.93	5.9	3.03	6.54e-18	2.12e-16
chr10	121903894	121904605	9.79	6.19	3.6	6.87e-18	2.22e-16
chr4	86674072	86674738	8.95	4.25	4.7	7.44e-18	2.4e-16
chr2	9955762	9956583	9.41	6.69	2.72	7.61e-18	2.45e-16
chr1	40847207	40848175	9.74	5.71	4.03	7.7e-18	2.48e-16
chr3	154754255	154755153	9.55	6.42	3.13	7.86e-18	2.53e-16
chr3	36449192	36449954	10.36	7.49	2.87	8e-18	2.57e-16
chr10	100460507	100460926	7.88	3.69	4.2	8.17e-18	2.63e-16
chr1	106144170	106145039	9.25	6.11	3.14	8.33e-18	2.67e-16
chr2	146018272	146018805	6.51	1.84	4.67	8.37e-18	2.68e-16
chr12	38843630	38844364	9.87	5.83	4.04	8.37e-18	2.69e-16
chr7	105170778	105171314	8.99	5.16	3.83	8.39e-18	2.69e-16
chr14	68044777	68045148	7.34	3.54	3.81	9.24e-18	2.95e-16
chr2	169213201	169213804	9.09	6.04	3.06	9.38e-18	2.99e-16
chr16	15958460	15959139	9.76	6.64	3.12	9.41e-18	3e-16
chr10	63128245	63128911	9.04	6.05	2.99	9.45e-18	3.01e-16
chr5	101163031	101164070	9.54	6.75	2.79	1.03e-17	3.28e-16
chr7	113419135	113419854	9.96	6.17	3.79	1.04e-17	3.28e-16
chr3	135498788	135499506	8.68	5.53	3.15	1.13e-17	3.56e-16
chr9	35038884	35039769	9.19	6.14	3.06	1.22e-17	3.85e-16
chr5	102576620	102577372	9.09	5.68	3.41	1.24e-17	3.91e-16
chr12	41949493	41950359	9.23	6.21	3.02	1.28e-17	4.01e-16
chr9	52226895	52227966	9.85	6.57	3.28	1.28e-17	4.02e-16
chr19	38023553	38024073	8.34	4.99	3.35	1.32e-17	4.14e-16
chr4	58462597	58463401	8.97	5.85	3.12	1.38e-17	4.34e-16
chrX	77489827	77490627	7.89	4.38	3.52	1.41e-17	4.41e-16
chrX	6452329	6452913	7.83	4.23	3.59	1.45e-17	4.54e-16
chr11	35667543	35668476	9.52	6.63	2.89	1.51e-17	4.69e-16
chr16	16560065	16560631	8.61	5.64	2.97	1.52e-17	4.72e-16
chr4	33094533	33095264	8.35	4.81	3.53	1.58e-17	4.91e-16
chr11	56269840	56271027	9.56	6.4	3.15	1.63e-17	5.04e-16
chr12	29934273	29934718	8.52	4.78	3.74	1.66e-17	5.15e-16
chr4	82848577	82849550	9.77	6.71	3.06	1.73e-17	5.35e-16
chrX	101769323	101769948	8.85	5.39	3.46	1.78e-17	5.49e-16
chr1	184260647	184261659	10.19	7.33	2.86	1.8e-17	5.55e-16
chr16	86772540	86773102	8.87	5.69	3.17	1.81e-17	5.57e-16
chr2	19646748	19647614	9.64	6.05	3.58	1.87e-17	5.77e-16
chr10	115845506	115846569	9.33	5.99	3.34	1.95e-17	6e-16
chr14	43977651	43978237	6.14	0.53	5.62	1.97e-17	6.05e-16
chr7	87206923	87207702	8.47	4.65	3.81	1.98e-17	6.09e-16
chr3	146567716	146568471	9.59	6.61	2.98	2.03e-17	6.23e-16
chr19	43560213	43560654	8.28	4.58	3.69	2.19e-17	6.71e-16
chr10	56486398	56487422	9.78	6.79	2.99	2.21e-17	6.75e-16
chr18	6760066	6760395	7.68	4.1	3.58	2.22e-17	6.8e-16
chr11	103311890	103312651	8.95	5.88	3.07	2.44e-17	7.44e-16
chr2	151533636	151534142	9.25	5.26	4	2.59e-17	7.89e-16
chr16	31603124	31603755	9.36	6.17	3.2	2.62e-17	7.97e-16
chr12	37018961	37019719	10.03	5.8	4.23	2.72e-17	8.27e-16
chr5	77580873	77581673	10.07	7.42	2.66	2.72e-17	8.27e-16
chr4	89123835	89124388	8.97	5.4	3.57	2.8e-17	8.5e-16
chr4	81829772	81830447	8.79	5.7	3.09	2.88e-17	8.7e-16
chr4	117469259	117470186	8.28	5.08	3.2	3.02e-17	9.13e-16
chr9	65539590	65540198	8.88	4.77	4.11	3.14e-17	9.46e-16
chr2	52999478	53000083	9.11	6.02	3.09	3.28e-17	9.85e-16
chr1	159392761	159393772	9.35	6.68	2.67	3.83e-17	1.14e-15
chr4	54878434	54878941	8.24	5.26	2.99	3.92e-17	1.17e-15
chr5	53543258	53544042	8.31	5.31	3	4.24e-17	1.26e-15
chr5	23394144	23395192	9.17	6.37	2.8	4.26e-17	1.26e-15
chr16	30442330	30443138	9.48	6.04	3.44	4.38e-17	1.3e-15
chr12	55466827	55467396	9.16	5.62	3.54	4.74e-17	1.4e-15
chr14	46636332	46636819	9.08	6.13	2.95	5e-17	1.47e-15
chr7	51723896	51724412	9	5.48	3.52	5.1e-17	1.5e-15
chr10	91138106	91138744	8.76	5.83	2.93	5.12e-17	1.51e-15
chr4	137954908	137955505	8.85	6.03	2.81	5.46e-17	1.6e-15
chr9	75422174	75422894	9.85	6.03	3.82	5.75e-17	1.68e-15
chr5	18307223	18307849	9.43	6.32	3.11	5.85e-17	1.7e-15
chr5	96931543	96932310	8.65	5.75	2.89	5.87e-17	1.71e-15
chr19	55231979	55232689	9.57	6.57	3	5.89e-17	1.72e-15
chr5	144898378	144899087	9.32	5.86	3.46	5.98e-17	1.74e-15
chr12	78769077	78769819	8.36	4.71	3.65	6.01e-17	1.75e-15
chr15	41611949	41612789	10.38	7.54	2.84	6.14e-17	1.79e-15
chr16	23497260	23497944	8.94	5.86	3.08	6.87e-17	1.99e-15
chr11	29679707	29680473	8.98	5.81	3.17	7.09e-17	2.05e-15
chr8	88091496	88092057	8.68	5.25	3.43	7.26e-17	2.09e-15
chr10	97442147	97442996	8.57	5.5	3.07	7.3e-17	2.11e-15
chr19	9974722	9975383	9.08	6.32	2.76	7.32e-17	2.11e-15
chr6	87868692	87869333	8.39	5.57	2.82	7.35e-17	2.12e-15
chr1	192307024	192307711	8.19	5.06	3.13	7.74e-17	2.23e-15
chr6	142301798	142302539	7.88	4.57	3.31	8.17e-17	2.34e-15
chr16	46094418	46095267	9.18	5.96	3.21	8.27e-17	2.37e-15
chr4	6692120	6693023	9.72	6.85	2.88	8.4e-17	2.4e-15
chr6	94635217	94635858	9	5.95	3.04	8.44e-17	2.41e-15
chr2	172401000	172401709	9.04	6.04	3	9.11e-17	2.6e-15
chr14	60620969	60621710	8.87	6.11	2.77	9.23e-17	2.63e-15
chr3	60884038	60884477	7.94	4.06	3.89	9.38e-17	2.67e-15
chr12	31056228	31056962	9.39	6.36	3.03	9.85e-17	2.8e-15
chr1	183921216	183921934	8.47	5.28	3.19	1.01e-16	2.87e-15
chr17	78444103	78444563	8.12	4.88	3.25	1.02e-16	2.9e-15
chr11	33664783	33665355	9.19	6.14	3.06	1.08e-16	3.06e-15
chr12	108534469	108535134	8.74	5.11	3.63	1.13e-16	3.18e-15
chr19	41030850	41031522	9	5.61	3.38	1.14e-16	3.21e-15
chr1	55575593	55576567	9.23	6.18	3.05	1.16e-16	3.28e-15
chrX	94152280	94153068	8.83	5.19	3.64	1.17e-16	3.3e-15
chr9	57601065	57601763	8.74	5.6	3.14	1.27e-16	3.57e-15
chr1	166043694	166044442	9.91	6.32	3.59	1.34e-16	3.74e-15
chr6	86318627	86319329	8.9	5.93	2.97	1.39e-16	3.88e-15
chr1	82374888	82375366	8.19	4.92	3.27	1.44e-16	4.01e-15
chr4	122838099	122838874	8.57	5.31	3.26	1.45e-16	4.04e-15
chr1	7017490	7018340	7.92	3.98	3.95	1.46e-16	4.08e-15
chr4	148526719	148527518	9.17	6.08	3.1	1.46e-16	4.08e-15
chrX	101368795	101369494	8.17	4.94	3.23	1.5e-16	4.17e-15
chr6	134670779	134671534	9.4	5.98	3.42	1.53e-16	4.27e-15
chr11	33660172	33660902	9.18	6.21	2.96	1.54e-16	4.27e-15
chr14	73838811	73839370	8.87	6.07	2.81	1.56e-16	4.32e-15
chr7	119887879	119888280	7.19	3.69	3.5	1.57e-16	4.36e-15
chr15	63066861	63067657	8.83	6.07	2.76	1.66e-16	4.58e-15
chr18	68015692	68016315	8.84	5.83	3.01	1.68e-16	4.64e-15
chr4	81914716	81915482	8.03	4.56	3.47	1.69e-16	4.68e-15
chr6	67040952	67041505	8.74	5.88	2.86	1.7e-16	4.69e-15
chr6	51118751	51119429	8.82	5.6	3.22	1.74e-16	4.79e-15
chr6	127991457	127992104	9.58	6.72	2.86	1.76e-16	4.86e-15
chr3	145892222	145892974	10.27	7.2	3.08	1.82e-16	5.02e-15
chr4	102907727	102908589	9.8	6.35	3.45	1.87e-16	5.15e-15
chr8	10921303	10922274	9.54	5.57	3.98	1.95e-16	5.38e-15
chr17	6467672	6468548	8	0.53	7.47	1.98e-16	5.43e-15
chr11	72083613	72084210	9.3	5.83	3.48	2.04e-16	5.6e-15
chr12	75354211	75355016	9.54	6.51	3.03	2.09e-16	5.74e-15
chr2	5286212	5287034	9.1	6.22	2.88	2.12e-16	5.8e-15
chr13	5837172	5837837	9.77	6.01	3.77	2.16e-16	5.91e-15
chr15	93340593	93341192	9.09	5.78	3.31	2.21e-16	6.04e-15
chr1	91490175	91490781	8.49	5.37	3.12	2.22e-16	6.08e-15
chr18	60696549	60697667	9.99	7.01	2.98	2.23e-16	6.1e-15
chr15	69545537	69546213	9.11	5.95	3.16	2.24e-16	6.12e-15
chr10	52830669	52831327	9.1	5.2	3.91	2.3e-16	6.29e-15
chr2	60549814	60550299	8.66	5.81	2.85	2.33e-16	6.35e-15
chr2	173770633	173771061	8.92	5.84	3.08	2.33e-16	6.37e-15
chr8	125624082	125624872	8.99	5.72	3.27	2.41e-16	6.55e-15
chr15	55593272	55593744	8.79	5.36	3.42	2.43e-16	6.63e-15
chr10	100024693	100025109	7.73	4.48	3.24	2.5e-16	6.8e-15
chr12	17510090	17510616	9.08	5.83	3.25	2.51e-16	6.82e-15
chr11	44389924	44390717	9.61	6.33	3.28	2.56e-16	6.95e-15
chr16	58377084	58378351	9.28	6.33	2.95	2.68e-16	7.26e-15
chr19	38038018	38038717	8.6	4.92	3.68	2.68e-16	7.26e-15
chr2	167569821	167570705	9.44	6.47	2.97	2.69e-16	7.29e-15
chr7	66477357	66478110	9.39	6.16	3.23	2.75e-16	7.45e-15
chr6	113024683	113025373	8.92	5.76	3.17	2.78e-16	7.5e-15
chr17	73253310	73254091	9.38	6.14	3.24	2.89e-16	7.78e-15
chr11	79738002	79738426	8.24	5.05	3.2	2.94e-16	7.92e-15
chr3	61395320	61395831	8.44	5.34	3.1	2.99e-16	8.04e-15
chr3	85929551	85930185	8.75	5.52	3.23	3.01e-16	8.1e-15
chr4	95500919	95501587	8.53	4.91	3.62	3.05e-16	8.2e-15
chr4	95117052	95117770	8.96	6.06	2.89	3.06e-16	8.2e-15
chr2	160880336	160880866	9.67	6.76	2.9	3.21e-16	8.59e-15
chr6	42295509	42296172	8.68	5.87	2.81	3.23e-16	8.64e-15
chrX	36389965	36390805	8.18	5.09	3.1	3.24e-16	8.69e-15
chr6	141461854	141462515	8.45	4.74	3.71	3.3e-16	8.82e-15
chr15	58517187	58518076	8.48	5.64	2.84	3.41e-16	9.1e-15
chr2	116942022	116943282	9.75	6.7	3.05	3.44e-16	9.18e-15
chr1	179477106	179477948	8.98	6.22	2.76	3.62e-16	9.65e-15
chr1	172960424	172961211	8.97	5.56	3.41	3.63e-16	9.67e-15
chr13	12475194	12475921	9.09	6.51	2.57	3.76e-16	1e-14
chr1	90051055	90051761	9.58	6.45	3.13	3.76e-16	1e-14
chr2	137662956	137664165	8.69	5.93	2.76	3.82e-16	1.01e-14
chr16	89857519	89858030	8.74	5.59	3.14	3.85e-16	1.02e-14
chr10	18323627	18324198	9.23	6.61	2.62	3.98e-16	1.05e-14
chr1	36200201	36200745	8.07	5.14	2.93	4.19e-16	1.11e-14
chr8	4252043	4252491	8.68	5.55	3.14	4.49e-16	1.19e-14
chr11	28833737	28834534	8.79	5.86	2.94	4.57e-16	1.21e-14
chr7	82182680	82183217	8.51	5.12	3.39	4.62e-16	1.22e-14
chrX	136267508	136268143	8.13	4.7	3.43	4.68e-16	1.23e-14
chr15	56844333	56845069	8.65	5.26	3.39	4.82e-16	1.27e-14
chr16	43252947	43253522	8.56	5.25	3.31	4.86e-16	1.28e-14
chr5	131647557	131648507	9.91	6.64	3.27	4.86e-16	1.28e-14
chr1	138912079	138912732	8.39	5.48	2.91	4.88e-16	1.28e-14
chr10	52419354	52419799	9.09	6.07	3.02	4.88e-16	1.28e-14
chr14	72886572	72887461	9.99	6.91	3.08	5.28e-16	1.38e-14
chrX	19904417	19905090	8.53	5.49	3.04	5.4e-16	1.41e-14
chr2	6695202	6696095	8.18	5.36	2.82	5.53e-16	1.45e-14
chr11	104631291	104631797	8.52	4.96	3.55	5.75e-16	1.5e-14
chr18	50062626	50063100	8.39	5.5	2.89	5.9e-16	1.54e-14
chr11	6698222	6698656	8.84	5.92	2.92	5.96e-16	1.55e-14
chr7	27574048	27574565	8.65	5.38	3.27	5.97e-16	1.56e-14
chr13	6085654	6086480	9.08	5.8	3.28	6.15e-16	1.6e-14
chr7	68692435	68693126	9.41	6.57	2.84	6.26e-16	1.63e-14
chr6	143867989	143868663	8.83	6.03	2.8	6.28e-16	1.63e-14
chr16	17024403	17025095	8.55	5.76	2.8	6.29e-16	1.63e-14
chr14	96683451	96684485	8.79	5.66	3.12	6.31e-16	1.64e-14
chr8	79678897	79679408	8.11	4.65	3.46	6.35e-16	1.65e-14
chr9	75425831	75426475	10.23	7.26	2.97	6.79e-16	1.76e-14
chr2	132340238	132340811	8.88	5.89	3	6.8e-16	1.76e-14
chr10	37779779	37780533	8.26	5.23	3.03	7.12e-16	1.84e-14
chr4	95105898	95106613	9.51	6.57	2.95	7.18e-16	1.85e-14
chr5	33427384	33428142	9.49	6.21	3.28	7.78e-16	2e-14
chr2	144637156	144637667	8.71	5.51	3.2	7.82e-16	2.01e-14
chr14	46144483	46145179	8.87	5.71	3.16	8.92e-16	2.28e-14
chr16	3723081	3723700	8.78	5.74	3.04	9.2e-16	2.36e-14
chr4	151339311	151340063	8.76	6.05	2.71	9.41e-16	2.41e-14
chr9	49980415	49981432	10.46	7.75	2.7	9.72e-16	2.48e-14
chr18	42307846	42308475	8.28	5.12	3.16	1.02e-15	2.59e-14
chr10	17347653	17348371	9.54	6.5	3.03	1.05e-15	2.68e-14
chr4	108058120	108058634	8.75	5.66	3.09	1.06e-15	2.7e-14
chr1	192061600	192062302	8.83	6.16	2.67	1.09e-15	2.78e-14
chr1	184061093	184062029	9.22	6.6	2.62	1.11e-15	2.83e-14
chrX	71595358	71595989	7.41	4.12	3.29	1.13e-15	2.87e-14
chr15	34965809	34966574	8.8	5.98	2.82	1.2e-15	3.03e-14
chr18	17086116	17086827	8.48	5.23	3.25	1.22e-15	3.09e-14
chr15	25637673	25638178	8.73	5.92	2.81	1.24e-15	3.14e-14
chr10	30778175	30778793	8.85	5.92	2.93	1.25e-15	3.16e-14
chr14	62638039	62638590	7.71	4.65	3.06	1.28e-15	3.22e-14
chr4	131910394	131910987	8.52	5.86	2.66	1.32e-15	3.32e-14
chr15	40363857	40364723	9.35	6.4	2.96	1.33e-15	3.36e-14
chr19	53971662	53972363	8.76	5.69	3.08	1.34e-15	3.37e-14
chr5	102993922	102994578	9	6.02	2.98	1.34e-15	3.38e-14
chr17	62527363	62527981	8.8	5.29	3.51	1.34e-15	3.39e-14
chr1	180913780	180914338	8.57	4.72	3.86	1.35e-15	3.4e-14
chr1	12734078	12735113	9.06	6.46	2.6	1.36e-15	3.43e-14
chr4	64083677	64084343	8.77	5.61	3.16	1.39e-15	3.5e-14
chr8	11767225	11768143	9.53	6.83	2.71	1.41e-15	3.55e-14
chr9	57473111	57473825	8.06	4.82	3.24	1.47e-15	3.68e-14
chr3	151943452	151944092	8.32	5.1	3.22	1.47e-15	3.7e-14
chr10	71119140	71119986	8.68	5.87	2.82	1.53e-15	3.82e-14
chr2	13409758	13410514	9.49	6.35	3.13	1.53e-15	3.82e-14
chr17	79372354	79373499	9.53	6.07	3.46	1.53e-15	3.83e-14
chr8	68739907	68740535	9.37	6.52	2.85	1.58e-15	3.94e-14
chr3	137292948	137293676	9.39	6.05	3.34	1.58e-15	3.95e-14
chr10	84828752	84829737	9.39	6.46	2.93	1.6e-15	3.98e-14
chr2	60688895	60689608	9.05	6.11	2.94	1.65e-15	4.12e-14
chr17	71164966	71165452	8.03	4.65	3.39	1.66e-15	4.14e-14
chr1	53823635	53824422	9.35	6.24	3.11	1.68e-15	4.18e-14
chr6	64504005	64505231	9.93	6.96	2.97	1.74e-15	4.32e-14
chr12	45137677	45138336	9.31	5.59	3.72	1.75e-15	4.35e-14
chr11	65784328	65785012	9.02	5.45	3.57	1.79e-15	4.45e-14
chr13	67572473	67573168	8.4	5.6	2.81	1.82e-15	4.51e-14
chr12	57163735	57164170	7.65	4.05	3.6	1.92e-15	4.76e-14
chr17	66750462	66751666	10.23	7.19	3.04	1.95e-15	4.83e-14
chr5	3787465	3788297	9.19	6.03	3.15	1.96e-15	4.85e-14
chr3	136577792	136578484	8.45	5.5	2.95	2.03e-15	5.01e-14
chr13	20386494	20387281	9.14	6.44	2.69	2.1e-15	5.19e-14
chr1	79190902	79191562	8.7	5.5	3.2	2.13e-15	5.25e-14
chr1	58761139	58761949	10.09	6.74	3.35	2.19e-15	5.39e-14
chr3	123652833	123653588	9.7	6.2	3.5	2.19e-15	5.39e-14
chr11	29879643	29880053	7.65	4.05	3.6	2.22e-15	5.45e-14
chrX	106964324	106964979	6.92	3.33	3.59	2.23e-15	5.48e-14
chr19	9931076	9931855	8.73	5.94	2.79	2.25e-15	5.54e-14
chr15	34026843	34027921	8.97	5.86	3.11	2.27e-15	5.57e-14
chr15	79813531	79814255	9.12	6.18	2.94	2.28e-15	5.6e-14
chr18	43433206	43433632	8.29	4.92	3.37	2.3e-15	5.66e-14
chr6	82124889	82125658	9.07	5.87	3.2	2.35e-15	5.76e-14
chr1	165432684	165433451	8.36	5.27	3.09	2.36e-15	5.77e-14
chr6	134560121	134560504	6.67	2.14	4.53	2.36e-15	5.77e-14
chr3	146607182	146607854	9	5.66	3.33	2.39e-15	5.85e-14
chr14	73441643	73442413	8.96	5.52	3.44	2.39e-15	5.86e-14
chr3	108767363	108767891	8.87	5.87	3	2.4e-15	5.87e-14
chr6	136965848	136966427	8.9	4.85	4.04	2.54e-15	6.21e-14
chr5	13974488	13975127	9.06	5.37	3.69	2.55e-15	6.23e-14
chrX	133605910	133606542	7.24	3.76	3.48	2.55e-15	6.24e-14
chr9	54802842	54803737	10.13	6.47	3.66	2.57e-15	6.26e-14
chr12	53983745	53984551	9.65	6.74	2.91	2.69e-15	6.56e-14
chr1	139210275	139211101	9.41	6	3.41	2.74e-15	6.68e-14
chr6	24628527	24628972	8	4.73	3.27	2.76e-15	6.71e-14
chr7	126629911	126630293	7.32	3.85	3.47	2.79e-15	6.8e-14
chr1	59609551	59610561	9.64	6.6	3.04	2.8e-15	6.8e-14
chrX	94047945	94048505	7.52	4.1	3.42	2.88e-15	6.99e-14
chr16	11420010	11420880	9.38	6.03	3.35	2.93e-15	7.11e-14
chr9	7544868	7545930	10.14	6.64	3.5	2.99e-15	7.26e-14
chrX	81191880	81192417	8.51	4.96	3.56	2.99e-15	7.26e-14
chr17	5138504	5139272	10.11	6.67	3.43	3.08e-15	7.47e-14
chr4	155582166	155582867	9.55	6.36	3.19	3.13e-15	7.58e-14
chr1	80171604	80172238	8.88	5.31	3.57	3.14e-15	7.59e-14
chr10	25271739	25272437	9.23	5.45	3.78	3.15e-15	7.61e-14
chr2	175141508	175142489	7.31	1.86	5.46	3.38e-15	8.15e-14
chr15	69079161	69079904	9.22	6.63	2.6	3.41e-15	8.21e-14
chr13	39849253	39849854	7.81	4.73	3.08	3.51e-15	8.46e-14
chr6	13052277	13053228	8.96	5.96	2.99	3.64e-15	8.75e-14
chr8	128679768	128680427	9.31	6.5	2.81	3.76e-15	9.04e-14
chr10	128980591	128981553	9.28	6.49	2.79	3.85e-15	9.23e-14
chr1	157393154	157393483	5.85	0.53	5.33	4.02e-15	9.63e-14
chr1	130918294	130919008	8.04	5.14	2.9	4.03e-15	9.65e-14
chr3	132021841	132022698	9.03	5.78	3.25	4.31e-15	1.03e-13
chr2	128758724	128759378	9.64	6.27	3.37	4.31e-15	1.03e-13
chr2	154152084	154152969	9.37	6.03	3.34	4.37e-15	1.04e-13
chr9	43011073	43011750	8.73	6.08	2.65	4.42e-15	1.05e-13
chr11	8051384	8052171	8.94	5.89	3.05	4.48e-15	1.07e-13
chr6	146527263	146528026	9.27	5.92	3.36	4.48e-15	1.07e-13
chr9	6454328	6455116	9.4	5.86	3.54	4.49e-15	1.07e-13
chr4	121088574	121089374	8.58	5.76	2.83	4.61e-15	1.1e-13
chr2	140790302	140790767	7.95	4.89	3.06	4.62e-15	1.1e-13
chr19	21863545	21863984	7.96	5.17	2.79	4.68e-15	1.11e-13
chr10	126379138	126379713	8.41	5.27	3.14	4.75e-15	1.13e-13
chr18	20970986	20971515	8.77	5.79	2.98	5.01e-15	1.19e-13
chr16	57671520	57672136	9.08	5.45	3.62	5.03e-15	1.19e-13
chr13	112990473	112990835	7.94	5.05	2.89	5.08e-15	1.2e-13
chr12	35067605	35068134	8.21	5.19	3.01	5.08e-15	1.2e-13
chr7	43554338	43555160	9.59	6.47	3.12	5.16e-15	1.22e-13
chr8	40495651	40496046	7.35	4.22	3.13	5.18e-15	1.23e-13
chr4	62732100	62732604	9.18	6.54	2.64	5.21e-15	1.23e-13
chr9	94691622	94692563	9.47	6.73	2.74	5.43e-15	1.28e-13
chr11	50252048	50252657	8.56	5.51	3.05	5.72e-15	1.35e-13
chr5	137079771	137080371	9.54	6.17	3.36	5.72e-15	1.35e-13
chr15	52155716	52156243	8.81	5.14	3.67	5.99e-15	1.41e-13
chr1	177708505	177709358	9.62	6.23	3.39	6.19e-15	1.45e-13
chr15	68342498	68342992	8.21	4.61	3.6	6.21e-15	1.46e-13
chr12	91305719	91306185	7.58	4.49	3.1	6.54e-15	1.53e-13
chr7	18715546	18715918	7.51	2.12	5.39	6.68e-15	1.57e-13
chr2	13405006	13405325	7.82	4.85	2.97	6.77e-15	1.58e-13
chr5	64992450	64993008	8.82	5.56	3.26	6.83e-15	1.6e-13
chr5	29492073	29492870	8.61	5.31	3.3	7.24e-15	1.69e-13
chr11	68030655	68031158	8.3	5.28	3.01	7.61e-15	1.77e-13
chr12	29907078	29907835	9.5	7.13	2.38	7.69e-15	1.79e-13
chr8	109773025	109773540	7.82	5.02	2.8	7.95e-15	1.84e-13
chr11	52077787	52078341	8.28	5.43	2.86	7.96e-15	1.84e-13
chr1	177703345	177703854	8.74	4.84	3.9	7.97e-15	1.85e-13
chr9	25485347	25486083	9.46	6.65	2.81	8.14e-15	1.88e-13
chr4	120517048	120517962	9.81	7.1	2.71	8.22e-15	1.9e-13
chr12	102426303	102426745	8.53	5.23	3.3	8.27e-15	1.91e-13
chr9	78045106	78045562	8.11	5.25	2.86	8.37e-15	1.93e-13
chr2	12077191	12078037	8.82	5.93	2.89	8.75e-15	2.02e-13
chr1	173870789	173871218	6.2	0.53	5.67	9.06e-15	2.08e-13
chr3	145887301	145888050	10.31	6.57	3.73	9.24e-15	2.12e-13
chr2	11429521	11430091	10.38	7.83	2.54	9.37e-15	2.15e-13
chr12	71888330	71888817	9.1	5.96	3.14	9.37e-15	2.15e-13
chr9	89869422	89869982	8.01	5.23	2.78	9.49e-15	2.18e-13
chr7	73426017	73426697	7.89	4.56	3.33	9.69e-15	2.22e-13
chr12	79471561	79472506	8.87	5.74	3.13	9.83e-15	2.25e-13
chr5	90875820	90876837	9.02	6.32	2.7	1.01e-14	2.3e-13
chr1	127975563	127976268	8.57	5.91	2.66	1.01e-14	2.31e-13
chr12	51295879	51296541	8.42	5.43	2.99	1.01e-14	2.31e-13
chr17	35393507	35394443	6.03	1.12	4.91	1.05e-14	2.39e-13
chr7	135210133	135210772	8.54	5.26	3.28	1.05e-14	2.39e-13
chr7	118508493	118508957	8.39	5.15	3.23	1.06e-14	2.42e-13
chr11	50565412	50566310	9.32	6.76	2.56	1.07e-14	2.45e-13
chr3	9131776	9132504	9.36	5.9	3.46	1.08e-14	2.46e-13
chr13	9026995	9027645	8.6	5.76	2.85	1.11e-14	2.52e-13
chr14	3048854	3049967	6.98	2.12	4.86	1.13e-14	2.58e-13
chr14	39381265	39381844	8.68	5.59	3.09	1.13e-14	2.58e-13
chr4	89038733	89039378	9.08	5.58	3.5	1.18e-14	2.67e-13
chr15	3905378	3906083	9.12	5.57	3.55	1.19e-14	2.7e-13
chr10	98744020	98744660	8.57	5.99	2.58	1.23e-14	2.78e-13
chr5	151129531	151130311	9.17	6.5	2.67	1.23e-14	2.78e-13
chr5	3151982	3152866	9.13	6.47	2.66	1.24e-14	2.8e-13
chr17	3419334	3419964	8.46	5.55	2.91	1.24e-14	2.81e-13
chr2	52861962	52862488	8.65	5.85	2.8	1.24e-14	2.81e-13
chr11	72847635	72848761	9.39	5.93	3.46	1.25e-14	2.82e-13
chr17	6476409	6477528	8.8	1.1	7.7	1.26e-14	2.84e-13
chr10	34618329	34618918	8.28	5.66	2.62	1.27e-14	2.87e-13
chr11	73318343	73319040	9.08	6.18	2.9	1.29e-14	2.91e-13
chr7	49467702	49468383	8.47	5.81	2.66	1.33e-14	3e-13
chr1	64209005	64209660	8.45	5.02	3.43	1.36e-14	3.07e-13
chr3	55114663	55115390	9.93	6.75	3.18	1.38e-14	3.11e-13
chr13	99410607	99411263	8.65	5.86	2.79	1.4e-14	3.14e-13
chr2	68782205	68783114	9.03	6.48	2.55	1.42e-14	3.18e-13
chr2	13558489	13559123	8.67	5.85	2.82	1.46e-14	3.27e-13
chr12	8388706	8389148	8.27	5.39	2.88	1.51e-14	3.37e-13
chr11	88495637	88496413	8.52	5.39	3.13	1.52e-14	3.39e-13
chr18	44668211	44668886	7.94	5.12	2.82	1.53e-14	3.41e-13
chr11	7235093	7235566	8.66	5.34	3.32	1.55e-14	3.47e-13
chr9	88091566	88093014	9.59	7.03	2.56	1.62e-14	3.61e-13
chr8	23516163	23516945	9.26	5.95	3.3	1.62e-14	3.61e-13
chr1	90834752	90835226	8.57	4.98	3.59	1.64e-14	3.65e-13
chr9	52105282	52106076	8.68	5.92	2.76	1.66e-14	3.68e-13
chr8	31372478	31373753	9.19	6.34	2.85	1.66e-14	3.68e-13
chr6	55003307	55004174	8.95	6.2	2.75	1.7e-14	3.78e-13
chr2	130832544	130833042	7.78	4.85	2.93	1.71e-14	3.81e-13
chr16	92930028	92930690	8.81	5.85	2.96	1.72e-14	3.82e-13
chr3	56962529	56963100	8.6	5.33	3.27	1.74e-14	3.87e-13
chr7	116462114	116462566	8.75	5.64	3.11	1.78e-14	3.94e-13
chr5	64112200	64112984	9.74	6.11	3.63	1.8e-14	3.99e-13
chr6	31244175	31244812	8.52	5.37	3.15	1.81e-14	4e-13
chr12	69814102	69814881	9.34	6.25	3.09	1.82e-14	4.02e-13
chr8	24516737	24517045	7.07	3.61	3.46	1.82e-14	4.03e-13
chr18	70587638	70588469	8.66	5.38	3.28	1.82e-14	4.03e-13
chr13	13552000	13552445	7.73	4.56	3.16	1.84e-14	4.07e-13
chr19	40253405	40254239	8.97	5.99	2.99	1.87e-14	4.12e-13
chr19	14570860	14571626	8.51	5.32	3.19	1.87e-14	4.13e-13
chr5	148965657	148966341	8.74	5.6	3.14	1.88e-14	4.15e-13
chr12	108449767	108450535	8.58	6.03	2.55	1.9e-14	4.2e-13
chr6	39334068	39334759	9.68	6.93	2.75	1.91e-14	4.21e-13
chr4	100664657	100665485	9.4	5.52	3.88	1.92e-14	4.23e-13
chr3	68764762	68765673	9.54	7.06	2.48	1.93e-14	4.25e-13
chrX	53162617	53163041	7.08	3.92	3.16	1.93e-14	4.25e-13
chr10	102622457	102623378	9.83	6.58	3.25	1.97e-14	4.34e-13
chr18	5740296	5740891	8.89	6.29	2.6	2.01e-14	4.42e-13
chr18	65053750	65054320	8.95	6.12	2.83	2.11e-14	4.64e-13
chr4	132653685	132654152	7.54	3.99	3.55	2.12e-14	4.64e-13
chr8	126550888	126551439	8.64	5.02	3.62	2.12e-14	4.64e-13
chr10	12787732	12788439	9.01	5.85	3.16	2.12e-14	4.65e-13
chr7	89884380	89885021	9.5	5.08	4.42	2.13e-14	4.67e-13
chr14	57759629	57761025	9.92	6.75	3.18	2.16e-14	4.74e-13
chr18	78097282	78097944	8.84	5.38	3.45	2.19e-14	4.79e-13
chr11	7863568	7864271	8.57	5.95	2.62	2.19e-14	4.79e-13
chr9	44905559	44906113	8.29	5.59	2.7	2.23e-14	4.87e-13
chr5	72863125	72863985	9.47	6.46	3.01	2.24e-14	4.9e-13
chr14	18939860	18940622	9.45	6.04	3.42	2.28e-14	4.97e-13
chr8	40470222	40470861	8.1	4.95	3.16	2.3e-14	5.02e-13
chr19	60459095	60460299	9.68	6.73	2.95	2.31e-14	5.04e-13
chr19	21106137	21106969	10.23	7.74	2.49	2.35e-14	5.12e-13
chr7	74106938	74107584	9.09	6.02	3.06	2.35e-14	5.12e-13
chr4	13799212	13800109	9.6	6.49	3.11	2.35e-14	5.12e-13
chr10	27984998	27985581	8.87	5.45	3.43	2.4e-14	5.22e-13
chr8	61621320	61621824	8.37	5.16	3.2	2.42e-14	5.26e-13
chr12	80374643	80375118	8.71	5.08	3.63	2.42e-14	5.26e-13
chr1	36325709	36326459	9.37	6.37	2.99	2.43e-14	5.28e-13
chr11	29884103	29884787	8.88	4.81	4.07	2.45e-14	5.33e-13
chr17	8859538	8859919	7.85	4.57	3.28	2.5e-14	5.44e-13
chr2	22770886	22771268	7.42	3.63	3.79	2.6e-14	5.64e-13
chr1	93857193	93857784	6.37	0.53	5.84	2.64e-14	5.71e-13
chr13	93162275	93162909	7.91	4.89	3.02	2.71e-14	5.87e-13
chr11	7502665	7503147	7.67	4.74	2.93	2.77e-14	5.99e-13
chr13	6624082	6624538	8.3	5.7	2.6	2.81e-14	6.08e-13
chr16	6963452	6963944	8.73	5.99	2.74	2.83e-14	6.13e-13
chr12	24734818	24735594	8.87	6.31	2.56	2.87e-14	6.2e-13
chr18	39319117	39320052	8.85	6.3	2.56	3e-14	6.48e-13
chr3	31339001	31339688	9	6.36	2.64	3.02e-14	6.51e-13
chr1	31153769	31154312	8.55	6.06	2.48	3.06e-14	6.59e-13
chr5	8736937	8737727	9.02	6.41	2.61	3.15e-14	6.79e-13
chr1	178322002	178322305	7.59	4.53	3.06	3.17e-14	6.82e-13
chr1	176832515	176833106	9.3	5.1	4.2	3.18e-14	6.85e-13
chr1	150323234	150323686	7.14	3.68	3.46	3.22e-14	6.92e-13
chr18	69704597	69705195	8.91	5.97	2.94	3.26e-14	7.01e-13
chr18	14331204	14331981	9.4	6.59	2.81	3.3e-14	7.08e-13
chr8	24990130	24990767	8.78	5.38	3.4	3.36e-14	7.21e-13
chr14	64038892	64039350	8.64	5.47	3.17	3.36e-14	7.22e-13
chr2	134544748	134545598	9.04	5.52	3.53	3.44e-14	7.38e-13
chr1	170136322	170137002	8.6	5.63	2.97	3.46e-14	7.41e-13
chr19	3419228	3419874	8.81	6.35	2.45	3.47e-14	7.43e-13
chr13	51970022	51970543	8.67	5.91	2.76	3.49e-14	7.47e-13
chrX	160929367	160929769	6.75	3.11	3.63	3.55e-14	7.6e-13
chr10	42759758	42760153	7.87	4.18	3.69	3.56e-14	7.61e-13
chr9	102993674	102994229	8.94	5.49	3.45	3.57e-14	7.64e-13
chr2	131548279	131548872	8.52	5.54	2.98	3.59e-14	7.67e-13
chr13	107485448	107486103	8.95	6.36	2.59	3.62e-14	7.74e-13
chr16	16224197	16225041	9.6	6.46	3.14	3.64e-14	7.78e-13
chr14	18773704	18774239	8.99	6.11	2.89	3.72e-14	7.93e-13
chr17	78444599	78445450	10.04	6.87	3.17	3.73e-14	7.95e-13
chr8	82201552	82202410	9.15	5.79	3.36	3.78e-14	8.05e-13
chr2	13500205	13500738	8.55	5.63	2.92	3.81e-14	8.12e-13
chr14	43967093	43968061	6.42	1.86	4.56	3.83e-14	8.15e-13
chrX	101705035	101705509	7.39	3.91	3.47	3.94e-14	8.36e-13
chr5	86630402	86631089	8.16	5.26	2.89	3.94e-14	8.36e-13
chr5	111880177	111880723	8.59	5.95	2.64	3.95e-14	8.38e-13
chr9	50899942	50901025	9.15	6.44	2.71	3.98e-14	8.45e-13
chr5	72249961	72250678	9.45	6.04	3.41	4.12e-14	8.72e-13
chr10	54026533	54027200	9.49	6.35	3.15	4.26e-14	9.01e-13
chr7	68266662	68267302	8.72	5.31	3.41	4.27e-14	9.03e-13
chr12	29749106	29749858	8.94	5.79	3.15	4.28e-14	9.05e-13
chr6	16891520	16892385	8.31	5.52	2.79	4.32e-14	9.12e-13
chr2	138027363	138027978	8.28	5.26	3.02	4.32e-14	9.13e-13
chr5	34535870	34536265	8.08	5.22	2.86	4.4e-14	9.28e-13
chr16	26316207	26316775	8.9	5.57	3.33	4.46e-14	9.4e-13
chr13	112772909	112773354	7.38	4.07	3.3	4.51e-14	9.5e-13
chr2	164438915	164439338	8.2	5.5	2.7	4.56e-14	9.61e-13
chr13	95424752	95425291	8.04	5.11	2.93	4.57e-14	9.63e-13
chr1	87255145	87255656	8.69	5.12	3.57	4.58e-14	9.64e-13
chr19	22134344	22135079	8.44	5.41	3.03	4.69e-14	9.86e-13
chr1	172423231	172424051	9.55	5.22	4.33	4.7e-14	9.87e-13
chr1	17007657	17008198	8.31	5.7	2.61	4.79e-14	1e-12
chr5	9068781	9069542	8.96	6.33	2.63	4.79e-14	1e-12
chr15	37443293	37444015	9.19	6.04	3.15	4.82e-14	1.01e-12
chr11	71008291	71008719	7.96	5.17	2.79	4.84e-14	1.02e-12
chr1	58692327	58692895	8.17	4.77	3.4	4.86e-14	1.02e-12
chr19	36290614	36291367	8.26	5.62	2.64	4.87e-14	1.02e-12
chr2	34609473	34610143	8.52	5.67	2.85	4.96e-14	1.04e-12
chr6	113166636	113167433	8.9	6.05	2.84	5.03e-14	1.05e-12
chr7	65085768	65086554	8.52	6.05	2.47	5.04e-14	1.05e-12
chr11	16791122	16791749	9.08	6.28	2.8	5.26e-14	1.1e-12
chr11	67828089	67828985	8.43	5.71	2.71	5.3e-14	1.11e-12
chr13	107899355	107900096	8.87	5.87	3	5.36e-14	1.12e-12
chr17	47361376	47361763	7.65	4.27	3.38	5.47e-14	1.14e-12
chr1	165192095	165192594	8.31	4.99	3.32	5.64e-14	1.18e-12
chr2	16982489	16983448	8.82	6.26	2.56	5.79e-14	1.2e-12
chr15	62328127	62329320	10.21	6.82	3.38	5.79e-14	1.21e-12
chr13	90513809	90514345	8.87	6.03	2.84	6.08e-14	1.26e-12
chr11	114352111	114352779	8.86	6.04	2.82	6.19e-14	1.29e-12
chr1	88094057	88095455	8.44	5.82	2.61	6.41e-14	1.33e-12
chr2	9481477	9482450	8.8	6.06	2.74	6.53e-14	1.35e-12
chr3	115646939	115647782	9.86	6.98	2.88	6.57e-14	1.36e-12
chr9	25243891	25244292	8.77	5.06	3.71	6.88e-14	1.42e-12
chr17	84110001	84110754	8.69	6.2	2.5	6.91e-14	1.43e-12
chr1	153300321	153300882	8.97	5.64	3.32	6.91e-14	1.43e-12
chr14	64368227	64368715	8.39	5.27	3.12	6.94e-14	1.44e-12
chr8	26722653	26723453	8.92	5.7	3.22	6.99e-14	1.44e-12
chr4	54929484	54930069	8.07	4.98	3.09	7e-14	1.45e-12
chr11	12396045	12396668	8.17	5.6	2.58	7.08e-14	1.46e-12
chr1	177623211	177623878	9.08	6.71	2.37	7.37e-14	1.52e-12
chr5	29142292	29143164	8.97	5.97	2.99	7.42e-14	1.53e-12
chr19	27351501	27352358	9.67	6.96	2.7	7.46e-14	1.54e-12
chr9	36842219	36842883	8.28	5.58	2.71	7.58e-14	1.56e-12
chr15	12111047	12111915	9.09	6.23	2.86	7.61e-14	1.57e-12
chr2	7090342	7091006	8.66	5.7	2.97	7.76e-14	1.59e-12
chr3	61340045	61340677	8.36	5.6	2.76	7.96e-14	1.63e-12
chr7	66591840	66592379	8.24	5.69	2.54	8e-14	1.64e-12
chr5	147934904	147935746	8.45	5.9	2.55	8.09e-14	1.66e-12
chr6	67035428	67035800	8.19	4.91	3.27	8.17e-14	1.67e-12
chr8	81866956	81867424	8.46	5.05	3.41	8.22e-14	1.68e-12
chr5	147832860	147833253	5.76	0.53	5.23	8.34e-14	1.71e-12
chrX	68494565	68495571	9.41	7.11	2.29	8.43e-14	1.72e-12
chr18	60605975	60606616	10.09	7.7	2.39	8.57e-14	1.75e-12
chr4	57861858	57862269	8.3	5.48	2.82	8.8e-14	1.8e-12
chr18	12468716	12469143	7.85	4.52	3.32	9.13e-14	1.86e-12
chr14	24763540	24764476	9.58	6.65	2.93	9.17e-14	1.87e-12
chr4	44094430	44094933	8.32	5.46	2.86	9.34e-14	1.9e-12
chr10	16087939	16088597	7.62	4.12	3.51	9.45e-14	1.93e-12
chr3	61343926	61344518	8.67	5.56	3.1	9.98e-14	2.03e-12
chr13	58999179	59000206	9.32	6.96	2.36	1e-13	2.04e-12
chr5	74492454	74493597	9.53	6.24	3.29	1e-13	2.04e-12
chr16	18095905	18096878	8.73	6.07	2.66	1.01e-13	2.06e-12
chr2	122651844	122652860	10.09	7.77	2.32	1.01e-13	2.06e-12
chr7	89664144	89664682	8.01	5.43	2.57	1.04e-13	2.12e-12
chr14	20154784	20155505	8.57	5.72	2.85	1.04e-13	2.12e-12
chr6	45088108	45088726	8.04	5.17	2.87	1.07e-13	2.16e-12
chrX	144557803	144558439	7.25	3.61	3.63	1.09e-13	2.2e-12
chr6	144670356	144671172	9.18	5.92	3.26	1.09e-13	2.2e-12
chr4	145322088	145322545	8.16	5.46	2.71	1.11e-13	2.25e-12
chr2	57807721	57808359	8.69	5.39	3.3	1.11e-13	2.25e-12
chr8	49389526	49390049	8.42	5.28	3.13	1.12e-13	2.25e-12
chr3	14948053	14948661	8.17	5.5	2.67	1.14e-13	2.29e-12
chr2	48978569	48979129	6.79	3.32	3.48	1.15e-13	2.32e-12
chr15	13384767	13385240	8.33	5.58	2.74	1.15e-13	2.32e-12
chr6	115768167	115768839	9.22	6.83	2.39	1.18e-13	2.37e-12
chr1	189566437	189566896	7.66	4.58	3.08	1.19e-13	2.4e-12
chr19	21780620	21781059	8.58	5.97	2.61	1.21e-13	2.44e-12
chr4	152294263	152294990	9.56	6.99	2.57	1.23e-13	2.47e-12
chr11	57914186	57914668	7.85	4.92	2.92	1.24e-13	2.48e-12
chr6	39447532	39448352	9.52	6.96	2.56	1.24e-13	2.5e-12
chr9	15370970	15371680	8.01	5.23	2.78	1.25e-13	2.51e-12
chr8	71526218	71526624	8	4.94	3.06	1.26e-13	2.52e-12
chr1	91823286	91823997	9.38	6.73	2.65	1.3e-13	2.6e-12
chr6	118621780	118622272	8.08	4.85	3.23	1.31e-13	2.63e-12
chr5	34565531	34566397	9.14	6.76	2.38	1.31e-13	2.63e-12
chr15	6564847	6565543	9.2	5.85	3.35	1.35e-13	2.7e-12
chrX	53729015	53729600	8.04	4.32	3.72	1.37e-13	2.73e-12
chr1	120136082	120136890	8.85	6.14	2.71	1.39e-13	2.76e-12
chr2	165405038	165405747	8.77	6.27	2.5	1.39e-13	2.77e-12
chr12	41182854	41183310	7.31	3.98	3.33	1.42e-13	2.83e-12
chr19	41160223	41161197	9.97	6.63	3.34	1.42e-13	2.83e-12
chr2	146533158	146533946	9.67	7.13	2.53	1.43e-13	2.85e-12
chr14	43932977	43933517	6.26	1.83	4.43	1.44e-13	2.86e-12
chr13	92067808	92068389	7.85	5.17	2.68	1.44e-13	2.87e-12
chr2	109357997	109358981	8.78	6.05	2.73	1.45e-13	2.88e-12
chr4	19918656	19919278	8.65	5.66	2.99	1.45e-13	2.89e-12
chr18	15833179	15833877	8.24	5.2	3.04	1.46e-13	2.9e-12
chr15	51952394	51952935	8.24	5.03	3.21	1.48e-13	2.94e-12
chr15	89940380	89941301	9.04	6.32	2.72	1.49e-13	2.96e-12
chr11	103050988	103051786	9.18	6.73	2.45	1.5e-13	2.97e-12
chrX	139933453	139933917	7.43	3.85	3.57	1.51e-13	3e-12
chr12	40788394	40789249	8.51	5.78	2.73	1.52e-13	3.01e-12
chr7	19910751	19911757	9.76	6.89	2.88	1.52e-13	3.01e-12
chr2	83700409	83701380	9.38	6.68	2.7	1.53e-13	3.03e-12
chr15	53617131	53618720	9.87	6.98	2.89	1.54e-13	3.05e-12
chr19	53405636	53406175	8.59	4.78	3.81	1.56e-13	3.09e-12
chr5	64269547	64270252	7.9	5.06	2.85	1.57e-13	3.1e-12
chr12	32099620	32100153	8.39	5.17	3.21	1.57e-13	3.1e-12
chr3	9573496	9574052	8.75	5.57	3.17	1.58e-13	3.13e-12
chr4	57839167	57839901	9.51	6.38	3.13	1.61e-13	3.18e-12
chr16	52469955	52470791	8.17	5.57	2.59	1.62e-13	3.19e-12
chr14	117514617	117515350	8.77	6.17	2.6	1.62e-13	3.2e-12
chr13	23659975	23660509	7.77	4.17	3.6	1.65e-13	3.26e-12
chr1	178492283	178493081	8.17	5.6	2.58	1.69e-13	3.34e-12
chr1	169368658	169369227	8.39	4.73	3.66	1.7e-13	3.34e-12
chr4	139232421	139233152	9.06	6.72	2.35	1.74e-13	3.42e-12
chr1	72364606	72365469	9.23	6.6	2.63	1.74e-13	3.43e-12
chr13	76690019	76690827	8.51	5.64	2.87	1.78e-13	3.49e-12
chr10	52934482	52935140	8.37	5.05	3.32	1.79e-13	3.51e-12
chr17	74088999	74089721	8.84	5.66	3.18	1.79e-13	3.52e-12
chr1	53940140	53940891	9.58	7.04	2.54	1.8e-13	3.54e-12
chr4	52660520	52661261	8.68	6.04	2.64	1.83e-13	3.59e-12
chr10	22413688	22414284	5.94	1.55	4.4	1.86e-13	3.64e-12
chr8	87071044	87071680	8.99	6.38	2.61	1.87e-13	3.67e-12
chr11	35832053	35832758	8.53	5.81	2.72	1.87e-13	3.68e-12
chr2	148184705	148185465	9.73	6.53	3.2	1.9e-13	3.73e-12
chr16	44494401	44495287	8.87	6.28	2.59	1.94e-13	3.8e-12
chr16	76470888	76471939	9.08	6.38	2.7	2e-13	3.91e-12
chr11	50439590	50440321	8.53	5.72	2.8	2.01e-13	3.93e-12
chr3	30437517	30438414	9.19	6.23	2.96	2.01e-13	3.93e-12
chr18	15335232	15336057	9.32	6.52	2.8	2.02e-13	3.95e-12
chr16	94601442	94602042	8.85	6.29	2.56	2.04e-13	3.99e-12
chrX	13463003	13463519	8.36	4.69	3.67	2.05e-13	4.01e-12
chr1	158947971	158949123	9.18	6.79	2.38	2.07e-13	4.05e-12
chr4	8822490	8822955	8.56	5.61	2.95	2.11e-13	4.12e-12
chr3	123754788	123755372	7.89	4.62	3.28	2.12e-13	4.13e-12
chr1	17488871	17489928	10.17	7.11	3.07	2.22e-13	4.31e-12
chr7	105458508	105458965	7.23	3.77	3.46	2.22e-13	4.32e-12
chr5	21145155	21145850	8.65	5.73	2.91	2.25e-13	4.38e-12
chr19	38973524	38974235	8.49	5.74	2.76	2.25e-13	4.38e-12
chr9	88423777	88424373	7.58	4.81	2.78	2.28e-13	4.43e-12
chr9	6298372	6299057	8.84	6.1	2.74	2.29e-13	4.46e-12
chr6	112245523	112246227	8.96	6.53	2.43	2.36e-13	4.58e-12
chr11	85367680	85368536	9.35	6.88	2.47	2.41e-13	4.67e-12
chrX	36082859	36083391	7.15	4.17	2.98	2.45e-13	4.76e-12
chr8	36660191	36661009	9.29	7.01	2.28	2.48e-13	4.81e-12
chr8	45528752	45529550	9.04	5.5	3.55	2.56e-13	4.96e-12
chr1	120034700	120035253	9.41	5.72	3.69	2.57e-13	4.97e-12
chr2	69716498	69716894	7.59	4.58	3.01	2.61e-13	5.04e-12
chr10	98561905	98562430	8.26	5.08	3.19	2.64e-13	5.1e-12
chr12	57159872	57160333	8.69	4.58	4.1	2.65e-13	5.12e-12
chr4	139213829	139214843	9.33	6.87	2.46	2.69e-13	5.19e-12
chr16	37728595	37729119	8.03	5.15	2.88	2.69e-13	5.19e-12
chr10	76930866	76931801	8.5	5.61	2.9	2.73e-13	5.26e-12
chr2	171719146	171719822	8.25	5.61	2.64	2.74e-13	5.27e-12
chr10	5194306	5195286	9.65	7.06	2.59	2.79e-13	5.36e-12
chr12	31059341	31059997	8.45	5.32	3.12	2.79e-13	5.38e-12
chr1	41390044	41390775	8.93	6.23	2.7	2.81e-13	5.41e-12
chr12	40584520	40585302	9.18	6.11	3.07	2.83e-13	5.44e-12
chr2	146532301	146532794	8.16	4.42	3.75	2.86e-13	5.49e-12
chr14	8789261	8789841	8.35	4.77	3.58	2.9e-13	5.57e-12
chrX	6501793	6502290	7.4	4.28	3.12	2.94e-13	5.63e-12
chr1	167241925	167242600	8.3	5.79	2.51	2.97e-13	5.7e-12
chr1	157011180	157011787	8.67	5.48	3.19	2.98e-13	5.71e-12
chr14	69740631	69741466	8.42	5.68	2.74	2.99e-13	5.73e-12
chr15	83166556	83167101	9.4	6.47	2.93	3.05e-13	5.85e-12
chr10	17602272	17602957	8.89	5.36	3.53	3.07e-13	5.87e-12
chr10	17772299	17772942	8.34	5.36	2.98	3.07e-13	5.88e-12
chr5	151315729	151316859	9.84	6.98	2.87	3.12e-13	5.97e-12
chr9	72702000	72702531	8.42	5.02	3.4	3.14e-13	6.01e-12
chr19	8474868	8475461	8.22	5.41	2.81	3.15e-13	6.01e-12
chr8	70911012	70912092	9.79	7.21	2.58	3.21e-13	6.13e-12
chr16	76409274	76409821	8.41	5.64	2.77	3.22e-13	6.14e-12
chr3	57435332	57435942	8.91	5.99	2.92	3.27e-13	6.22e-12
chr2	69380212	69380771	7.94	5.41	2.53	3.37e-13	6.4e-12
chr14	74733395	74733821	8.22	5	3.22	3.39e-13	6.44e-12
chr3	30467708	30468761	10.02	6.89	3.13	3.4e-13	6.46e-12
chr11	20117465	20117735	6.59	2.82	3.77	3.41e-13	6.48e-12
chr12	78639942	78640535	7.67	4.89	2.78	3.42e-13	6.5e-12
chr2	10667359	10667964	8.12	5.38	2.73	3.46e-13	6.57e-12
chr3	113647511	113648369	8.39	5.78	2.61	3.48e-13	6.6e-12
chr11	106195312	106195759	7.94	5.28	2.66	3.51e-13	6.66e-12
chr5	144909520	144910166	8.76	5.99	2.76	3.54e-13	6.71e-12
chr3	158155616	158156332	8.01	5.36	2.65	3.54e-13	6.72e-12
chr10	120188405	120189135	8.83	5.9	2.92	3.54e-13	6.72e-12
chr13	52235815	52236779	9.74	7.4	2.34	3.57e-13	6.76e-12
chr8	81756630	81757263	8.51	5.67	2.83	3.59e-13	6.8e-12
chr5	29854287	29855035	8.57	5.68	2.89	3.59e-13	6.8e-12
chr12	53146415	53147177	8.08	5.49	2.58	3.59e-13	6.8e-12
chr15	90109403	90110162	9.92	7.56	2.36	3.64e-13	6.9e-12
chrX	144502952	144503631	7.82	5.11	2.72	3.68e-13	6.96e-12
chr13	95427442	95428034	8.58	5.46	3.12	3.71e-13	7.01e-12
chr12	117480914	117481469	8.25	5.38	2.87	3.73e-13	7.06e-12
chr14	41017222	41017932	8.89	6.49	2.4	3.74e-13	7.07e-12
chrX	168765519	168766209	7.23	4.44	2.79	3.81e-13	7.19e-12
chr5	81364021	81364720	8.45	5.64	2.81	3.82e-13	7.22e-12
chr15	7877591	7878504	9.95	7.3	2.65	3.82e-13	7.22e-12
chr3	66239235	66239757	8.61	5.19	3.42	3.84e-13	7.24e-12
chr11	28906220	28906729	8.42	5.96	2.46	3.91e-13	7.37e-12
chr4	144998002	144998908	9.25	7	2.25	3.96e-13	7.46e-12
chr11	110781685	110782564	9.71	6.82	2.89	3.96e-13	7.47e-12
chr17	10611496	10612220	8.2	5.6	2.6	3.98e-13	7.5e-12
chr13	113202115	113202620	7.99	4.18	3.82	4.01e-13	7.55e-12
chr11	113060812	113061551	9.48	7.09	2.39	4.09e-13	7.69e-12
chr1	97759812	97760328	7.57	4.38	3.19	4.2e-13	7.89e-12
chr7	128310282	128310793	8.54	5.67	2.87	4.21e-13	7.9e-12
chr16	45837612	45838530	10.12	7.44	2.68	4.21e-13	7.9e-12
chr17	64616190	64616789	8.82	6.17	2.66	4.23e-13	7.94e-12
chrX	157488865	157489221	6.97	3.4	3.56	4.25e-13	7.98e-12
chr12	15619217	15620101	8.13	5.06	3.07	4.28e-13	8.03e-12
chr13	103977856	103978953	9.27	6.35	2.91	4.35e-13	8.15e-12
chr12	38904335	38905095	8.66	6.1	2.56	4.4e-13	8.25e-12
chr13	85398752	85399434	8.26	5.5	2.76	4.44e-13	8.31e-12
chrX	129413359	129414218	8.11	5.42	2.69	4.44e-13	8.31e-12
chr10	91158384	91159015	8.76	5.55	3.21	4.49e-13	8.39e-12
chr12	77949432	77950365	8.71	6.31	2.4	4.56e-13	8.51e-12
chr2	134522144	134522710	7.86	4.97	2.9	4.57e-13	8.53e-12
chr6	33042687	33043475	8.26	5.77	2.49	4.59e-13	8.57e-12
chr15	99033512	99033926	8.1	4.88	3.22	4.59e-13	8.57e-12
chr14	25532964	25533556	9	6.63	2.37	4.67e-13	8.71e-12
chr3	81017287	81018250	9.29	6.96	2.33	4.7e-13	8.76e-12
chr3	65922421	65922952	8.83	5.88	2.95	4.71e-13	8.79e-12
chr2	148186542	148186959	7.87	4.48	3.38	4.83e-13	8.99e-12
chr16	17732864	17733523	8.24	4.76	3.48	4.87e-13	9.07e-12
chr13	107003044	107003717	8.39	5.78	2.6	4.94e-13	9.19e-12
chr15	98571033	98571430	8.04	4.85	3.19	4.95e-13	9.21e-12
chr2	132585890	132586565	8.32	5.32	3	5.1e-13	9.48e-12
chr6	35388646	35389408	8.75	6.18	2.57	5.2e-13	9.66e-12
chr1	162076449	162077073	8.4	5.55	2.85	5.32e-13	9.87e-12
chr19	21820091	21820919	9.01	6.01	3	5.37e-13	9.97e-12
chrX	155584558	155585189	8.36	5.92	2.44	5.43e-13	1.01e-11
chr15	103358273	103359454	9.85	7.6	2.25	5.47e-13	1.01e-11
chr5	143056317	143056934	8.19	5.08	3.11	5.5e-13	1.02e-11
chr9	120049361	120049950	7.72	5.06	2.66	5.59e-13	1.03e-11
chr17	81782027	81782753	8.36	5.85	2.51	5.6e-13	1.04e-11
chr1	177719048	177719666	8.49	5.93	2.56	5.62e-13	1.04e-11
chr4	107364036	107364568	8	5.3	2.7	5.65e-13	1.04e-11
chr6	119333049	119333672	8.64	6.07	2.56	5.65e-13	1.04e-11
chr17	12737927	12738277	7.81	5.14	2.67	5.67e-13	1.05e-11
chr1	143941431	143941892	8.2	5.2	3.01	5.76e-13	1.06e-11
chr12	17117943	17118386	6.17	1.12	5.04	5.77e-13	1.06e-11
chr19	34420336	34421465	8.35	5.92	2.43	5.79e-13	1.07e-11
chr3	103759425	103759964	8.29	4.92	3.37	5.95e-13	1.1e-11
chr12	73637110	73637853	8.45	5.87	2.58	6.03e-13	1.11e-11
chr6	12601970	12602591	7.98	5.31	2.67	6.03e-13	1.11e-11
chr8	116587581	116588521	10.16	7.77	2.39	6.04e-13	1.11e-11
chr15	99400603	99401035	7.89	4.69	3.2	6.06e-13	1.12e-11
chr4	14856972	14857827	9.03	6.12	2.91	6.07e-13	1.12e-11
chr1	164888296	164889100	7.97	4.9	3.07	6.25e-13	1.15e-11
chr16	49938720	49939358	8.58	5.82	2.76	6.31e-13	1.16e-11
chr16	88710602	88711243	8.43	5.9	2.53	6.34e-13	1.17e-11
chr12	77969844	77970423	8.59	5.76	2.83	6.4e-13	1.18e-11
chr3	145104965	145105913	8.82	6.49	2.34	6.4e-13	1.18e-11
chr17	4785256	4785841	8.04	5.46	2.58	6.44e-13	1.18e-11
chr2	166729617	166730621	8.83	6.48	2.34	6.46e-13	1.19e-11
chr10	77005062	77005640	8.34	5.49	2.84	6.61e-13	1.21e-11
chr7	112823595	112824176	9.17	6.21	2.96	6.67e-13	1.22e-11
chr13	100461201	100462099	8.44	5.78	2.66	6.7e-13	1.23e-11
chr1	161451670	161452552	8.14	5.42	2.72	6.71e-13	1.23e-11
chr2	50690098	50690970	8.7	5.7	2.99	6.82e-13	1.25e-11
chr4	145272491	145273348	9.33	6.38	2.95	6.93e-13	1.27e-11
chr18	9814431	9815025	8.68	5.91	2.78	6.94e-13	1.27e-11
chr9	37806374	37807559	8.72	5.87	2.85	6.94e-13	1.27e-11
chr12	90857579	90858432	9.07	5.99	3.09	6.99e-13	1.28e-11
chr9	74911709	74912394	8.51	5.84	2.67	7.03e-13	1.28e-11
chr2	11529978	11530732	9.03	6.5	2.52	7.18e-13	1.31e-11
chr5	19970087	19970683	7.61	4.57	3.04	7.2e-13	1.31e-11
chr6	99343611	99344682	8.62	6.16	2.47	7.21e-13	1.31e-11
chr16	42479972	42480619	8.62	5.61	3	7.22e-13	1.32e-11
chr18	15721638	15722713	9.81	7.51	2.29	7.24e-13	1.32e-11
chr14	46965950	46966593	8.71	5.82	2.89	7.35e-13	1.34e-11
chr1	129462715	129463337	8.72	6	2.72	7.35e-13	1.34e-11
chrX	42423056	42423429	6.13	2.11	4.02	7.43e-13	1.35e-11
chr6	52825211	52826000	9.03	6.62	2.41	7.5e-13	1.36e-11
chr13	92668110	92668566	8.05	5	3.05	7.58e-13	1.38e-11
chr16	77251317	77251846	7.94	5.18	2.76	7.65e-13	1.39e-11
chr5	114913487	114914213	8.63	5.14	3.49	8.01e-13	1.45e-11
chr15	4027863	4028247	8.19	5.27	2.93	8.08e-13	1.46e-11
chr17	88123645	88124134	8.68	6.03	2.65	8.08e-13	1.46e-11
chr4	102635182	102636420	10.12	7.44	2.68	8.13e-13	1.47e-11
chr3	144604023	144604823	9.23	6.9	2.34	8.16e-13	1.48e-11
chr18	49479887	49480452	8.43	5.73	2.7	8.18e-13	1.48e-11
chr13	71437397	71438277	9.27	6.54	2.73	8.19e-13	1.48e-11
chr2	122161186	122162111	8.59	6.17	2.42	8.36e-13	1.51e-11
chr1	127958445	127959597	8.83	6.5	2.33	8.54e-13	1.54e-11
chr18	32153007	32153630	8.4	5.87	2.53	8.59e-13	1.55e-11
chr13	85430825	85431296	7.14	4.29	2.86	8.64e-13	1.56e-11
chr1	191662113	191662747	7.84	5.17	2.66	8.65e-13	1.56e-11
chr13	91702198	91702829	8.43	5.75	2.68	8.72e-13	1.57e-11
chr5	146916803	146917266	8.63	6.17	2.46	8.78e-13	1.58e-11
chr9	59544621	59545192	8.6	5.41	3.19	9e-13	1.62e-11
chr12	55344609	55345223	6.34	0.53	5.81	9.05e-13	1.63e-11
chr9	56370665	56371275	8.94	6.06	2.88	9.08e-13	1.63e-11
chr2	124684252	124685179	8.74	6.45	2.29	9.17e-13	1.65e-11
chr14	34764013	34764644	8.73	5.58	3.15	9.33e-13	1.67e-11
chr4	88476458	88477177	8.38	5.95	2.43	9.39e-13	1.68e-11
chr18	57836956	57837831	10.25	7.81	2.44	9.47e-13	1.7e-11
chr17	64092950	64094279	9.61	7.29	2.32	9.47e-13	1.7e-11
chr11	19835099	19835713	8.57	6.01	2.56	9.55e-13	1.71e-11
chr4	121002352	121003176	8.52	5.68	2.85	9.55e-13	1.71e-11
chr12	45010047	45010610	8.25	5.3	2.94	9.61e-13	1.72e-11
chr15	38602071	38602795	9.13	6.38	2.75	9.67e-13	1.73e-11
chr15	73434829	73435407	9.13	6	3.13	9.73e-13	1.74e-11
chr12	73265116	73265968	8.95	5.73	3.23	9.74e-13	1.74e-11
chr9	78022010	78022628	8.85	6.41	2.44	1.01e-12	1.8e-11
chr15	59448438	59449314	8.4	5.81	2.59	1.01e-12	1.8e-11
chr17	26605527	26605981	8.1	5.18	2.92	1.03e-12	1.83e-11
chr17	34510841	34511368	6.32	2.71	3.61	1.03e-12	1.85e-11
chr9	49744129	49745026	9.04	5.87	3.17	1.04e-12	1.85e-11
chr18	46476659	46477338	8.25	5.67	2.58	1.04e-12	1.85e-11
chr2	112443381	112443936	8.94	4.89	4.05	1.04e-12	1.85e-11
chr11	44417108	44418027	8.56	5.85	2.71	1.12e-12	1.98e-11
chr17	46273590	46274339	8.88	6.3	2.58	1.14e-12	2.02e-11
chr6	84422916	84423890	9.7	6.37	3.33	1.14e-12	2.03e-11
chr19	11234169	11234793	8.71	5.35	3.36	1.16e-12	2.05e-11
chr7	141164816	141165184	8.14	5.29	2.86	1.16e-12	2.06e-11
chr17	75110287	75111321	9.51	6.49	3.03	1.16e-12	2.06e-11
chr5	3538596	3539461	8.12	5.38	2.74	1.17e-12	2.07e-11
chr3	130755912	130756395	7.07	1.12	5.94	1.17e-12	2.08e-11
chr9	88599163	88599969	8.47	5.55	2.92	1.17e-12	2.08e-11
chr4	121021839	121022278	7.94	5.37	2.57	1.18e-12	2.09e-11
chr18	56358623	56359589	9.62	7.33	2.29	1.21e-12	2.15e-11
chr7	114181047	114181963	9.97	7.66	2.3	1.22e-12	2.16e-11
chr11	8443403	8444260	10.87	8.54	2.33	1.23e-12	2.17e-11
chr1	97657205	97657635	8.4	5.81	2.59	1.23e-12	2.18e-11
chr12	103099163	103099590	8.05	5.67	2.38	1.24e-12	2.19e-11
chr7	140121566	140121890	7.05	4.23	2.82	1.27e-12	2.24e-11
chr5	103774633	103775286	9.65	7.11	2.55	1.3e-12	2.28e-11
chr13	109242429	109242984	8.67	6.02	2.65	1.31e-12	2.31e-11
chr6	87005558	87006081	8.79	5.38	3.4	1.32e-12	2.32e-11
chr18	60756187	60756793	8.43	5.65	2.78	1.33e-12	2.34e-11
chr9	36848486	36849114	9.16	6.31	2.85	1.39e-12	2.44e-11
chr13	26940155	26940860	9.25	6.72	2.53	1.4e-12	2.45e-11
chr19	5345255	5346225	9.21	6.81	2.4	1.43e-12	2.51e-11
chr12	30032691	30033307	8.36	5.88	2.48	1.44e-12	2.53e-11
chr18	39800137	39800728	7.89	4.81	3.08	1.44e-12	2.53e-11
chr5	131814116	131815039	8.82	6.34	2.48	1.45e-12	2.54e-11
chr2	108622442	108623500	9.46	5.97	3.49	1.46e-12	2.56e-11
chr12	37614647	37615386	8.54	5.64	2.9	1.47e-12	2.57e-11
chr17	28913050	28913646	8.53	5.64	2.89	1.51e-12	2.64e-11
chr10	45537788	45538472	7.91	5.03	2.89	1.51e-12	2.64e-11
chr2	167949002	167949893	9.65	7	2.65	1.51e-12	2.64e-11
chrX	73567378	73567747	6.85	3.99	2.86	1.52e-12	2.66e-11
chr7	56113936	56114672	8.34	5.74	2.6	1.52e-12	2.66e-11
chr7	130834874	130835306	8.2	5.47	2.72	1.55e-12	2.71e-11
chr17	43279325	43280201	8.17	5.4	2.76	1.55e-12	2.71e-11
chr7	68021514	68022243	9.23	6.84	2.39	1.56e-12	2.71e-11
chr3	36340654	36341612	8.43	5.94	2.49	1.61e-12	2.8e-11
chr7	134335848	134336640	9.48	6.15	3.32	1.62e-12	2.82e-11
chr6	56718664	56718916	7.03	4.11	2.93	1.64e-12	2.85e-11
chr9	88276918	88277466	8.49	6.03	2.46	1.65e-12	2.86e-11
chr18	43469228	43470054	9.63	6.27	3.37	1.65e-12	2.87e-11
chrX	103298926	103299511	8.15	5.02	3.13	1.66e-12	2.89e-11
chr14	47302821	47303236	7.51	4.82	2.69	1.68e-12	2.91e-11
chr2	18004870	18005732	8.38	5.7	2.68	1.68e-12	2.92e-11
chr2	65223830	65224541	8.71	6.3	2.41	1.71e-12	2.96e-11
chr4	139330533	139330963	6.63	2.98	3.65	1.76e-12	3.05e-11
chr12	31271077	31271939	9.58	6.81	2.78	1.76e-12	3.05e-11
chr4	3703435	3704112	9.2	7.02	2.19	1.79e-12	3.09e-11
chr1	155040209	155040734	9.1	6.33	2.77	1.82e-12	3.15e-11
chr5	53490448	53491217	9.36	6.05	3.31	1.82e-12	3.15e-11
chr18	41864404	41865151	8.64	6.26	2.38	1.84e-12	3.18e-11
chr15	6650166	6650838	8.77	5.7	3.08	1.84e-12	3.18e-11
chr2	117838215	117838969	8.74	6.29	2.45	1.86e-12	3.21e-11
chr19	16898379	16899105	7.76	5.28	2.49	1.94e-12	3.35e-11
chr10	91230216	91230965	8.37	5.8	2.57	1.96e-12	3.38e-11
chr2	148197425	148198150	9.05	6.34	2.7	1.98e-12	3.4e-11
chr4	105934955	105935425	8.52	5.63	2.89	1.98e-12	3.4e-11
chr8	114743068	114743874	8.98	5.96	3.02	1.98e-12	3.41e-11
chr5	54578268	54579067	8.43	6.07	2.36	2e-12	3.44e-11
chr7	110108922	110109655	9.56	6.98	2.58	2e-12	3.44e-11
chr7	144684371	144685269	9.47	6.6	2.87	2.01e-12	3.45e-11
chr7	130860563	130861278	9.19	6.68	2.52	2.01e-12	3.46e-11
chr10	120616220	120617121	9.25	6.2	3.05	2.02e-12	3.46e-11
chr10	68472647	68473356	7.98	5.08	2.9	2.03e-12	3.49e-11
chr10	115332081	115332734	7.95	5.17	2.79	2.04e-12	3.51e-11
chr7	68656377	68657019	7.4	4.66	2.73	2.04e-12	3.51e-11
chr16	76390567	76391184	8.87	5.62	3.25	2.07e-12	3.55e-11
chr8	72144353	72144735	7.48	4.85	2.63	2.09e-12	3.57e-11
chr7	134287534	134288408	8.83	6.1	2.73	2.09e-12	3.57e-11
chr3	103377966	103378510	8.44	5.76	2.68	2.09e-12	3.58e-11
chr14	63131709	63132837	9.74	7.25	2.49	2.09e-12	3.58e-11
chr16	9211429	9212128	8.79	6.29	2.5	2.13e-12	3.64e-11
chr1	167269825	167271138	9.7	7.5	2.19	2.14e-12	3.66e-11
chr6	17549459	17550106	7.94	5.34	2.6	2.15e-12	3.68e-11
chr6	37398814	37399507	9.47	7.05	2.42	2.16e-12	3.69e-11
chr6	54961916	54962396	7.62	5.14	2.48	2.16e-12	3.69e-11
chr18	9270322	9271603	8.69	6.25	2.43	2.18e-12	3.72e-11
chr16	92623967	92624455	8.54	6.05	2.49	2.18e-12	3.72e-11
chr2	82813622	82814042	8.37	5.14	3.23	2.18e-12	3.73e-11
chr6	140725216	140725690	8.07	5.03	3.04	2.19e-12	3.74e-11
chr15	43609882	43610275	6.35	2.97	3.38	2.2e-12	3.75e-11
chr3	68138150	68138751	7.99	5.5	2.49	2.2e-12	3.76e-11
chr7	82363177	82363840	8.03	5.44	2.59	2.22e-12	3.79e-11
chr6	94742909	94743395	8.31	4.82	3.5	2.24e-12	3.82e-11
chr15	62079144	62079986	9.47	6.91	2.56	2.27e-12	3.86e-11
chr3	10258246	10258939	9.64	6.78	2.86	2.28e-12	3.87e-11
chrX	133892640	133893106	6.83	2.86	3.98	2.3e-12	3.91e-11
chr2	71640297	71640878	9.04	6.38	2.65	2.31e-12	3.92e-11
chr14	98626442	98627440	9.09	6.36	2.74	2.37e-12	4.02e-11
chr1	119217323	119217763	8.12	5.74	2.38	2.39e-12	4.05e-11
chr12	54834792	54835504	9.94	7.43	2.51	2.4e-12	4.07e-11
chr13	78496658	78497206	8.43	5.7	2.74	2.4e-12	4.07e-11
chr2	52037825	52038424	8.2	5.86	2.33	2.43e-12	4.11e-11
chr4	109460323	109460821	8.8	6.58	2.22	2.47e-12	4.18e-11
chr15	66883195	66884138	9.07	6.6	2.48	2.49e-12	4.22e-11
chr2	131944952	131945718	9.24	6.54	2.7	2.54e-12	4.29e-11
chr1	79697022	79697892	8.89	6.6	2.29	2.54e-12	4.29e-11
chr11	102810699	102811062	6.89	3.77	3.12	2.55e-12	4.31e-11
chr16	57401405	57402242	9.48	6.28	3.2	2.56e-12	4.32e-11
chr14	103500167	103500760	8.44	5.9	2.54	2.56e-12	4.33e-11
chr4	54355701	54356638	9.45	6.79	2.66	2.58e-12	4.36e-11
chrX	38430998	38431554	8.41	5.71	2.7	2.67e-12	4.51e-11
chr13	107562405	107562950	7.82	4.32	3.5	2.73e-12	4.59e-11
chr18	3480697	3481398	8.29	5.63	2.65	2.75e-12	4.63e-11
chr2	51222708	51223487	9.4	5.49	3.91	2.76e-12	4.65e-11
chr6	43524760	43525675	9.65	6.96	2.69	2.79e-12	4.7e-11
chr3	123558379	123558957	7.96	5.44	2.52	2.83e-12	4.76e-11
chr13	75798333	75798957	8.94	5.53	3.42	2.86e-12	4.8e-11
chr2	50824258	50825356	8.69	6.15	2.54	2.87e-12	4.82e-11
chr17	67995984	67996631	8.12	5.49	2.63	2.87e-12	4.82e-11
chr3	144518888	144519368	7.59	4.77	2.82	2.88e-12	4.84e-11
chr1	159889109	159889980	9.54	6.78	2.77	2.89e-12	4.85e-11
chr3	108781287	108782037	8.4	6.05	2.36	2.94e-12	4.94e-11
chr2	33465862	33466414	9.03	5.85	3.18	2.99e-12	5.01e-11
chr11	121745527	121746094	8.01	5.53	2.48	3e-12	5.03e-11
chr6	117379792	117380314	7.3	3.99	3.31	3.04e-12	5.09e-11
chr3	38254716	38255411	8.74	6.1	2.65	3.04e-12	5.1e-11
chr9	44552033	44552672	8.07	5.34	2.73	3.07e-12	5.14e-11
chr5	16869396	16870131	8.38	5.78	2.6	3.08e-12	5.16e-11
chr15	62286629	62287791	10.01	7.05	2.96	3.12e-12	5.22e-11
chr2	163493890	163494640	8.39	5.97	2.42	3.13e-12	5.23e-11
chr3	19185518	19186053	7.93	5.14	2.79	3.14e-12	5.24e-11
chr11	35837699	35838146	8.75	5.78	2.97	3.18e-12	5.31e-11
chr3	103830655	103831468	9.14	5.69	3.45	3.18e-12	5.32e-11
chr9	22385858	22386580	8.82	5.6	3.22	3.2e-12	5.34e-11
chr10	78338095	78338720	9.12	6.78	2.34	3.22e-12	5.37e-11
chr14	16677023	16677624	8.37	5.28	3.09	3.24e-12	5.4e-11
chr12	65331197	65332020	8.86	6.13	2.73	3.31e-12	5.51e-11
chr1	118324961	118325676	9.04	5.98	3.06	3.32e-12	5.54e-11
chr8	27262511	27262853	8.06	4.48	3.57	3.34e-12	5.56e-11
chr3	79542516	79543115	8.77	5.66	3.1	3.36e-12	5.59e-11
chr4	149049244	149050267	9.58	6.91	2.68	3.39e-12	5.64e-11
chr1	184752670	184753144	8.31	5.57	2.75	3.41e-12	5.67e-11
chr7	99580186	99580794	8.53	6.07	2.46	3.45e-12	5.73e-11
chr3	20281766	20282584	8.81	5.86	2.95	3.45e-12	5.73e-11
chr12	56144165	56144838	8.19	5.52	2.67	3.47e-12	5.78e-11
chr2	134275820	134276281	8.11	4.68	3.43	3.49e-12	5.8e-11
chr14	78362880	78363544	8.25	5.66	2.59	3.52e-12	5.85e-11
chr15	59728053	59728775	8.97	6.76	2.21	3.54e-12	5.88e-11
chrX	129770596	129771304	7.37	4.27	3.1	3.64e-12	6.04e-11
chr7	75633769	75634600	8.64	6.18	2.46	3.64e-12	6.04e-11
chr3	158464455	158465263	8.22	5.5	2.71	3.66e-12	6.08e-11
chr1	151906953	151907553	8.35	5.57	2.78	3.68e-12	6.11e-11
chr4	4723707	4724439	8.08	5.58	2.5	3.7e-12	6.14e-11
chr11	32435506	32436121	8.81	6.43	2.38	3.82e-12	6.33e-11
chr2	19702910	19703544	8.09	5.46	2.63	3.85e-12	6.37e-11
chr7	18862864	18863228	7.68	4.86	2.82	3.87e-12	6.41e-11
chr9	106377794	106378477	9.07	5.97	3.11	3.89e-12	6.44e-11
chr11	49829125	49830046	9.59	6.8	2.79	3.92e-12	6.48e-11
chr8	109087580	109088329	8.41	5.67	2.73	3.97e-12	6.55e-11
chr4	59830695	59831599	9.21	6.47	2.74	4.04e-12	6.67e-11
chr1	89730588	89731252	9.92	7.56	2.37	4.05e-12	6.68e-11
chr8	116735317	116735701	8.39	5.91	2.48	4.06e-12	6.7e-11
chr1	53473604	53474122	8.03	4.9	3.12	4.07e-12	6.72e-11
chr6	31324678	31325222	8.08	5.7	2.38	4.09e-12	6.74e-11
chrX	108728070	108728790	7.56	4.23	3.33	4.09e-12	6.75e-11
chr4	124808308	124808971	8.83	6.15	2.68	4.15e-12	6.85e-11
chr15	64622584	64623060	8	5.54	2.46	4.16e-12	6.86e-11
chr18	3767592	3768217	8.3	5.43	2.87	4.23e-12	6.97e-11
chr2	33908278	33908972	9.82	7.44	2.38	4.24e-12	6.98e-11
chr4	34556079	34556669	9.36	5.76	3.6	4.26e-12	7.01e-11
chr3	107488620	107489103	7.74	5.28	2.46	4.26e-12	7.01e-11
chr10	116296398	116296940	8.66	6.11	2.55	4.28e-12	7.03e-11
chr18	36405506	36406075	8.29	5.66	2.64	4.28e-12	7.04e-11
chr11	105901313	105902015	8.68	6.22	2.46	4.28e-12	7.04e-11
chr8	118349874	118350967	8.85	6.64	2.21	4.29e-12	7.06e-11
chr13	56549322	56549862	8.47	6.1	2.37	4.43e-12	7.27e-11
chr7	123371520	123371960	8.05	5.6	2.45	4.46e-12	7.32e-11
chr11	40401994	40402871	8.87	6.07	2.8	4.52e-12	7.41e-11
chr2	58513088	58513673	8.46	5.78	2.68	4.68e-12	7.66e-11
chr9	25319664	25320027	5.66	0.53	5.13	4.74e-12	7.76e-11
chr17	47294016	47294581	8	5.33	2.67	4.76e-12	7.79e-11
chr13	75794264	75794608	8	5.63	2.37	4.8e-12	7.84e-11
chr3	136722460	136722891	7.73	5.13	2.6	4.8e-12	7.85e-11
chr3	53109621	53110366	8.85	5.99	2.86	4.82e-12	7.89e-11
chr1	186926206	186926779	7.71	5.15	2.56	4.83e-12	7.89e-11
chr10	56581865	56582640	9.74	7.47	2.28	4.84e-12	7.9e-11
chr10	58416497	58417231	9.13	6.22	2.9	4.84e-12	7.91e-11
chrX	6252852	6253277	6.8	3.1	3.71	4.87e-12	7.95e-11
chr17	33702150	33702595	7.44	4.58	2.86	4.87e-12	7.95e-11
chr3	122322095	122322891	8.89	6.3	2.59	4.88e-12	7.96e-11
chr8	110815254	110815782	7.85	4.33	3.52	4.93e-12	8.04e-11
chr12	72489961	72490522	8.75	5.87	2.88	5.01e-12	8.17e-11
chr1	55048934	55049545	8.73	5.95	2.78	5.02e-12	8.18e-11
chr9	7221415	7222307	9.29	6.39	2.9	5.07e-12	8.26e-11
chr2	131376911	131377735	7.8	5.18	2.62	5.15e-12	8.39e-11
chr18	64692439	64693029	8.49	5.2	3.3	5.19e-12	8.45e-11
chr10	107994596	107995521	8.23	5.64	2.58	5.21e-12	8.48e-11
chr15	13244275	13244949	9.37	7	2.37	5.24e-12	8.52e-11
chr5	86757825	86758689	8.39	5.54	2.85	5.29e-12	8.6e-11
chr17	8552394	8553132	8.93	6.79	2.15	5.3e-12	8.62e-11
chr18	46697917	46698913	8.9	5.92	2.98	5.31e-12	8.63e-11
chr13	74296353	74296816	7.73	5.12	2.61	5.33e-12	8.65e-11
chr18	61837373	61838113	9.1	5.85	3.25	5.34e-12	8.68e-11
chr14	99373547	99374077	7.39	3.86	3.53	5.38e-12	8.74e-11
chr2	140904246	140905000	8.74	5.75	2.99	5.4e-12	8.78e-11
chr11	16560455	16560973	7.92	5.09	2.83	5.42e-12	8.8e-11
chr4	149979511	149980288	9.72	7.23	2.49	5.45e-12	8.85e-11
chr2	94051813	94052440	9.15	6.06	3.1	5.51e-12	8.94e-11
chr18	44714236	44714875	8.25	5.85	2.4	5.52e-12	8.96e-11
chr13	52239668	52239960	6.88	3.99	2.89	5.6e-12	9.07e-11
chr13	92241328	92242144	9.54	7.31	2.23	5.67e-12	9.19e-11
chr8	85301940	85302330	7.69	4.7	3	5.67e-12	9.19e-11
chr8	128272690	128273494	9.42	6.91	2.51	5.89e-12	9.51e-11
chr6	32528012	32528804	8.7	6.16	2.54	5.98e-12	9.66e-11
chr13	91911063	91911845	8.46	5.96	2.5	6.15e-12	9.93e-11
chr3	103987900	103988543	8.93	4.9	4.03	6.16e-12	9.93e-11
chr3	142252076	142252784	8.29	5.67	2.62	6.18e-12	9.96e-11
chr17	13802783	13803387	7.87	5.14	2.72	6.21e-12	1e-10
chrX	69540808	69541253	7.07	3.97	3.1	6.36e-12	1.02e-10
chr10	116995666	116996631	9.2	6.43	2.78	6.39e-12	1.03e-10
chr14	98929092	98929804	8.26	5.72	2.54	6.44e-12	1.04e-10
chr6	73800592	73801311	8.45	5.66	2.78	6.47e-12	1.04e-10
chr8	88339911	88340711	8.75	6.02	2.72	6.53e-12	1.05e-10
chr11	106061304	106061831	7.5	4.65	2.85	6.58e-12	1.06e-10
chr8	118286177	118287128	9.91	7.81	2.1	6.65e-12	1.07e-10
chr3	67961791	67962663	9.1	5.84	3.27	6.7e-12	1.07e-10
chr14	19986491	19987632	8.77	6.51	2.26	6.75e-12	1.08e-10
chr14	27822877	27823502	7.12	4.1	3.02	6.75e-12	1.08e-10
chr17	42741463	42742307	8.38	5.74	2.64	6.8e-12	1.09e-10
chr11	107113097	107113665	8.56	5.82	2.75	6.83e-12	1.09e-10
chr13	26640718	26641112	6.86	3.92	2.94	6.9e-12	1.11e-10
chr10	68008097	68008870	9.03	6.35	2.68	7.04e-12	1.13e-10
chrX	152764013	152764651	8.09	5.17	2.92	7.07e-12	1.13e-10
chr12	100438945	100439800	9.3	7.01	2.3	7.17e-12	1.15e-10
chr16	30465651	30466384	8.87	6.52	2.35	7.26e-12	1.16e-10
chr12	33100516	33100922	6.91	4.11	2.8	7.4e-12	1.18e-10
chr8	68157142	68157624	8.02	5.2	2.83	7.49e-12	1.2e-10
chr10	27988030	27988518	8.17	5.62	2.55	7.52e-12	1.2e-10
chr10	17518526	17519261	8.54	6.05	2.49	7.54e-12	1.2e-10
chr16	25058014	25058387	7.73	4.91	2.82	7.59e-12	1.21e-10
chr11	113536283	113537414	9.8	7.19	2.61	7.63e-12	1.22e-10
chr12	24895308	24895831	8.26	5.53	2.73	7.64e-12	1.22e-10
chr1	170080872	170081799	8.88	4.86	4.02	7.74e-12	1.23e-10
chrX	106135613	106136504	7.97	5.03	2.94	7.76e-12	1.24e-10
chr3	56261942	56262641	8.37	5.26	3.1	7.81e-12	1.24e-10
chr1	34122913	34123759	9.47	7.01	2.45	7.81e-12	1.24e-10
chr4	148523449	148523949	8.02	5.7	2.31	8.04e-12	1.28e-10
chr8	45606962	45607502	8.49	5.38	3.11	8.17e-12	1.3e-10
chr8	8487588	8488232	8.27	5.64	2.62	8.24e-12	1.31e-10
chr7	98514335	98514798	7.68	4.34	3.34	8.28e-12	1.31e-10
chr9	25590707	25591152	8.58	5.22	3.36	8.31e-12	1.32e-10
chr10	111874167	111875057	8.65	6.02	2.63	8.34e-12	1.32e-10
chr19	41495261	41495970	8.4	5.49	2.91	8.38e-12	1.33e-10
chr2	4477245	4477693	8.62	5.35	3.27	8.45e-12	1.34e-10
chr16	84989865	84990466	9.05	6.74	2.3	8.51e-12	1.35e-10
chr9	99719824	99720621	8.41	5.8	2.62	8.53e-12	1.35e-10
chr15	41028047	41028754	8.92	6.03	2.89	8.67e-12	1.37e-10
chr6	122869809	122870211	7.66	4.98	2.68	8.74e-12	1.38e-10
chr14	52004009	52004671	8.57	6.37	2.2	9e-12	1.42e-10
chr1	60862844	60863548	9.48	6.86	2.62	9.05e-12	1.43e-10
chr15	83602426	83603222	9.35	6.55	2.8	9.08e-12	1.43e-10
chr14	62812685	62813139	7.66	5.08	2.58	9.12e-12	1.44e-10
chr2	3659286	3660088	8.64	5.66	2.98	9.15e-12	1.44e-10
chr17	17845253	17846044	8.48	5.85	2.63	9.28e-12	1.46e-10
chr1	21008555	21009585	9.06	6.96	2.1	9.28e-12	1.46e-10
chr15	36044031	36044651	7.45	4.73	2.73	9.34e-12	1.47e-10
chr15	43179305	43180059	8.19	5.39	2.8	9.5e-12	1.5e-10
chr5	66642169	66642741	7.77	5.19	2.58	9.59e-12	1.51e-10
chr11	65448320	65448911	8.82	5.59	3.22	9.68e-12	1.52e-10
chr12	41927368	41928128	7.56	4.65	2.92	9.73e-12	1.53e-10
chr5	131884385	131884931	8.78	5.3	3.48	9.89e-12	1.55e-10
chr4	69867615	69868555	8.56	5.96	2.59	9.9e-12	1.55e-10
chr6	143640557	143641108	8.38	5.36	3.02	9.95e-12	1.56e-10
chr6	35184621	35185453	8.15	5.6	2.56	9.99e-12	1.57e-10
chr11	104624628	104625696	10.06	7.07	2.99	1.01e-11	1.58e-10
chrX	42139634	42140462	8.33	5.51	2.81	1.01e-11	1.59e-10
chr18	77879766	77880565	8.85	6.13	2.72	1.03e-11	1.62e-10
chr1	168598004	168598988	9.11	6.32	2.79	1.03e-11	1.62e-10
chr7	16207473	16207924	8.41	5.66	2.75	1.04e-11	1.62e-10
chr2	135474063	135474635	7.55	5.03	2.53	1.05e-11	1.64e-10
chr11	32355277	32355777	8.61	6.13	2.48	1.05e-11	1.64e-10
chr5	104375030	104375589	8.1	5.05	3.04	1.06e-11	1.66e-10
chr2	5614743	5615354	8.53	6.2	2.33	1.06e-11	1.66e-10
chr16	14131715	14132322	7.95	5.53	2.42	1.06e-11	1.66e-10
chr14	11511068	11511999	8.07	5.31	2.76	1.07e-11	1.67e-10
chr9	5356664	5357366	7.75	5.31	2.44	1.07e-11	1.67e-10
chr9	25318155	25318474	6.3	3.22	3.08	1.08e-11	1.69e-10
chr7	125681864	125682565	8.66	5.86	2.81	1.09e-11	1.7e-10
chr9	40768005	40768414	6.71	3.85	2.86	1.09e-11	1.7e-10
chr1	91248210	91248587	7.57	4.53	3.04	1.09e-11	1.7e-10
chr4	95025861	95026665	8.9	5.55	3.35	1.1e-11	1.72e-10
chr2	5613717	5614423	9.25	6.76	2.48	1.11e-11	1.73e-10
chr4	95667559	95668034	7.86	5.15	2.71	1.14e-11	1.78e-10
chr11	20558061	20558552	8.33	5.49	2.84	1.16e-11	1.8e-10
chrX	106949419	106950278	8.58	5.17	3.41	1.18e-11	1.83e-10
chr11	65209395	65210160	8.71	6.5	2.21	1.18e-11	1.84e-10
chr1	126602057	126602675	8.21	5.83	2.38	1.19e-11	1.84e-10
chr5	97304768	97305509	9.25	6.4	2.85	1.19e-11	1.85e-10
chr12	69898097	69898784	8.71	5.65	3.06	1.22e-11	1.88e-10
chr2	34770140	34770569	8.24	4.45	3.79	1.23e-11	1.91e-10
chr12	16850576	16851301	9.26	6.34	2.91	1.23e-11	1.91e-10
chr8	115162269	115163055	8.75	6.57	2.17	1.25e-11	1.93e-10
chr4	123792425	123793269	9.19	6.63	2.56	1.25e-11	1.93e-10
chr11	83063813	83064572	8.16	5.7	2.46	1.26e-11	1.94e-10
chr8	25465455	25466315	9.09	6.79	2.3	1.26e-11	1.94e-10
chr7	24387071	24387872	9.03	6.54	2.49	1.27e-11	1.96e-10
chr15	51728865	51729334	7.46	4.51	2.95	1.27e-11	1.96e-10
chr7	112204273	112205042	9.25	6.69	2.56	1.27e-11	1.96e-10
chr16	55555137	55555855	9.5	7.36	2.14	1.27e-11	1.97e-10
chr3	152568610	152569575	9.15	6.21	2.94	1.27e-11	1.97e-10
chr11	8579672	8580413	8.84	6.59	2.24	1.29e-11	1.99e-10
chr16	23449885	23450421	8.61	5.57	3.04	1.29e-11	1.99e-10
chr13	32219915	32220495	8.82	5.23	3.59	1.29e-11	1.99e-10
chr6	129417908	129418500	7.11	4.38	2.72	1.3e-11	2e-10
chr3	57501582	57502171	8.47	6.19	2.28	1.3e-11	2.01e-10
chr14	60526807	60527177	7.36	4.28	3.08	1.31e-11	2.02e-10
chr8	64672821	64673352	8.36	4.62	3.74	1.32e-11	2.04e-10
chr10	121443708	121444211	8.45	5.96	2.49	1.34e-11	2.06e-10
chr18	75363159	75363634	7.88	5.2	2.68	1.35e-11	2.08e-10
chr1	157380277	157381206	9.4	6.55	2.85	1.36e-11	2.09e-10
chr11	33655839	33656563	8.65	6.03	2.62	1.36e-11	2.09e-10
chr11	20117211	20117420	6.31	2.55	3.76	1.37e-11	2.1e-10
chr13	10636687	10637513	9.6	6.84	2.76	1.38e-11	2.12e-10
chr12	21139497	21139906	8.26	6.06	2.2	1.38e-11	2.12e-10
chr18	54905313	54905773	8.97	6.36	2.61	1.38e-11	2.12e-10
chr2	7055910	7056865	8.89	5.7	3.18	1.39e-11	2.14e-10
chr5	81784784	81785234	7.4	4.51	2.89	1.39e-11	2.14e-10
chr14	33258227	33258775	8.26	5.26	3	1.4e-11	2.15e-10
chr12	54187227	54188556	10.08	7.73	2.35	1.4e-11	2.15e-10
chr15	73590232	73590781	8.52	5.95	2.57	1.42e-11	2.18e-10
chr9	67274859	67275512	7.84	4.49	3.35	1.44e-11	2.2e-10
chr2	136920713	136921455	8.77	6.08	2.68	1.46e-11	2.23e-10
chr13	26920597	26921136	8.36	5.89	2.47	1.46e-11	2.23e-10
chr3	79977587	79978442	9.4	6.64	2.76	1.46e-11	2.24e-10
chr8	94372831	94373478	8.86	6.72	2.15	1.46e-11	2.24e-10
chr6	17211255	17211832	9.11	6.14	2.97	1.47e-11	2.24e-10
chr9	59537665	59538273	8.06	5.72	2.33	1.47e-11	2.25e-10
chr14	32516057	32516722	9.24	7.07	2.16	1.48e-11	2.26e-10
chr5	45295166	45295771	8.22	5.83	2.39	1.48e-11	2.27e-10
chr1	16702756	16703489	8.55	5.16	3.39	1.48e-11	2.27e-10
chr15	26833756	26834151	7.11	4.12	2.98	1.49e-11	2.28e-10
chr19	55542264	55543061	8.67	6.19	2.48	1.49e-11	2.28e-10
chr6	20037575	20038284	7.89	5.34	2.55	1.49e-11	2.28e-10
chr14	55724359	55725075	9.34	6.39	2.95	1.52e-11	2.32e-10
chr4	139336957	139337449	6.24	1.12	5.11	1.56e-11	2.37e-10
chr11	48819771	48820157	8.19	4.47	3.71	1.61e-11	2.45e-10
chr6	53130680	53131363	9.78	6.97	2.81	1.62e-11	2.47e-10
chr2	143853409	143854012	8.01	5.63	2.38	1.65e-11	2.51e-10
chr12	4859502	4860014	7.31	4.81	2.5	1.67e-11	2.54e-10
chr19	34390704	34391385	8.47	5.74	2.74	1.69e-11	2.56e-10
chr5	3650285	3650735	8.01	5.36	2.65	1.71e-11	2.59e-10
chr2	13450589	13451517	8.57	5.87	2.7	1.73e-11	2.62e-10
chr2	57353421	57354288	8.34	6.01	2.33	1.73e-11	2.62e-10
chr9	88325826	88326448	8.42	5.31	3.11	1.74e-11	2.63e-10
chrX	53735056	53735524	6.98	4.23	2.75	1.74e-11	2.64e-10
chr5	47472078	47472976	8.9	6.61	2.3	1.75e-11	2.64e-10
chr10	71349312	71349793	8.17	5.41	2.76	1.75e-11	2.65e-10
chr3	90374167	90374883	8.19	5.64	2.55	1.75e-11	2.65e-10
chr16	10754339	10755004	9.6	6.64	2.96	1.76e-11	2.66e-10
chr4	4634931	4635803	8.94	6.04	2.9	1.76e-11	2.66e-10
chr6	108824995	108825457	8.63	6.22	2.4	1.76e-11	2.67e-10
chr5	145204997	145205558	8.51	5.36	3.15	1.76e-11	2.67e-10
chr6	42419239	42419993	7.7	5.18	2.52	1.77e-11	2.67e-10
chr13	40859418	40860290	9.29	6.9	2.39	1.78e-11	2.69e-10
chr5	5418954	5419701	8.53	6.04	2.49	1.81e-11	2.74e-10
chr11	105823227	105823710	8.02	4.7	3.32	1.82e-11	2.74e-10
chr13	107798082	107798520	7.73	5.19	2.54	1.82e-11	2.74e-10
chr18	39741197	39742143	8.74	5.67	3.07	1.82e-11	2.74e-10
chr19	38025211	38025763	8.54	5.76	2.78	1.82e-11	2.75e-10
chr6	8095867	8096326	6.34	0.53	5.81	1.84e-11	2.78e-10
chr9	13442049	13442754	8.59	6.35	2.24	1.85e-11	2.79e-10
chr6	17353735	17354665	9.45	7.04	2.41	1.86e-11	2.8e-10
chr13	92919776	92920242	8.28	5.41	2.87	1.86e-11	2.8e-10
chr15	39552813	39553369	7.73	4.81	2.92	1.89e-11	2.85e-10
chr2	74973374	74973831	8.15	5.74	2.41	1.9e-11	2.86e-10
chr13	48609011	48609696	8.71	5.26	3.45	1.91e-11	2.88e-10
chr18	43514873	43515711	8.94	6.68	2.26	1.92e-11	2.9e-10
chr10	28661798	28662867	9.19	6.3	2.89	1.94e-11	2.92e-10
chr14	20499969	20500467	7.68	4.77	2.91	1.95e-11	2.94e-10
chr11	8589185	8589912	8.69	6.64	2.06	1.96e-11	2.94e-10
chr16	51985418	51985980	8.3	5.4	2.91	1.97e-11	2.96e-10
chr14	17917874	17918374	8.27	5.24	3.03	1.99e-11	2.99e-10
chr1	168390532	168391249	7.93	5.28	2.64	1.99e-11	2.99e-10
chr6	118069636	118069961	7.23	4.06	3.17	1.99e-11	3e-10
chr3	101070092	101070759	8.55	6.11	2.44	2e-11	3.01e-10
chr12	112617145	112617614	7.82	5.44	2.38	2.02e-11	3.04e-10
chr9	32292346	32293189	8.79	6.35	2.44	2.03e-11	3.05e-10
chr18	73751768	73752577	9.09	6.47	2.62	2.04e-11	3.06e-10
chr6	146935289	146935679	7.71	5.01	2.7	2.06e-11	3.09e-10
chr1	69440598	69441438	8.6	6.09	2.51	2.09e-11	3.13e-10
chr17	67988804	67989624	9.96	7.59	2.36	2.09e-11	3.14e-10
chr14	101340338	101341164	9.17	5.45	3.72	2.1e-11	3.15e-10
chr11	44948466	44949014	7.96	4.89	3.07	2.13e-11	3.18e-10
chr2	16928917	16929489	8.77	5.73	3.04	2.13e-11	3.19e-10
chr6	35542641	35543333	8.78	5.39	3.39	2.14e-11	3.21e-10
chr4	126379274	126379656	5.6	0.53	5.07	2.15e-11	3.22e-10
chr1	37954483	37955189	8.43	5.88	2.55	2.17e-11	3.25e-10
chr14	61171410	61171950	9.81	6.74	3.07	2.18e-11	3.25e-10
chr17	6429654	6430371	8.29	1.84	6.45	2.19e-11	3.28e-10
chr10	8870106	8870837	10.09	7.82	2.27	2.22e-11	3.32e-10
chr15	50172187	50172762	8.01	5.3	2.72	2.23e-11	3.33e-10
chr16	20191966	20192692	7.94	5.45	2.48	2.23e-11	3.33e-10
chr15	25577417	25578059	8.41	5.55	2.86	2.23e-11	3.34e-10
chr4	10357188	10358127	9.07	6.69	2.38	2.25e-11	3.35e-10
chr17	68164722	68165795	9.16	6.87	2.29	2.25e-11	3.36e-10
chr8	80962049	80962880	8.75	6.1	2.65	2.27e-11	3.38e-10
chr13	9190983	9191812	10.09	7.66	2.43	2.27e-11	3.39e-10
chr4	95083926	95084348	7.06	4.28	2.78	2.28e-11	3.4e-10
chr17	53587022	53587826	8.99	6.81	2.18	2.29e-11	3.42e-10
chr3	133626393	133627069	8.21	5.69	2.51	2.3e-11	3.42e-10
chr18	73762211	73763210	8.92	6.49	2.43	2.32e-11	3.45e-10
chr16	51989233	51989629	7.76	4.61	3.15	2.33e-11	3.46e-10
chr5	73344169	73344810	7.78	5.28	2.5	2.33e-11	3.46e-10
chr7	123110148	123110550	8.42	5.44	2.98	2.33e-11	3.46e-10
chr14	120373413	120374173	9.06	6.7	2.37	2.36e-11	3.51e-10
chr7	139415317	139416092	8.53	6.33	2.2	2.36e-11	3.51e-10
chr2	20894015	20894562	8.21	5.65	2.55	2.38e-11	3.54e-10
chr10	7473298	7474179	9.56	7.53	2.03	2.38e-11	3.54e-10
chr9	6336015	6336786	8.23	5.56	2.66	2.39e-11	3.56e-10
chrX	169844221	169844981	7.19	4.17	3.03	2.42e-11	3.6e-10
chr14	8096888	8097389	7.92	4.1	3.82	2.44e-11	3.63e-10
chr1	186604021	186604672	8.43	5.61	2.82	2.45e-11	3.64e-10
chr2	134538408	134538890	7.55	4.18	3.37	2.49e-11	3.69e-10
chr3	57385311	57385736	6.69	3.67	3.02	2.49e-11	3.7e-10
chr7	37320026	37320589	8.13	5.61	2.52	2.53e-11	3.75e-10
chr3	37313117	37313830	9.07	6.6	2.46	2.53e-11	3.75e-10
chr10	83908896	83909423	7.15	4.52	2.62	2.59e-11	3.83e-10
chr13	101540322	101541078	9.44	6.57	2.87	2.62e-11	3.87e-10
chr2	4480103	4480684	9.14	6.16	2.97	2.63e-11	3.89e-10
chr11	7295676	7296494	7.68	5.28	2.4	2.64e-11	3.91e-10
chr7	116100020	116100766	8.66	5.95	2.7	2.64e-11	3.91e-10
chr17	56334974	56335531	8.09	5.17	2.92	2.65e-11	3.93e-10
chr5	72725163	72725808	7.9	5.12	2.78	2.68e-11	3.96e-10
chr3	144496753	144497445	8.63	6.29	2.34	2.69e-11	3.97e-10
chr8	111059022	111059467	7.77	5	2.77	2.69e-11	3.98e-10
chr2	148743838	148744598	8.69	4.99	3.7	2.7e-11	3.99e-10
chr6	108340852	108341610	9.22	5.65	3.57	2.7e-11	3.99e-10
chr5	93105355	93105829	7.77	4.68	3.09	2.73e-11	4.02e-10
chr12	77972143	77972567	7.72	5.08	2.64	2.74e-11	4.05e-10
chr1	152669494	152670256	8.39	5.59	2.8	2.75e-11	4.05e-10
chr5	16469647	16470719	9.02	6.87	2.15	2.78e-11	4.1e-10
chr10	7420834	7421497	6.38	2.84	3.54	2.79e-11	4.11e-10
chr11	4101852	4102344	7.9	5.26	2.64	2.8e-11	4.13e-10
chr2	101862093	101863318	8.89	6.73	2.16	2.8e-11	4.13e-10
chr10	31467126	31467798	8.39	5.36	3.03	2.81e-11	4.14e-10
chr14	21278908	21279772	9.24	6.2	3.04	2.84e-11	4.18e-10
chr2	181498610	181499073	8.04	5.38	2.66	2.85e-11	4.19e-10
chr3	115649690	115650072	7.94	4.95	2.99	2.85e-11	4.2e-10
chr10	19687616	19688205	7.71	4.99	2.72	2.86e-11	4.2e-10
chr13	73702554	73703354	8.46	6.25	2.21	2.86e-11	4.2e-10
chr1	185224443	185225080	7.96	5.35	2.61	2.87e-11	4.23e-10
chr2	26082648	26083339	8.21	5.8	2.41	2.9e-11	4.27e-10
chr13	45680474	45681097	8.47	6.11	2.35	2.94e-11	4.32e-10
chr6	113362053	113362729	8.42	5.45	2.97	2.95e-11	4.33e-10
chr6	50379019	50379674	8.39	6.13	2.26	2.95e-11	4.34e-10
chr9	98361012	98361602	8.49	6.23	2.27	2.95e-11	4.34e-10
chr11	82032666	82033477	9.06	6.72	2.34	3.01e-11	4.41e-10
chr16	42440712	42441366	8.32	5.9	2.42	3.1e-11	4.54e-10
chr5	149584128	149584758	8.79	6.44	2.35	3.1e-11	4.54e-10
chr4	115658577	115659698	8.99	6.1	2.89	3.13e-11	4.58e-10
chr12	117430807	117431355	8.27	5.81	2.46	3.13e-11	4.58e-10
chr2	35271751	35272357	7.87	5.61	2.26	3.14e-11	4.6e-10
chr15	9748357	9749131	9.1	6.7	2.39	3.15e-11	4.61e-10
chr14	45732381	45732865	7.53	4.66	2.87	3.17e-11	4.64e-10
chr11	62700966	62701945	8.48	6.25	2.23	3.18e-11	4.66e-10
chr11	80602638	80603455	8.57	6.35	2.22	3.2e-11	4.68e-10
chr2	137757150	137757826	8.97	6.92	2.05	3.21e-11	4.69e-10
chr4	26339655	26340191	8.04	5.44	2.6	3.22e-11	4.7e-10
chr5	107087147	107087829	8.68	6.1	2.58	3.22e-11	4.7e-10
chr8	61831760	61832451	8.78	5.92	2.86	3.22e-11	4.71e-10
chr18	56688294	56688801	8.6	5.44	3.16	3.23e-11	4.72e-10
chr5	110181668	110182315	8.36	5.9	2.46	3.24e-11	4.73e-10
chr10	44518601	44519362	8.61	5.98	2.63	3.26e-11	4.75e-10
chr1	22644223	22644818	8.03	5.53	2.49	3.28e-11	4.78e-10
chr16	14029785	14030424	8.4	5.57	2.83	3.29e-11	4.79e-10
chr17	64439533	64440012	8.6	6.29	2.31	3.3e-11	4.82e-10
chr13	29903283	29903891	8.28	5.96	2.32	3.35e-11	4.88e-10
chr2	70435661	70436471	8.73	4.85	3.88	3.36e-11	4.89e-10
chr16	97716411	97717233	9.19	6.64	2.55	3.36e-11	4.89e-10
chr7	123411030	123411668	8.51	6.09	2.42	3.39e-11	4.93e-10
chr6	17142948	17143525	8.31	5.45	2.86	3.43e-11	4.99e-10
chr6	48828910	48829410	7.91	4.66	3.25	3.44e-11	5e-10
chr14	66846384	66846784	8.74	6.67	2.07	3.45e-11	5.01e-10
chr2	72077838	72078482	8.29	6.05	2.23	3.46e-11	5.03e-10
chr9	88273258	88273688	7.75	5.14	2.61	3.52e-11	5.11e-10
chr18	57663059	57663839	8.5	5.42	3.08	3.53e-11	5.12e-10
chr13	36203027	36203420	7.59	4.89	2.7	3.55e-11	5.15e-10
chr3	144704957	144705535	7.69	4.71	2.98	3.58e-11	5.2e-10
chr7	34327490	34328066	8.37	6.17	2.21	3.6e-11	5.22e-10
chr7	118507820	118508272	8.2	4.66	3.54	3.62e-11	5.25e-10
chr1	33461182	33461966	8.66	6.04	2.62	3.62e-11	5.25e-10
chr14	62720230	62720530	6.09	2.51	3.58	3.7e-11	5.36e-10
chr6	72533516	72533996	7.27	4.65	2.62	3.7e-11	5.36e-10
chr12	16920197	16920920	8.05	5.43	2.62	3.7e-11	5.36e-10
chr4	72669942	72670674	8.4	5.9	2.49	3.75e-11	5.43e-10
chr8	117050661	117051170	7.72	5.02	2.7	3.78e-11	5.46e-10
chr7	19939612	19940622	8.57	5.54	3.03	3.79e-11	5.48e-10
chr17	90696144	90697027	9.03	6.24	2.8	3.79e-11	5.48e-10
chr2	101739782	101740367	8.71	5.78	2.92	3.82e-11	5.51e-10
chr12	66734501	66735068	8.34	5.63	2.71	3.88e-11	5.59e-10
chr3	60954071	60955004	9.32	6.6	2.72	3.88e-11	5.6e-10
chr3	94913672	94914272	8.27	5.4	2.88	3.91e-11	5.64e-10
chr4	107374546	107375197	8.14	5.66	2.48	3.92e-11	5.65e-10
chr7	112237748	112238367	8.29	6.07	2.22	3.94e-11	5.68e-10
chr9	88552535	88552888	7.69	4.88	2.82	3.95e-11	5.69e-10
chr11	22719302	22720027	8.76	6.28	2.48	3.97e-11	5.71e-10
chr15	26365361	26365983	8.4	5.63	2.77	3.97e-11	5.71e-10
chr3	126384593	126385478	9.3	6.31	3	3.99e-11	5.74e-10
chr5	38280082	38280458	7.26	4.77	2.49	3.99e-11	5.74e-10
chr17	75936495	75937398	8.79	6.09	2.7	3.99e-11	5.74e-10
chr10	5608069	5609338	8.57	5.88	2.69	4e-11	5.76e-10
chr18	66148531	66148920	5.84	0.53	5.31	4.03e-11	5.79e-10
chr1	157343481	157343919	8.34	5.81	2.54	4.04e-11	5.81e-10
chr9	78050307	78051010	8.9	6.1	2.8	4.12e-11	5.91e-10
chr17	72955442	72955908	7.98	5.57	2.41	4.16e-11	5.96e-10
chr17	67304783	67305252	7.68	5.25	2.43	4.17e-11	5.98e-10
chr11	89186842	89187664	9.38	7.38	2	4.19e-11	6e-10
chr7	110941210	110942288	9	6.85	2.15	4.22e-11	6.05e-10
chr4	62291101	62291631	8.63	6.38	2.25	4.24e-11	6.06e-10
chr15	62500735	62501553	8.71	6.11	2.6	4.24e-11	6.07e-10
chr3	151408208	151408621	7.11	4.11	3	4.26e-11	6.1e-10
chr12	17184204	17184888	8.45	6.01	2.44	4.28e-11	6.12e-10
chr2	93979717	93980233	8.5	5.52	2.98	4.3e-11	6.14e-10
chr9	65550404	65551631	9.88	7.63	2.24	4.32e-11	6.18e-10
chr7	101051794	101052559	9.72	7.45	2.27	4.37e-11	6.24e-10
chr13	26980315	26981026	8.3	5.73	2.57	4.39e-11	6.27e-10
chr7	84334010	84334385	7.67	5.02	2.65	4.4e-11	6.28e-10
chr10	16589215	16589897	7.98	5.43	2.55	4.48e-11	6.39e-10
chr1	164993156	164994463	9.77	7.76	2.01	4.48e-11	6.4e-10
chr9	42392648	42393492	8.91	6.33	2.58	4.5e-11	6.42e-10
chr3	145951830	145952236	7.74	4.92	2.82	4.53e-11	6.46e-10
chr13	70902700	70903406	8.43	6.02	2.41	4.53e-11	6.46e-10
chr3	98027225	98027827	7.93	5.43	2.49	4.55e-11	6.49e-10
chr7	103860874	103861672	8.25	5.68	2.58	4.56e-11	6.5e-10
chr15	7598461	7598888	7.4	4.77	2.63	4.59e-11	6.54e-10
chrX	95963164	95963837	8.99	5.3	3.69	4.6e-11	6.55e-10
chr7	58800648	58801425	8.94	6.68	2.26	4.62e-11	6.57e-10
chr8	25331014	25331791	8.91	6.74	2.17	4.66e-11	6.63e-10
chr5	5648736	5649542	8.45	6.17	2.28	4.68e-11	6.65e-10
chr11	95415744	95416396	8.3	5.69	2.61	4.68e-11	6.65e-10
chr16	21856871	21857582	9.15	5.92	3.23	4.71e-11	6.69e-10
chr2	103670054	103670720	9.04	6.26	2.77	4.71e-11	6.69e-10
chr15	25789240	25790002	9.4	7.06	2.34	4.72e-11	6.71e-10
chr11	86050366	86050810	7.38	4.48	2.9	4.74e-11	6.73e-10
chr9	66503541	66504352	7.81	5.27	2.54	4.74e-11	6.74e-10
chr16	65999321	65999912	8.91	5.74	3.16	4.77e-11	6.77e-10
chr5	39145559	39146372	9.28	6.47	2.81	4.77e-11	6.78e-10
chr6	137100228	137100820	7.82	5.2	2.62	4.8e-11	6.81e-10
chr5	147388514	147389461	8.93	6.48	2.45	4.81e-11	6.83e-10
chr8	71310408	71310760	7.43	4.85	2.58	4.82e-11	6.83e-10
chr10	117717454	117718151	8.65	6.11	2.54	4.82e-11	6.83e-10
chr5	44156730	44157233	8.66	6.31	2.35	4.86e-11	6.88e-10
chr8	128895052	128895635	7.39	4.93	2.47	4.86e-11	6.89e-10
chr13	30642005	30642568	7.85	5.41	2.44	4.88e-11	6.91e-10
chr7	105812627	105813003	7.86	5.52	2.34	4.91e-11	6.95e-10
chr5	132409792	132410262	7.59	4.81	2.78	4.93e-11	6.98e-10
chr14	22171682	22172370	8.91	6.25	2.66	4.96e-11	7.02e-10
chr14	105615419	105616189	7.82	5.48	2.34	4.96e-11	7.02e-10
chr15	98155916	98156430	8.99	6.27	2.72	5e-11	7.07e-10
chr5	135702386	135703322	8.69	6.48	2.22	5.05e-11	7.14e-10
chr11	61905990	61906692	8.05	5.25	2.8	5.06e-11	7.16e-10
chr7	89560795	89561361	8.14	5.64	2.5	5.13e-11	7.24e-10
chr15	81301080	81301659	8.36	5.87	2.5	5.17e-11	7.29e-10
chr1	129542410	129543154	9.65	7.03	2.62	5.17e-11	7.3e-10
chr1	90408455	90409233	8.97	6.29	2.67	5.26e-11	7.41e-10
chr8	69114815	69115384	8.73	5.8	2.93	5.27e-11	7.42e-10
chr3	117076447	117077235	7.93	5.35	2.58	5.29e-11	7.45e-10
chr13	51539701	51540401	8.25	6.04	2.22	5.3e-11	7.46e-10
chr2	173730127	173730979	8.56	5.87	2.69	5.31e-11	7.48e-10
chr11	60436546	60437255	8.63	6.01	2.62	5.33e-11	7.5e-10
chr14	16554171	16555060	9.25	7.27	1.98	5.34e-11	7.51e-10
chr4	145257428	145258503	9.2	7	2.2	5.37e-11	7.55e-10
chr3	57621443	57621840	6.36	3.44	2.92	5.41e-11	7.61e-10
chr1	194908876	194909390	7.92	4	3.93	5.5e-11	7.72e-10
chr7	89178576	89179094	7.46	4.92	2.54	5.5e-11	7.73e-10
chr2	180115203	180115642	8.62	6.29	2.34	5.51e-11	7.74e-10
chr13	32884763	32885170	7.43	4.57	2.85	5.52e-11	7.75e-10
chr2	75763161	75763722	8.92	6.31	2.61	5.55e-11	7.8e-10
chr8	67891248	67891949	8.06	5.74	2.32	5.6e-11	7.86e-10
chr9	67207982	67209030	8.91	6.02	2.89	5.61e-11	7.86e-10
chr13	112810345	112811326	9.02	6.96	2.06	5.69e-11	7.97e-10
chr11	22437308	22437922	8.83	6.71	2.12	5.69e-11	7.98e-10
chr12	4528072	4528653	7.84	5.63	2.21	5.74e-11	8.04e-10
chr6	18301829	18302900	9.43	6.34	3.08	5.75e-11	8.05e-10
chr3	109155812	109156525	8.54	5.46	3.08	5.81e-11	8.14e-10
chr11	119933131	119933689	8.78	6.56	2.22	5.84e-11	8.17e-10
chr4	36311473	36312135	8.63	6.29	2.35	5.84e-11	8.17e-10
chr5	77374829	77375479	9.52	6.65	2.86	5.89e-11	8.24e-10
chr18	62691116	62691763	8.28	6.14	2.14	5.9e-11	8.24e-10
chr18	44472501	44473483	9.42	6.77	2.66	5.93e-11	8.28e-10
chr11	64971211	64971973	8.07	5.91	2.16	6e-11	8.38e-10
chr4	133158746	133159573	8.38	5.78	2.6	6.01e-11	8.39e-10
chr7	72143283	72143885	7.93	5.13	2.81	6.06e-11	8.46e-10
chrX	12959735	12960280	6.82	4.17	2.65	6.1e-11	8.51e-10
chrX	97372855	97373195	6.95	4.05	2.9	6.12e-11	8.54e-10
chr2	10250333	10251171	9.47	7.36	2.1	6.15e-11	8.58e-10
chrX	105891725	105892396	7.2	3.78	3.42	6.2e-11	8.65e-10
chr3	60504718	60505391	9.03	6.03	3	6.22e-11	8.68e-10
chr13	112343499	112344632	9.55	6.71	2.84	6.26e-11	8.73e-10
chr5	24274117	24274633	7.96	5.38	2.58	6.3e-11	8.78e-10
chr2	118110184	118110996	9.6	6.76	2.85	6.31e-11	8.79e-10
chr1	135020965	135021497	8.7	6.11	2.58	6.41e-11	8.92e-10
chrX	162510261	162510942	8.32	4.98	3.34	6.46e-11	8.99e-10
chr3	126913985	126914621	8.43	6.07	2.36	6.47e-11	9e-10
chr7	66178918	66179567	8.6	6.14	2.46	6.49e-11	9.03e-10
chr14	56034281	56034846	8.05	5.43	2.62	6.5e-11	9.04e-10
chr9	70666790	70667415	7.62	5.25	2.37	6.53e-11	9.07e-10
chr13	47272888	47273271	7.72	5.39	2.34	6.53e-11	9.07e-10
chr16	43217312	43218002	7.7	4.95	2.75	6.54e-11	9.09e-10
chr18	75021944	75022541	7.8	4.88	2.92	6.57e-11	9.13e-10
chr16	22095685	22096168	8.17	5.46	2.71	6.58e-11	9.15e-10
chr6	120470470	120471177	8.77	6.44	2.33	6.61e-11	9.18e-10
chr1	30789024	30789351	7.3	4.74	2.56	6.64e-11	9.21e-10
chr7	28791671	28792085	7.43	4.88	2.55	6.66e-11	9.25e-10
chr1	173766582	173767525	8.06	5.33	2.73	6.75e-11	9.36e-10
chr18	50066018	50066333	6.96	4.06	2.91	6.75e-11	9.36e-10
chr12	104422616	104423072	7.53	5.12	2.41	6.77e-11	9.39e-10
chr8	70237816	70238235	7.56	4.65	2.91	6.8e-11	9.43e-10
chr14	7873246	7874044	9.05	6.62	2.43	6.81e-11	9.43e-10
chr1	6457760	6458391	8.68	5.8	2.88	6.81e-11	9.44e-10
chr12	81688428	81688987	8.31	5.33	2.98	6.86e-11	9.5e-10
chr6	71418887	71419403	7.7	4.98	2.73	6.87e-11	9.52e-10
chr17	70746710	70747190	8.17	5.81	2.36	6.88e-11	9.53e-10
chr8	45579675	45580367	8.55	5.56	2.98	6.92e-11	9.58e-10
chr1	75248041	75248798	9.39	7.07	2.32	6.97e-11	9.64e-10
chr5	121807140	121807574	7.87	5.15	2.72	7.02e-11	9.7e-10
chr14	31868583	31869078	7.29	4.23	3.07	7.07e-11	9.78e-10
chr3	19706414	19707334	8.36	6.19	2.17	7.08e-11	9.8e-10
chr10	76446458	76446799	7.79	5.33	2.46	7.12e-11	9.84e-10
chrX	167344346	167344810	6.86	3.63	3.24	7.13e-11	9.86e-10
chrX	38428778	38429168	7.41	4.39	3.02	7.17e-11	9.91e-10
chr1	170766851	170767365	7.97	5.42	2.55	7.18e-11	9.92e-10
chr13	104074617	104075221	8.8	6.11	2.69	7.21e-11	9.96e-10
chr7	67719248	67719703	7.91	5.52	2.39	7.26e-11	1e-09
chr8	47056073	47056499	7.4	4.5	2.9	7.29e-11	1.01e-09
chr2	15538516	15539070	8.48	6.38	2.1	7.29e-11	1.01e-09
chr5	103730553	103731133	8.31	5.06	3.25	7.29e-11	1.01e-09
chr17	65662580	65663186	8.37	5.95	2.43	7.3e-11	1.01e-09
chrX	169106133	169106759	7.46	4.96	2.5	7.32e-11	1.01e-09
chr6	37255629	37256535	9.09	6.37	2.73	7.36e-11	1.01e-09
chr10	93432450	93433241	8.87	6.33	2.53	7.42e-11	1.02e-09
chr5	118513926	118514644	8.93	6.64	2.29	7.42e-11	1.02e-09
chr1	71893484	71894042	8.36	5.6	2.76	7.45e-11	1.03e-09
chr5	64174253	64175258	9.39	6.65	2.74	7.47e-11	1.03e-09
chr6	24549769	24550195	7.53	4.88	2.65	7.48e-11	1.03e-09
chr8	95852149	95852777	8.46	6.42	2.04	7.51e-11	1.03e-09
chr12	32434994	32435533	7.9	5.59	2.31	7.57e-11	1.04e-09
chr15	53171082	53171831	8.87	5.23	3.64	7.62e-11	1.05e-09
chr13	41403785	41404276	8.22	5.87	2.36	7.63e-11	1.05e-09
chr17	80765193	80765787	7.71	4.86	2.85	7.66e-11	1.05e-09
chr5	134532334	134532817	7.54	4.28	3.25	7.68e-11	1.06e-09
chr14	120347525	120348438	9.03	6.72	2.32	7.78e-11	1.07e-09
chr7	119835954	119836767	8.5	5.48	3.02	7.8e-11	1.07e-09
chr4	80971844	80972461	7.93	5.58	2.35	7.85e-11	1.08e-09
chr8	14992135	14992512	7.9	5.55	2.36	7.86e-11	1.08e-09
chr13	29202320	29203101	9.45	6.53	2.92	7.89e-11	1.08e-09
chr19	36860273	36860992	8.63	5.83	2.8	7.93e-11	1.09e-09
chr8	25304537	25305238	8.46	6.19	2.27	8e-11	1.1e-09
chr4	143143544	143144025	7.5	5.09	2.41	8.08e-11	1.11e-09
chr3	144602694	144603163	7.44	4.69	2.75	8.11e-11	1.11e-09
chr12	95765020	95765680	7.95	5.54	2.41	8.12e-11	1.11e-09
chr2	104145966	104146464	8.25	5.03	3.22	8.14e-11	1.11e-09
chr6	144710626	144711351	7.97	5.65	2.32	8.15e-11	1.12e-09
chr5	90881525	90882114	7.8	4.4	3.39	8.18e-11	1.12e-09
chr2	134527689	134528399	8.72	6.43	2.29	8.21e-11	1.12e-09
chr10	40066925	40067525	8.45	4.61	3.84	8.24e-11	1.13e-09
chrX	166804435	166804815	6.09	2.71	3.38	8.26e-11	1.13e-09
chr5	118637787	118638356	8.17	6.07	2.11	8.32e-11	1.14e-09
chr9	101228663	101229282	8.19	4.85	3.34	8.36e-11	1.14e-09
chr1	40714801	40715451	8.04	5.72	2.32	8.49e-11	1.16e-09
chr1	16227833	16228911	9.89	7.62	2.27	8.55e-11	1.17e-09
chr11	83563699	83564344	8.04	5.56	2.47	8.6e-11	1.17e-09
chr18	83817315	83817937	8.88	5.78	3.1	8.62e-11	1.18e-09
chr19	6876664	6877394	8.8	5.95	2.84	8.72e-11	1.19e-09
chr12	70117007	70117567	6.97	4.16	2.81	8.74e-11	1.19e-09
chr11	32358383	32358809	8.07	5.22	2.85	8.76e-11	1.19e-09
chr7	125898882	125899474	8.69	6.5	2.19	8.79e-11	1.2e-09
chr8	70880021	70881120	10.11	7.97	2.13	8.84e-11	1.2e-09
chr2	152927404	152927799	8.14	5.77	2.37	8.85e-11	1.2e-09
chr6	60813499	60814086	8.49	4.76	3.73	8.9e-11	1.21e-09
chr6	30343880	30344440	8.57	5.88	2.69	8.98e-11	1.22e-09
chr6	54737281	54738068	9.2	6.12	3.07	8.99e-11	1.22e-09
chr10	8330910	8331600	7.61	5.15	2.46	9.03e-11	1.23e-09
chr14	121037237	121037678	8.57	5.96	2.61	9.04e-11	1.23e-09
chr1	159595705	159596208	8.67	6.48	2.19	9.16e-11	1.24e-09
chr5	150611647	150612340	8.5	6.1	2.39	9.19e-11	1.25e-09
chr4	40189395	40189934	8.17	5.84	2.33	9.2e-11	1.25e-09
chr5	106919183	106919970	8.02	5.7	2.32	9.27e-11	1.26e-09
chr9	6539736	6540881	9.71	5.89	3.82	9.36e-11	1.27e-09
chr5	28397144	28397724	8.17	5.76	2.41	9.43e-11	1.28e-09
chr10	59577775	59579086	10.14	7.95	2.19	9.53e-11	1.29e-09
chr2	113773248	113773797	7.64	5.2	2.44	9.56e-11	1.3e-09
chrX	162340493	162341035	6.98	4.18	2.81	9.57e-11	1.3e-09
chr3	93025452	93026118	8.72	6.3	2.42	9.58e-11	1.3e-09
chr1	34044119	34045161	8.57	5.88	2.68	9.6e-11	1.3e-09
chr15	79414363	79414987	8.64	5.92	2.72	9.61e-11	1.3e-09
chr8	73293420	73294187	8.73	5.63	3.1	9.63e-11	1.3e-09
chr3	69524493	69525731	8.71	6.55	2.16	9.69e-11	1.31e-09
chr12	81263255	81264110	8.85	6.63	2.23	9.77e-11	1.32e-09
chrX	47976499	47977090	7.22	4.39	2.83	9.78e-11	1.32e-09
chr10	84584341	84585157	7.96	5.64	2.32	9.81e-11	1.33e-09
chr10	80104196	80104621	8.04	5.25	2.79	9.83e-11	1.33e-09
chr18	9444759	9445180	7.74	5.03	2.71	9.95e-11	1.34e-09
chr15	59759443	59760359	9.09	6.58	2.51	1e-10	1.36e-09
chr4	94752375	94753534	9.68	7.27	2.41	1e-10	1.36e-09
chrX	160509038	160509743	7.38	4.06	3.32	1e-10	1.36e-09
chr15	38572393	38573167	9.23	6.68	2.55	1.01e-10	1.36e-09
chr12	26503104	26503802	7.23	4.54	2.69	1.01e-10	1.36e-09
chr13	45839737	45840502	8.74	5.81	2.93	1.01e-10	1.37e-09
chr8	88792505	88793198	8.64	6.4	2.23	1.02e-10	1.37e-09
chr7	39588430	39589067	6.56	0.53	6.03	1.02e-10	1.37e-09
chr7	123084134	123085136	9.11	6.95	2.16	1.02e-10	1.37e-09
chr14	86934683	86935187	7.62	4.05	3.57	1.02e-10	1.38e-09
chr6	95635007	95635762	8.94	6.24	2.7	1.02e-10	1.38e-09
chr13	110545215	110545953	9.09	5.99	3.1	1.03e-10	1.39e-09
chr9	41515062	41515703	8.84	5.1	3.74	1.03e-10	1.39e-09
chr5	30279002	30279862	8.72	6.57	2.16	1.03e-10	1.39e-09
chr1	13593244	13593514	6.33	3.22	3.11	1.03e-10	1.39e-09
chr10	39975035	39975354	5.33	0.53	4.81	1.04e-10	1.4e-09
chr10	111078859	111079507	8.19	5.8	2.39	1.05e-10	1.41e-09
chr6	34204913	34205576	9.11	6.68	2.43	1.05e-10	1.41e-09
chr5	5319860	5321374	9.09	6.93	2.16	1.05e-10	1.41e-09
chr19	28624439	28625092	8.68	5.53	3.14	1.05e-10	1.41e-09
chr1	150760955	150761414	7.61	5.22	2.39	1.05e-10	1.41e-09
chr6	140953728	140954233	7.19	4.57	2.63	1.05e-10	1.42e-09
chr12	98283130	98283976	9.63	6.38	3.25	1.05e-10	1.42e-09
chr18	33908038	33908630	8.37	6.07	2.3	1.06e-10	1.42e-09
chr2	132970697	132971237	7.89	5.51	2.38	1.06e-10	1.43e-09
chr10	25457958	25458623	8.01	4.99	3.02	1.07e-10	1.43e-09
chr18	34958238	34958809	9.05	6.21	2.84	1.09e-10	1.46e-09
chr16	22107980	22108568	8.48	5.78	2.7	1.11e-10	1.48e-09
chr7	141371932	141372623	9.21	5.98	3.23	1.11e-10	1.49e-09
chr4	68865110	68865894	8.52	5.96	2.56	1.12e-10	1.5e-09
chr5	17439388	17440116	8.15	4.71	3.44	1.12e-10	1.5e-09
chr10	43657441	43658142	8.26	5.65	2.6	1.13e-10	1.51e-09
chr8	128239721	128240349	7.73	4.94	2.78	1.13e-10	1.51e-09
chrX	94022430	94022971	7.73	3.6	4.13	1.14e-10	1.52e-09
chr8	84966602	84967068	7.52	4.85	2.67	1.14e-10	1.53e-09
chr10	111392852	111393238	7.12	4.48	2.64	1.15e-10	1.54e-09
chr15	25432137	25432733	8.59	6.17	2.42	1.16e-10	1.55e-09
chr7	48924952	48925724	9.19	6.47	2.71	1.17e-10	1.56e-09
chr2	172467185	172467636	8	5.54	2.46	1.17e-10	1.56e-09
chr14	123530974	123531755	8.47	6.29	2.19	1.19e-10	1.58e-09
chr14	5879150	5880444	6.53	2.5	4.04	1.2e-10	1.6e-09
chr17	36281282	36282144	9.34	7.28	2.06	1.2e-10	1.6e-09
chr1	40967873	40968754	8.35	6.16	2.19	1.21e-10	1.62e-09
chr2	51305407	51305981	8.75	5.83	2.92	1.22e-10	1.62e-09
chr1	35815928	35816631	8.05	5.95	2.1	1.22e-10	1.62e-09
chr3	103255936	103256812	9.08	6.58	2.5	1.22e-10	1.62e-09
chr10	7841470	7842364	9.47	7.44	2.03	1.22e-10	1.63e-09
chr13	42088260	42088875	8	5.86	2.14	1.22e-10	1.63e-09
chr5	52219900	52220598	9.12	7.05	2.07	1.23e-10	1.63e-09
chr18	37927806	37928240	7.34	4.59	2.75	1.23e-10	1.63e-09
chrX	13398449	13398940	7.43	3.44	3.99	1.23e-10	1.63e-09
chr14	106975182	106975905	7.84	5.58	2.26	1.23e-10	1.64e-09
chrX	48042186	48042580	7.2	3.61	3.6	1.24e-10	1.64e-09
chr3	90589417	90589802	7.99	5.79	2.19	1.24e-10	1.65e-09
chrX	7308187	7308694	6.79	4.17	2.62	1.25e-10	1.66e-09
chr10	8431737	8432409	8.26	5.68	2.58	1.27e-10	1.68e-09
chr2	181415930	181416428	8.13	5.79	2.34	1.27e-10	1.68e-09
chr12	118189552	118189903	7.13	4.6	2.53	1.27e-10	1.69e-09
chrX	163938592	163939000	6.72	4.17	2.55	1.27e-10	1.69e-09
chr15	41693036	41693615	7.69	4.57	3.12	1.27e-10	1.69e-09
chr11	49879907	49880662	8.91	6.29	2.62	1.28e-10	1.7e-09
chr2	3218081	3219225	9.69	7.04	2.65	1.28e-10	1.7e-09
chr13	107090959	107091479	8.43	5.68	2.74	1.28e-10	1.7e-09
chrX	56736078	56736634	7.38	5.08	2.3	1.29e-10	1.71e-09
chr18	54852836	54853475	9.44	7.5	1.93	1.29e-10	1.71e-09
chrX	138978492	138978890	6.13	2.55	3.59	1.29e-10	1.72e-09
chr10	99555888	99556717	7.97	5.37	2.6	1.3e-10	1.73e-09
chr11	71581710	71582321	8.56	6.27	2.29	1.33e-10	1.76e-09
chr1	128398765	128399669	9.33	6.57	2.76	1.33e-10	1.76e-09
chr3	149042399	149042975	8.9	6.83	2.07	1.35e-10	1.78e-09
chr15	98014117	98014704	8.36	5.8	2.56	1.35e-10	1.78e-09
chr1	192187986	192188536	7.98	4.91	3.07	1.35e-10	1.79e-09
chr4	59895016	59895752	8.55	6.29	2.26	1.35e-10	1.79e-09
chr12	76307978	76308407	7.46	5.1	2.36	1.37e-10	1.81e-09
chr1	12715313	12715821	8.23	5.24	2.99	1.39e-10	1.83e-09
chr18	64045151	64046332	9.26	6.54	2.72	1.39e-10	1.84e-09
chr9	48609535	48610282	8.21	5.62	2.59	1.39e-10	1.84e-09
chr7	70568901	70569608	8.3	6.07	2.23	1.39e-10	1.84e-09
chr13	41705487	41706093	9.08	5.84	3.24	1.4e-10	1.84e-09
chr18	4032199	4033017	8.78	6.48	2.3	1.4e-10	1.84e-09
chr3	131669861	131670341	7.43	4.96	2.47	1.4e-10	1.84e-09
chr8	24985884	24986281	7.42	4.82	2.59	1.41e-10	1.85e-09
chr7	143624541	143625606	9.51	6.79	2.72	1.41e-10	1.86e-09
chr3	116651887	116652483	8.6	5.95	2.66	1.41e-10	1.86e-09
chr3	60078775	60079380	7.94	4.84	3.11	1.42e-10	1.86e-09
chr12	85203360	85204184	9.47	6.65	2.82	1.43e-10	1.88e-09
chr18	20782355	20782828	7.48	4.34	3.14	1.43e-10	1.89e-09
chr15	83432663	83433297	8.9	6.78	2.12	1.43e-10	1.89e-09
chr18	62917783	62918213	7.8	4.82	2.98	1.44e-10	1.89e-09
chr17	27561715	27562523	9.13	6.44	2.69	1.44e-10	1.9e-09
chr3	57388571	57389019	7.6	4.93	2.66	1.44e-10	1.9e-09
chr2	179979806	179980220	8.1	5.81	2.29	1.46e-10	1.92e-09
chr8	36898678	36899556	7.99	5.17	2.82	1.46e-10	1.92e-09
chrX	16954766	16955201	7.31	4.74	2.58	1.47e-10	1.93e-09
chr15	95802693	95803169	8.85	6.7	2.15	1.47e-10	1.93e-09
chr19	34051454	34052132	8.67	6.18	2.49	1.47e-10	1.93e-09
chr13	3744099	3744521	7.35	4.81	2.54	1.48e-10	1.94e-09
chr3	151351358	151352490	9.71	7.65	2.06	1.49e-10	1.95e-09
chr6	17408089	17408691	7.86	5.05	2.81	1.5e-10	1.96e-09
chr4	72664349	72665062	7.62	4.53	3.09	1.5e-10	1.97e-09
chr11	54801780	54802579	8.52	6.17	2.34	1.51e-10	1.98e-09
chr13	101659017	101659497	8.09	5.83	2.26	1.51e-10	1.98e-09
chr5	8719569	8720088	8.46	5.37	3.09	1.51e-10	1.98e-09
chrX	53214311	53215205	8.39	5.86	2.53	1.52e-10	1.99e-09
chr8	117730909	117731733	9.24	6.9	2.34	1.52e-10	2e-09
chr5	136949499	136949955	7.36	4.69	2.67	1.53e-10	2e-09
chr2	44526234	44526911	7.99	5.79	2.2	1.53e-10	2.01e-09
chr4	48542285	48542751	7.91	5.23	2.68	1.54e-10	2.01e-09
chr3	38276953	38277703	9.69	5.81	3.88	1.55e-10	2.03e-09
chr1	189761551	189762076	7.82	5.36	2.46	1.55e-10	2.03e-09
chr9	44039719	44040304	8.34	5.64	2.7	1.58e-10	2.06e-09
chr12	108832170	108832657	8.55	6.55	2	1.58e-10	2.06e-09
chr2	14165454	14166198	9.46	6.57	2.88	1.58e-10	2.07e-09
chr9	25244344	25244592	7.08	3.71	3.38	1.58e-10	2.07e-09
chr15	11524341	11525028	8.24	4.53	3.71	1.59e-10	2.07e-09
chr13	104448157	104448726	8.36	4.72	3.64	1.61e-10	2.11e-09
chr7	89445130	89445546	7.51	4.99	2.52	1.62e-10	2.11e-09
chr1	82793102	82793644	7.77	5.05	2.73	1.62e-10	2.11e-09
chr8	31546622	31547116	7.9	5.25	2.66	1.62e-10	2.12e-09
chr2	145948484	145949322	8.13	5.74	2.39	1.62e-10	2.12e-09
chr17	24855733	24856253	7.38	5.08	2.3	1.63e-10	2.12e-09
chr10	120628073	120628584	8.93	5.92	3	1.64e-10	2.13e-09
chrX	42017855	42018463	6.99	4.4	2.6	1.64e-10	2.14e-09
chr8	118679299	118680199	9.33	7.02	2.31	1.64e-10	2.14e-09
chr15	33126745	33127331	7.99	5	2.99	1.65e-10	2.14e-09
chr7	80375274	80375879	8.9	6.29	2.61	1.65e-10	2.15e-09
chr2	116704535	116705230	8.98	5.59	3.38	1.66e-10	2.16e-09
chr11	59913641	59914209	7.57	4.69	2.88	1.67e-10	2.17e-09
chr1	158248672	158249253	8.18	5.78	2.4	1.67e-10	2.18e-09
chr13	114895804	114896294	8.58	6.2	2.38	1.67e-10	2.18e-09
chr19	47886560	47887093	8.88	5.63	3.25	1.68e-10	2.18e-09
chr17	12754303	12755184	8.87	6.56	2.32	1.69e-10	2.19e-09
chrX	99530944	99531634	8.43	5.77	2.66	1.69e-10	2.19e-09
chr5	37876219	37876822	7.99	5.7	2.29	1.69e-10	2.19e-09
chr7	51892381	51893054	8.26	5.77	2.49	1.7e-10	2.2e-09
chr10	26114343	26114804	7.76	5.26	2.5	1.71e-10	2.22e-09
chr16	94362115	94362566	7.55	4.57	2.99	1.72e-10	2.24e-09
chr18	83895079	83895838	9.08	6.25	2.82	1.73e-10	2.25e-09
chr7	25711715	25712169	8.66	6.38	2.28	1.74e-10	2.26e-09
chr2	141271542	141272090	8.21	5.21	3	1.75e-10	2.27e-09
chr18	14724664	14725105	8.11	5.38	2.73	1.76e-10	2.28e-09
chr9	48760339	48760948	8.33	5.42	2.9	1.76e-10	2.28e-09
chr5	105827063	105827476	7.22	4.63	2.6	1.77e-10	2.29e-09
chr9	65541551	65542033	8.11	5.83	2.28	1.77e-10	2.29e-09
chr8	123887959	123888453	7.02	4.22	2.8	1.77e-10	2.3e-09
chr5	111247526	111248411	9.01	6.56	2.45	1.79e-10	2.31e-09
chr2	79982997	79983695	8.45	5.96	2.48	1.8e-10	2.33e-09
chr6	47997398	47998345	8.84	5.84	3	1.8e-10	2.33e-09
chr3	83994193	83994646	8.2	5.39	2.81	1.81e-10	2.34e-09
chr8	10909896	10910911	8.67	6.34	2.33	1.81e-10	2.34e-09
chr4	28382931	28384066	9.47	7.08	2.39	1.83e-10	2.36e-09
chr15	101183335	101183823	7.79	4.82	2.97	1.83e-10	2.37e-09
chr9	67105621	67106290	7.89	5.1	2.79	1.84e-10	2.37e-09
chr9	83546315	83546730	7.93	5.25	2.68	1.84e-10	2.38e-09
chr3	90587650	90588245	9	6.04	2.96	1.85e-10	2.39e-09
chr1	82428855	82429667	8.91	6.92	1.99	1.85e-10	2.39e-09
chr8	68081646	68082356	8.39	5.77	2.62	1.85e-10	2.39e-09
chr7	98391263	98391989	9.68	6.05	3.63	1.86e-10	2.4e-09
chr2	29119393	29119829	7.9	5.19	2.71	1.87e-10	2.41e-09
chr5	92812897	92813299	7.22	4.56	2.65	1.87e-10	2.41e-09
chr3	135674602	135675309	8.34	6.18	2.16	1.87e-10	2.41e-09
chr2	91299024	91299554	7.89	5.38	2.51	1.9e-10	2.45e-09
chr7	24599611	24600096	7.95	5.65	2.3	1.9e-10	2.45e-09
chr2	146560431	146561258	9.79	6.93	2.86	1.9e-10	2.45e-09
chr7	114101451	114102196	8.06	4.84	3.22	1.9e-10	2.45e-09
chr7	125539188	125539774	8.82	5.99	2.83	1.91e-10	2.46e-09
chr3	27209612	27210690	8.98	6.33	2.65	1.92e-10	2.48e-09
chr5	44273286	44273990	7.41	4.99	2.42	1.94e-10	2.5e-09
chr4	139227853	139228268	7.86	5.54	2.32	1.94e-10	2.5e-09
chr7	65802209	65802699	7.27	4.48	2.79	1.94e-10	2.5e-09
chr8	67964220	67964726	7.52	4.92	2.6	1.94e-10	2.5e-09
chr6	117541561	117542264	8.15	4.88	3.27	1.95e-10	2.5e-09
chr4	40275924	40276540	7.74	5.13	2.61	1.95e-10	2.5e-09
chr16	57393135	57393749	8.41	6.34	2.07	1.96e-10	2.52e-09
chr15	58164736	58165654	8.3	6	2.3	1.96e-10	2.52e-09
chr8	14850328	14851784	9.47	7.05	2.42	1.96e-10	2.52e-09
chr1	163152765	163153181	6.99	3.91	3.08	1.97e-10	2.53e-09
chr17	88195195	88195891	7.81	5.2	2.62	1.97e-10	2.53e-09
chr14	13242745	13243168	7.07	4.43	2.64	1.98e-10	2.54e-09
chr5	31576556	31577184	9.07	6.54	2.53	1.98e-10	2.54e-09
chrX	152716497	152717104	7.62	4.64	2.97	1.98e-10	2.55e-09
chr13	117409889	117410383	7.71	5.41	2.3	2e-10	2.56e-09
chr18	78072131	78072862	8.3	6.03	2.27	2.01e-10	2.57e-09
chr13	113418040	113418553	8.33	6.08	2.25	2.01e-10	2.58e-09
chr6	120927521	120928265	9.46	7.05	2.41	2.01e-10	2.58e-09
chr11	109593361	109594057	8.24	6.08	2.15	2.02e-10	2.59e-09
chr17	16339907	16340542	7.75	5.07	2.68	2.02e-10	2.59e-09
chr14	27781122	27781901	8.92	6.45	2.47	2.02e-10	2.6e-09
chr3	68676787	68677447	8.62	6.17	2.45	2.03e-10	2.6e-09
chr2	151540410	151540822	8.11	4.99	3.12	2.03e-10	2.6e-09
chr5	118659680	118659984	6.91	4.22	2.69	2.04e-10	2.62e-09
chr9	75955010	75955661	7.86	5.61	2.25	2.04e-10	2.62e-09
chr16	49970192	49971225	8.84	6.71	2.13	2.05e-10	2.63e-09
chr9	41479915	41480609	9.08	6.79	2.29	2.06e-10	2.64e-09
chr1	55865129	55865833	8.66	6.37	2.29	2.07e-10	2.65e-09
chr17	88628689	88629358	8.81	6.37	2.44	2.08e-10	2.67e-09
chrX	136305907	136306703	8.81	5.19	3.62	2.09e-10	2.67e-09
chr10	59131772	59132553	8.85	6.53	2.32	2.11e-10	2.7e-09
chr18	36492439	36493675	10.06	7.31	2.75	2.11e-10	2.7e-09
chr15	62118828	62119545	8.61	6.09	2.52	2.12e-10	2.71e-09
chr8	12779318	12780090	8.71	6.58	2.13	2.13e-10	2.72e-09
chr6	128364594	128365204	7.85	5.58	2.27	2.14e-10	2.73e-09
chr7	77103757	77104562	7.8	5.19	2.61	2.14e-10	2.73e-09
chr15	26834382	26834875	7.76	5.21	2.55	2.15e-10	2.74e-09
chr19	47853851	47854271	7.59	5.3	2.29	2.16e-10	2.76e-09
chr2	124244580	124245382	8.41	6.31	2.1	2.16e-10	2.76e-09
chr16	42784638	42785138	8.13	5.59	2.54	2.18e-10	2.78e-09
chr14	117427578	117428253	8.42	5.61	2.8	2.19e-10	2.79e-09
chr2	112308451	112309585	8.86	6.3	2.56	2.19e-10	2.79e-09
chr7	117486272	117487263	8.54	6.48	2.07	2.19e-10	2.79e-09
chr3	38459481	38459934	7.89	4.66	3.23	2.19e-10	2.79e-09
chr1	33467399	33468123	8.07	5.55	2.52	2.2e-10	2.8e-09
chrX	134324875	134325489	7.03	4.53	2.5	2.21e-10	2.81e-09
chr13	7103165	7103684	7.71	5.2	2.51	2.21e-10	2.82e-09
chrX	36599031	36599436	7.57	4.58	2.99	2.22e-10	2.83e-09
chrX	94127356	94127720	6.35	3.22	3.13	2.22e-10	2.83e-09
chr2	37784267	37784893	8.43	6.22	2.21	2.23e-10	2.84e-09
chr15	61608176	61608950	8.17	6.04	2.13	2.25e-10	2.87e-09
chr18	69143902	69144580	8.44	6.16	2.28	2.27e-10	2.88e-09
chr10	39415608	39415971	8.11	6	2.11	2.28e-10	2.9e-09
chr7	66339589	66340213	7.93	5.46	2.46	2.29e-10	2.91e-09
chrX	76022000	76022504	7.06	4.53	2.52	2.3e-10	2.92e-09
chrX	151951027	151951644	7.7	4.72	2.98	2.32e-10	2.94e-09
chr3	152512415	152512952	8.83	5.72	3.11	2.32e-10	2.95e-09
chr15	77798613	77799244	10.05	7.98	2.07	2.32e-10	2.95e-09
chr4	109481453	109481944	7.68	4.43	3.26	2.33e-10	2.96e-09
chr9	23566996	23567681	8.35	6.27	2.08	2.34e-10	2.97e-09
chr5	73182669	73183290	7.77	5.61	2.15	2.34e-10	2.97e-09
chr9	51031519	51032121	7.26	4.65	2.61	2.34e-10	2.97e-09
chr9	89695075	89695630	7.94	5.05	2.89	2.37e-10	3e-09
chr13	5823189	5823606	8.35	5.33	3.02	2.38e-10	3.02e-09
chr4	127327243	127327774	7.83	5.34	2.49	2.4e-10	3.04e-09
chr15	53138653	53139403	8.94	6.29	2.64	2.4e-10	3.04e-09
chr11	110438887	110439751	9	6.9	2.1	2.41e-10	3.05e-09
chrX	70883227	70884053	7.96	5.68	2.28	2.42e-10	3.06e-09
chr19	17833447	17833857	7.39	5.14	2.24	2.43e-10	3.08e-09
chr19	10565191	10565703	6.69	4.06	2.64	2.45e-10	3.1e-09
chr8	128663059	128663568	8.22	5.45	2.77	2.45e-10	3.1e-09
chr1	166267101	166267721	7.58	5.38	2.2	2.45e-10	3.1e-09
chr10	75121005	75121508	8.21	5.84	2.36	2.46e-10	3.11e-09
chr7	118929632	118930608	10.32	8.32	2	2.48e-10	3.13e-09
chr11	70467486	70468291	8.36	6.2	2.16	2.52e-10	3.18e-09
chr11	96602774	96603310	7.66	4.69	2.97	2.53e-10	3.2e-09
chr12	46930936	46931620	8.14	5.85	2.29	2.54e-10	3.21e-09
chr16	87348095	87348768	8.24	5.39	2.85	2.56e-10	3.22e-09
chr19	11994112	11994927	7.7	5.31	2.39	2.56e-10	3.23e-09
chr13	24565159	24566385	10.31	7.5	2.82	2.56e-10	3.23e-09
chr10	17011945	17013014	9.33	6.45	2.88	2.58e-10	3.25e-09
chr9	46110336	46111163	9.09	6.75	2.35	2.59e-10	3.26e-09
chr1	64601289	64602067	7.92	4.93	2.99	2.59e-10	3.26e-09
chr19	10497338	10498083	8.29	6.16	2.13	2.59e-10	3.26e-09
chr2	73609031	73609641	8.61	6.01	2.6	2.59e-10	3.27e-09
chr12	91745656	91746406	8.6	6.32	2.28	2.6e-10	3.28e-09
chr5	43807805	43808597	8.65	6.36	2.29	2.62e-10	3.29e-09
chr1	135016858	135017285	7.62	4.53	3.09	2.62e-10	3.3e-09
chr8	25653703	25654341	8.58	6.26	2.32	2.62e-10	3.3e-09
chr18	56620904	56621589	8.95	5.84	3.1	2.63e-10	3.31e-09
chr2	117956442	117957024	7.64	5.28	2.36	2.64e-10	3.32e-09
chr9	32709335	32710253	9.83	7.64	2.19	2.65e-10	3.33e-09
chr8	61464183	61464673	7.52	5.12	2.4	2.65e-10	3.33e-09
chr6	55437889	55438515	8.72	6.1	2.62	2.67e-10	3.35e-09
chr4	129793861	129794328	7.62	5.28	2.34	2.67e-10	3.36e-09
chr17	62939021	62939648	7.37	4.95	2.42	2.69e-10	3.38e-09
chr10	79116011	79116910	9.67	6.94	2.73	2.71e-10	3.4e-09
chr9	47575050	47575471	7.59	4.96	2.64	2.72e-10	3.41e-09
chr1	189716084	189716870	9.18	6.84	2.34	2.72e-10	3.42e-09
chr5	93035234	93035646	6.61	2.7	3.91	2.72e-10	3.42e-09
chrX	129372534	129373208	7.84	4.12	3.72	2.73e-10	3.42e-09
chr13	64155176	64155593	8.89	6.29	2.59	2.74e-10	3.43e-09
chr19	21643606	21644338	7.84	5.66	2.18	2.75e-10	3.45e-09
chr16	49953752	49954302	8.84	6.73	2.1	2.75e-10	3.45e-09
chr4	141425460	141426424	8.56	6.36	2.19	2.76e-10	3.45e-09
chr14	116531583	116532264	7.83	5.35	2.48	2.78e-10	3.48e-09
chr16	49288688	49289687	9.17	6.33	2.84	2.79e-10	3.49e-09
chr11	105311385	105312102	8.66	6.61	2.05	2.79e-10	3.5e-09
chr10	4282388	4282773	6.76	3.96	2.79	2.8e-10	3.5e-09
chr14	40995105	40996153	9.03	6.49	2.54	2.8e-10	3.51e-09
chr13	23496720	23497278	7.95	5.17	2.78	2.82e-10	3.53e-09
chr12	16847278	16847866	8.78	6.47	2.31	2.83e-10	3.54e-09
chr14	21890322	21890987	7.58	5.31	2.27	2.83e-10	3.55e-09
chr3	130065481	130065921	7.89	4.54	3.36	2.86e-10	3.58e-09
chrX	164975749	164976354	8.5	6.3	2.2	2.87e-10	3.59e-09
chr12	80291770	80292518	8.13	5.68	2.45	2.87e-10	3.59e-09
chr6	82528509	82529277	8.87	6.06	2.81	2.88e-10	3.6e-09
chr3	27598747	27599363	8.47	6.25	2.21	2.91e-10	3.63e-09
chr1	182527831	182528606	9.46	6.87	2.59	2.92e-10	3.65e-09
chr7	144417530	144418207	8.68	6.6	2.08	2.93e-10	3.66e-09
chr14	118564464	118564995	8.87	5.21	3.66	2.94e-10	3.67e-09
chr15	38028150	38028631	7.59	5.36	2.22	2.95e-10	3.68e-09
chr17	26533700	26534169	7.95	5.15	2.8	2.96e-10	3.69e-09
chr1	156667473	156667914	6.78	4.11	2.68	2.96e-10	3.69e-09
chr5	86765652	86766250	7.7	5.24	2.46	2.99e-10	3.73e-09
chr8	10664452	10665438	9.59	6.97	2.62	3.01e-10	3.74e-09
chr1	34013493	34013916	7.73	5.44	2.29	3.03e-10	3.77e-09
chr4	83380147	83380819	8.79	5.91	2.87	3.03e-10	3.77e-09
chr16	89810855	89811485	8.58	6.27	2.31	3.05e-10	3.79e-09
chr10	93268289	93268711	7.25	4.92	2.33	3.06e-10	3.81e-09
chr10	21426097	21426999	8.87	6.6	2.28	3.07e-10	3.81e-09
chr14	56689560	56690242	7.79	5.71	2.08	3.07e-10	3.81e-09
chr6	146909711	146910318	8.31	6.09	2.22	3.08e-10	3.82e-09
chr5	50006915	50007805	9.9	7.83	2.07	3.1e-10	3.85e-09
chr19	41270075	41270974	9.1	6.7	2.4	3.1e-10	3.85e-09
chr1	10879969	10880736	9.12	7.15	1.97	3.1e-10	3.85e-09
chr14	121435730	121436336	8.37	5.33	3.04	3.11e-10	3.86e-09
chr12	69771612	69772207	7.49	4.98	2.51	3.16e-10	3.92e-09
chr16	42745960	42746715	8.59	5.71	2.89	3.16e-10	3.92e-09
chr19	32469894	32470519	7.84	5.14	2.7	3.16e-10	3.92e-09
chr19	8984455	8984895	9.13	6.63	2.5	3.16e-10	3.92e-09
chr13	107723012	107723495	7.8	5.55	2.26	3.21e-10	3.97e-09
chr7	24082908	24083302	8.2	6.16	2.04	3.22e-10	3.99e-09
chr2	11377101	11377665	8.1	5.39	2.71	3.24e-10	4.01e-09
chr5	148949817	148950727	9.29	7.08	2.21	3.25e-10	4.02e-09
chr15	95827454	95827745	7.2	4.34	2.86	3.27e-10	4.05e-09
chr17	33783399	33783844	8.38	5.83	2.55	3.28e-10	4.06e-09
chr2	125788310	125789252	7.91	5.86	2.05	3.29e-10	4.07e-09
chr19	37959484	37960128	8.6	5.63	2.96	3.32e-10	4.11e-09
chr6	134298085	134298761	7.75	5.43	2.32	3.33e-10	4.12e-09
chr4	57376902	57377400	8.06	5.69	2.37	3.34e-10	4.13e-09
chr5	92368391	92368958	7.58	4.89	2.69	3.36e-10	4.15e-09
chr9	8555575	8555814	5.9	0.53	5.37	3.41e-10	4.21e-09
chr9	118532568	118533665	8.68	5.93	2.75	3.46e-10	4.27e-09
chr19	18890182	18890789	8.36	5.87	2.49	3.51e-10	4.33e-09
chr12	102453433	102454156	8.43	5.64	2.79	3.53e-10	4.35e-09
chr6	120482658	120483688	9.22	6.89	2.33	3.54e-10	4.37e-09
chr6	17309289	17309673	8.15	5.47	2.68	3.55e-10	4.38e-09
chr4	121023836	121024510	8.16	5.82	2.34	3.56e-10	4.38e-09
chr8	6813612	6814464	8.48	5.12	3.37	3.56e-10	4.39e-09
chr9	75064459	75065313	8.34	6.21	2.13	3.56e-10	4.39e-09
chr12	86652354	86653147	9.29	7.23	2.06	3.57e-10	4.39e-09
chr9	40612226	40612792	8.63	6.07	2.56	3.6e-10	4.43e-09
chr5	20941193	20941758	8.98	6.53	2.45	3.62e-10	4.46e-09
chr1	74149055	74149633	8.17	5.08	3.09	3.63e-10	4.47e-09
chr10	89526854	89527504	8.62	6.4	2.22	3.63e-10	4.47e-09
chr18	67815166	67815729	7.71	5.34	2.37	3.63e-10	4.47e-09
chr7	64249372	64250188	9.78	7.67	2.11	3.64e-10	4.48e-09
chr2	13749863	13750891	9.46	7.42	2.05	3.65e-10	4.49e-09
chr1	64809052	64809564	8	5.64	2.36	3.66e-10	4.5e-09
chr13	20306142	20306847	8.51	5.84	2.67	3.66e-10	4.5e-09
chr14	106519430	106520010	7.77	5.28	2.49	3.67e-10	4.52e-09
chr3	149338672	149339333	8.34	5.48	2.86	3.68e-10	4.52e-09
[truncated: 18,655 more rows]
